# Supplementary material
Source: ML conference proceedings conference paper supplement (https://openreview.net/forum?id=IGYQ4c92e2)

# The Opening of a New Pasta Plant in Montreal, Canada

Marco Rossi

October 2023

## 1 Introduction

The pasta industry has seen an unprecedented growth trajectory in recent years, driven by the increasing global demand for Italian cuisine. In light of this, Great Pasta, a leader in the field, is excited to announce the opening of a new pasta plant in Montreal, Canada. This document will explore the implications of this development, the expected contributions to the local economy, and the strategic significance of this expansion.

## 2 Overview of the Pasta Industry

The global pasta market has grown significantly, with an estimated market size of \$48 billion in 2020 and projected growth at a CAGR of 3.5% from 2021 to 2028. Factors contributing to this growth include the rising popularity of Italian cuisine, health consciousness among consumers, and the increasing availability of gluten-free options.

## 3 The New Plant in Montreal

The new pasta plant in Montreal is a strategic move by Great Pasta to strengthen its North American operations. This facility will be designed to produce a range of pasta products, including traditional and gluten-free options, ensuring that we meet the diverse needs of our customers.

### 3.1 Economic Impact

The establishment of the plant is expected to create over 300 jobs in the region, contributing significantly to the local economy. The average salary for production workers

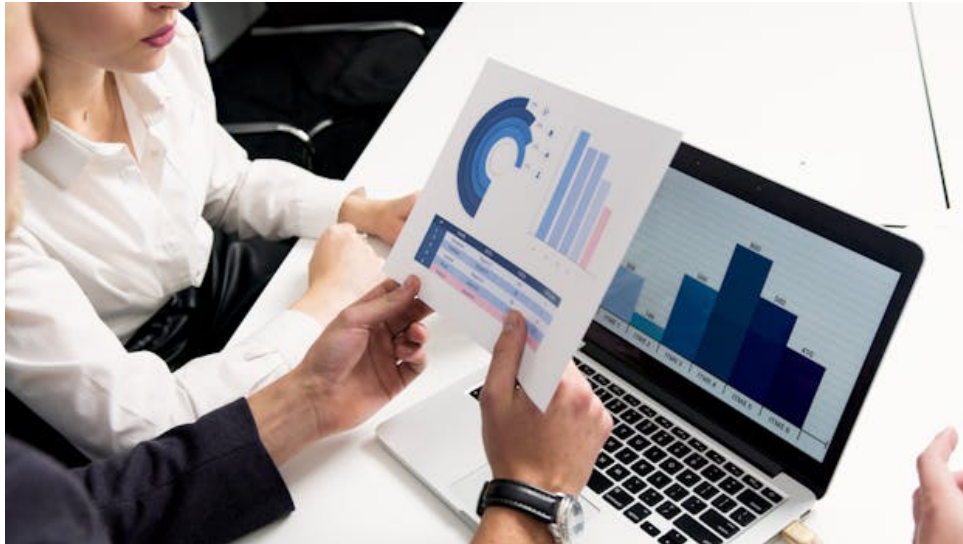

Figure 1: Growth of the Global Pasta Market (2020-2028)

in the food manufacturing sector in Quebec is approximately \$45,000 CAD, which will enhance the purchasing power of the local community.

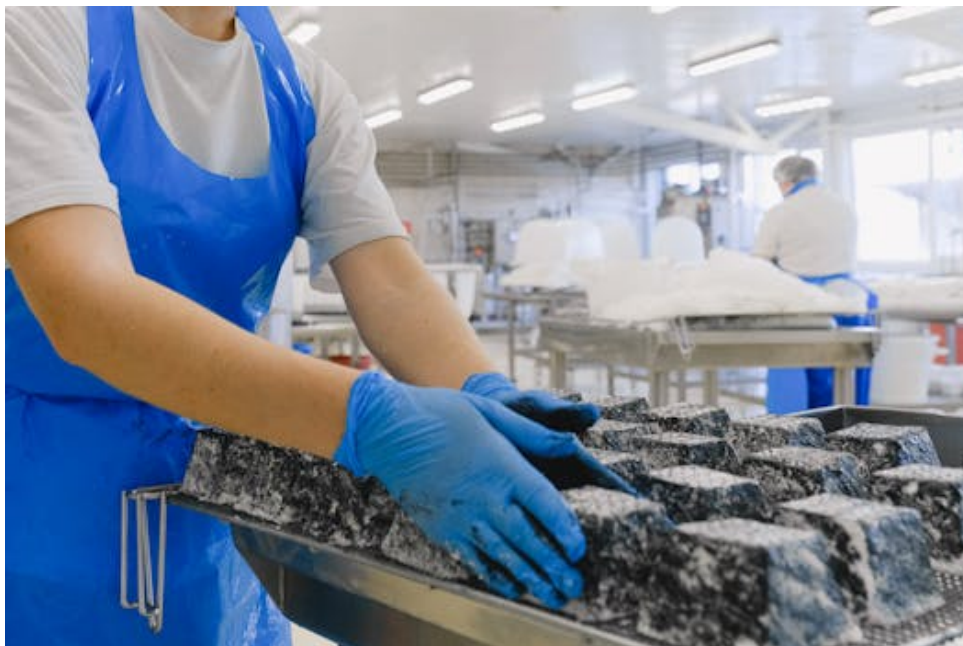

Figure 2: Projected Employment Growth in Montreal Due to New Plant

## 4 Production Capacity and Technology

The new plant will be equipped with state-of-the-art technology to ensure high efficiency and quality in pasta production. The initial production capacity is projected to be 20,000 tons per year, with potential expansions as demand increases.

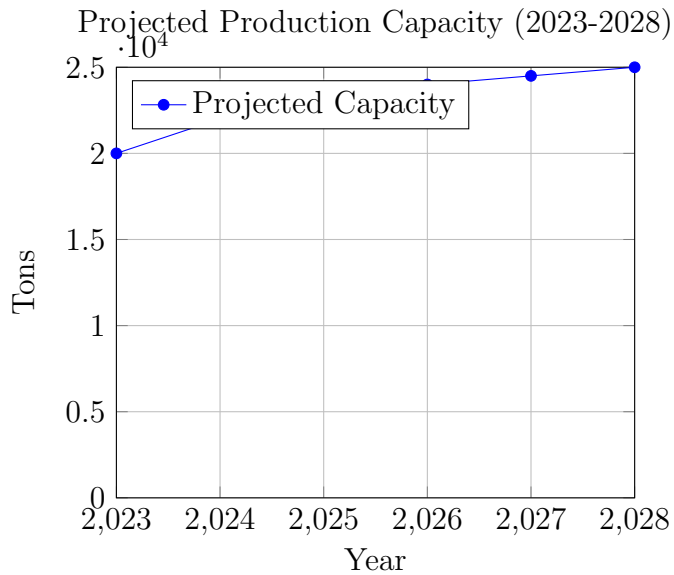

## 5 Sustainability Initiatives

In line with Great Pasta's commitment to sustainability, the Montreal plant will implement eco-friendly practices. This includes the use of renewable energy sources, efficient water usage, and waste reduction strategies. The goal is to minimize the environmental impact while maximizing production efficiency.

### 5.1 Sourcing Ingredients

The plant will prioritize sourcing ingredients locally, supporting Canadian farmers and reducing transportation emissions. This approach not only enhances the quality of our products but also contributes to the local agricultural economy.

## 6 Community Engagement

Great Pasta is committed to engaging with the Montreal community. We plan to hold workshops and events to educate consumers about the benefits of pasta and cooking with high-quality ingredients. Additionally, we aim to partner with local schools to promote healthy eating habits among children.

## 7 Conclusion

The opening of the new pasta plant in Montreal is a significant milestone for Great Pasta, reflecting our ongoing dedication to providing the best pasta in the world. As

we embark on this journey, we are excited about the opportunities it will create for local employment, economic growth, and community engagement. Through sustainable practices and a commitment to quality, we look forward to serving our customers with excellence.

## 8 Future Prospects

As we project into the future, the potential for further expansion in the North American market remains vast. With the growing interest in Italian cuisine and the increasing demand for high-quality pasta, Great Pasta is poised to lead in this sector.

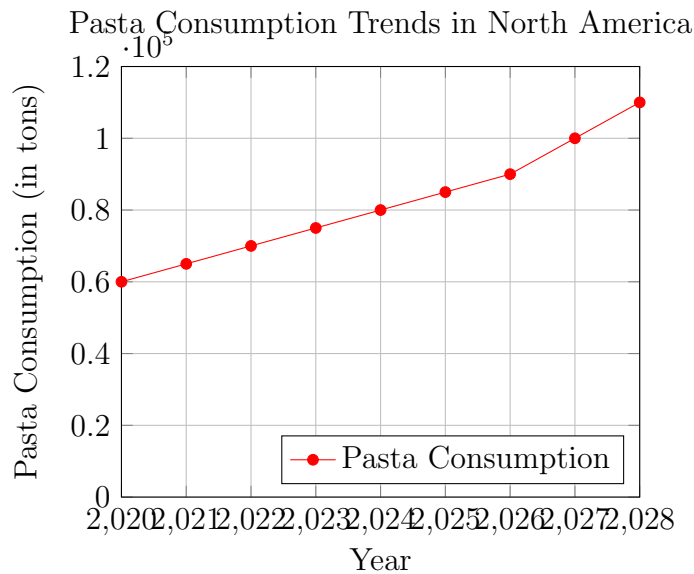

Supplement: supplementary_material [file Montreal_Pasta_Plant_Announcement.pdf › services/drbench_tools/src/data/users/susan.smith/nextcloud/Reports/Training Materials/Montreal_Pasta_Plant_Announcement.pdf]
