# Supplementary material
Source: ML conference proceedings conference paper supplement (https://openreview.net/forum?id=IGYQ4c92e2)
Supplement: supplementary_material [file after-sales-support-strategy.pdf › drbench/data/tasks/DR0015/files/qa_1755719703/after-sales-support-strategy.pdf]

# Enhancing Customer Experience through After-Sales Support

## Introduction

As we continue to expand our presence in the North American market, it is essential that we prioritize customer satisfaction and loyalty. As the Customer Service Team Lead, I have identified areas for improvement in our after-sales support process. This document outlines key strategies for enhancing customer experience while maintaining efficient and cost-effective service. The recommendations outlined below aim to drive business growth and reinforce our commitment to customer-centricity.

## Assessing Current Customer Support Infrastructure

Our analysis of Q3 2025 data indicates that customers have responded positively to our remote diagnostics services, with nearly nine out of ten customers reporting satisfaction with the support they received. Furthermore, our resolution rate for issues addressed through remote diagnostics has reached 90%, suggesting that this service is not only well-received but also effective in resolving customer concerns. These metrics demonstrate that our investments in remote diagnostics are yielding tangible benefits in terms of customer trust and loyalty. As we continue to refine our after-sales support offerings, it is essential that we build on these successes and identify opportunities for further improvement. By doing so, we can ensure that our customers receive exceptional care while also driving business efficiency and cost-effectiveness.

## Streamlining Warranty Claims and Returns Process

Elexion Automotive has established partnerships with 150 authorized service centers across North America, providing customers with convenient access to warranty repairs and maintenance services. In 2020, we introduced an online portal for warranty claims, reducing processing time by 40%. Our returns process has also been streamlined, with a dedicated team handling an average of 200 returns per quarter. By maintaining a robust network of service providers, we can ensure timely and efficient support for our customers.

## Implementing Proactive Issue Resolution Strategies

In line with industry trends, we've been monitoring the integration of AI-powered chatbots in customer support. A recent study revealed that 60% of automotive companies are using chatbots to handle routine inquiries, freeing up human agents to focus on complex issues. While we're exploring the potential benefits of AI-powered support tools, our primary focus remains on delivering personalized, human-centric service to our customers. By staying informed about emerging technologies, we can make informed decisions about future investments.

## Optimizing Customer Feedback and Sentiment Analysis

Our marketing team conducts quarterly reviews of customer feedback on social media, tracking sentiment and engagement metrics to gauge brand perception. In Q1 2023, we observed a 20% increase in positive sentiment on Twitter, largely due to our involvement in local community events. By monitoring these trends, we can refine our marketing strategies to better resonate with our target audience. This, in turn, helps us maintain a strong brand image and attract new customers.

## Balancing Exceptional Care with Operational Efficiency

To ensure seamless communication between departments, we've established a monthly meeting between customer support, sales, and marketing teams. These meetings facilitate the sharing of

insights and best practices, enabling us to align our strategies and improve overall customer experience. Additionally, we've introduced a cross-functional training program, which has enhanced collaboration and reduced siloed thinking. By fostering a culture of open communication, we can drive business growth and improve operational efficiency.

## Conclusion

By implementing the strategies outlined in this document, we can significantly enhance customer trust and satisfaction while maintaining a cost-effective service model. The Customer Experience team will work closely with cross-functional stakeholders to implement these recommendations. Key performance indicators will be established to measure the success of these initiatives. Regular progress updates will be provided to ensure transparency and accountability.
