# Supplementary material
Source: ML conference proceedings conference paper supplement (https://openreview.net/forum?id=IGYQ4c92e2)
Supplement: supplementary_material [file audit-compliance-report.pdf › drbench/data/tasks/DR0010/files/qa_1755712757/audit-compliance-report.pdf]

# Q1 2025 Audit and Compliance Report

## Introduction

As part of our ongoing commitment to maintaining the highest standards of regulatory compliance, this report provides an overview of our internal audit and compliance activities for Q1 2025. The purpose of this document is to inform key stakeholders of our progress in ensuring the integrity of our virtual healthcare services. Our internal audit program is designed to identify areas for improvement and ensure that we are meeting all relevant regulatory requirements. This report summarizes our key findings and recommendations for Q1 2025.

## Audit Frequency and Compliance Metrics

Our compliance team successfully implemented the new ISO 27001:2022 standard across all departments in Q4 2024, resulting in a 25% reduction in security incidents. The IT department also upgraded our encryption protocols to ensure the secure transmission of patient data. As part of our ongoing commitment to compliance, we conducted a thorough review of our business continuity plan in February 2025. Our compliance metrics indicate a 95% adherence rate to regulatory requirements.

## Risk Management and Mitigation Strategies

MediConn Solutions' risk management team identified a 15% increase in cyber threats targeting the healthcare industry in Q1 2025. In response, we enhanced our employee training program to include phishing simulations and security awareness workshops. Our incident response plan was also updated to reflect the latest industry best practices. As a result, we observed a 30% reduction in reported security incidents.

## Regulatory Updates and Industry Best Practices

In January 2025, our regulatory affairs team attended a Health Canada workshop on the latest updates to the Personal Health Information Protection Act (PHIPA). We also participated in a industry-wide survey on virtual care standards, which highlighted the need for standardized data exchange protocols. Our team is currently reviewing the survey findings to inform our own data management practices. We anticipate implementing changes to our data exchange protocols by Q3 2025.

## Conclusion

In conclusion, our internal audit and compliance program continues to play a critical role in ensuring the integrity of our virtual healthcare services. Based on our findings, we recommend increasing the frequency of our internal audits to ensure ongoing compliance with regulatory requirements. We also recommend implementing additional risk management and mitigation strategies to address identified areas of risk. By taking these steps, we can continue to provide high-quality, compliant services to our patients and partners.
