# Supplementary material
Source: ML conference proceedings conference paper supplement (https://openreview.net/forum?id=IGYQ4c92e2)
Supplement: supplementary_material [file benefits-expense-report.pdf › drbench/data/tasks/DR0007/files/qa_1755702293/benefits-expense-report.pdf]

# Q3 2025 Employee Benefits Expense Analysis Report

## Introduction

As we continue to navigate the complexities of virtual healthcare, it's essential to monitor our internal expenditures to ensure alignment with our company's financial goals. This report aims to provide a comprehensive overview of our employee benefits expenses for Q3 2025. By examining our spending patterns, we can identify areas for optimization and make informed decisions about our benefits programs. This analysis will help us better understand our financial performance and make strategic recommendations for future improvements.

## Employee Benefits Program Overview and Objectives

MediConn Solutions' employee benefits program aims to foster a culture of well-being, supporting our staff's physical and mental health. Launched in Q2 2023, our comprehensive benefits package includes access to virtual fitness classes, mental health workshops, and on-site health screenings. As of January 2025, 85% of our employees have participated in at least one wellness initiative, with a notable increase in employee satisfaction ratings. By investing in our employees' well-being, we aim to reduce turnover rates and improve overall job satisfaction.

## Q3 2025 Employee Demographics and Benefits Enrollment

In Q3 2025, our employee demographics shifted with the onboarding of 25 new staff members, primarily in the software development department. This influx of new talent led to an increase in benefits enrollment, with 92% of new hires opting into our comprehensive benefits package. Notably, our employee retention rate for Q3 2025 was 90%, a 5% increase from the same period in 2024. Our HR team continues to monitor and adapt our benefits program to meet the evolving needs of our growing workforce.

## Expense Allocation and Budget Variance Analysis

In preparation for the 2026 fiscal year, our finance team conducted a thorough review of our operational expenses, identifying areas for cost optimization. We allocated 3% of our annual budget to upgrade our accounting software, streamlining our financial reporting processes and improving budget variance analysis. This investment is expected to yield a 10% reduction in administrative costs over the next 12 months. Our finance team will continue to monitor and refine our expense allocation strategy to ensure alignment with business objectives.

## Comparative Analysis of Industry Benefits Standards

According to a recent industry report, 75% of Canadian healthcare companies offer flexible work arrangements as part of their benefits package. In comparison, 90% of our employees take advantage of our flexible work policy, citing improved work-life balance and increased productivity. As we continue to navigate the evolving landscape of virtual healthcare, our HR team will conduct regular reviews of industry benefits standards to ensure our program remains competitive and aligned with best practices.

## Benefits Expenditure and ROI Performance Metrics

To measure the effectiveness of our employee benefits program, we track key performance metrics such as employee satisfaction, retention rates, and productivity levels. In Q2 2025, we introduced a new ROI analysis framework to assess the financial impact of our benefits program on business outcomes. Preliminary results indicate a positive correlation between benefits expenditure and

employee retention, with a 12% increase in productivity levels among employees participating in our wellness initiatives.

## Conclusion

In conclusion, this report highlights key trends and insights in our Q3 2025 employee benefits expenses. By analyzing our spending patterns and comparing them to industry standards, we can optimize our benefits programs to better align with our company's financial goals. Recommendations for future improvements will be presented in a subsequent report. These findings will inform our strategic planning and ensure we continue to provide competitive benefits to our employees while maintaining fiscal responsibility.
