# Supplementary material
Source: ML conference proceedings conference paper supplement (https://openreview.net/forum?id=IGYQ4c92e2)
Supplement: supplementary_material [file benefits-report-q3.pdf › drbench/data/tasks/DR0015/files/qa_1755719789/benefits-report-q3.pdf]

# Q3 2025 Employee Benefits Analysis Report

## Introduction

As we continue to prioritize employee well-being and retention, it is essential to regularly assess the effectiveness of our benefits offerings. This report aims to provide an overview of key trends and insights related to employee benefits for Q3 2025. The analysis will inform our future benefits strategy and ensure alignment with the company's overall goals. By examining various aspects of our benefits program, we can identify areas for improvement and optimize our offerings to meet the evolving needs of our workforce.

## Benefits Administration Process Review and Recommendations

Our current benefits administration process has been in place since Q1 2023 and involves a multi-step review of employee eligibility. The HR department conducts a bi-annual audit to ensure compliance with regulatory requirements. As of Q2 2025, we've implemented a new software system to streamline benefits enrollment, resulting in a 25% reduction in processing time. Future recommendations include integrating AI-powered chatbots to enhance employee support.

## Employee Engagement and Satisfaction Survey Results

The Q2 2025 employee engagement survey revealed a 10% increase in overall job satisfaction among Elexion Automotive employees. The survey also highlighted the importance of professional development opportunities, with 80% of respondents indicating a desire for more training programs. Our HR department is working to address these concerns through the implementation of a new mentorship initiative. A follow-up survey is scheduled for Q1 2026 to assess the effectiveness of these efforts.

## Q3 2025 Employee Benefits Enrollment Rate Analysis

The analysis of our employee demographics revealed a significant shift towards a more diverse workforce, with a 15% increase in employees under the age of 30. This trend is expected to continue, with projections indicating a 20% increase in the next 12 months. As a result, we're exploring benefits options that cater to the needs of a younger workforce, such as student loan repayment programs. Our research indicates that 60% of competitors in the electric vehicle industry offer similar benefits.

## Market Benchmarking of Electric Vehicle Industry Benefits

A review of industry benchmarks revealed that 75% of electric vehicle manufacturers offer on-site fitness classes as part of their benefits package. In response, we're launching a pilot program to provide yoga classes at our headquarters, with plans to expand to other locations in Q2 2026. This initiative aims to promote employee wellness and reduce healthcare costs. We're also exploring partnerships with local gyms to offer discounted memberships.

## Strategic Planning for Benefits Program Enhancements

Our strategic planning process involves a comprehensive review of benefits program data, including employee feedback and market trends. In Q1 2025, we established a benefits advisory committee to provide recommendations on program enhancements. The committee meets quarterly to discuss initiatives, such as the implementation of a flexible work arrangement policy, which is expected to launch in Q3 2026. We're also exploring the use of data analytics to inform benefits decisions.

## Conclusion

In conclusion, the analysis presented in this report highlights key trends and insights related to employee benefits for Q3 2025. Based on the findings, we recommend refining our benefits administration process and exploring opportunities for program enhancements. By prioritizing employee well-being and investing in a competitive benefits program, we can drive business success and maintain our position as a leader in the electric vehicle industry. Next steps will involve presenting these recommendations to the executive team and developing a strategic plan for implementation.
