# Supplementary material
Source: ML conference proceedings conference paper supplement (https://openreview.net/forum?id=IGYQ4c92e2)
Supplement: supplementary_material [file centennial-experience-enhancement.pdf › drbench/data/tasks/DR0005/files/IN002_pdf/centennial-experience-enhancement.pdf]

# Enhancing Centennial Shopper Experience at Lee's Market

## Introduction

As Lee's Market continues to expand its presence across North America, understanding and enhancing the consumer experience is critical. This document explores innovative approaches to improving customer service for centennial shoppers. By leveraging technology and refining service standards, we aim to enhance satisfaction and loyalty among this key demographic. The insights provided will guide strategic decisions in optimizing our customer service operations.

## Leveraging Technology for Customer Engagement

Lee's Market has implemented augmented reality (AR) applications to enhance in-store experiences, with a 20% uptick in AR feature usage in 2023. These applications allow customers to visualize products in their homes before purchase. The technology team reports a 30% increase in app downloads following the AR launch. This approach aligns with the company's digital transformation goals.

## Optimizing In-Store Experience for Young Consumers

In 2023, Lee's Market enhanced its in-store navigation system, resulting in a 25% reduction in customer service inquiries. The system includes digital kiosks and interactive maps tailored to young consumers' tech preferences. Feedback from a recent survey shows 68% satisfaction with the updated layout. These improvements aim to streamline the shopping journey for millennials.

## Enhancing Digital Touchpoints with Chatbots

Lee's Market's website saw a 40% increase in traffic in the first quarter of 2023, primarily from mobile users. The digital marketing team noted that 78% of visitors accessed product reviews and ratings. This emphasis on peer feedback and product information highlights the need to refine digital content strategies. The focus remains on enhancing the website's interactive features.

## Evaluating Customer Feedback for Continuous Improvement

In 2022, feedback analysis revealed that 64% of customers preferred personalized email promotions. The marketing department responded by launching targeted campaigns, resulting in a 22% increase in click-through rates. This data-driven approach underscores the importance of aligning promotional strategies with customer preferences. Continuous feedback evaluation remains a priority for marketing refinement.

## Current Trends in Centennial Shopping Behavior

Recent shifts in millennial shopping preferences indicate a growing acceptance of AI-driven interactions, with chatbots playing a pivotal role in enhancing customer engagement. Lee's Market anticipates a significant 25% reduction in customer service expenses by the second quarter of 2024 due to the integration of chatbot technologies. This cost efficiency not only streamlines operations but also provides an opportunity to reinvest savings into tailored experiences for young consumers who prioritize immediacy and personalization. As millennials increasingly seek seamless and responsive support, leveraging chatbots is essential to meet these expectations and foster brand loyalty.

## Conclusion

By integrating chatbots into our customer service strategy, Lee's Market can significantly improve engagement with centennial shoppers. This document highlights the importance of understanding young consumer behaviors and adapting our services to meet their expectations. Implementing these insights will allow us to stay competitive and strengthen our market position. Next steps involve piloting chatbot solutions and evaluating their impact on customer satisfaction.
