# Supplementary material
Source: ML conference proceedings conference paper supplement (https://openreview.net/forum?id=IGYQ4c92e2)
Supplement: supplementary_material [file centennial-shopper-experience.pdf › drbench/data/tasks/DR0005/files/IN004_pdf/centennial-shopper-experience.pdf]

# Enhancing Centennial Shopper Experience with Technology

## Introduction

As Lee's Market continues to expand its footprint in urban centers, our customer service operations must evolve to meet the changing needs of our target audience. Centennial shoppers, in particular, present a unique opportunity for growth and engagement. This report explores strategies for enhancing their shopping experience through technology and process improvements. By investing in the right tools and approaches, we can increase customer loyalty and drive business growth.

## Assessing the Effectiveness of Current Service Channels

In 2022, our customer service department handled an average of 500 customer inquiries per week via phone and email, with a resolution rate of 90% within the first 24 hours. To improve our response times, we have introduced a new ticketing system that enables our customer service representatives to prioritize and manage inquiries more efficiently. As part of our ongoing efforts to enhance customer satisfaction, we have also established a dedicated feedback channel for customers to provide suggestions on our services. This feedback is reviewed quarterly by our customer service team to identify areas for improvement.

## Leveraging Automation to Improve Response Times

In our efforts to streamline our supply chain operations, we have implemented an automated inventory tracking system that enables real-time monitoring of stock levels and reduces manual data entry by 30%. This system has also improved our ability to forecast demand and adjust our inventory accordingly, resulting in a 10% reduction in stockouts and overstocking. Furthermore, our logistics team has optimized our delivery routes using machine learning algorithms, leading to a 15% decrease in fuel consumption and a 5% reduction in delivery times.

## Implementing Personalized Recommendations for Enhanced Engagement

Our loyalty program, launched in 2020, has seen a steady increase in membership, with over 100,000 customers currently enrolled. To reward our loyal customers, we offer exclusive discounts and promotions tailored to their shopping habits. Our marketing team has also developed targeted campaigns to promote new products and services to our loyalty program members, resulting in a 20% increase in sales among this group. Additionally, we have partnered with several Asian food brands to offer co-branded promotions and products.

## Measuring the Impact of Technology on Customer Satisfaction

In our annual IT budget review, we allocated 25% of our budget to upgrading our point-of-sale systems to improve transaction efficiency and reduce checkout times. This upgrade has resulted in a 12% decrease in customer complaints related to checkout issues. Furthermore, our IT department has implemented enhanced security measures to protect customer data, including encryption and secure payment processing. These measures have ensured compliance with industry standards and regulations, such as PCI-DSS.

## Understanding Centennial Shopper Preferences and Behaviors

Our analysis suggests that by Q3 2025, approximately half of our centennial customer base will engage with our chatbot services on a weekly basis. This trend indicates a significant shift in their

preferences, favoring instant, AI-powered support for quick inquiries and issue resolution. To effectively cater to this demographic, we must prioritize the development of personalized chatbot experiences that not only meet but exceed their expectations. By doing so, we can enhance their overall shopping experience, foster loyalty, and drive business growth. As we continue to invest in conversational AI technologies, it is essential to monitor and adapt to the evolving needs and behaviors of our centennial shoppers.

## **Conclusion**

To remain competitive in the market, Lee's Market must prioritize the development of technology-enabled solutions that cater to the needs of centennial shoppers. By implementing personalized recommendations, automating routine inquiries, and measuring the impact of these initiatives, we can significantly enhance the shopping experience and drive business growth. The next steps will involve collaborating with the IT department to develop a roadmap for implementation and establishing key performance indicators to measure success. With a strategic approach to technology adoption, we can reinforce our position as a leader in the Asian supermarket chain industry.
