# Supplementary material
Source: ML conference proceedings conference paper supplement (https://openreview.net/forum?id=IGYQ4c92e2)
Supplement: supplementary_material [file chatbot-enhancement-report.pdf › drbench/data/tasks/DR0005/files/IN003_pdf/chatbot-enhancement-report.pdf]

# Enhancing Centennial Shopper Experience with Chatbots

## Introduction

As Lee's Market continues to expand its presence across the U.S. and Canada, enhancing the consumer experience remains a top priority, particularly for centennial shoppers. This document explores strategic opportunities to integrate innovative technologies within our customer service framework. By leveraging insights from industry trends and customer feedback, we aim to improve engagement and satisfaction levels. This report outlines potential advancements and the role of chatbots in transforming customer interactions.

## Current Trends in Retail Technology

In the evolving landscape of retail technology, the integration of AI chatbots has become increasingly significant, particularly in enhancing user experience for younger demographics. At Lee's Market, the deployment of chatbots is projected to elevate customer satisfaction among centennial shoppers by 15% by the second quarter of 2024. This improvement underscores the successful adaptation of chatbots in addressing the demand for quick, efficient service. By leveraging these technologies, Lee's Market not only aligns with industry trends but also strategically positions itself to better meet the expectations of modern consumers.

## Chatbot Integration Strategies in Retail

Retailers have been exploring chatbot integration for internal communications, improving employee training processes by 20% since 2020. These chatbots assist in streamlining onboarding and providing instant access to policy information. Additionally, 65% of retailers reported reduced training times due to automated FAQs. Lee's Market uses chatbots to disseminate HR updates effectively, enhancing workforce efficiency.

## Understanding Centennial Shopper Preferences

Studies from 2021 indicate that centennial shoppers prioritize sustainability, with 74% willing to pay more for eco-friendly products. Lee's Market has responded by expanding its range of organic and sustainably-sourced items by 30% over two years. This shift aligns with the broader retail move towards green practices. Efforts include reducing single-use plastics by 40% across stores.

## Enhancing Multichannel Customer Engagement

In 2023, Lee's Market increased its social media team by 50% to boost online interactions, leading to a 25% rise in engagement metrics. This expansion included launching targeted campaigns on emerging platforms like TikTok, reaching younger demographics effectively. The initiative has resulted in a 15% increase in e-commerce traffic, suggesting successful multichannel integration. However, the primary focus remains on enhancing brand visibility and interaction.

## Operational Efficiency through AI Solutions

Lee's Market implemented AI-driven inventory management in 2022, reducing stockouts by 18% and improving restocking efficiency by 25%. This system analyzes sales data to predict demand more accurately, optimizing supply chain operations. By 2023, the company reported a 12% increase in inventory turnover, demonstrating enhanced operational efficiency. The focus remains on internal supply chain improvements rather than consumer interactions.

# Conclusion

In conclusion, integrating chatbots into our customer service operations presents a promising avenue to enhance the centennial shopper experience. By aligning these technologies with our existing customer engagement strategies, we can offer timely and personalized support. Moving forward, it is essential to pilot chatbot solutions and closely monitor their impact on customer satisfaction. This approach will help ensure that Lee's Market remains at the forefront of retail innovation while catering to the evolving needs of our diverse customer base.
