# Supplementary material
Source: ML conference proceedings conference paper supplement (https://openreview.net/forum?id=IGYQ4c92e2)
Supplement: supplementary_material [file Chatbot-Integration-Strategy.docx]

# Chatbot Integration Strategy Report

## Introduction

As the Customer Service Manager, I'm tasked with identifying opportunities to enhance the customer experience. Lee's Market's growing presence in urban centers presents a prime chance to leverage technology to improve our service standards.

## Service Standard Development

Our customer service team has been working on a new set of service standards for our online support channels. These standards will ensure consistent communication and resolution of customer issues. We're aiming to roll out these standards across all our digital channels by Q2 next year.

## Digital Channel Strategies

We've been exploring ways to enhance our mobile app experience, including the addition of new features and improved navigation. Our research suggests that 75% of customers use our app to browse products, but only 30% make purchases through the app. We're considering introducing personalized product recommendations to increase conversion rates.

## Operational Efficiency Measures

Our logistics team has implemented a new inventory management system, which has resulted in a 10% reduction in storage costs. We're considering expanding this system to our other distribution centers to achieve further efficiencies.

## Customer Feedback Analysis

Our analysis of customer feedback reveals that we receive an average of 2,500 inquiries from centennial shoppers per quarter, highlighting the need for efficient and personalized support. This valuable insight enables us to assess the feasibility of leveraging chatbots to enhance the consumer experience, providing instant responses and saving time. Furthermore, this data underscores the importance of developing targeted customer service strategies to cater to the unique needs of this demographic.

## Technology Adoption Roadmap

We're currently reviewing our technology roadmap for the next 18 months. This includes assessing the feasibility of implementing a new enterprise resource planning system to streamline our operations. We're aiming to have a more detailed plan in place by the end of Q1 next year.

## Implementation Plan

Our implementation plan for our new customer loyalty program is on track, with a projected rollout date of Q3 next year. We're expecting a significant increase in customer engagement and retention as a result of this program.

## Pilot Program Insights

Our pilot program for our new e-commerce platform has provided valuable insights into customer behavior and purchasing habits. We're considering applying these insights to our in-store experience to enhance the overall customer journey.

## Conclusion

By adopting a chatbot integration strategy, we can not only streamline customer inquiries but also provide a more personalized experience. Next steps should focus on piloting this technology and refining our implementation plan.
