# Supplementary material
Source: ML conference proceedings conference paper supplement (https://openreview.net/forum?id=IGYQ4c92e2)
Supplement: supplementary_material [file compliance-report-ev.pdf › drbench/data/tasks/DR0011/files/qa_1755633171/compliance-report-ev.pdf]

# Navigating Compliance in Electric Vehicle Production

## Introduction

This document outlines key considerations for balancing battery durability and warranty guarantees in compliance with evolving regulations. As a Product Compliance Engineer at Elexion Automotive, my role involves ensuring our products meet industry standards while adhering to production timelines. This report highlights critical areas of focus that align with our strategic objectives. It is intended to inform stakeholders of the regulatory landscape and potential impacts on our electric vehicle offerings.

## Current Regulatory Landscape Overview

The evolving regulatory environment, particularly California's Advanced Clean Cars II (ACC II) regulations, is significantly impacting our compliance strategies for battery durability. As we aim to meet these stringent requirements, we anticipate a financial increase of approximately \$15 million by the first quarter of 2026 to ensure our electric vehicles adhere to new performance standards. This investment is critical not only for regulatory compliance but also for maintaining consumer confidence in our products as we align with the industry's shift towards sustainability. Balancing these costs while adhering to our production timelines is essential for our strategic objectives through 2035.

## Durability Standards and Testing Protocols

Durability standards in the automotive sector have evolved significantly, particularly with the integration of advanced materials in vehicle design. In 2022, Elexion Automotive implemented new testing protocols that assess the long-term performance of vehicle components under various environmental conditions. Such protocols include accelerated aging tests that simulate years of wear and tear within a few months. This rigorous approach not only aids in product development but also enhances the overall reliability of vehicles, ensuring they meet consumer expectations for durability.

## Warranty Implications for Battery Performance

Warranty policies play a crucial role in shaping customer perceptions of vehicle reliability and brand trust. Elexion Automotive has historically offered warranties that cover various components, including powertrains and electrical systems, to instill confidence among buyers. In 2023, approximately 25% of customers opted for extended warranties, highlighting the demand for greater assurance in vehicle performance. By analyzing warranty claim data, the company can identify trends that inform future product offerings and service enhancements.

## Conclusion

In summary, addressing the regulatory landscape and durability standards is essential for our electric vehicle production. The insights provided will guide our compliance strategies and help mitigate risks associated with ACC II regulations. Moving forward, collaboration with design teams and regulatory bodies will be crucial. I recommend we establish a task force to monitor changes and adapt our compliance documentation accordingly.
