# Supplementary material
Source: ML conference proceedings conference paper supplement (https://openreview.net/forum?id=IGYQ4c92e2)
Supplement: supplementary_material [file crm-innovation-report.pdf › drbench/data/tasks/DR0009/files/qa_1755704057/crm-innovation-report.pdf]

# Enhancing Patient Engagement through CRM Innovation

## Introduction

As we continue to expand our virtual healthcare services, it's essential that we prioritize patient engagement and retention. This document aims to explore the potential of leveraging trendy new CRM solutions to drive business growth. By staying ahead of the curve, we can solidify our position as a leader in the Canadian virtual healthcare market. The following sections outline key considerations and recommendations for our sales strategy.

## Optimizing Sales Outreach through Data-Driven Insights

Our sales analytics team has been refining our lead scoring model to better prioritize high-value opportunities. By analyzing customer engagement metrics, such as platform usage and response rates, we've been able to increase our sales conversion rates by 8% over the past quarter. This data-driven approach has also enabled us to identify key decision-making factors for our target customer segments. Moving forward, we'll continue to iterate on our sales strategy to optimize results.

## Trends in Patient-Centric CRM Design

Our analysis suggests that by incorporating AI-driven personalization into our CRM, we can anticipate a significant boost in patient retention. By Q3 2025, we expect to see an additional 50,000 patients retained through this approach, underscoring the value of investing in cutting-edge CRM solutions. This projection is aligned with the growing demand for personalized care management and the increasing adoption of digital health solutions. As we continue to prioritize patient-centric design in our CRM, we are poised to drive meaningful improvements in patient engagement and retention, ultimately enhancing our competitive edge in the virtual healthcare market.

## Emerging CRM Technologies for Enhanced Patient Retention

As part of our ongoing efforts to enhance operational efficiency, our IT department has been conducting a thorough review of our internal software infrastructure. This assessment has revealed opportunities for cost savings and process improvements through the implementation of new project management tools. By streamlining our internal workflows, we expect to reduce our average customer onboarding time by 20% and free up additional resources for strategic initiatives.

## Conclusion

In conclusion, embracing innovative CRM solutions can significantly enhance our patient engagement and retention efforts. By leveraging data-driven insights and staying up-to-date on emerging technologies, we can tailor our sales strategy to meet the evolving needs of our patients. I recommend that we conduct further research on the CRM solutions expected to emerge in 2025 and assess their potential for integration into our existing systems. By doing so, we can drive business growth and maintain our competitive edge in the virtual healthcare market.
