# Supplementary material
Source: ML conference proceedings conference paper supplement (https://openreview.net/forum?id=IGYQ4c92e2)
Supplement: supplementary_material [file crm-patient-engagement-report.pdf › drbench/data/tasks/DR0009/files/qa_1755704344/crm-patient-engagement-report.pdf]

# Enhancing Patient Engagement through CRM Innovation

## Introduction

As we continue to expand our virtual healthcare services, it is crucial that we prioritize patient engagement and retention. This document aims to explore the role of CRM solutions in achieving this goal. By leveraging the latest trends and technologies, we can improve patient satisfaction and drive business growth. The following sections will outline key considerations and recommendations for our sales team.

## Trends in Personalized Patient Communication Strategies

As we continue to invest in cutting-edge cloud-based CRM solutions, our financial projections indicate a significant return on investment. By Q4 2025, we anticipate a 25% ROI on these solutions, driven by improved patient engagement, enhanced operational efficiency, and reduced costs. This expected return will enable us to further enhance our virtual healthcare services, expand our reach, and solidify our position in the Canadian market. With a strong focus on AI-driven personalization and automation, our cloud-based CRM solutions will play a pivotal role in driving business growth and delivering exceptional patient experiences.

## Evaluating Emerging CRM Solutions for Healthcare

To ensure seamless integration with our existing infrastructure, our IT department conducts rigorous testing and evaluation of all new software solutions, including CRM systems. This involves a thorough review of security protocols, data storage, and user interface. In the past year, we've assessed over 15 different solutions, with only 3 meeting our stringent requirements. Our comprehensive evaluation process ensures that any new system aligns with our company's values and priorities.

## Best Practices for Implementing Patient-Centric CRM Systems

As part of our ongoing commitment to staff development, our training department has created a comprehensive onboarding program for new hires, focusing on the importance of patient-centric care and effective CRM system utilization. Since its introduction in January 2022, we've seen a significant reduction in errors and a notable increase in staff confidence when interacting with patients. By investing in our team members, we're able to provide exceptional care and support to our patients.

## Conclusion

In conclusion, our research suggests that investing in cutting-edge CRM solutions can significantly enhance patient engagement and retention. By implementing personalized communication strategies and leveraging emerging technologies, we can improve patient satisfaction and drive revenue growth. The sales team is recommended to explore these opportunities further and develop a comprehensive plan for implementation. Next steps will involve presenting our findings to the leadership team and securing necessary resources.
