# Supplementary material
Source: ML conference proceedings conference paper supplement (https://openreview.net/forum?id=IGYQ4c92e2)
Supplement: supplementary_material [file culinary_journey_pasta_making.pdf › services/drbench_tools/src/data/users/susan.smith/nextcloud/Documents/Templates/culinary_journey_pasta_making.pdf]

# A Culinary Journey: The Art of Pasta Making

John Doe

October 2023

## 1 Introduction

Great Pasta, a hallmark in the world of Italian cuisine since 1895, has been dedicated to crafting the finest pasta. With headquarters in Rome, the company employs over 25,000 people who share a passion for quality and authenticity. This document serves as a template for internal training sessions that aim to educate employees on the art and science of pasta making.

## 2 The Importance of Quality Ingredients

The foundation of great pasta lies in its ingredients. Great Pasta sources durum wheat from the best farms across Italy. Recent studies show that pasta made from high-quality semolina can enhance texture and flavor. For example, a survey conducted in 2022 indicated that 85% of chefs preferred artisanal pasta over mass-produced varieties.

## 3 Pasta Production Process

The production process at Great Pasta is a blend of traditional techniques and modern technology. The steps include:

- Mixing: Combining semolina with water in precise ratios.
- Extrusion: Shaping the pasta using bronze dies for texture.
- Drying: A slow, temperature-controlled process that preserves flavor.

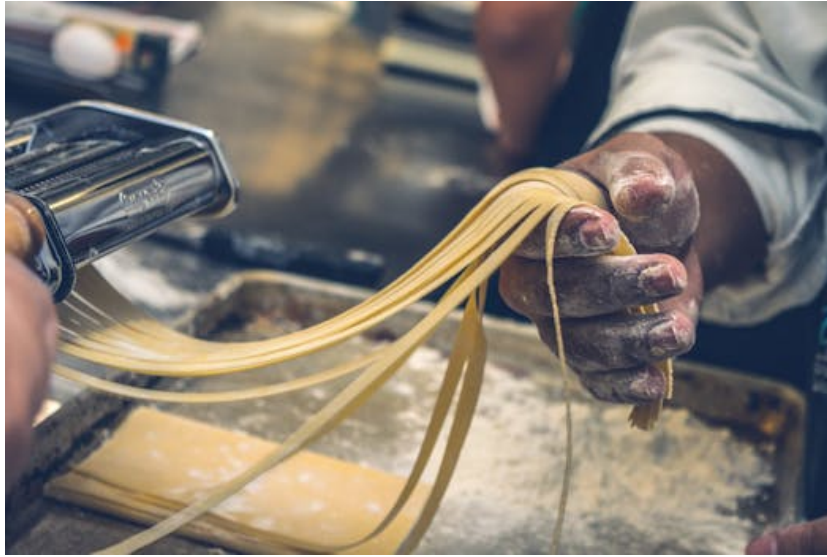

Figure 1: Fresh ingredients used in pasta making.

## 4 Visualizing Production Efficiency

To illustrate the efficiency of our production process, we present the following chart depicting production rates over the last year. As shown in Figure ??, efficiency has improved steadily due to the recent implementation of automated systems.

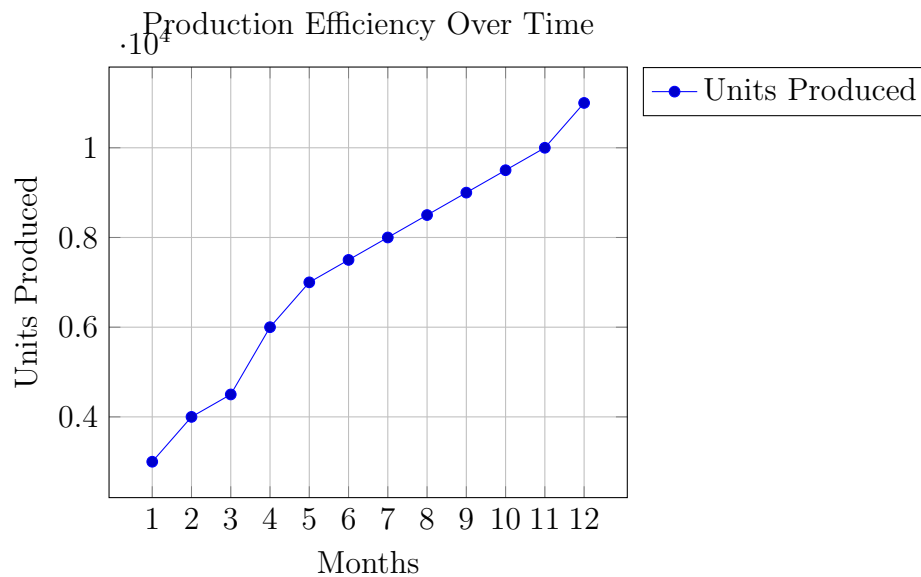

## 5 Conclusion

Great Pasta's commitment to quality and efficiency is evident in every step of the production process. By educating our employees through structured training sessions, we ensure that our rich heritage continues to thrive in the modern culinary landscape.

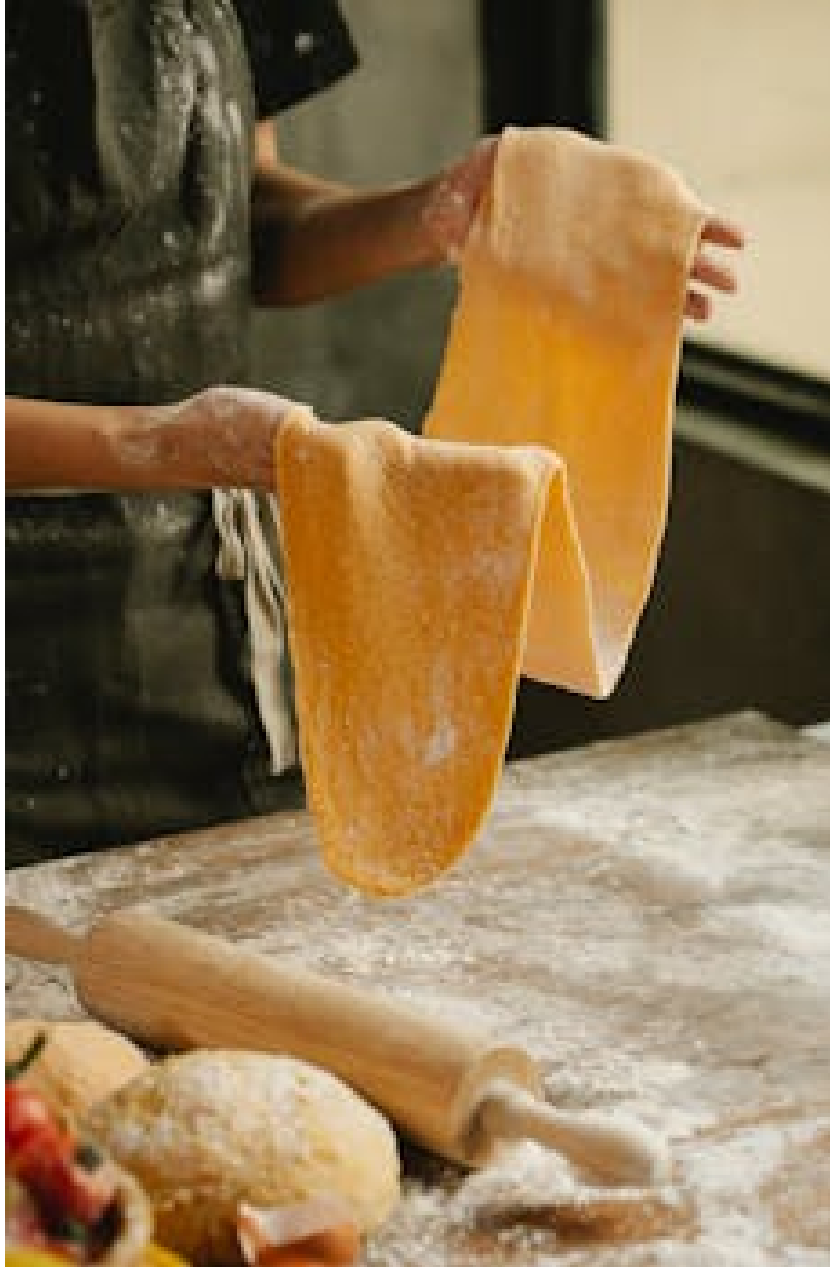

Figure 2: Artisan pasta being shaped by hand.

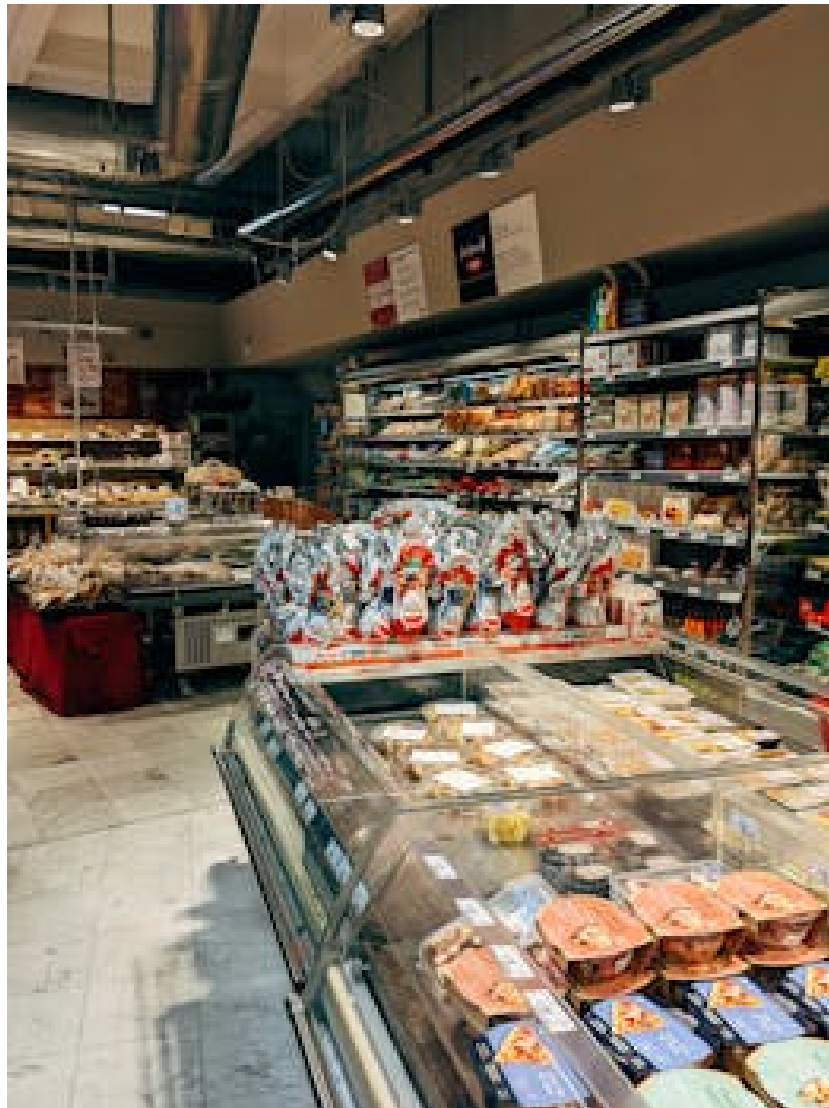

Figure 3: A variety of pasta products ready for distribution.
