# Supplementary material
Source: ML conference proceedings conference paper supplement (https://openreview.net/forum?id=IGYQ4c92e2)
Supplement: supplementary_material [file Customer-Experience-Chats-Report.docx]

# Optimizing Customer Experience Strategies

## Introduction

As Customer Service Manager, it is crucial to stay ahead of the curve in terms of innovative solutions to enhance the customer experience. With the rise of digital technologies, it is essential to explore opportunities to leverage these advancements to improve customer satisfaction. This report aims to investigate the potential of chatbots to improve the consumer experience for centennial shoppers, providing valuable insights for future strategies.

## Customer Feedback Analysis Framework

To improve customer feedback analysis, our team has been working on standardizing data collection methods and developing a more robust survey tool. We've also been exploring the use of natural language processing to categorize and prioritize customer complaints.

## Centennial Shoppers' Preferences Study

Our market research has shown that centennial shoppers are more likely to purchase organic products and shop online, with 35% of our online customers falling within this age group. We need to develop targeted marketing campaigns to attract this demographic.

## Chatbot Integration Opportunities

We're exploring opportunities to integrate our new loyalty program with our existing customer relationship management system. This will enable us to offer personalized promotions and improve customer engagement, but it's a complex project that requires careful planning.

## Chatbot Adoption Roadmap

Our analysis reveals that 45% of our centennial shoppers have engaged with our customer service team within the past six months. This finding underscores the significance of providing timely and effective support to this demographic. As we consider the potential benefits of chatbot adoption, it is crucial to understand the current level of customer engagement to inform the implementation and optimization of these technologies.

## Customer Experience Enhancement Strategies

To enhance the customer experience, we're implementing a new customer service training program for all store staff. This will ensure that our customers receive consistent, high-quality service across all locations. We're also piloting a new in-store navigation system to help customers find products more easily.

## Conclusion

In conclusion, the potential of chatbots to enhance the consumer experience for centennial shoppers is vast. By understanding their preferences and integrating chatbots into our services, we can significantly improve customer satisfaction. To achieve this, we must develop a comprehensive roadmap for chatbot adoption and a framework for analyzing customer feedback. This report provides a solid foundation for future strategies, and I recommend that we prioritize the implementation of chatbot technology to improve customer experience.
