# Supplementary material
Source: ML conference proceedings conference paper supplement (https://openreview.net/forum?id=IGYQ4c92e2)
Supplement: supplementary_material [file customer-experience-report.pdf › drbench/data/tasks/DR0015/files/qa_1755719413/customer-experience-report.pdf]

# Elevating Customer Experience through After-Sales Support

## Introduction

As Elexion Automotive continues to grow its market share in the North American electric vehicle market, it is essential that we prioritize customer trust and satisfaction. The Customer Experience department plays a vital role in achieving this goal. This report aims to explore strategies for enhancing customer experience while maintaining efficient and cost-effective service. By analyzing our current processes and performance metrics, we can identify opportunities for improvement and implement changes that drive customer loyalty and retention.

## The Impact of Personalization on Customer Satisfaction

According to a recent study by our market research department, 80% of customers prefer personalized marketing offers. In light of this, our marketing team has developed targeted campaigns for our loyalty program members, resulting in a 15% increase in sales among this group between April and June 2023. These campaigns are designed to enhance customer engagement and encourage repeat business. The success of these efforts has prompted us to explore further personalization strategies in other areas of the business.

## Balancing Cost and Quality in After-Sales Support

Our procurement team has been working closely with suppliers to negotiate better prices for replacement parts, achieving an average cost reduction of 8% across our entire parts catalog as of March 2023. This initiative has allowed us to maintain our profit margins despite rising material costs. Furthermore, we've streamlined our inventory management processes to minimize waste and optimize stock levels, ensuring that we can meet customer demand without overstocking. These operational efficiencies have contributed significantly to our overall financial health.

## Assessing Current Customer Support Infrastructure

Our analysis of Q2 2024 data reveals a notable uptick in the adoption of remote diagnostics services among our customer base. Approximately four out of ten customers have leveraged this offering, representing a 25% increase in utilization. This trend suggests that our efforts to enhance proactive customer care are gaining traction. As we continue to invest in remote diagnostics capabilities, it is essential to ensure that our service infrastructure can accommodate growing demand while maintaining exceptional service quality. By doing so, we can foster increased customer trust and loyalty, ultimately driving long-term growth and retention.

## Leveraging Technology to Enhance Customer Engagement

We've recently integrated a new CRM system across all our departments, enabling seamless information sharing and a unified customer view. This integration, completed in February 2023, has significantly improved our sales team's ability to track customer interactions and tailor their approach accordingly. As a result, we've seen a 10% increase in successful upsells and cross-sells. Moreover, the CRM system's analytics capabilities have provided valuable insights into customer behavior, informing our broader business strategy.

## Performance Metrics for Measuring Customer Experience

Our quarterly customer satisfaction surveys have shown consistent improvement in overall satisfaction ratings, with a 4% increase in positive responses between Q1 and Q2 2023. We attribute this success

to our ongoing efforts to enhance the customer journey, including the introduction of a simplified return policy and extended warranty options. These surveys provide invaluable feedback, allowing us to identify areas for improvement and adjust our strategies accordingly. The insights gained have also informed our employee training programs, focusing on empathy and problem-solving skills.

## **Strategies for Effective Issue Escalation and Resolution**

We've established a dedicated team for managing and resolving customer complaints on social media platforms, ensuring timely and professional responses. This team, formed in November 2022, has successfully resolved 95% of issues within 24 hours, minimizing negative publicity and demonstrating our commitment to customer care. Additionally, we've developed a comprehensive guide for frontline staff on escalation procedures, emphasizing the importance of clear communication and empathy in de-escalating conflicts.

## **Conclusion**

In conclusion, our analysis highlights the importance of striking a balance between exceptional customer care and efficient service. By implementing targeted strategies and leveraging technology, we can enhance customer experience and drive loyalty. The recommendations outlined in this report provide a roadmap for improving our after-sales support and solidifying Elexion Automotive's position as a leader in the electric vehicle market. Next steps include presenting these findings to the executive team and collaborating with cross-functional stakeholders to implement changes.
