# Supplementary material
Source: ML conference proceedings conference paper supplement (https://openreview.net/forum?id=IGYQ4c92e2)
Supplement: supplementary_material [file customer-experience-review.pdf › drbench/data/tasks/DR0013/files/qa_1755714717/customer-experience-review.pdf]

# Q1 2024 Customer Experience Performance Review

## Introduction

As we continue to drive growth in the North American electric vehicle market, it is essential to prioritize customer satisfaction and loyalty. This report provides an overview of our customer experience performance in Q1 2024, highlighting key trends and areas for improvement. The insights presented in this document are based on a comprehensive analysis of customer feedback data and are intended to inform strategic decision-making across the organization. By focusing on customer-centric initiatives, we can further differentiate ourselves in a competitive market and achieve our business objectives.

## Customer Journey Mapping and Pain Point Analysis

In Q3 2023, our Customer Experience team conducted an in-depth analysis of 500 customer reviews to identify pain points in the vehicle purchasing process. This analysis revealed that 30% of customers experienced difficulty with financing options, while 25% reported confusion with vehicle feature customization. As a result, we implemented a new financing guide and updated our website to provide clearer information on vehicle features. These changes have streamlined our sales process and improved overall customer engagement.

## Q1 2024 Customer Satisfaction Rating and Trends

Our Marketing department launched a targeted social media campaign in Q1 2024 to promote the benefits of electric vehicle ownership, resulting in a 25% increase in followers across our social media platforms. This campaign also drove a significant spike in website traffic, with 10,000 new visitors in January alone. However, the campaign's impact on sales is still being assessed by our analytics team. Meanwhile, our customer service team has reported a notable decrease in inquiries related to vehicle maintenance.

## Electric Vehicle Owner Demographics and Psychographics

A recent study by our Market Research team analyzed the demographics of electric vehicle owners in North America, revealing that 60% of owners are between the ages of 35-55 and have a household income above \$100,000. The study also found that 75% of owners prioritize environmental sustainability when making purchasing decisions. These findings have informed our marketing strategy and helped us tailor our messaging to effectively target this demographic. We plan to conduct further research to refine our understanding of this key market segment.

## Competitor Landscape and Market Share Analysis

As of Q4 2023, Elexion Automotive holds a 12% market share in the North American electric vehicle market, with our main competitors, Tesla and Rivian, holding 40% and 20% respectively. Our Sales team has reported an increase in sales leads generated from trade show appearances and partnerships with eco-friendly organizations. We are currently exploring opportunities to expand our distribution channels and improve our competitiveness in the market. Our goal is to increase our market share by 5% within the next two years.

## Customer Retention Strategies and Recommendations

Our Customer Retention team has implemented a new loyalty program, offering rewards and exclusive discounts to repeat customers. Since its launch in Q2 2023, the program has seen a 50% increase in enrollment, with 2,000 customers redeeming rewards in Q4 alone. We plan to expand the program to

include additional benefits and increase customer engagement through targeted email campaigns and personalized offers. Our goal is to achieve a 20% increase in repeat business within the next year.

## Conclusion

In conclusion, our Q1 2024 customer experience performance review highlights the importance of prioritizing customer satisfaction and loyalty in driving business growth. By addressing key pain points and leveraging customer-centric initiatives, we can improve our competitive positioning and achieve our strategic objectives. The recommendations outlined in this report are designed to inform cross-functional collaboration and drive meaningful improvements in customer experience. We will continue to monitor customer feedback and adjust our strategies accordingly to ensure long-term success.
