# Supplementary material
Source: ML conference proceedings conference paper supplement (https://openreview.net/forum?id=IGYQ4c92e2)
Supplement: supplementary_material [file Customer-Experience-Support-Strategies.pdf › drbench/data/tasks/DR0015/files/IN001/Customer-Experience-Support-Strategies.pdf]

# Enhancing Customer Experience through Support

## Introduction

As the leader of the customer service team, it is crucial to ensure that our after-sales support meets the high standards of our customers. This document will explore the strategies necessary to balance exceptional customer care with efficient and cost-effective service.

## Customer Feedback Analysis

In our ongoing efforts to enhance customer experience, our recent analysis of service requests has yielded valuable insights. Specifically, we've found that the average cost of a single service request from our enterprise customers in North America is \$150, while in Europe it's \$120. Furthermore, software updates tend to average \$80 per request, with these metrics providing valuable context for optimizing resource allocation and cost savings. This information will be crucial in developing our after-sales support strategy, ensuring efficient and cost-effective service delivery to our customers.

## Service Level Agreements

To ensure seamless coordination between our service teams, we have implemented a standardized service level agreement (SLA) framework. This framework outlines clear expectations for response times, resolution timelines, and communication protocols. By streamlining our service delivery process, we have reduced average resolution time by 25% and improved overall service quality.

## Operational Efficiency Metrics

Our manufacturing facility has achieved significant gains in operational efficiency, with a 15% reduction in production costs and a 20% increase in production capacity. These improvements have been achieved through the implementation of lean manufacturing principles and the deployment of advanced manufacturing technology.

## Customer Journey Mapping

Our customer journey mapping exercise helped us identify key touchpoints in the customer experience, including the initial sales interaction, the delivery process, and the post-sales support phase. By mapping these touchpoints, we have been able to identify areas for improvement and implement targeted initiatives to enhance the overall customer experience.

## Strategies for Enhanced Customer Trust

To enhance customer trust, we have been focusing on building strong relationships with our customers through regular communication and transparent service. This has involved the creation of a customer advisory board, which provides a platform for customers to provide feedback and suggestions. Additionally, we have implemented a customer recognition program to reward and incentivize customer loyalty.

## Conclusion

By implementing the strategies outlined in this document, we can ensure that our after-sales support not only meets but exceeds customer expectations, ultimately increasing trust and loyalty.
