# Supplementary material
Source: ML conference proceedings conference paper supplement (https://openreview.net/forum?id=IGYQ4c92e2)
Supplement: supplementary_material [file customer-experience-technology.pdf › drbench/data/tasks/DR0005/files/IN001_pdf/customer-experience-technology.pdf]

# Enhancing Customer Experience with Technology

## Introduction

As the Customer Service Manager at Lee's Market, understanding and enhancing the consumer experience is pivotal to our success in the competitive retail landscape. This document explores various technological strategies that can be implemented to engage our centennial shoppers. By analyzing customer feedback and service trends, we aim to elevate our customer service standards. The following sections provide insights and recommendations for integrating innovative solutions into our operations.

## Current Trends in Retail Technology

The retail landscape is rapidly evolving with a significant shift towards AI-driven solutions to enhance customer interactions. By the second quarter of 2024, it is anticipated that 40% of centennials will favor chatbots for their customer service needs, reflecting a growing trend among younger shoppers who value instant and efficient service. This demographic shift presents an opportunity for Lee's Market to integrate chatbots into their customer service framework, aligning with industry trends that increasingly prioritize technology to improve customer satisfaction and operational efficiency. Adopting these technologies can not only meet centennial expectations but also potentially reduce service costs by facilitating quick resolutions for common inquiries.

## Analyzing Centennial Shopping Behaviors

Recent studies show centennials prefer eco-friendly products, with 74% willing to pay more for sustainable options. They also value brand authenticity, with 82% favoring brands that engage in social causes. Online reviews are critical, influencing 89% of purchasing decisions, while 56% of centennials prioritize brands that offer personalized experiences. These insights provide a broader understanding of centennial preferences beyond technological interactions.

## Integrating Chatbots for Customer Engagement

Integrating chatbots requires a robust backend infrastructure, with 64% of companies investing in API development to ensure seamless data flow. Training AI models on diverse datasets is critical, as it helps improve language understanding by 30%. Security remains a top priority, with 58% of retailers deploying advanced encryption protocols to safeguard customer information. These operational requirements are vital for maintaining chatbot efficiency.

## Improving Online and In-Store Experiences

Lee's Market has focused on store layout optimization, resulting in a 12% increase in foot traffic in 2023. Online, the company introduced a streamlined checkout process that reduced cart abandonment by 18%. Implementing loyalty programs has also been effective, with a 25% rise in repeat purchases reported. These improvements target overall customer satisfaction beyond digital interfaces.

## Enhancing Feedback Mechanisms for Better Service

In the past year, Lee's Market received over 50,000 customer feedback entries, which were analyzed to identify service improvement areas. The implementation of a new CRM system led to a 20% increase in response times to customer queries. Additionally, surveys conducted in 2023 indicate a 15% increase in customer satisfaction due to more personalized service interactions. These efforts focus on strengthening feedback loops rather than chatbot deployment.

# Conclusion

In conclusion, leveraging technology such as chatbots offers a promising avenue for enhancing the consumer experience at Lee's Market, particularly among centennial shoppers. By understanding their unique shopping preferences and behaviors, we can tailor our services to meet their expectations. The next steps involve pilot testing chatbot solutions and gathering data to refine our approach. Continued focus on customer feedback and technological integration will be crucial in maintaining our competitive edge.
