# Supplementary material
Source: ML conference proceedings conference paper supplement (https://openreview.net/forum?id=IGYQ4c92e2)
Supplement: supplementary_material [file customer-loyalty-strategies.pdf › drbench/data/tasks/DR0003/files/IN002_pdf/customer-loyalty-strategies.pdf]

# Enhancing Customer Engagement Through Loyalty Programs

## Introduction

As Lee's Market continues to expand its presence across North America, optimizing customer engagement remains a key focus. This document explores strategic approaches to leverage data-driven loyalty programs. By analyzing customer data, we aim to enhance our marketing strategies and boost customer loyalty. This report provides insights and recommendations for driving sales and customer engagement through innovative loyalty initiatives.

## Trends in Retail Loyalty Programs

Recent studies indicate that 42% of retailers are introducing tiered loyalty systems that offer higher rewards for increased spending. Since 2018, the adoption of mobile app-based programs has increased by 35%, emphasizing convenience over personalization. Lee's Market has observed that 60% of its competitors offer exclusive in-store events for loyalty members, a trend it is currently evaluating. These trends highlight shifts in reward structures rather than customer engagement strategies.

## Leveraging Data for Enhanced Loyalty

In the past year, Lee's Market has focused on integrating inventory management systems with sales analytics, achieving a 12% reduction in overstock. This integration helps streamline supply chain operations by predicting demand more accurately. The IT department reported in September 2023 that system updates improved data processing speeds by 20%. These enhancements primarily support inventory efficiency rather than influencing customer engagement strategies.

## Impact of Omnichannel Marketing

Lee's Market has implemented a cross-platform advertising strategy to boost brand recognition, with a 25% increase in digital ad spend in 2023. By Q3 2023, 58% of customers engaged with both online and in-store promotions, demonstrating the effectiveness of a unified brand message. In-store signage and online banner ads accounted for 40% of new customer acquisitions. This focus on brand visibility and marketing operations doesn't address leveraging loyalty programs.

## Customer Feedback and Program Evolution

Feedback collected in the 2022 annual survey revealed that 72% of customers value product variety over reward incentives. The customer service team noted an 18% increase in satisfaction ratings following the introduction of new Asian snack lines. These insights have guided product assortment adjustments rather than changes to loyalty programs. Lee's Market continues to prioritize expanding product offerings based on this feedback.

## Customer Segmentation and Targeting

Recent data analysis reveals that by the second quarter of 2024, Lee's Market successfully engaged 2,500 new Gen Z members, highlighting our strategic focus on this demographic. This growth is critical as we tailor personalized loyalty rewards to younger consumers, aligning with the industry trend of enhancing engagement through data-driven insights. By effectively tracking these membership increments, we position ourselves to deliver context-aware rewards that resonate with Gen Z, thereby strengthening our market presence and customer loyalty.

# Conclusion

This report highlights the importance of utilizing data-driven insights to refine our loyalty programs. By focusing on customer segmentation and trends, Lee's Market can tailor its offerings to better engage its diverse customer base. Implementing these strategies will not only drive sales but also foster long-term customer relationships. The next steps involve piloting these approaches in select markets to evaluate their effectiveness.
