# Supplementary material
Source: ML conference proceedings conference paper supplement (https://openreview.net/forum?id=IGYQ4c92e2)
Supplement: supplementary_material [file Customer-Trust-Proactive-Support.docx]

# Enhancing Customer Trust through Proactive Support

## Introduction

As Customer Service Team Lead, I believe it is crucial to prioritize customer satisfaction while ensuring efficient and cost-effective service. This report aims to explore strategies for building trust through after-sales support, balancing the need for exceptional customer care with practical considerations.

## Mitigating Barriers to Effective Support

The Elexion Automotive customer service team has implemented a comprehensive training program to ensure that all representatives are equipped with the necessary knowledge and skills to effectively address customer inquiries. Additionally, our team has developed a sophisticated issue-tracking system to efficiently resolve and escalate complex issues. By streamlining our support processes, we can minimize potential barriers to effective support and focus on delivering exceptional customer care.

## Setting the Stage for Customer Trust

In our efforts to enhance customer satisfaction, we've been analyzing our software update resolution processes. Our findings indicate that we can improve our response times by streamlining our diagnostic and repair procedures. For instance, our data shows that 95% of software update requests are resolved within 4 hours, with an average resolution time of just 2 hours during Q2 2024. This swift response is crucial in building trust with our customers, as it demonstrates our commitment to providing efficient and cost-effective service.

## Strategic Priorities for Proactive Service

To stay ahead of the competition, Elexion Automotive has prioritized the development of a proactive service strategy. This involves leveraging advanced data analytics to identify potential issues before they become major problems. By incorporating predictive maintenance and remote diagnostics, we can reduce downtime and improve overall vehicle performance. This proactive approach will enable us to provide our customers with a more personalized and efficient service experience.

## Building Trust through Data-Driven Insights

The Elexion Automotive data analytics team has been working closely with the customer experience department to develop a comprehensive data-driven approach to understanding customer behavior and preferences. By analyzing customer data and feedback, we can identify trends and areas for improvement, ultimately leading to a more tailored and effective service experience. This data-driven approach will enable us to make more informed decisions and drive business growth.

## Conclusion

In conclusion, it is essential to strike a balance between providing exceptional customer care and ensuring efficient and cost-effective service. By prioritizing proactive support and leveraging data-driven insights, we can foster trust and drive customer satisfaction. Next steps include implementing the recommended strategies and monitoring their effectiveness.
