# Supplementary material
Source: ML conference proceedings conference paper supplement (https://openreview.net/forum?id=IGYQ4c92e2)
Supplement: supplementary_material [file customer-trust-report.pdf › drbench/data/tasks/DR0015/files/qa_1755719202/customer-trust-report.pdf]

# Enhancing Customer Trust Through Support Services

## Introduction

As we continue to grow and expand our customer base, it's essential that we prioritize building trust and loyalty through our after-sales support services. As the Customer Service Team Lead, I've identified areas of improvement that can enhance our customer experience while maintaining efficient and cost-effective operations. This report outlines key findings and recommendations for implementing strategies that drive customer satisfaction and retention. By investing in our customers' long-term success, we can solidify our position as a leader in the electric vehicle market.

## Optimizing Service Request Response Times

In 2020, we implemented a new ticketing system to streamline service requests and improve response times. As a result, our average response time decreased by 30% over the course of six months. This improvement allowed our customer service team to handle a higher volume of requests, with a peak of 1,200 requests in August 2020. We continue to monitor and refine our response time metrics to ensure efficient customer support.

## Implementing Personalized Support Solutions

Our marketing department launched a targeted social media campaign in Q1 2023 to promote our EV models to environmentally conscious consumers. The campaign resulted in a 25% increase in website traffic and a 10% increase in sales leads. We also partnered with eco-friendly lifestyle influencers to showcase our vehicles and reach a wider audience. This campaign aligned with our company's sustainability goals and values.

## Customer Feedback and Sentiment Analysis

Our analysis of Q3 2025 after-sales support data reveals that we have made significant strides in resolving customer issues efficiently. On average, our team takes around 4 hours to resolve a support request, with a notable 90% of cases being closed within an 8-hour window. This suggests that our efforts to streamline support processes and enhance team training have yielded positive results. Furthermore, these metrics indicate that we are meeting our goal of providing timely assistance to customers, which is crucial for building trust and loyalty in the competitive EV market. By maintaining this level of performance, we can continue to differentiate ourselves through exceptional after-sales support.

## Balancing Cost Control with Customer Care

In 2022, we conducted an internal audit to assess our operational costs and identify areas for improvement. We found that by renegotiating contracts with our suppliers, we could reduce our procurement costs by 12%. This cost savings allowed us to allocate more resources to our research and development department, which is currently exploring new EV technologies. We continue to monitor our operational costs to ensure efficient resource allocation.

## Measuring Success through Key Performance Indicators

Our HR department tracks employee engagement and satisfaction through quarterly surveys and feedback sessions. In Q2 2023, we reported an 85% employee satisfaction rate, with top factors including a positive work environment and opportunities for professional growth. We also offer training

programs to support employee development and ensure a high-performing team. This focus on employee satisfaction aligns with our company values and mission.

## **Conclusion**

In conclusion, our customer support services play a critical role in building trust and loyalty with our customers. By implementing the strategies outlined in this report, we can enhance our customer experience, drive satisfaction and retention, and ultimately contribute to the company's long-term success. I recommend that we prioritize the implementation of personalized support solutions and optimize our service request response times. By doing so, we can solidify our position as a leader in the electric vehicle market and achieve our business objectives.
