# Supplementary material
Source: ML conference proceedings conference paper supplement (https://openreview.net/forum?id=IGYQ4c92e2)
Supplement: supplementary_material [file Cyber-Security-Framework.pdf › drbench/data/tasks/DR0013/files/IN001/Cyber-Security-Framework.pdf]

# Cybersecurity Framework for EV Protection

## Introduction

As Elexion Automotive continues to innovate in the electric vehicle market, it is crucial to ensure the protection of our products and data from emerging cybersecurity threats.

## Risk Assessment in Connected Vehicle Design

A thorough examination of our vehicle design reveals that, as of Q2 2024, 60% of our models currently integrate V2X communications, a critical component in ensuring the safety and security of our electric vehicles. As our company continues to prioritize cybersecurity, it is essential to understand the scope of our V2X integration to effectively mitigate potential risks. This knowledge will enable us to develop targeted strategies for securing our vehicles' communication systems and protecting against emerging threats.

## Cybersecurity Standards for EV Manufacturing

Elexion Automotive's manufacturing facilities are equipped with state-of-the-art security systems, ensuring the secure storage and transportation of sensitive materials. Our production lines are designed to minimize the risk of data breaches and intellectual property theft. Additionally, our suppliers are vetted and monitored to ensure compliance with our cybersecurity standards. By implementing these measures, we can maintain the confidentiality, integrity, and availability of our data and intellectual property.

## Vulnerability Management in Autonomous Systems

Elexion Automotive's autonomous systems are designed to operate in complex, dynamic environments, where failures can have significant consequences. To ensure the reliability and integrity of our autonomous vehicles, we implement robust testing procedures, thorough system audits, and continuous monitoring. By identifying and addressing vulnerabilities early on, we can minimize the risk of system failures and ensure the safety of our vehicles and their occupants.

## Strategic Approach to Cybersecurity in EV Sector

Elexion Automotive's commitment to sustainability and environmental responsibility extends to our business operations, ensuring that our cybersecurity practices are aligned with our corporate social responsibility initiatives. As a responsible corporate citizen, we engage with industry associations and regulatory bodies to promote best practices in cybersecurity and support the development of international standards. By taking a proactive, strategic approach to cybersecurity, we can mitigate risks and ensure the long-term success of our business.

## **Conclusion**

In conclusion, a comprehensive cybersecurity strategy is essential for Elexion Automotive's electric vehicles. By implementing a risk-based approach, adhering to industry standards, and proactively managing vulnerabilities, we can ensure the protection of our products and customers.
