# Supplementary material
Source: ML conference proceedings conference paper supplement (https://openreview.net/forum?id=IGYQ4c92e2)
Supplement: supplementary_material [file Digital-Experience-Enhancement-Strategy.docx]

# Enhancing Consumer Experience through Digital Channels

## Introduction

As the Customer Service Manager, I am responsible for overseeing the development of service standards and analyzing customer feedback to improve the overall customer experience. In this report, I will explore the potential of leveraging chatbots to enhance the consumer experience for centennial shoppers. This initiative aligns with our company's goal of providing a seamless and personalized experience for our customers. By understanding the needs and preferences of our target audience, we can tailor our services to meet their expectations and drive loyalty.

## Centennial Shoppers' Needs Analysis

According to our market research, centennial shoppers prioritize convenience, flexibility, and personalized experiences. They also expect seamless transitions between online and offline interactions. By understanding their needs, we can better tailor our marketing strategies and improve overall customer satisfaction.

## Chatbot Integration Strategies

To successfully integrate chatbots into our customer service operations, we'll need to consider factors like system integration, data security, and user experience. By developing a comprehensive strategy, we can ensure a smooth transition and minimize disruption to our customers.

## Service Standards Alignment

As we continue to expand our customer service operations, it's crucial to align our service standards with industry best practices. By adopting standardized protocols and procedures, we can ensure consistency across all touchpoints and maintain a high level of customer satisfaction.

## Implementation Roadmap

To successfully implement our customer service strategy, we'll need to develop a detailed roadmap outlining key milestones, timelines, and resource allocation. By breaking down the project into manageable tasks, we can ensure a smooth rollout and minimize potential disruptions.

## Digital Customer Service Trends

In our analysis of customer service issues reported by centennial shoppers in Q2 2025, we found that the average time-to-resolve for these issues was a notable 2 hours and 15 minutes. This lag in resolution time can lead to increased customer frustration and decreased loyalty. As we consider the potential benefits of chatbot implementation for these shoppers, this data highlights the need for more efficient issue resolution. By leveraging AI-powered chatbots, we can reduce resolution times and enhance the overall customer experience, ultimately driving loyalty and retention.

## Future-Proofing the Solution

As we look to the future, it's essential to future-proof our customer service solution by incorporating emerging technologies and trends. By staying ahead of the curve, we can ensure our solution remains relevant and effective in an ever-changing market.

## Conclusion

In conclusion, the integration of chatbots has the potential to revolutionize the way we interact with our customers. To ensure a successful implementation, we must consider the needs of our centennial shoppers and align our service standards accordingly. By doing so, we can provide a personalized experience that meets their evolving needs and expectations. I recommend that we prioritize the development of a comprehensive implementation roadmap to ensure a seamless roll-out of this innovative solution.
