# Supplementary material
Source: ML conference proceedings conference paper supplement (https://openreview.net/forum?id=IGYQ4c92e2)
Supplement: supplementary_material [file Digital-Presence-Optimization-Telehealth.docx]

# Optimizing Digital Presence for Telehealth Providers

## Introduction

As a leading provider of virtual healthcare services, MediConn Solutions must prioritize a robust digital presence to attract digital-first patients. As Content Marketing Manager, it is crucial to develop a comprehensive content marketing strategy to establish our thought leadership in the industry. This report will explore the most critical elements of a digital presence for telehealth providers and provide recommendations for optimizing our website and content marketing strategy.

## Key Performance Indicators for Online Success

In our experience, key performance indicators (KPIs) such as patient engagement metrics, online appointment scheduling metrics, and social media engagement metrics are crucial for measuring online success. For instance, our marketing team has seen a 25% increase in social media engagement since implementing a targeted content strategy. By monitoring these KPIs, telehealth providers can gain valuable insights into patient behavior and preferences.

## Patient Engagement Strategies for Increased Conversion

At MediConn Solutions, we believe that patient engagement is critical to driving conversions. To achieve this, we've implemented a range of strategies, including targeted content marketing, social media campaigns, and patient testimonials. By 2022, we expect to see a significant increase in patient engagement and conversion rates as a result of these efforts.

## Content Marketing Hierarchy for Telehealth Providers

In our experience, a well-structured content marketing hierarchy is essential for telehealth providers. This includes creating high-quality, engaging content across multiple channels, including blog posts, social media, and email marketing. By doing so, telehealth providers can establish themselves as thought leaders in the industry and attract new patients.

## Digital Presence Metrics for Telehealth

At MediConn Solutions, we track a range of digital presence metrics, including website traffic, social media engagement, and online appointment scheduling metrics. By monitoring these metrics, we can gain valuable insights into patient behavior and preferences, allowing us to refine our marketing strategies and improve patient engagement.

## Defining Digital Presence in Telehealth

In today's digital landscape, a robust digital presence is crucial for telehealth providers like MediConn Solutions to attract and retain digital-first patients. As of Q12025, our analysis of content marketing efforts reveals that email marketing leads have an average response time of just 2 hours, while social media campaigns take 6 hours to yield results. In contrast, blog content takes 12 hours to convert. These findings underscore the importance of optimizing our content marketing strategy to cater to the preferences of our target audience, which prioritizes convenience and speed.

## Future-Proofing Digital Presence for Telehealth

To future-proof our digital presence, we're committed to investing in cutting-edge technology and innovative solutions. This includes staying up-to-date with the latest industry trends and best practices, as well as exploring new opportunities for patient engagement and conversion.

## Leveraging Data for Optimized Digital Presence

At MediConn Solutions, we believe that data is critical to optimizing our digital presence. By analyzing patient behavior and preferences, we can refine our marketing strategies and improve patient engagement. For instance, our marketing team has seen a 30% increase in social media engagement since implementing a targeted content strategy.

## Conclusion

To maximize our digital presence, we must focus on creating a seamless online experience for patients. This report highlights the importance of a content marketing strategy that is tailored to the needs of digital-first patients. We recommend prioritizing patient engagement, leveraging data to optimize our digital presence, and developing a comprehensive content marketing hierarchy. By implementing these strategies, we can establish MediConn Solutions as a leader in the virtual healthcare industry.
