# Supplementary material
Source: ML conference proceedings conference paper supplement (https://openreview.net/forum?id=IGYQ4c92e2)
Supplement: supplementary_material [file Digital-Presence-Optimization.pdf › drbench/data/tasks/DR0010/files/IN001/Digital-Presence-Optimization.pdf]

# Optimizing Digital Presence for Telehealth Providers

## Introduction

As a leading virtual healthcare provider, MediConn Solutions recognizes the importance of a robust digital presence. As the Content Marketing Manager, it is my role to oversee the content marketing strategy and ensure our online presence reflects our commitment to providing accessible and cost-effective care. This document aims to outline the critical elements of a successful digital presence and provide recommendations for optimizing our website and content marketing strategy.

## Establishing a Strong Online Reputation

As we continue to refine our content marketing strategy, it's clear that our blog content has been instrumental in driving leads, with 40% of our Q1 2025 leads attributed to this channel. This is a testament to the effectiveness of our targeted content approach, and it's crucial we continue to optimize our blog content to maintain this level of performance. Furthermore, our average conversion rate of 5% suggests that our content is resonating with our target audience and driving tangible results.

## The Role of User Experience in Digital Presence

As part of our company's commitment to employee development, we've introduced a mentorship program that pairs new hires with experienced colleagues. This initiative has shown promising results in improving team collaboration and knowledge sharing.

## Strategies for Attracting Digital-First Patients

In preparation for our upcoming annual report, the finance team is working on finalizing the company's financial statements. This process involves reviewing and auditing various financial data and reports.

## Key Performance Indicators for Evaluating Digital Presence

Our customer service department has been using a new ticketing system to streamline issue resolution. This change has led to a significant reduction in response times and overall customer satisfaction.

## Optimizing Content Marketing for Telehealth Providers

The IT department has been working on upgrading our company's network infrastructure to improve internal communication and collaboration. This project involves replacing outdated hardware and implementing new software solutions.

## Conclusion

In conclusion, a strong digital presence is crucial for telehealth providers like MediConn Solutions. By understanding the critical elements of a robust digital presence and implementing effective strategies for optimization, we can attract more digital-first patients and establish ourselves as a leader in the virtual healthcare industry. I recommend that we prioritize the implementation of the strategies outlined in this document to achieve our goal of providing accessible and cost-effective care to individuals and businesses across Canada.
