# Supplementary material
Source: ML conference proceedings conference paper supplement (https://openreview.net/forum?id=IGYQ4c92e2)
Supplement: supplementary_material [file electricity-cost-analysis-2025.docx]

# Electricity Cost Analysis Report-Q1 2025

## Introduction

This report provides an analysis of the electricity costs for Elexion's Q1 2025 operations. The purpose of this report is to provide a comprehensive overview of the company's electricity expenditures, helping to inform strategic decision-making and budget planning.

## Electricity Consumption Trends

Our analysis of historical energy consumption patterns at our facilities suggests that we can reduce peak demand by 12% by implementing energy-efficient lighting solutions. This initiative is currently being piloted at our flagship production facility, with plans to roll it out to all sites by Q3 2024. The potential savings in energy costs are substantial, but we must balance this with the upfront investment required for new lighting infrastructure. We are currently reviewing proposals from various vendors to determine the best approach.

## Facility Energy Efficiency Initiatives

To further reduce our environmental footprint, we are exploring opportunities to repurpose existing facilities for alternative uses. For instance, our engineering team is investigating the possibility of converting one of our underutilized warehouses into a state-of-the-art electric vehicle charging station. This would not only reduce our overall energy consumption but also generate additional revenue streams. We are currently in discussions with local authorities to determine the feasibility of this initiative.

## North American Energy Market Overview

The North American energy market is characterized by a mix of regulated and unregulated entities, with varying levels of government control. This complexity can create challenges for companies like ours, which must navigate multiple jurisdictions to ensure compliance with energy regulations. As we plan for future growth, it is essential that we stay informed about regulatory changes and adapt our strategies accordingly. We are monitoring developments in the market and consulting with industry experts to ensure we remain ahead of the curve.

## Electricity Pricing Strategies

As part of our ongoing efforts to optimize energy costs, we are reviewing our current pricing strategies to identify opportunities for improvement. For instance, we are considering implementing a time-of-use pricing structure, which would incentivize employees to reduce energy consumption during peak hours. This approach would not only reduce our energy bills but also promote a culture of sustainability within the organization. We are currently analyzing the feasibility of this initiative and consulting with energy experts to determine the best approach.

## Cost Allocation and Forecasting

Our finance team is working closely with the operations department to develop a more accurate cost allocation system for our facilities. This will enable us to better track and manage energy costs, as well as identify areas for improvement. We are currently developing a detailed forecasting model that takes into account various factors, including historical energy consumption patterns and changes in market conditions. This will enable us to make more informed decisions about energy procurement and management.

## Electricity Cost Breakdown by Facility

Our energy management team is currently conducting a thorough analysis of energy consumption patterns at each facility. This will enable us to identify areas of inefficiency and develop targeted strategies for improvement. For instance, our flagship production facility has seen a significant reduction in energy consumption since the implementation of a new lighting system. We are currently reviewing the results of this analysis to determine the best course of action for each facility.

## Conclusion

The analysis presented in this report highlights the importance of monitoring and managing electricity costs for Elexion's long-term sustainability goals. Recommendations for improving energy efficiency and optimizing electricity pricing strategies are provided for further consideration.
