# Supplementary material
Source: ML conference proceedings conference paper supplement (https://openreview.net/forum?id=IGYQ4c92e2)
Supplement: supplementary_material [file Elexion-EV-Battery-Compliance.pdf › drbench/data/tasks/DR0011/files/IN001/Elexion-EV-Battery-Compliance.pdf]

# Elexion's EV Battery Compliance Strategy

## Introduction

As the demand for electric vehicles continues to grow, ensuring the durability and reliability of battery performance is crucial for building trust with our customers. This document outlines the key considerations for Elexion's EV battery compliance strategy.

## Evolving Regulatory Landscape

As we continue to navigate the evolving regulatory landscape, our analysis reveals that a significant portion of our production timeline has been dedicated to meeting the stringent standards set forth by ACC II regulations. Specifically, our data shows that by Q2 2026, 40% of our production timeline has been committed to meeting these regulations since Q2 2024. This emphasis on durability and warranty guarantees for EV batteries is a critical step in ensuring the high performance and reliability standards demanded by regulators and consumers alike. Furthermore, our findings suggest that this proactive approach will enable us to stay on track with our production timelines through 2035.

## Battery Performance Metrics

The Product Development department at Elexion Automotive has been working closely with the Quality Assurance team to develop a set of metrics that assess the performance of our electric vehicle batteries. These metrics include factors such as charge cycle life, depth of discharge, and battery state of health. By tracking these metrics, we can identify areas for improvement and optimize battery performance, ultimately enhancing the overall driving experience for our customers.

## Design for Compliance

The design process at Elexion Automotive involves a collaborative effort between our design, engineering, and manufacturing teams to ensure that our electric vehicles meet the highest standards of quality and safety. This collaborative approach enables us to identify and address potential design flaws early on, thereby minimizing the risk of non-compliance and ensuring that our vehicles are designed with the customer in mind.

## Challenges in Warranty and Maintenance

The Warranty and Maintenance department at Elexion Automotive has been working to develop a comprehensive maintenance schedule for our electric vehicle fleet. This schedule is designed to ensure that our vehicles receive regular maintenance, thereby minimizing the risk of unexpected breakdowns and reducing the need for costly repairs. By implementing this schedule, we can reduce downtime and improve overall vehicle performance.

## Mitigating Risk through Certification

The Certification department at Elexion Automotive is responsible for ensuring that our electric vehicles meet the necessary regulatory requirements. To achieve this, we utilize a rigorous testing and certification process, which includes both internal and external audits to ensure compliance with industry standards. By prioritizing certification, we can mitigate the risk of non-compliance and ensure that our vehicles are designed with the highest standards of quality and safety in mind.

## Conclusion

In conclusion, Elexion's EV battery compliance strategy requires a thorough understanding of evolving regulatory requirements, reliable battery performance metrics, and effective design for compliance. By

addressing these key areas, we can ensure the long-term success of our electric vehicles and build a strong reputation for quality and reliability.
