# Supplementary material
Source: ML conference proceedings conference paper supplement (https://openreview.net/forum?id=IGYQ4c92e2)
Supplement: supplementary_material [file Elexion-QA-Optimization-Electric-Vehicle-Production.docx]

# Optimizing Quality Assurance in Electric Vehicle Production

## Introduction

As Quality Assurance Engineer, it is crucial to identify challenges in electric vehicle production and develop strategies to address them. This report examines the unique quality control requirements for software and user experience issues in electric vehicles, compared to gasoline cars. With Elexion Automotive's commitment to sustainability and user-centric technology, it is essential to optimize quality assurance processes to ensure the highest standards. This report aims to provide insights on how to achieve this goal.

## User Experience Challenges in Electric Vehicles

User experience is a crucial aspect of electric vehicle design. At Elexion Automotive, we prioritize user-centric design to ensure that our vehicles meet the needs of our customers. Our design process involves extensive user research, testing, and feedback to ensure that our vehicles are easy to use and provide a seamless driving experience. We have also implemented a comprehensive training program for our customers to ensure that they are familiar with the features and functionality of our vehicles.

## Defect Detection and Prevention Strategies

Defect detection and prevention are critical components of the quality control process. At Elexion Automotive, we have implemented a range of strategies to detect and prevent defects, including regular inspections, testing, and quality control checks. We also have a robust process for reporting and addressing defects, which ensures that any issues are identified and resolved promptly. Our quality control process is designed to identify and prevent defects at every stage of production, from design to delivery.

## Quality Control Process Optimization

Quality control process optimization is an ongoing process at Elexion Automotive. We continuously monitor and improve our quality control processes to ensure that they are effective and efficient. Our quality control process is designed to be flexible and adaptable, allowing us to respond quickly to changes in the market or industry. We also have a robust process for identifying and addressing areas for improvement, which ensures that our quality control process is always evolving and improving.

## Electromagnetic Compatibility and Interference

Electromagnetic compatibility and interference are critical considerations in the design and manufacture of electric vehicles. At Elexion Automotive, we have implemented a range of measures to ensure that our vehicles meet the necessary standards for electromagnetic compatibility and interference. Our design process involves extensive testing and simulation to ensure that our vehicles meet the required standards. We also have a robust process for testing and verifying the electromagnetic compatibility of our vehicles.

## Future-Proofing Quality Assurance for Emerging Technologies

Future-proofing quality assurance is a critical consideration in the development of emerging technologies. At Elexion Automotive, we are committed to staying ahead of the curve and ensuring that our quality assurance processes are future-proof. We achieve this by continuously monitoring and evaluating emerging technologies, and by designing our quality assurance processes to be flexible and adaptable. This allows us to respond quickly to changes in the market or industry, and to ensure that our quality assurance processes are always effective and efficient.

## Software Quality Control Considerations

In our software quality assurance testing, we've observed a significant allocation of resources towards addressing user experience and interface issues. By Q2 2025, it's anticipated that 50% of our testing time will be dedicated to these areas, reflecting the critical importance of optimized software performance in electric vehicle production. This focus on user-centric design and intuitive controls is crucial for ensuring a seamless driving experience and minimizing quality issues. Furthermore, this priority will enable us to proactively identify and address potential software-related problems, thereby reducing the risk of negative customer experiences.

## Conclusion

In conclusion, optimizing quality assurance processes in electric vehicle production is crucial to address the unique challenges of software and user experience issues. By understanding the importance of defect detection and prevention, quality control process optimization, and future-proofing, we can ensure the highest standards in electric vehicle production. This report provides actionable insights for the intended audience, enabling a comprehensive approach to quality assurance in electric vehicle production.
