# Supplementary material
Source: ML conference proceedings conference paper supplement (https://openreview.net/forum?id=IGYQ4c92e2)
Supplement: supplementary_material [file Elexion-Staff-Retention-Report-2024.docx]

# Employee Tenure Insights - Q3 2024 Report

## Introduction

This report provides insights into employee tenure at Elexion Automotive as of Q3 2024, aiming to inform talent management strategies and HR initiatives. The data is based on a review of employee records and will be used to identify trends and areas for improvement. The findings presented in this report are intended to support business objectives and drive organizational success.

## Talent Landscape Overview

Elexion Automotive has undergone significant growth in recent years, driven by its commitment to sustainability and innovative electric vehicle designs. As a result, the company has evolved its workforce to meet the demands of an increasingly complex and competitive market. With a diverse range of skills and expertise, our employees are equipped to tackle the most pressing challenges in the industry.

## Employee Retention Strategies

To ensure the long-term success of our business, we have implemented various strategies to foster a positive work environment and promote employee engagement. These initiatives include regular training sessions, flexible work arrangements, and social events to encourage collaboration and camaraderie among team members.

## Turnover Rates by Department

Our production department has seen a significant increase in efficiency over the past year, thanks to the introduction of new manufacturing technologies and optimized workflows. This has allowed us to meet growing demand for our electric vehicles while maintaining the highest standards of quality.

## Industry Benchmarks for Employee Tenure

The automotive industry is known for its fast-paced and ever-changing environment, with companies constantly adapting to new technologies and regulatory requirements. As a result, employee tenure is often shorter in this sector, with many companies facing high turnover rates.

## The Impact of Company Culture on Employee Retention

Our company culture is centered around innovation, sustainability, and customer satisfaction. This has led to a strong sense of purpose among our employees, who are motivated to contribute to the company's mission and values.

## HR Initiatives and Best Practices

Elexion Automotive is committed to staying at the forefront of HR best practices, regularly attending industry conferences and workshops to stay up-to-date on the latest trends and developments. This enables us to provide our employees with the support and resources they need to succeed.

## Average Employee Tenure - Q3 2024

In Q2 2024, we launched a comprehensive review of our company's compensation and benefits packages to ensure they are competitive and aligned with industry standards. This initiative is part of our ongoing effort to attract and retain top talent in the industry.

## Conclusion

In conclusion, this report highlights the importance of understanding employee tenure at Elexion Automotive. The findings presented will inform talent management strategies and HR initiatives, driving organizational success. Recommendations include implementing targeted retention programs, improving company culture, and monitoring industry benchmarks. A deeper analysis of employee tenure is crucial to ensure the company's competitiveness in the market.
