# Supplementary material
Source: ML conference proceedings conference paper supplement (https://openreview.net/forum?id=IGYQ4c92e2)
Supplement: supplementary_material [file Elexion_Automotive_Compliance_Audit_Overview.xlsx]

## Sheet: Compliance Audit Financial Over
Quarter	Audit_Cost_Percentage	Audit_Cost_Total	Annual_Revenue	Revenue_Range	Compliance_Certifications
The fiscal quarter for which the compliance audit data is reported, formatted as 'QX YYYY'.	Compliance audit cost as a percentage of the annual revenue for the specified quarter.	Total cost of the compliance audit for the specified quarter, in US dollars.	The total annual revenue of Elexion Automotive, in US dollars.	The range of the annual revenue for Elexion Automotive, given as a descriptive range (e.g., '$350M - $500M').	List of compliance certifications relevant to the audit, separated by commas.
Q4 2024	1.2%	$3,600,000.00	$300,000,000.00	$250M - $350M	ISO 9001, ISO 14001, ISO 45001, ISO 50001
Q3 2025	1.5%	$4,500,000.00	$300,000,000.00	$250M - $350M	ISO 9001, ISO 14001, ISO 45001
Q1 2026	0.9%	$2,700,000.00	$300,000,000.00	$250M - $350M	ISO 9001, ISO 14001
Q1 2024	0.8%	$2,400,000.00	$300,000,000.00	$250M - $350M	ISO 9001, ISO 14001
Q2 2025	1.1%	$3,300,000.00	$300,000,000.00	$250M - $350M	ISO 9001, ISO 14001, ISO 45001
Q4 2025	1.3%	$3,900,000.00	$300,000,000.00	$250M - $350M	ISO 9001, ISO 14001, ISO 45001, ISO 50001
Q2 2024	1.0%	$3,000,000.00	$300,000,000.00	$250M - $350M	ISO 9001, ISO 14001, ISO 45001
Q3 2024	0.9%	$2,700,000.00	$300,000,000.00	$250M - $350M	ISO 9001, ISO 14001
Q1 2025	0.7%	$2,100,000.00	$300,000,000.00	$250M - $350M	ISO 9001, ISO 14001
