# Supplementary material
Source: ML conference proceedings conference paper supplement (https://openreview.net/forum?id=IGYQ4c92e2)
Supplement: supplementary_material [file Elexion_Automotive_Data_Center_Energy_Usage.xlsx]

## Sheet: Data Center Energy Consumption 
Quarter	Energy_Consumption_Cost	Carbon_Footprint_Reduction	Compliance_Impact	EV_Production_Impact
The fiscal quarter for which the energy consumption data is reported, e.g., 'Q2 2024'.	The cost associated with energy consumption for the data center in the specified quarter, represented in USD.	The percentage reduction in carbon footprint achieved by the data center in the specified quarter.	Describes how the energy consumption and carbon footprint align with compliance certifications such as EPA Greenhouse Gas Emissions Compliance.	Details how the data center's energy metrics influence or relate to electric vehicle production challenges.
Q1 2024	85000	0.25	Partially aligned with EPA Greenhouse Gas Emissions Compliance	Minimal impact on electric vehicle production
Q2 2023	72000	0.15	Aligned with EPA Greenhouse Gas Emissions Compliance	Positive impact on electric vehicle production
Q1 2023	70000	0.12	Partially aligned with EPA Greenhouse Gas Emissions Compliance	Negligible impact on electric vehicle production
Q3 2023	75000	0.18	Not aligned with EPA Greenhouse Gas Emissions Compliance	Negative impact on electric vehicle production
Q3 2022	68000	0.08	Partially aligned with EPA Greenhouse Gas Emissions Compliance	Neutral impact on electric vehicle production
Q1 2022	65000	0.03	Aligned with EPA Greenhouse Gas Emissions Compliance	Positive impact on electric vehicle production
Q4 2023	78000	0.2	Aligned with EPA Greenhouse Gas Emissions Compliance	No significant impact on electric vehicle production
Q4 2022	69000	0.1	Aligned with EPA Greenhouse Gas Emissions Compliance	No impact on electric vehicle production
Q2 2022	66000	0.05	Not aligned with EPA Greenhouse Gas Emissions Compliance	Slight impact on electric vehicle production
Q2 2024	90000	0.3	Aligned with EPA Greenhouse Gas Emissions Compliance	Data center energy consumption metrics do not address the unique challenges of electric vehicle production
