# Supplementary material
Source: ML conference proceedings conference paper supplement (https://openreview.net/forum?id=IGYQ4c92e2)
Supplement: supplementary_material [file Elexion_Automotive_Employee_Bonus_Distribution.xlsx]

## Sheet: Employee_Bonus_Distribution
Quarter	Number_of_Bonuses	Total_Bonus_Amount	Average_Bonus_Amount	Company_Performance_Impact
The fiscal quarter during which the bonuses were issued, e.g., 'Q3 2024'.	The total number of bonuses issued to employees during the specified quarter.	The total monetary value of all bonuses issued in the specified quarter.	The average amount of bonus awarded per employee during the specified quarter.	A qualitative description of how the bonus distribution aligns with or impacts company performance metrics.
Q1 2025	17	153000	9000	Bonuses aligned with moderate company growth
Q3 2024	20	200000	10000	Employee bonuses do not address the core DR Question focus area
Q1 2023	15	150000	10000	Bonuses aligned with steady company growth
Q2 2024	16	160000	10000	Bonuses supported by increased revenue
Q2 2025	11	99000	9000	Reduced bonuses due to budget constraints
Q1 2024	14	140000	10000	Bonuses issued to retain key talent
Q4 2024	13	130000	10000	Performance bonuses for achieving quarterly targets
Q3 2023	12	120000	10000	Regular distribution, maintained employee satisfaction
Q2 2023	18	162000	9000	Increased bonuses due to high performance
Q4 2023	10	110000	11000	Year-end bonuses incentivized project completion
