# Supplementary material
Source: ML conference proceedings conference paper supplement (https://openreview.net/forum?id=IGYQ4c92e2)
Supplement: supplementary_material [file Elexion_Automotive_Employee_Retention_Bonuses_Q1.xlsx]

## Sheet: Employee_Retention_Bonuses_Q1_2
bonus_count	total_bonus_amount	average_bonus_amount	quarter	year
The number of employee retention bonuses issued in Q1 2023. This reflects the company's strategy to retain key talent in a competitive EV industry.	The total monetary value of the employee retention bonuses issued in Q1 2023. This indicates the financial commitment to employee retention.	The average amount of each retention bonus issued. This provides insight into the standard bonus amount offered to employees.	The fiscal quarter during which the bonuses were issued, providing a temporal context for the data.	The fiscal year in which the bonuses were issued, providing a broader temporal context for trend analysis.
5	50000	10000	Q1	2022
11	110000	10000	Q4	2020
14	140000	10000	Q3	2020
9	90000	10000	Q3	2021
7	70000	10000	Q1	2021
12	120000	10000	Q4	2021
15	150000	10000	Q3	2022
10	100000	10000	Q4	2022
6	60000	10000	Q2	2021
8	80000	10000	Q2	2022
25	250000	10000	Q1	2023
