# Supplementary material
Source: ML conference proceedings conference paper supplement (https://openreview.net/forum?id=IGYQ4c92e2)
Supplement: supplementary_material [file Elexion_Automotive_Employee_Turnover_Q1_2025.xlsx]

## Sheet: EmployeeTurnoverMetricsQ1_2025
Period	TotalEmployees	EmployeesLeft	TurnoverRate	PrimaryReason	RetentionInitiatives
The time period for which the employee turnover data is reported, e.g., 'Q1 2025'.	The total number of employees at the beginning of the period.	The number of employees who left the company during the period.	The rate of employee turnover for the period, calculated as (EmployeesLeft / TotalEmployees) * 100.	The primary reason identified for employee departures during the period.	Key initiatives or strategies implemented to improve employee retention during the period.
Q1 2024	240	25	10.42%	Better Opportunities	Increased training budgets
Q4 2022	255	20	7.84%	Retirement	Retirement planning workshops
Q3 2024	270	22	8.15%	Work-Life Balance	Remote work options
Q4 2023	245	19	7.76%	Compensation	Salary adjustments
Q2 2024	255	18	7.06%	Career Change	Mentorship programs
Q1 2023	250	24	9.60%	Health Issues	Wellness programs
Q4 2024	260	20	7.69%	Personal Reasons	Flexible working hours
Q3 2023	260	21	8.08%	Workload	Additional staffing
Q2 2023	265	17	6.42%	Relocation	Remote work incentives
Q1 2025	250	30	12.00%	Better Opportunities	Enhanced career development programs
