# Supplementary material
Source: ML conference proceedings conference paper supplement (https://openreview.net/forum?id=IGYQ4c92e2)
Supplement: supplementary_material [file Elexion_Automotive_Employee_Wellness_Budget.xlsx]

## Sheet: Employee_Wellness_Program_Budge
Quarter	Budget_Allocation	Focus_Area	Employee_Count	Industry_Compliance
The fiscal quarter for which the budget allocation is reported, e.g., 'Q1 2025'. This helps in understanding the time period associated with the wellness program budget.	The total amount of money allocated for employee wellness programs in the specified quarter. This reflects the company's investment in employee well-being.	The primary focus area of the wellness program for the given quarter, e.g., 'mental health'. This provides insight into specific initiatives being prioritized.	The number of employees at the company during the specified quarter. This allows for analysis of budget allocation per employee.	Indicates if the wellness program meets industry compliance standards, reflecting the company’s adherence to regulatory requirements.
Q2 2023	80000	nutrition	2100	TRUE
Q4 2023	100000	exercise	2200	TRUE
Q3 2024	250000	nutrition	2400	TRUE
Q1 2023	75000	physical health	2100	FALSE
Q1 2025	500000	mental health	2500	TRUE
Q1 2024	150000	financial wellness	2300	FALSE
Q2 2024	200000	stress management	2300	TRUE
Q4 2024	300000	physical health	2400	TRUE
Q3 2023	90000	mental health	2200	FALSE
