# Supplementary material
Source: ML conference proceedings conference paper supplement (https://openreview.net/forum?id=IGYQ4c92e2)
Supplement: supplementary_material [file Elexion_Automotive_Facility_Maintenance_Budget.xlsx]

## Sheet: Facility_Maintenance_Budget_All
Quarter	Total_Budget	Green_Initiatives_Allocation	Green_Initiatives_Budget
The fiscal quarter for which the budget is allocated, e.g., 'Q4 2025'.	The total budget allocated for facility maintenance in the specified quarter.	The percentage of the total budget allocated specifically for green initiatives, reflecting the company's focus on sustainability.	The actual budget in dollars allocated for green initiatives, calculated from the total budget and the percentage allocation.
Q2 2026	520000	0.11	57200
Q2 2025	550000	0.09	49500
Q1 2025	500000	0.08	40000
Q2 2024	420000	0.06	25200
Q3 2026	530000	0.12	63600
Q1 2024	400000	0.05	20000
Q4 2025	600000	0.1	60000
Q3 2025	580000	0.07	40600
Q4 2024	450000	0.1	45000
Q3 2024	470000	0.07	32900
Q1 2026	500000	0.09	45000
