# Supplementary material
Source: ML conference proceedings conference paper supplement (https://openreview.net/forum?id=IGYQ4c92e2)
Supplement: supplementary_material [file Elexion_Automotive_IT_Costs_Per_Employee.xlsx]

## Sheet: IT_Infrastructure_Costs_Per_Emp
Quarter	Average_Cost_Per_Employee	Total_IT_Spend	Employee_Count	Revenue_Impact_Percentage
The fiscal quarter for which the IT infrastructure costs were calculated, e.g., Q2 2024.	The average cost of IT infrastructure per employee in the specified quarter.	The total amount spent on IT infrastructure for the specified quarter.	The total number of employees considered in the calculation for the specified quarter.	The percentage of the total IT spend out of the company's annual revenue, providing context on financial impact.
Q2 2022	$830.00	$1,660,000.00	2000	1.08%
Q1 2022	$820.00	$1,640,000.00	2000	1.07%
Q1 2023	$950.00	$1,800,000.00	1895	1.20%
Q1 2024	$1,150.00	$2,070,000.00	1800	1.40%
Q3 2023	$1,050.00	$1,980,000.00	1886	1.30%
Q2 2023	$1,000.00	$1,900,000.00	1900	1.25%
Q4 2022	$900.00	$1,750,000.00	1944	1.15%
Q2 2024	$1,200.00	$2,300,000.00	1917	1.50%
Q4 2023	$1,100.00	$2,000,000.00	1818	1.35%
Q3 2022	$850.00	$1,700,000.00	2000	1.10%
