# Supplementary material
Source: ML conference proceedings conference paper supplement (https://openreview.net/forum?id=IGYQ4c92e2)
Supplement: supplementary_material [file Elexion_Automotive_Quarterly_Financial_Insights.xlsx]

## Sheet: Quarterly_Financial_Insights
Quarter	Training_Budget	Budget_Change_Percentage	Strategic_Alignment
The fiscal quarter and year to which the data pertains, e.g., Q3 2024. This provides a time reference for the financial insights presented.	The total budget allocated for training during the specified quarter. This includes any increases or decreases from previous quarters.	The percentage change in the training budget compared to the previous quarter. This helps in evaluating budget trends over time.	Indicates whether the training budget aligns with the company's strategic goals, such as compliance or market expansion. TRUE if aligned, FALSE otherwise.
Q2 2024	95000	0.03	FALSE
Q2 2023	87500	0.02	FALSE
Q4 2022	82000	-0.03	TRUE
Q1 2023	86000	0.05	TRUE
Q3 2024	100000	0.05	TRUE
Q1 2024	92000	0.02	TRUE
Q3 2023	91000	0.04	TRUE
Q4 2023	90000	-0.01	FALSE
Q2 2022	83000	0.01	TRUE
Q3 2022	84500	0.02	FALSE
