# Supplementary material
Source: ML conference proceedings conference paper supplement (https://openreview.net/forum?id=IGYQ4c92e2)
Supplement: supplementary_material [file Elexion_Automotive_Quarterly_Financial_Performance.xlsx]

## Sheet: Quarterly Financial Performance
Quarter	Logistics Costs	Percentage Change in Costs	Impact on Customer Trust
The fiscal quarter being reported, e.g., 'Q1 2025'. This helps identify the time period for the financial data.	Total logistics costs for the quarter. This represents the expenditure on transportation, warehousing, and other logistics activities.	The percentage change in logistics costs compared to the previous quarter. This metric helps to understand cost efficiency improvements or deteriorations.	Indicates whether the logistics costs impact customer trust and after-sales support. This is a qualitative assessment of how logistics efficiency relates to customer satisfaction.
Q4 2024	1650000	0.05	TRUE
Q1 2023	1.30612e+06	0.03	TRUE
Q2 2023	1.33333e+06	0.02	FALSE
Q3 2023	1440000	0.08	TRUE
Q1 2024	1575000	0.15	TRUE
Q2 2024	1.43182e+06	-0.09	TRUE
Q4 2023	1.37391e+06	-0.05	FALSE
Q3 2024	1575000	0.1	FALSE
Q1 2025	1500000	-0.1	FALSE
