# Supplementary material
Source: ML conference proceedings conference paper supplement (https://openreview.net/forum?id=IGYQ4c92e2)
Supplement: supplementary_material [file Elexion_Automotive_Quarterly_Recruitment_Costs.xlsx]

## Sheet: Quarterly Recruitment Costs
Quarter	New Hires	Recruitment Cost	Cost Per Hire	Employee Count
The specific fiscal quarter and year for which the recruitment data is reported. Format: 'Q[n] YYYY'	The number of new employees hired during the specified quarter.	The total cost incurred for recruitment in the specified quarter, including all related expenses.	The average recruitment cost for each new hire in the specified quarter.	The total number of employees in the company at the end of the specified quarter.
Q3 2023	8	75000	9375	130
Q4 2023	6	60000	10000	135
Q2 2024	7	65000	9285.71	145
Q4 2024	5	55000	11000	155
Q1 2023	5	50000	10000	120
Q1 2024	9	85000	9444.44	140
Q3 2024	10	90000	9000	150
Q2 2023	7	70000	10000	125
