# Supplementary material
Source: ML conference proceedings conference paper supplement (https://openreview.net/forum?id=IGYQ4c92e2)
Supplement: supplementary_material [file Elexion_Automotive_SQA_Test_Report.xlsx]

## Sheet: Software Quality Assurance Test
Testing_Period	UX_UI_Testing_Allocation	Total_Testing_Hours	EV_Model_Focus	QA_Engineer_Responsible
The specific time period during which the software quality assurance testing is being analyzed. This relates to when the testing efforts are being evaluated.	The proportion of testing time dedicated to user experience and interface issues. This metric helps in understanding the focus on enhancing user interactions with the software.	The total number of hours allocated for software quality assurance testing in the given period. This provides context for the proportion of time spent on specific issues.	The specific electric vehicle model or models that are the focus of the testing efforts. This helps in associating testing allocation with particular products.	The name of the Quality Assurance Engineer responsible for overseeing the testing allocation. This relates to accountability and traceability in testing processes.
2023-04-01	25.00%	135	Model Y	Hannah Bell
2025-04-01	30.00%	120	Model Y	Bob Smith
2024-07-01	25.00%	140	Model X	Diana Evans
2023-01-01	10.00%	95	Model Z	Ian King
2024-10-01	20.00%	130	Model Z	Charlie Davis
2025-07-01	45.00%	150	Model X	Alice Johnson
2025-01-01	40.00%	145	Model Z	Fiona Clark
2023-07-01	15.00%	100	Model X	George Harris
2024-01-01	35.00%	110	Model Y	Evan Mitchell
