# Supplementary material
Source: ML conference proceedings conference paper supplement (https://openreview.net/forum?id=IGYQ4c92e2)
Supplement: supplementary_material [file Elexion_EV_Battery_Design_Features_Analysis.xlsx]

## Sheet: EV_Battery_Design_Features
Market	Feature_Percentage	Reporting_Quarter	AI_Enhancement_Impact	Compliance_Status
The geographical market where the EV battery design is being implemented, e.g., North America.	The percentage of the EV battery design that features AI-enhanced battery management.	The financial quarter and year being reported, e.g., Q2 2025.	A brief description of the impact of AI-enhanced battery management on the EV battery design.	Indicates whether the battery design is compliant with relevant regulations, e.g., EPA Greenhouse Gas Emissions Compliance.
Europe	0.15	Q4 2024	Basic AI features implemented for testing.	FALSE
South America	0.05	Q3 2024	Minimal AI features with limited impact.	FALSE
South America	0.2	Q4 2024	Minor improvements in charge cycle prediction.	TRUE
North America	0.4	Q2 2025	Significant improvement in battery lifespan and efficiency.	TRUE
Europe	0.25	Q1 2025	Moderate improvement in battery efficiency.	TRUE
Asia	0.1	Q3 2024	Initial phase of AI integration.	FALSE
North America	0.22	Q4 2024	Basic AI implementation for initial market feedback.	TRUE
North America	0.35	Q1 2025	Improved charging times and better thermal management.	TRUE
Asia	0.3	Q1 2025	Enhanced energy distribution across cells.	FALSE
