# Supplementary material
Source: ML conference proceedings conference paper supplement (https://openreview.net/forum?id=IGYQ4c92e2)
Supplement: supplementary_material [file Elexion_EV_Battery_Lifespan_Analysis.xlsx]

## Sheet: EV_Battery_Lifespan_Data
Data_Year	Battery_Lifespan_Years	AI_Enhanced_Management	Data_Collection_Quarter	Region
The year the data was collected, providing a timeline for analysis.	Average lifespan of EV batteries in years, reflecting the durability and effectiveness of the batteries.	Indicates whether AI-enhanced battery management was used during data collection, relevant for assessing technological impact.	The quarter in which the data was collected (e.g., Q1, Q2, Q3, Q4), providing more granular time reference.	The geographical region where the data was collected, important for regional compliance and market analysis.
2022	7	FALSE	Q3	Asia
2020	6.5	FALSE	Q1	North America
2025	8.2	FALSE	Q2	Australia
2025	8.5	TRUE	Q3	Global
2023	7.2	TRUE	Q4	South America
2024	7.5	TRUE	Q1	Africa
2021	6.8	TRUE	Q2	Europe
