# Supplementary material
Source: ML conference proceedings conference paper supplement (https://openreview.net/forum?id=IGYQ4c92e2)
Supplement: supplementary_material [file Elexion_EV_Battery_Replacement_Cost_Analysis.xlsx]

## Sheet: EV_Battery_Replacement_Cost_Ana
Fleet_Identifier	Analysis_Quarter	Average_Replacement_Cost	Potential_Cost_Savings	Technology_Impact
Unique identifier for the fleet or category of vehicles being analyzed for battery replacement costs.	Fiscal quarter during which the analysis is conducted, formatted as Q[1-4] YYYY.	Average cost of replacing the EV battery in the specified fleet during the analysis quarter, in USD.	Estimated cost savings achieved through improved battery lifespan, potentially using AI-enhanced management techniques.	Description of how technology, such as AI-enhanced battery management, impacts the replacement cost or lifespan of the batteries.
Current_Fleet	Q4 2024	$120,000.00	$15,000.00	AI-enhanced battery management is expected to extend battery lifespan, leading to significant cost savings.
Fleet_C	Q3 2023	$100,000.00	$13,000.00	AI forecasting models predict optimal replacement times, minimizing costs.
Fleet_A	Q1 2023	$90,000.00	$10,000.00	AI technology helps optimize charging cycles, reducing wear and tear.
Fleet_B	Q2 2023	$95,000.00	$12,000.00	Battery diagnostics improved by AI, leading to targeted maintenance.
Fleet_F	Q2 2024	$115,000.00	$14,500.00	Improved thermal management through AI extends battery longevity.
Fleet_G	Q3 2024	$118,000.00	$14,800.00	AI-driven optimization of battery charging and discharging cycles.
Fleet_E	Q1 2024	$105,000.00	$11,000.00	Predictive analytics powered by AI reduce unexpected failures.
Fleet_D	Q4 2023	$110,000.00	$14,000.00	Enhanced AI monitoring extends battery life by optimizing usage patterns.
