# Supplementary material
Source: ML conference proceedings conference paper supplement (https://openreview.net/forum?id=IGYQ4c92e2)
Supplement: supplementary_material [file Elexion_Roadside_Assistance_Performance_Report.xlsx]

## Sheet: Roadside_Assistance_Performance
Time_Period	Average_Wait_Time_Minutes	Customer_Satisfaction_Score	Total_Assistance_Requests	Response_Time_Variance
The specific quarter and year for the data, allowing for easy comparison across different periods.	The average wait time in minutes for roadside assistance services during the specified time period.	A numerical score representing the average customer satisfaction for roadside assistance services, derived from feedback surveys.	The total number of roadside assistance requests received during the specified time period.	The statistical variance in response times, indicating consistency or variability in service.
Q1 2024	33	3.9	4400	21.5
Q4 2024	32	4	4700	22
Q2 2024	29	4.1	4500	19
Q3 2023	36	3.6	4200	26
Q2 2023	31	4	4100	20.5
Q3 2024	35	3.8	4600	25
Q2 2025	28	4.3	4900	18.5
Q3 2025	25	4.5	5000	15
Q1 2025	30	4.2	4800	20
Q1 2023	37	3.5	4000	27
Q4 2023	34	3.7	4300	23
