# Supplementary material
Source: ML conference proceedings conference paper supplement (https://openreview.net/forum?id=IGYQ4c92e2)
Supplement: supplementary_material [file Elexion_Warranty_Claim_Resolution_Stats.xlsx]

## Sheet: Warranty_Claim_Resolution_Rates
Quarter	Resolution_Rate	Customer_Experience_Impact
The fiscal quarter and year for which the warranty claim resolution rate is reported (e.g., 'Q3 2025').	The percentage of warranty claims resolved within one week for the specified quarter, indicating the efficiency of the customer service team.	A qualitative assessment of how the resolution rate affects customer experience and satisfaction, relevant for strategic planning by the Customer Service Team Lead.
Q4 2024	66.00%	Slight dip in resolution rate, action required to maintain customer satisfaction levels.
Q4 2025	69.50%	High resolution rate continues to support strong customer relations.
Q3 2025	70.00%	High resolution rate builds trust and enhances after-sales support efficiency.
Q2 2025	68.50%	Incremental improvements in service efficiency noted.
Q1 2025	69.00%	Near-target resolution rate, enhancing service reputation.
Q3 2024	67.00%	Resolution rate consistent with previous quarters, maintaining customer confidence.
Q2 2024	68.00%	Positive feedback from customers, indicating better service.
Q1 2024	65.00%	Steady improvement in customer satisfaction.
