# Supplementary material
Source: ML conference proceedings conference paper supplement (https://openreview.net/forum?id=IGYQ4c92e2)
Supplement: supplementary_material [file ElexionAutomotive_Q3_2025_Expenditure_Analysis.xlsx]

## Sheet: Q3_2025_Expenditure_Analysis
Department	Program_Name	Allocation_Amount	Focus_Area	Quarter	Year
The department within the company responsible for the expenditure. This helps in understanding which business unit is investing in wellness programs.	The specific name or type of the employee wellness program. This column categorizes the various wellness initiatives.	The amount allocated to each employee wellness program, focusing on mental health in the given quarter. Helps track financial commitment towards employee wellbeing.	The specific focus area of the wellness program, e.g., mental health, physical health, etc. This describes the core intent of the program.	The fiscal quarter for which the data is reported, e.g., Q3 2025. Provides a timeline for the analysis.	The fiscal year for which the data is reported. It is essential for annual performance tracking.
Human Resources	Mental Health Initiative	$350,000.00	Mental Health	Q3 2025	2025
Research and Development	Mindfulness Program	$35,000.00	Mental Health	Q3 2025	2025
Marketing	Yoga Classes	$20,000.00	Physical Health	Q3 2025	2025
Operations	Gym Memberships	$45,000.00	Physical Health	Q3 2025	2025
Sales	Stress Management Workshop	$25,000.00	Mental Health	Q3 2025	2025
Customer Service	Wellness Retreat	$40,000.00	Mental Health	Q3 2025	2025
Finance	Financial Wellness Program	$50,000.00	Financial Health	Q3 2025	2025
IT	Tech Meditation	$30,000.00	Mental Health	Q3 2025	2025
