# Supplementary material
Source: ML conference proceedings conference paper supplement (https://openreview.net/forum?id=IGYQ4c92e2)
Supplement: supplementary_material [file employee-benefits-report.pdf › drbench/data/tasks/DR0009/files/qa_1755705296/employee-benefits-report.pdf]

# Q2 2025 Employee Benefits Participation Report

## Introduction

As we continue to prioritize employee well-being and satisfaction, it is essential to monitor and analyze our employee benefits enrollment rates. This report provides an overview of the current state of employee benefits participation within MediConn Solutions, highlighting key trends and insights from Q2 2025. The purpose of this document is to inform HR and leadership teams about the effectiveness of our benefits programs and identify areas for improvement. By examining our employee benefits landscape, we can refine our strategies to better support the needs of our workforce.

## Benefits Program Utilization Trends and Projections

Our recent analysis of industry benchmarks revealed a 12% increase in employee wellness initiatives since 2022. As a result, we've seen a notable shift towards preventive care programs, with 85% of our clients expressing interest in expanding their current offerings. By Q1 2025, we had already onboarded 15 new clients to our wellness platform, with an average employee participation rate of 70%. This trend is expected to continue, with projections indicating a 10% growth in wellness program adoption by the end of 2026.

## Employee Engagement and Satisfaction Drivers

According to our latest employee survey conducted in April 2025, 92% of respondents cited 'flexible work arrangements' as a key factor influencing their job satisfaction. This finding aligns with our company's efforts to promote work-life balance, as evidenced by the 25% increase in remote work arrangements implemented since 2023. Furthermore, our employee recognition program has seen a significant boost, with 150 employees recognized for their outstanding contributions in Q2 2025 alone. This program has been instrumental in fostering a positive work environment and encouraging employee loyalty.

## Q2 2025 Participation Metrics and Analysis

Our quarterly review of customer engagement metrics revealed a 20% increase in patient portal logins between Q1 and Q2 2025. This uptick in activity can be attributed to the successful rollout of our new user interface, which improved navigation and accessibility for our patients. Additionally, our customer support team reported a 15% decrease in average response times, further enhancing the overall user experience. These metrics demonstrate our commitment to delivering high-quality virtual healthcare services and meeting the evolving needs of our patients.

## Conclusion

In conclusion, our Q2 2025 employee benefits participation rates indicate a positive trend, with opportunities for growth and improvement. To enhance employee satisfaction and benefits utilization, we recommend refining our communication strategies and expanding our wellness programs. By prioritizing employee well-being and continually assessing our benefits landscape, we can foster a healthier and more productive workforce. Next steps include presenting these findings to the leadership team and collaborating with HR to develop targeted initiatives.
