# Supplementary material
Source: ML conference proceedings conference paper supplement (https://openreview.net/forum?id=IGYQ4c92e2)
Supplement: supplementary_material [file employee-benefits-report.pdf › drbench/data/tasks/DR0010/files/qa_1755711940/employee-benefits-report.pdf]

# Q3 2025 Employee Benefits Cost Analysis Report

## Introduction

As we continue to navigate the complexities of providing virtual healthcare services, it is essential to monitor and analyze our employee benefits costs. This report aims to provide an overview of our employee benefits expenses in Q3 2025, highlighting key trends and areas for improvement. By examining our benefits costs, we can better understand our operational efficiency and identify opportunities to optimize our resources. This analysis will inform our strategic planning and budgeting decisions for the upcoming quarter.

## Employee Benefits Package Design and Implementation

Our employee benefits package was revamped in Q2 2024 to include additional mental health resources, resulting in a 25% increase in employee engagement with our Employee Assistance Program (EAP). This redesign also led to a significant reduction in turnover rates among our clinical staff, from 18% to 12% over the course of six months. Furthermore, we introduced a flexible benefits plan, allowing employees to customize their coverage to meet their individual needs. This change has been well-received, with 85% of employees reporting satisfaction with the new plan.

## Q3 2025 Payroll and Compensation Analysis

In Q3 2025, our compensation analysis revealed that our average salary for registered nurses was 10% above the national average, allowing us to remain competitive in the job market. We also implemented a performance-based bonus structure for our administrative staff, resulting in a 15% increase in productivity. Additionally, our payroll team successfully transitioned to a new payroll management system, reducing processing time by 30%. This change has enabled us to better manage our workforce and make data-driven decisions.

## Employee Benefits Cost as a Percentage of Total Expenses

Our company's total expenses have been increasing steadily over the past year, with a 12% growth in operational costs due to the expansion of our virtual care services. This expansion has led to a significant increase in technology and infrastructure expenses, from \$1.2 million to \$1.8 million. However, our revenue growth has kept pace with these increased expenses, ensuring our financial stability. As we continue to grow, it is essential to monitor our expenses and identify areas for cost optimization.

## Benefits Utilization and Employee Engagement Trends

Our analysis of benefits utilization trends has shown that 70% of our employees are actively engaged with our wellness programs, including fitness classes and nutrition workshops. This high level of engagement has led to a significant reduction in absenteeism, from 5% to 3% over the past year. Furthermore, our employee engagement surveys have revealed a strong correlation between benefits utilization and job satisfaction, with 90% of employees reporting that our benefits package is an essential factor in their decision to remain with the company.

## Recommendations for Cost Containment and Optimization Strategies

To optimize our operational costs, we recommend implementing a telecommuting policy for our administrative staff, which is expected to reduce our facilities expenses by 20%. Additionally, we

suggest streamlining our procurement processes to reduce waste and improve efficiency. By implementing these strategies, we can ensure that our company remains financially sustainable while continuing to provide high-quality virtual healthcare services to our patients.

## **Conclusion**

In conclusion, our analysis of employee benefits costs in Q3 2025 highlights the importance of ongoing monitoring and evaluation. By implementing cost containment strategies and optimizing our benefits packages, we can reduce our expenses while maintaining a competitive and attractive employee value proposition. Our recommendations will inform the development of our benefits strategy for the upcoming quarter, aligning with our organizational goals and objectives. We will continue to track and analyze our benefits costs to ensure we are operating efficiently and effectively.
