# Supplementary material
Source: ML conference proceedings conference paper supplement (https://openreview.net/forum?id=IGYQ4c92e2)
Supplement: supplementary_material [file Employee-Engagement-Metrics-Report.docx]

# Employee Engagement Metrics Report - Q1 2025

## Introduction

As we continue to grow and evolve as a virtual healthcare provider, it is essential to monitor and analyze our employee turnover rate to ensure we are meeting the needs of our valued staff. This report aims to provide an overview of our Q1 2025 employee engagement metrics, highlighting key trends and insights.

## Workforce Planning and Management Initiatives

Our organization is committed to ongoing workforce planning and management, ensuring that our talent pool is equipped to meet the demands of our fast-paced virtual healthcare environment. To achieve this, we have implemented a robust succession planning framework, which enables us to identify and develop high-potential employees. This approach has led to significant improvements in our leadership pipeline. As a result, we have seen a 25% increase in internal promotions over the past two years.

## Employee Retention Strategies and Best Practices

In our efforts to foster a positive work environment, we have introduced a range of employee retention strategies, including flexible work arrangements, professional development opportunities, and regular feedback mechanisms. These initiatives have resulted in a significant reduction in absenteeism, with an average decrease of 15% over the past 12 months. Our teams are more engaged and motivated than ever, leading to improved overall job satisfaction.

## Staff Satisfaction and Engagement Surveys

To assess the effectiveness of our employee retention strategies, we conduct regular staff satisfaction and engagement surveys. These surveys provide valuable insights into employee sentiment, allowing us to identify areas for improvement and make data-driven decisions. The most recent survey revealed a 92% overall satisfaction rate, with 85% of respondents citing a sense of purpose and fulfillment in their work.

## Quarterly Performance Metrics and Analysis

Our quarterly performance metrics and analysis provide valuable insights into our operational efficiency and effectiveness. By tracking key performance indicators, such as patient satisfaction ratings and clinical outcomes, we can identify areas for improvement and make data-driven decisions. Our latest quarterly report revealed a 12% increase in patient engagement and a 15% reduction in telephone abandonment rates.

## Turnover Rate Insights and Recommendations

Our organization is committed to providing ongoing training and development opportunities to ensure our employees have the skills and knowledge required to excel in their roles. This approach has led to a significant reduction in training days, with an average decrease of 30% over the past 12 months. By investing in our people, we can improve overall job satisfaction and reduce turnover rates.

## Action Plan for Employee Retention and Development

As part of our ongoing commitment to employee retention and development, we have developed a comprehensive action plan aimed at improving overall job satisfaction and reducing turnover rates. This plan includes a range of initiatives, from flexible work arrangements and professional development opportunities to regular feedback mechanisms and team-building activities. By implementing these strategies, we can create a positive work environment that fosters engagement, motivation, and a sense of purpose.

## Conclusion

In conclusion, our Q1 2025 employee turnover rate highlights the need for continued focus on workforce planning, employee retention strategies, and staff satisfaction. We recommend implementing the action plan outlined in this report to address these areas and promote a positive, productive work environment.
