# Supplementary material
Source: ML conference proceedings conference paper supplement (https://openreview.net/forum?id=IGYQ4c92e2)
Supplement: supplementary_material [file employee-retention-report.pdf › drbench/data/tasks/DR0005/files/DI001_pdf/employee-retention-report.pdf]

# Q2 2024 Employee Retention Analysis Report

## Introduction

As we continue to expand our operations across the U.S. and Canada, it is essential that we prioritize employee retention to maintain our competitive edge. This report provides an overview of our employee retention strategies and their effectiveness in Q2 2024. The analysis aims to identify areas for improvement and inform future human resources initiatives. By examining our employee turnover rates and retention metrics, we can optimize our workforce management and drive business growth.

## Employee Engagement and Satisfaction Metrics

Our Q1 2024 employee satisfaction survey revealed a 25% increase in positive feedback regarding internal communication channels. Specifically, 85% of respondents praised the newly implemented company-wide newsletter. Furthermore, 90% of employees reported feeling informed about company goals and initiatives. These results demonstrate the effectiveness of our enhanced communication strategy.

## Q2 2024 Employee Turnover Rate Analysis

The recent implementation of a new HR management system has streamlined our onboarding process, reducing the average time-to-hire by 30% since Q3 2023. This improvement has allowed our recruitment team to focus on more strategic initiatives, such as enhancing our employer brand and developing targeted talent acquisition campaigns. As a result, we have seen a notable increase in high-quality job applicants. Our talent pipeline has grown by 20% over the past quarter.

## Training and Development Program Effectiveness

In 2023, we invested \$1.2 million in employee training programs, resulting in a 40% increase in internal promotions. Notably, our departmental cross-training initiative has led to a 25% reduction in interdepartmental communication issues. Additionally, our leadership development program has received a 95% satisfaction rating from participants, demonstrating its value in cultivating future leaders within the organization.

## Employee Recognition and Rewards Strategies

Our employee recognition program has seen significant growth, with a 50% increase in peer-to-peer recognition submissions since its inception in Q4 2022. Furthermore, our rewards platform has been utilized by 80% of employees, with the most popular redemption option being additional paid time off. These results indicate a strong culture of appreciation within the organization. We will continue to refine and expand our recognition and rewards offerings to drive engagement and motivation.

## Workforce Diversity and Inclusion Initiatives

As part of our ongoing commitment to diversity, equity, and inclusion, we have established partnerships with three minority-owned suppliers, resulting in a 15% increase in diverse vendor spend since Q1 2023. Our employee resource groups have also seen significant growth, with a 30% increase in membership over the past year. These initiatives have contributed to a more inclusive and diverse work environment, aligning with our organizational values.

## Conclusion

In conclusion, our Q2 2024 employee retention analysis highlights the need for targeted interventions to improve employee satisfaction and reduce turnover rates. By implementing evidence-based

strategies and enhancing our training and development programs, we can foster a more engaged and productive workforce. Recommendations for future initiatives will be presented to the HR leadership team for consideration. Ongoing monitoring and evaluation of our employee retention metrics will ensure that we remain on track to meet our business objectives.
