# Supplementary material
Source: ML conference proceedings conference paper supplement (https://openreview.net/forum?id=IGYQ4c92e2)
Supplement: supplementary_material [file employee-retention-report.pdf › drbench/data/tasks/DR0007/files/DI001/employee-retention-report.pdf]

# Employee Retention and Engagement Analysis Report

## Introduction

This report aims to provide insights into employee retention and engagement metrics within MediConn Solutions. Understanding the dynamics of our workforce is critical for sustaining our commitment to delivering exceptional virtual healthcare services. By evaluating various factors influencing our employee experience, we can identify areas for improvement and strategic initiatives. This document will inform leadership decisions and enhance our organizational effectiveness.

## Current Workforce Demographics Overview

As of September 2025, MediConn Solutions employs a diverse workforce comprising 40% healthcare professionals, 30% IT specialists, and 30% administrative staff. The average age of employees is 35 years, with a gender distribution of 60% female and 40% male. Notably, 25% of our workforce is bilingual, facilitating better communication with our diverse patient base. Additionally, 15% of employees have been with the company for over five years, showcasing our commitment to long-term career development.

## Factors Influencing Employee Satisfaction

Recent surveys indicate that 70% of employees value flexible working hours, which is a significant draw for talent in the virtual healthcare sector. Furthermore, 65% of employees appreciate our emphasis on continuous education, with 200 hours of training provided in the last year alone. Employee recognition programs have seen participation from 85% of staff, reinforcing a positive work environment. Lastly, 90% of employees reported satisfaction with our health benefits, which are routinely benchmarked against industry standards.

## Turnover Analysis and Insights

In Q2 2025, MediConn Solutions implemented a new onboarding process that reduced training time by 30%, enabling faster integration of new hires. Additionally, exit interviews revealed that 50% of departing employees cited relocation as their primary reason for leaving. Our retention strategies have included quarterly team-building activities, which saw an 80% participation rate this past quarter. Despite these efforts, we continue to monitor industry turnover trends, which remain at an average of 15% across the virtual healthcare sector.

## Conclusion

In summary, the analysis of our workforce reveals key trends affecting employee retention. Addressing the highlighted factors will be essential for improving our turnover rates and fostering a positive work environment. I recommend implementing targeted initiatives based on these insights to enhance employee engagement. Next steps should involve reviewing our current policies and assessing potential new strategies for staff retention.
