# Supplementary material
Source: ML conference proceedings conference paper supplement (https://openreview.net/forum?id=IGYQ4c92e2)
Supplement: supplementary_material [file Employee-Training-Budget-Analysis-2024.docx]

# Q1 2024 Employee Development Budget Analysis

## Introduction

This report provides an overview of our Q1 2024 employee training budget allocation, highlighting key areas of investment and their alignment with our company's strategic objectives.

## Employee Training Program Strategy

Our employee training program is designed to equip new hires with the necessary skills to excel in their roles. The program is structured to accommodate different learning styles and includes a blend of online and in-person training sessions. The program's success is measured by the number of employees who complete the training within a specified timeframe. This approach has been well-received by employees, with an 85% retention rate among new hires.

## Training Budget Allocation Breakdown

Historically, our training budget has been allocated across various departments, with an average of 30% going towards IT training. This allocation is based on the department's size and the number of employees who require training. For the past three years, we've seen a steady increase in training requests from the sales team, with a 25% increase in requests alone.

## Key Performance Indicator (KPI) Alignment

To measure the success of our training programs, we track key performance indicators such as course completion rates, training duration, and employee satisfaction. These metrics help us identify areas for improvement and make data-driven decisions. For instance, we've seen a 20% increase in employee satisfaction since implementing our new onboarding program.

## Training Needs Assessment and Analysis

To ensure our training programs meet the needs of our employees, we conduct regular training needs assessments. This involves gathering feedback from employees, analyzing training metrics, and identifying knowledge gaps. Based on the results, we adjust our training programs to better meet the needs of our employees.

## Budget Allocation by Department

Our budget allocation process is designed to be transparent and fair. Each department submits a training request, which is reviewed and approved by our training team. The approved requests are then allocated a specific budget, which is tracked and reported on a quarterly basis.

## Employee Training ROI and Evaluation

To ensure the effectiveness of our training programs, we conduct regular evaluations and track the return on investment (ROI). This involves measuring the impact of training on employee performance, productivity, and job satisfaction. For example, our recent onboarding program has resulted in a 15% increase in new hire productivity.

## Conclusion

In conclusion, our Q1 2024 employee training budget allocation reflects our commitment to developing a skilled and dedicated workforce. We recommend continued investment in training programs that demonstrate clear ROI and align with our company's strategic goals.
