# Supplementary material
Source: ML conference proceedings conference paper supplement (https://openreview.net/forum?id=IGYQ4c92e2)
Supplement: supplementary_material [file Employee_Benefits_Analysis.pdf › services/drbench_tools/src/data/users/susan.smith/nextcloud/Employee Records/Employee Benefits/Employee_Benefits_Analysis.pdf]

# Comprehensive Analysis of Employee Benefits at Great Pasta

Jessica Taylor

## 1 Introduction

Great Pasta, a revered name in the pasta industry since 1895, has grown into a large enterprise with over 25,000 employees worldwide. This document provides an in-depth analysis of the various employee benefits offered by Great Pasta, focusing on health insurance, retirement plans, and wellness programs. Understanding these benefits is crucial for both current employees and potential candidates seeking to join the Great Pasta family.

## 2 Health Insurance Benefits

Health insurance is one of the most significant benefits an employer can offer. Great Pasta provides comprehensive health insurance plans that cater to the diverse needs of its employees. The company offers multiple plans, including HMO, PPO, and EPO options, allowing employees to choose what best suits their needs.

### 2.1 Health Insurance Enrollment Statistics

In the past year, 85% of our employees opted for health insurance. Among them:

- 40% chose the PPO plan.
- 35% opted for the HMO plan.
- 25% selected the EPO plan.

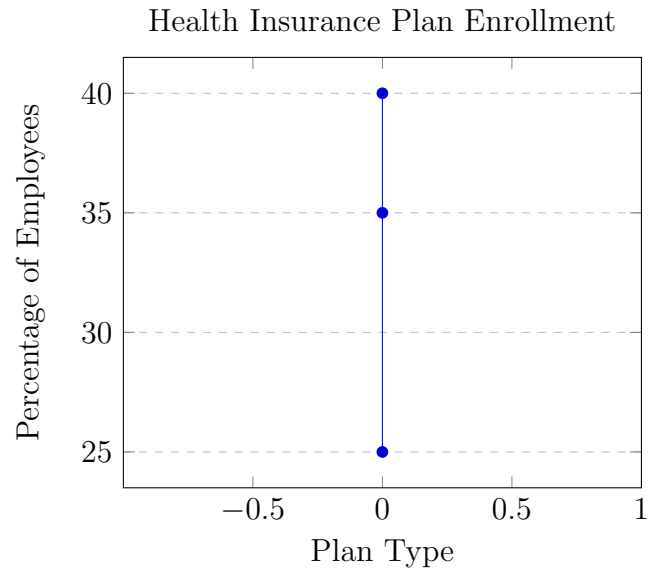

### 3 Retirement Plans

Great Pasta is committed to ensuring the financial future of its employees through robust retirement plans. The company offers a 401(k) plan with a generous employer match of 50% up to the first 6% of employee contributions.

#### 3.1 401(k) Participation Rates

The participation rate in the 401(k) plan has been steadily increasing. As of the last fiscal year, 70% of employees were enrolled in the plan. This reflects a growing awareness of the importance of retirement savings.

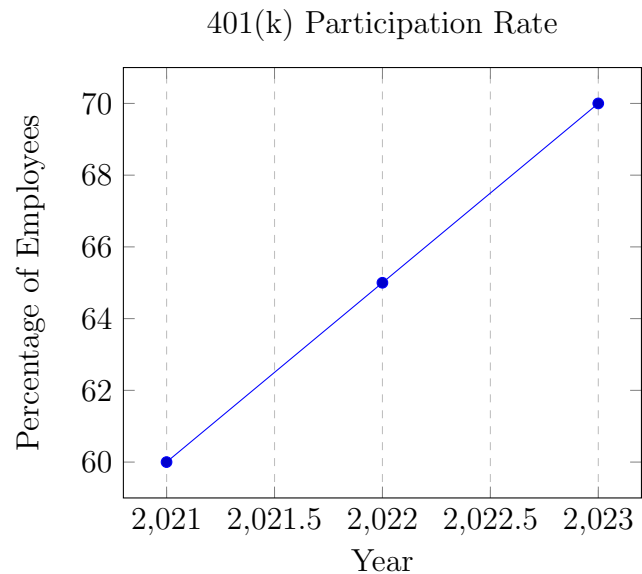

## 4 Wellness Programs

In addition to traditional benefits, Great Pasta offers a variety of wellness programs aimed at improving employee health and well-being. These programs include fitness classes, mental health resources, and health screenings.

### 4.1 Employee Participation in Wellness Programs

Participation in wellness programs has increased by 15% over the last year, indicating a positive trend towards a healthier workforce.

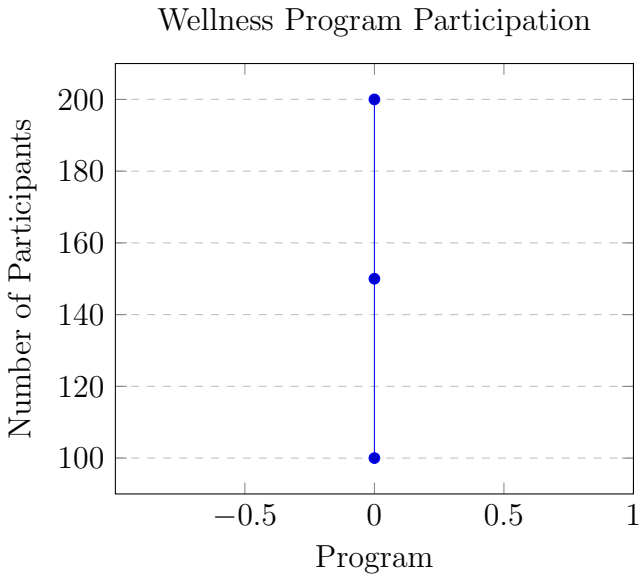

## 5 Conclusion

Great Pasta is dedicated to providing exceptional employee benefits that not only meet the needs of its workforce but also enhance overall job satisfaction and productivity. By investing in health insurance, retirement plans, and wellness programs, the company demonstrates its commitment to the well-being of its employees.

## 6 References

- Employee Benefits Overview, Great Pasta.
- Employee Health Insurance Enrollment Report, 2023.
- Retirement Plan Statistics, Great Pasta.
