# Supplementary material
Source: ML conference proceedings conference paper supplement (https://openreview.net/forum?id=IGYQ4c92e2)
Supplement: supplementary_material [file Employee_Benefits_Overview.pdf › services/drbench_tools/src/data/users/susan.smith/nextcloud/Employee Records/Employee Benefits/Employee_Benefits_Overview.pdf]

# Employee Benefits Overview at Great Pasta

Jordan Harris

October 2023

## 1 Introduction

Great Pasta, founded in 1895 and headquartered in Rome, Italy, has grown into one of the largest providers of pasta and Italian food products globally, employing over 25,000 people. One of the critical aspects of maintaining employee satisfaction and retention is the benefits package offered. This document explores the various employee benefits offered at Great Pasta, emphasizing health, wellness, retirement plans, and employee engagement initiatives.

## 2 Health and Wellness Benefits

At Great Pasta, the health and wellness of employees are paramount. The company provides a comprehensive health insurance plan covering medical, dental, and vision care. Employees can choose between several plans to best fit their individual or family needs.

### 2.1 Health Insurance Plan Options

The following table summarizes the different health insurance plans available to employees:

| Plan Type     | Monthly Premium | Deductible |
|---------------|-----------------|------------|
| Basic Plan    | €200            | €1,500     |
| Standard Plan | €350            | €1,000     |
| Premium Plan  | €500            | €500       |

### 2.2 Wellness Programs

In addition to standard health insurance, Great Pasta offers wellness programs that include:

- Gym memberships at discounted rates
- Annual health screenings and flu shots
- Mental health support through employee assistance programs

## 3 Retirement Benefits

The company also provides a retirement savings plan to assist employees in planning for their future. Great Pasta matches employee contributions up to 5

### 3.1 Retirement Plan Contributions

To visualize the impact of the company's matching contributions, we can look at the following bar chart, which illustrates the growth of an employee's retirement savings over time:

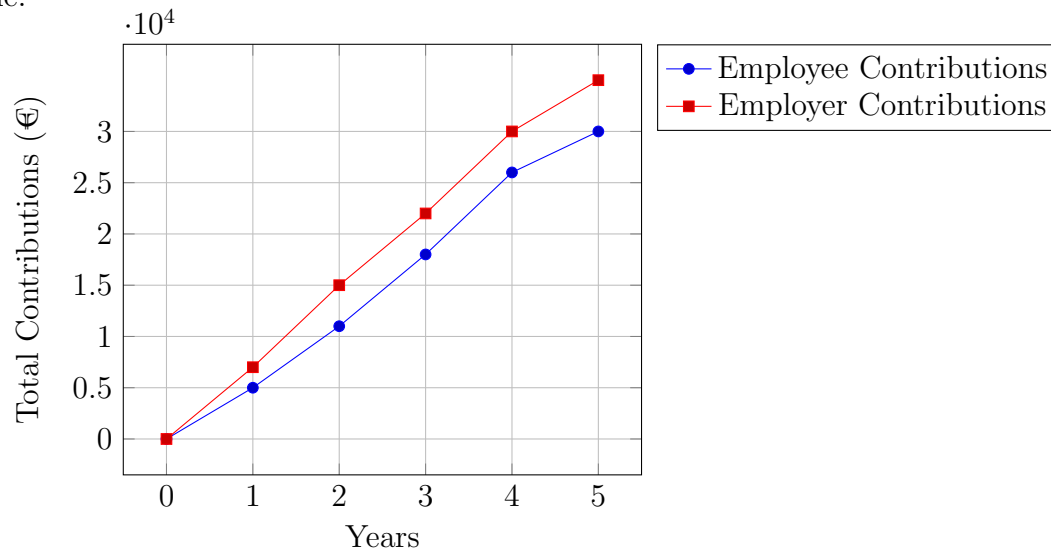

## 4 Employee Engagement Initiatives

Great Pasta believes that employee engagement is crucial to a productive workforce. The company runs various initiatives to keep employees motivated and connected.

### 4.1 Annual Employee Retreat

Each year, Great Pasta organizes an employee retreat focused on team-building activities and workshops to enhance skills and collaboration. The retreat takes place in scenic locations and includes activities such as:

- Team-building exercises
- Professional development workshops
- Networking opportunities

### 4.2 Recognition Programs

Great Pasta also has recognition programs to reward outstanding performance. Employees can be nominated for various awards based on their contributions. Winners receive:

- Certificates of achievement
- Monetary bonuses

- Feature in the company newsletter

## 5 Conclusion

In conclusion, the employee benefits package at Great Pasta is designed to support the health, financial security, and overall well-being of its employees. With a comprehensive health plan, a strong retirement savings plan, and engaging employee initiatives, Great Pasta continues to attract and retain top talent in the industry.

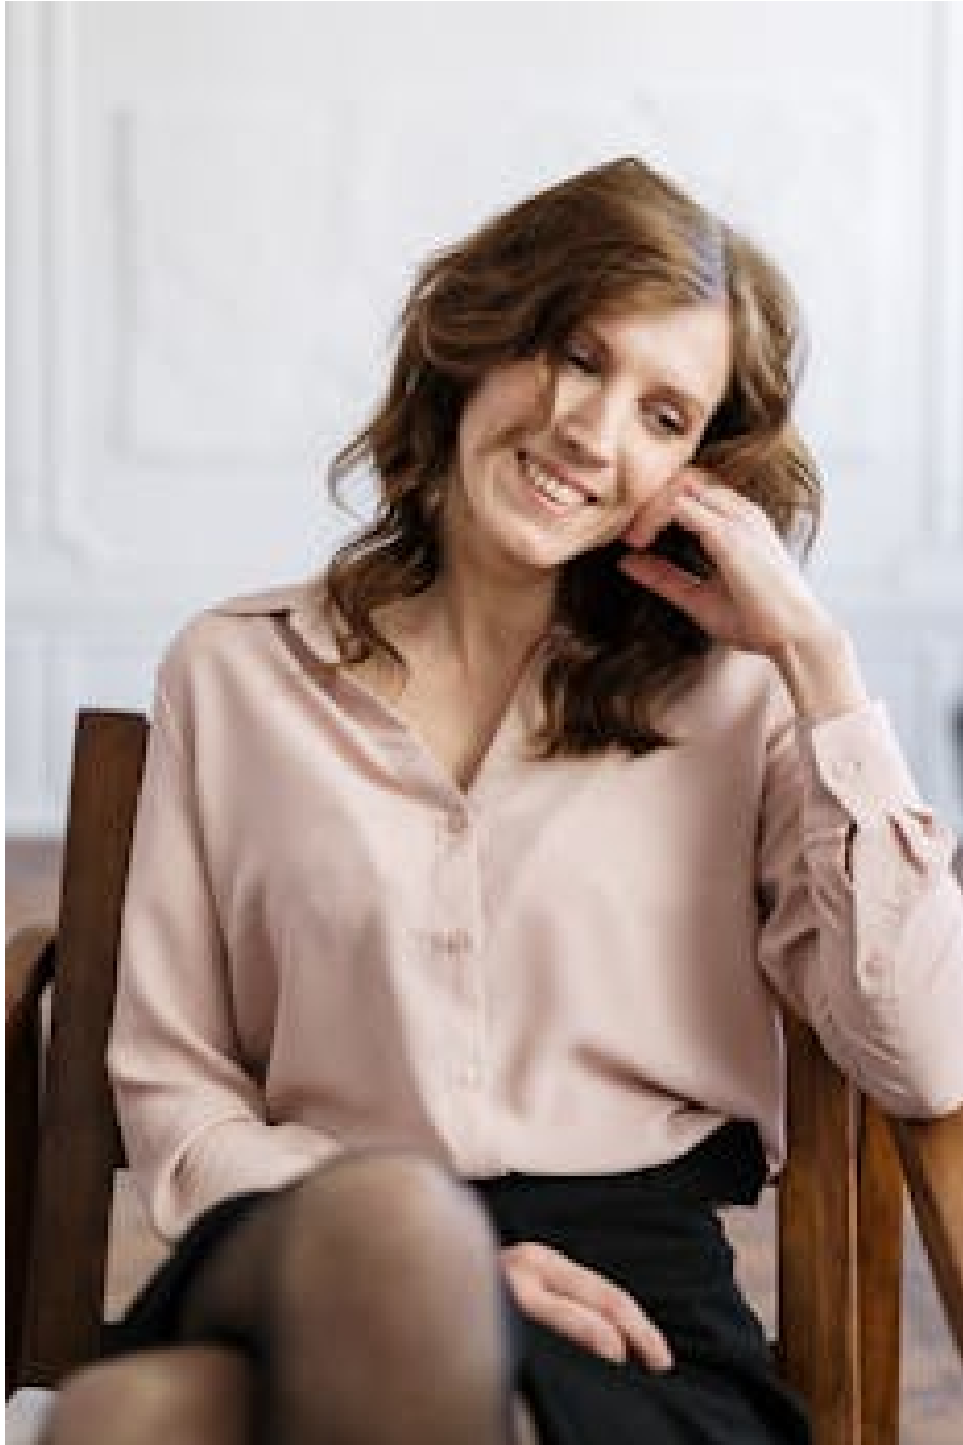

Figure 1: A wellness program in action at Great Pasta

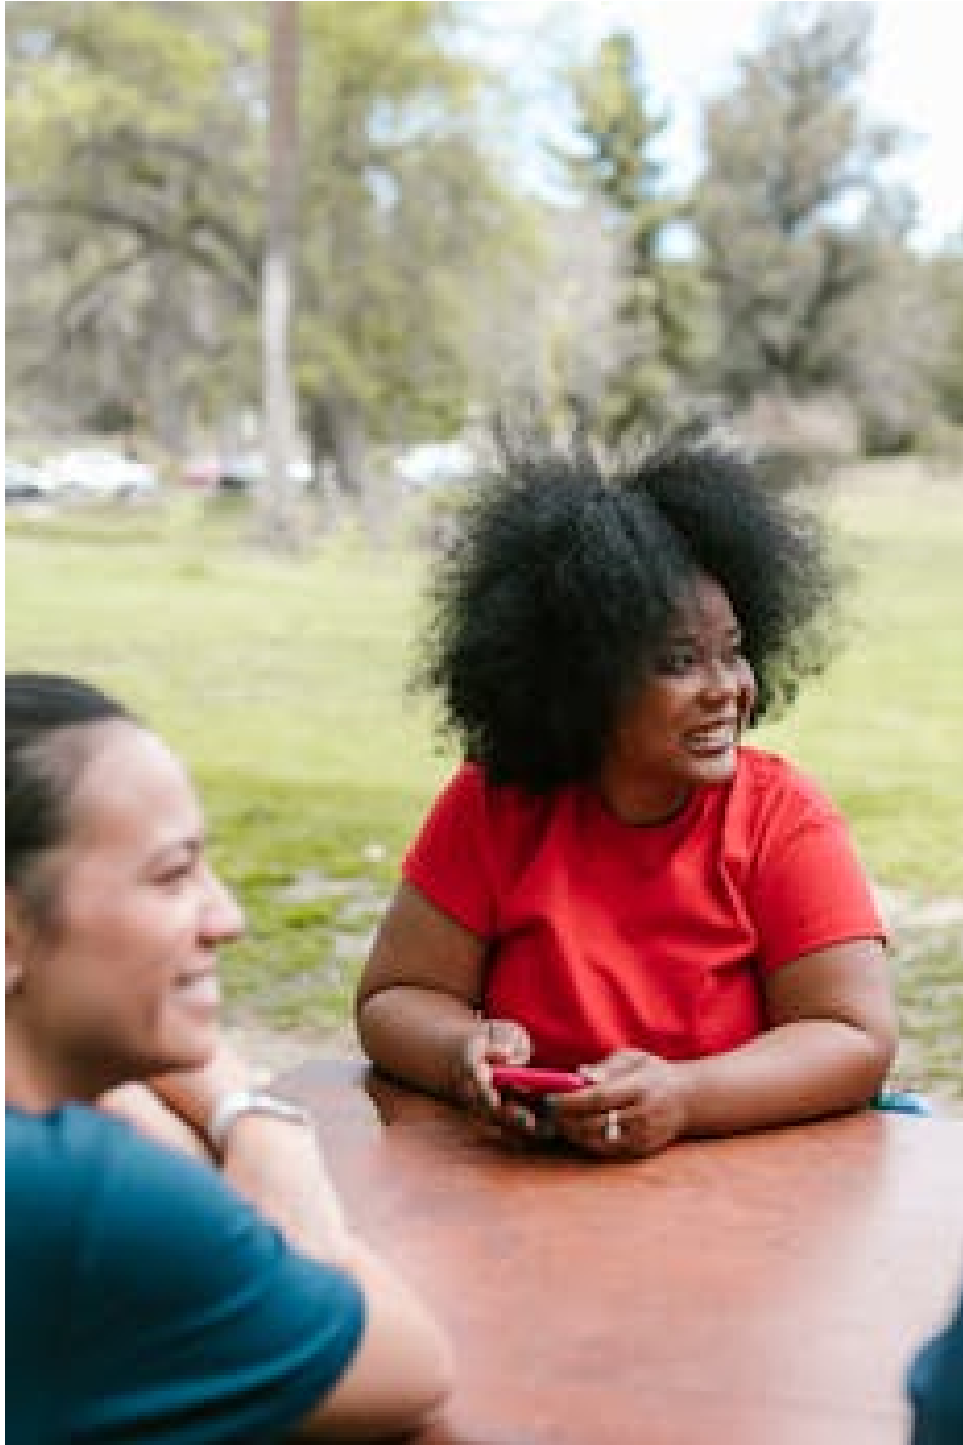

Figure 2: Team-building activities during the annual employee retreat

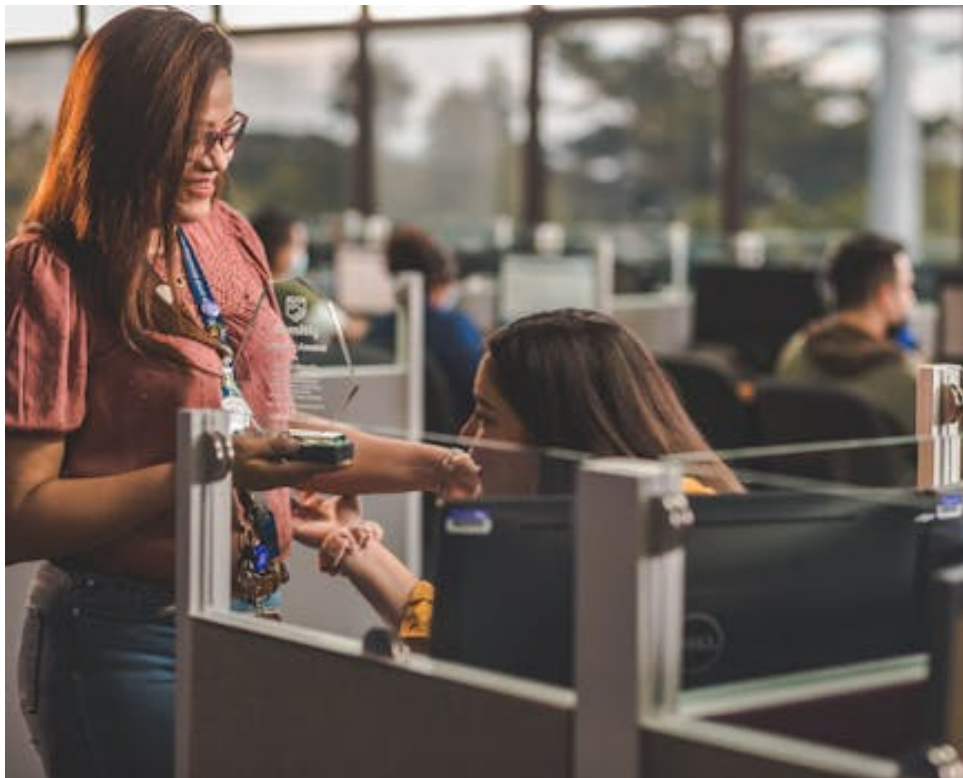

Figure 3: Employee recognition ceremony at Great Pasta
