# Supplementary material
Source: ML conference proceedings conference paper supplement (https://openreview.net/forum?id=IGYQ4c92e2)
Supplement: supplementary_material [file Employee_Commuting_Data_MediConn_Solutions.xlsx]

## Sheet: Employee_Commuting_Statistics
Quarter	Average_Commuting_Distance	Public_Transport_Usage	Employee_Count	Digital_Presence_Focus
The fiscal quarter for which the data is reported, e.g., Q1 2025, Q2 2025.	The average distance in miles that employees commute to work.	The percentage of employees using public transportation for commuting.	The total number of employees included in the commuting statistics for the given quarter.	Indicates if the company's focus in the given quarter was on digital presence and telehealth marketing.
Q1 2023	13.1	0.58	890	TRUE
Q3 2023	13.2	0.6	920	FALSE
Q2 2023	12.8	0.62	930	FALSE
Q1 2024	12	0.5	950	TRUE
Q2 2025	13	0.65	1150	TRUE
Q1 2025	12.5	0.6	1100	TRUE
Q4 2023	11	0.45	900	FALSE
Q4 2024	14	0.7	1000	FALSE
Q3 2024	13.5	0.55	1050	FALSE
Q2 2024	14.5	0.68	980	TRUE
Q3 2025	15	0.75	1200	FALSE
