# Supplementary material
Source: ML conference proceedings conference paper supplement (https://openreview.net/forum?id=IGYQ4c92e2)
Supplement: supplementary_material [file employee_performance_report.pdf › services/drbench_tools/src/data/users/susan.smith/nextcloud/Employee Records/employee_performance_report.pdf]

# Employee Performance Report - 2023

Jordan White

April 10, 2025

## 1 Introduction

The Employee Records directory for Great Pasta contains vital information about the workforce responsible for providing the best pasta in the world. Established in 1895, Great Pasta has grown into a large enterprise with over 25,000 employees. This document provides a detailed overview of employee performance, training programs, and productivity metrics.

## 2 Employee Overview

The Employee Records directory includes various files related to employees' performance. Each employee's record contains their name, position, performance ratings, and training history. For instance, Susan Smith, a senior quality control manager, is known for her meticulous attention to detail, contributing significantly to maintaining product quality at Great Pasta.

### 2.1 Sample Employee Record

Name: Susan Smith

Position: Senior Quality Control Manager

Performance Rating: 4.8/5

Training Completed: Food Safety, Quality Assurance

## 3 Performance Metrics

Performance metrics are crucial for assessing employee contributions. The following chart illustrates the average performance rating of employees across different departments:

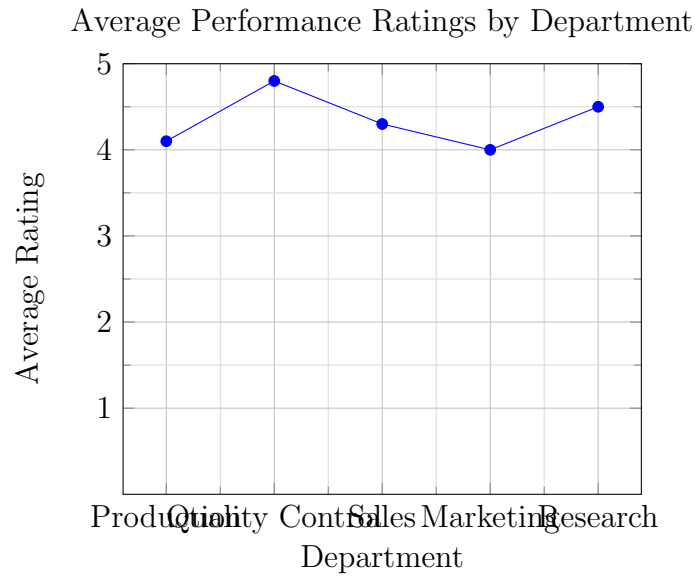

The Quality Control department stands out with an impressive average performance rating of 4.8. This performance is indicative of the rigorous training and supervision provided to ensure product excellence.

## 4 Training Programs

Great Pasta invests heavily in employee training to maintain its competitive edge. Training programs are tailored to address specific departmental needs. For example, the Quality Control team undergoes regular training in food safety and quality assurance. In 2023, the company allocated 15

### 4.1 Training Budget Allocation

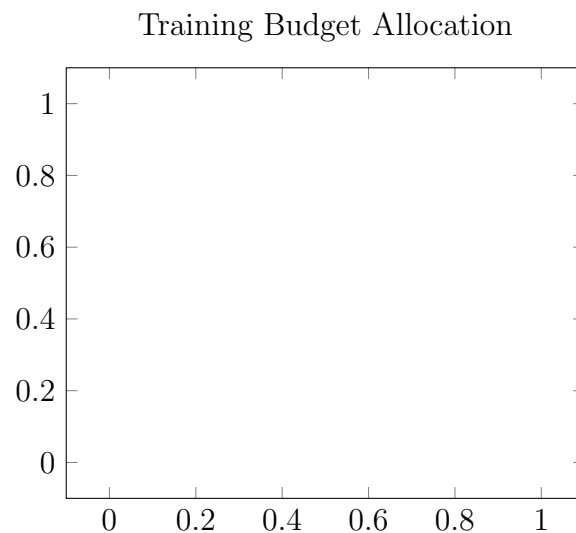

The pie chart above shows the allocation of the training budget for 2023, emphasizing the focus on seminars and workshops that foster team collaboration.

## 5 Employee Satisfaction

Employee satisfaction is a crucial factor for productivity and retention. According to a recent survey, 82

## 6 Conclusion

The data presented in this document highlights the commitment of Great Pasta to develop its workforce continually. With significant investments in training and a robust performance evaluation system, the company not only maintains high standards in the production of its products but also fosters a positive work environment for its employees.

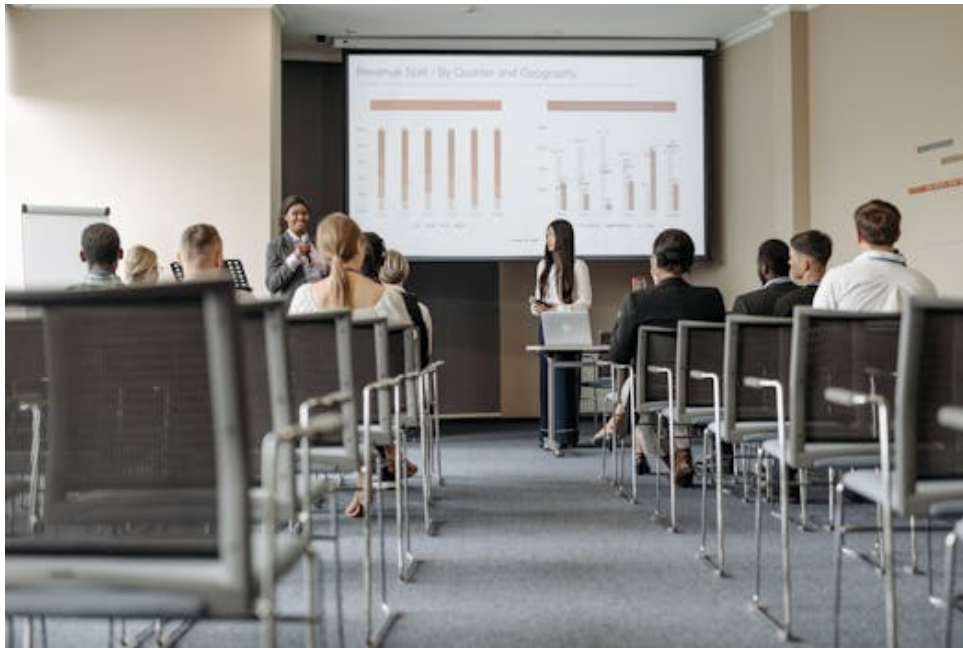

Figure 1: Great Pasta employees during a training seminar.

## References

- Employee Performance Report 2023
- Great Pasta Training and Development Program
