# Supplementary material
Source: ML conference proceedings conference paper supplement (https://openreview.net/forum?id=IGYQ4c92e2)
Supplement: supplementary_material [file energy-consumption-review.pdf › drbench/data/tasks/DR0001/files/DI003_pdf/energy-consumption-review.pdf]

# Q1 2024 Energy Consumption Review

## Introduction

As part of Lee's Market's ongoing sustainability efforts, this report aims to provide an overview of our energy consumption trends and identify areas for improvement. With our growing footprint across the U.S. and Canada, it is essential that we monitor and optimize our energy usage to minimize our environmental impact. This report will examine our energy consumption patterns in Q1 2024 and provide recommendations for future reductions. By analyzing our energy usage, we can better understand our operational efficiency and make data-driven decisions.

## Energy Efficiency Initiatives and Best Practices

As part of our ongoing commitment to sustainability, Lee's Market has implemented a comprehensive LED lighting retrofit program across 80% of our locations. This initiative, launched in Q3 2022, has not only improved store ambiance but also contributed to a 12% reduction in our overall lighting energy expenditure. Our facilities management team continues to monitor and optimize lighting usage patterns to identify further opportunities for improvement. By the end of 2023, we anticipate that all locations will have transitioned to energy-efficient LED lighting.

## Store Design and Layout Impact on Energy Consumption

Lee's Market has been working closely with our architectural partners to develop a new store design concept that incorporates natural daylighting and optimized HVAC systems. This new design, set to debut in our upcoming locations, aims to reduce energy consumption while enhancing the overall shopping experience. In our most recent customer survey, 75% of respondents indicated a preference for stores with natural lighting, aligning with our design goals. By incorporating these design elements, we expect to improve customer satisfaction and loyalty.

## Employee Engagement and Training on Sustainability

In Q2 2023, Lee's Market launched a comprehensive employee training program focused on sustainability and energy efficiency best practices. To date, over 90% of our employees have completed the training, which covers topics such as energy-efficient equipment operation and waste reduction strategies. Our internal 'Green Team' has also been instrumental in promoting eco-friendly practices throughout the organization, including implementing recycling programs and reducing paper usage. We believe that engaging our employees in sustainability efforts is crucial to driving meaningful change.

## Q1 2024 Energy Consumption Metrics and Trends

As we continue to expand our online shopping platform, we have seen a notable increase in customer engagement, with a 25% rise in website traffic during Q1 2024. This growth has led to an expansion of our e-commerce team, with four new positions added in the first quarter. Our marketing department has also launched targeted social media campaigns, resulting in a 15% increase in followers across our platforms. These efforts have contributed to a significant boost in online sales, which now account for 10% of our total revenue.

## Renewable Energy Sources and Cost-Benefit Analysis

Lee's Market has been exploring opportunities to integrate renewable energy sources into our operations, with a focus on solar power. In 2022, we conducted a feasibility study to assess the potential for rooftop solar installations at our warehouse facilities. While the initial investment costs were found to be prohibitively high, we continue to monitor advancements in solar technology and

incentives that could make such a project more viable in the future. Our sustainability team is also investigating alternative renewable energy options, including wind power and geothermal energy.

## Conclusion

In conclusion, our Q1 2024 energy consumption review highlights the importance of continued monitoring and optimization of our energy usage. By implementing energy-efficient initiatives and engaging employees in sustainability efforts, we can reduce our environmental impact and improve operational efficiency. Recommendations from this report will be used to inform future sustainability initiatives and track progress towards our energy reduction goals. Next steps will include developing a comprehensive sustainability plan and conducting regular energy audits to ensure continued improvement.
