# Supplementary material
Source: ML conference proceedings conference paper supplement (https://openreview.net/forum?id=IGYQ4c92e2)
Supplement: supplementary_material [file energy-cost-report.pdf › drbench/data/tasks/DR0005/files/DI002_pdf/energy-cost-report.pdf]

# Q3 2023 Energy Cost Analysis Report

## Introduction

As part of our ongoing efforts to optimize operational efficiency and reduce costs, this report provides an overview of Lee's Market energy consumption patterns for Q3 2023. The purpose of this analysis is to identify areas of improvement and inform strategic decisions related to energy management. Our team has compiled data from various sources to provide a comprehensive understanding of our energy usage. This report is intended for internal stakeholders, including store managers and facilities teams.

## Energy Consumption Trends in Retail Industry

The retail industry has seen a significant shift towards energy-efficient practices over the past decade. According to a study published in 2020, the average retailer has reduced energy consumption by 15% through the implementation of LED lighting and smart HVAC systems. Furthermore, the use of data analytics has enabled retailers to identify areas of inefficiency and optimize energy usage. As of 2022, over 70% of retailers reported having a comprehensive energy management strategy in place.

## Store-Level Energy Efficiency Initiatives

Lee's Market has been actively promoting energy-efficient practices through employee training programs. Since 2018, over 500 employees have participated in our 'Green Team' initiative, which focuses on reducing waste and conserving energy. The program has resulted in a 20% reduction in paper waste and a 5% reduction in water consumption. Our goal is to expand the program to all locations by the end of 2024.

## Average Store Energy Cost Performance Metrics

Our customer satisfaction surveys have shown a strong correlation between store cleanliness and customer loyalty. In Q2 2023, we implemented a new janitorial services contract, resulting in a 12% reduction in customer complaints related to store cleanliness. Additionally, our mystery shopping program has reported a 9% increase in store appearance ratings. We will continue to monitor these metrics to ensure our stores meet the highest standards.

## Energy Management System Implementation Roadmap

The IT department has been working on upgrading our inventory management system to improve supply chain efficiency. The new system, set to launch in Q1 2024, will enable real-time tracking of inventory levels and automate ordering processes. This upgrade is expected to reduce stockouts by 10% and overstocking by 8%. Our suppliers have been notified of the changes and are working closely with us to ensure a seamless transition.

## Recommendations for Future Energy Savings

Our marketing team has been exploring opportunities to increase customer engagement through in-store events. In 2022, we hosted over 50 events, including cooking demonstrations and cultural festivals, which resulted in a 15% increase in foot traffic. We plan to expand our event calendar to include more sustainability-focused events, such as recycling workshops and energy-efficient product showcases.

## Conclusion

In conclusion, our analysis highlights the importance of ongoing energy management efforts to reduce costs and minimize our environmental footprint. We recommend implementing energy-efficient lighting

solutions and optimizing HVAC systems across our stores. Additionally, we suggest conducting regular energy audits to identify opportunities for improvement. By taking these steps, we can reduce our energy costs and align with our company's sustainability goals.
