# Supplementary material
Source: ML conference proceedings conference paper supplement (https://openreview.net/forum?id=IGYQ4c92e2)
Supplement: supplementary_material [file Engagement-Insights-2025.docx]

# Employee Engagement Insights and Analysis Report-2025

## Introduction

In recent years, Elexion Automotive has prioritized employee engagement as a key driver of success. This report provides an analysis of our Q1 2025 employee engagement survey response rate, offering valuable insights for improving our internal communication and employee satisfaction strategies.

## Employee Feedback Methodology

Elexion Automotive's employee feedback methodology is built around a quarterly feedback loop, with a dedicated feedback team responsible for collecting and analyzing employee input. This structured approach ensures that all employee feedback is captured and addressed in a timely manner.

## Survey Design and Content

The survey design and content are carefully crafted to capture a range of employee opinions, with a focus on open-ended questions and multiple-choice options. This allows for a more comprehensive understanding of employee sentiment and concerns.

## Participation Trends and Insights

In recent years, Elexion Automotive has seen an increase in participation rates across all departments, with a notable exception being the Research and Development team, where participation rates have remained steady.

## Actionable Recommendations for Improvement

To further improve employee engagement, Elexion Automotive recommends implementing a mentorship program, providing additional training opportunities, and enhancing company-wide communication channels.

## Q1 2025 Employee Engagement Survey Results

As part of Elexion Automotive's ongoing efforts to improve employee engagement, the company has established a quarterly survey schedule, with the next survey scheduled for Q2 2025. This will provide valuable insights into employee sentiment and concerns.

## Conclusion

This report highlights the importance of effective employee engagement strategies in the electric vehicle industry. We recommend implementing the proposed solutions to enhance our internal communication and employee satisfaction, ultimately driving business success. Key takeaways and next steps will inform our future HR initiatives.
