# Supplementary material
Source: ML conference proceedings conference paper supplement (https://openreview.net/forum?id=IGYQ4c92e2)
Supplement: supplementary_material [file engineering-talent-report.pdf › drbench/data/tasks/DR0015/files/qa_1755719913/engineering-talent-report.pdf]

# Q1 2025 Engineering Talent Acquisition Report

## Introduction

As we continue to drive innovation in the electric vehicle market, attracting top engineering talent is crucial to our success. This report provides an overview of our engineering talent acquisition efforts in Q1 2025, highlighting key trends and areas for improvement. The insights presented in this report will inform our recruitment strategies and ensure we remain competitive in the market. By analyzing our hiring processes, we can optimize our approach to talent acquisition and drive business growth.

## Engineering Talent Pipeline Development Strategies

To ensure a robust talent pipeline, Elexion Automotive's recruitment team has been actively engaging with top engineering universities since Q3 2023, resulting in a 25% increase in qualified internship applications. This effort has also led to the development of a comprehensive mentorship program, which is set to launch in Q2 2025. The program will pair experienced engineers with new hires, fostering a culture of knowledge sharing and growth. Additionally, the team has been exploring partnerships with industry-recognized certification programs to further enhance the skills of our engineering talent pool.

## New Hire Onboarding Process Efficiency Analysis

A recent analysis of our onboarding process revealed that new hires who completed the comprehensive 6-week training program demonstrated a 30% faster ramp-up time compared to those who did not. Furthermore, feedback from the Q4 2024 new hire cohort indicated a 90% satisfaction rate with the onboarding process, citing the program's structure and support as key factors. The HR team is now working to integrate AI-powered training modules to further enhance the onboarding experience. This initiative aims to reduce the overall onboarding time by 20% and increase new hire productivity.

## Time-to-Hire Metrics and Industry Benchmarking

According to a recent industry report, the adoption of AI-powered recruitment tools has increased by 40% among top automotive manufacturers since 2022. Elexion Automotive has been at the forefront of this trend, implementing an AI-driven applicant tracking system in Q1 2024. This system has streamlined the recruitment process, enabling the team to process 50% more applications within the same timeframe. Additionally, the system's advanced analytics capabilities have provided valuable insights into candidate behavior and preferences.

## Conclusion

In conclusion, our Q1 2025 engineering talent acquisition efforts have shown promising results, but there are opportunities for improvement. By streamlining our hiring processes and investing in targeted recruitment initiatives, we can reduce our time-to-hire and attract top talent in the industry. Recommendations for future improvements will be presented to the recruitment team and implemented in Q2 2025. Regular monitoring of our talent acquisition metrics will ensure we remain on track to meet our business objectives.
