# Supplementary material
Source: ML conference proceedings conference paper supplement (https://openreview.net/forum?id=IGYQ4c92e2)
Supplement: supplementary_material [file ev-battery-management-strategies.docx]

# Optimizing EV Battery Management Systems

## Introduction

As we continue to innovate in the field of electric vehicle technology, it is essential to ensure the longevity and performance of our battery management systems. This report outlines potential strategies for improving battery lifespan and reducing maintenance costs. As a Junior Advanced Technology Engineer in the Engineering and Technology department, I am excited to share my findings and recommendations. Please find below a comprehensive analysis of the benefits and challenges associated with AI-enhanced battery management.

## Advanced Driver-Assistance System Development

The development of advanced driver-assistance systems requires a deep understanding of the complexities involved in vehicle design and testing. Our team of experts has been working closely with industry partners to ensure that our systems meet the highest standards of safety and performance. This has involved conducting rigorous testing and simulation, as well as collaborating with regulatory bodies to ensure compliance with industry guidelines. As a result, our vehicles are equipped with a range of features designed to improve safety and reduce the risk of accidents.

## Vehicle-to-Grid Charging Implementation

The implementation of vehicle-to-grid charging technology has been a key area of focus for Elexion Automotive, with a range of benefits for both our customers and the environment. Our team has been working closely with energy providers to develop a seamless charging experience, while also exploring opportunities to integrate our technology with existing infrastructure. This has involved conducting extensive research and testing, as well as collaborating with industry partners to identify the most effective solutions. As a result, we are well-positioned to capitalize on the growing demand for sustainable energy solutions.

## Battery Management System Limitations

The development of advanced battery management systems is a complex and ongoing process, with a range of challenges and limitations to overcome. Our team has been working closely with industry partners to identify the most effective solutions, while also exploring new technologies and innovations. This has involved conducting extensive research and testing, as well as collaborating with regulatory bodies to ensure compliance with industry guidelines. As a result, we are well-positioned to capitalize on the growing demand for sustainable energy solutions.

## AI-Enhanced Predictive Maintenance

The integration of AI-enhanced predictive maintenance solutions has been a key area of focus for Elexion Automotive, with a range of benefits for both our customers and our business. Our team has been working closely with industry partners to develop a range of predictive maintenance solutions, while also exploring opportunities to integrate our technology with existing infrastructure. This has involved conducting extensive research and testing, as well as collaborating with industry partners to identify the most effective solutions. As a result, we are well-positioned to capitalize on the growing demand for predictive maintenance solutions.

## Evolution of Electric Vehicle Technology

As we continue to drive innovation in electric vehicle technology, our analysis reveals that 35% of our current EV battery design features AI-enhanced battery management for our North American market, a significant milestone as of Q2 2024. This milestone underscores the importance of AI-enhanced battery management in extending EV battery lifespan. With this foundation, we can further explore opportunities to improve EV battery lifespan by leveraging AI-enhanced battery management to achieve a 15% increase.

## Conclusion

In conclusion, the integration of AI technology into our battery management systems has the potential to significantly extend battery lifespan. To fully leverage this technology, we must prioritize research and development, invest in emerging technologies, and collaborate with industry partners. As a next step, I recommend conducting a thorough analysis of existing AI-powered predictive maintenance solutions and their potential application to our battery management systems. This will enable us to optimize our battery management system and improve overall fleet performance.
