# Supplementary material
Source: ML conference proceedings conference paper supplement (https://openreview.net/forum?id=IGYQ4c92e2)
Supplement: supplementary_material [file EV-Battery-Optimization-Strategy.docx]

# Enhancing Electric Vehicle Battery Performance

## Introduction

As we continue to push the boundaries of electric vehicle technology, optimizing battery performance becomes increasingly crucial. As an Advanced Technology Engineer, I will explore the potential benefits of AI-enhanced battery management in this report.

## A Critical Analysis of Existing Battery Management Systems

The Elexion Automotive battery management system has undergone significant upgrades over the past few years. In 2018, we implemented a new software update that improved system performance by 8%. This was achieved through a combination of hardware and software upgrades, including the integration of advanced sensors and real-time data analysis. The new system has been well-received by our customers and has helped to increase overall vehicle efficiency.

## Leveraging Data-Driven Insights for Battery Health

Our analysis of the current fleet's performance reveals that the average battery lifespan as of Q3 2025 is 6.8 years, which is crucial information for determining the potential impact of AI-enhanced battery management on extending battery life. This data-driven insight highlights the importance of optimizing battery health to maximize the overall performance and efficiency of our electric vehicles. Furthermore, this finding underscores the need for continued research and development in advanced battery management systems that can effectively predict and maintain State-of-Health, ultimately leading to a longer battery lifespan.

## The Role of Advanced Driver-Assistance Systems in Battery Performance

Our research and development team has been exploring the potential applications of advanced driver-assistance systems (ADAS) in our vehicles. In particular, we're interested in how ADAS can improve vehicle safety and reduce the risk of accidents. By integrating features like lane departure warning and forward collision warning, we believe we can create a safer and more enjoyable driving experience for our customers.

## Mitigating Thermal Stress in Electric Vehicle Batteries

Our vehicle design team has been working on optimizing the thermal management system in our electric vehicles. This involves carefully designing the cooling system to ensure optimal temperatures are maintained throughout the battery pack. By doing so, we aim to reduce the risk of thermal stress and extend the lifespan of our batteries.

## Unlocking the Potential of AI-Enhanced Battery Management

Elexion Automotive is committed to staying at the forefront of technological innovation. In this context, our research and development team has been exploring the potential applications of artificial intelligence (AI) in our battery management systems. By leveraging AI, we believe we can improve the overall performance and efficiency of our vehicles. This could involve developing predictive maintenance schedules and real-time performance monitoring, among other applications.

## Conclusion

In conclusion, AI-enhanced battery management holds significant potential for improving EV battery lifespan. To further explore this concept, I recommend conducting a thorough feasibility study and collaborating with cross-functional teams to develop a prototype.
