# Supplementary material
Source: ML conference proceedings conference paper supplement (https://openreview.net/forum?id=IGYQ4c92e2)
Supplement: supplementary_material [file ev-cybersecurity-strategy.pdf › drbench/data/tasks/DR0013/files/qa_1755714060/ev-cybersecurity-strategy.pdf]

# Cybersecurity Strategy for Connected Electric Vehicles

## Introduction

As Elexion Automotive continues to innovate in the electric vehicle (EV) space, the importance of robust cybersecurity measures cannot be overstated. Connected and autonomous technologies introduce new risks and challenges that must be addressed proactively. This document aims to provide a comprehensive overview of the key considerations and recommendations for implementing an effective cybersecurity strategy for our EVs. By doing so, we can ensure the protection of our customers' data and the integrity of our vehicles' systems.

## Regulatory Compliance and Industry Standards for Cybersecurity

As of January 2023, Elexion Automotive has maintained a 95% compliance rate with relevant industry standards for data protection and cybersecurity. Our regulatory affairs team engages in bi-annual reviews of emerging legislation and collaborates closely with government agencies to ensure seamless integration of new requirements. This proactive approach has enabled us to avoid costly penalties and maintain a positive reputation among our customer base. We anticipate continued investment in compliance efforts as the regulatory landscape evolves.

## Risk Assessment and Threat Modeling for EV Systems

Our Q2 2024 cybersecurity incident analysis revealed a notable trend in our Vehicle-to-Everything (V2X) systems. Specifically, we identified and mitigated two security incidents that compromised the integrity of our connected EV ecosystem. These incidents underscore the importance of proactive threat modeling and risk assessment in our EV systems, particularly as we expand our V2X capabilities. By understanding the vulnerabilities and threats associated with our connected vehicles, we can refine our cybersecurity strategy to prevent similar incidents in the future. This data-driven approach will enable us to stay ahead of emerging threats and protect our customers' safety and data privacy.

## Vehicle-to-Everything (V2X) Communication Security Considerations

In the past year, our research and development team has explored the application of advanced materials in EV manufacturing, resulting in a 10% reduction in production costs. This innovation has also led to improved vehicle durability and enhanced customer satisfaction ratings. As we continue to refine our V2X communication protocols, we recognize the importance of integrating these advancements with emerging technologies. By doing so, we can create a more holistic and efficient manufacturing process.

## Implementing a Defense-in-Depth Approach to EV Cybersecurity

Our IT department has successfully implemented a company-wide training program, resulting in a 40% increase in employee awareness of cybersecurity best practices. This initiative has significantly reduced the risk of human error-related security breaches and fostered a culture of cybersecurity responsibility. We plan to expand this program to include specialized training for our EV engineering teams, further solidifying our commitment to a defense-in-depth approach. By empowering our employees, we can better protect our systems and data.

# Incident Response and Disaster Recovery Planning for EVs

In response to the increasing demand for our EV models, we have expanded our customer support team by 25% in the past quarter. This growth has enabled us to improve our response times and provide more comprehensive assistance to our customers. Our incident response plan has been updated to reflect this change, ensuring that our customers receive timely and effective support in the event of an issue. We continue to monitor customer feedback and adjust our support strategy accordingly.

## Conclusion

In conclusion, a comprehensive cybersecurity strategy for Elexion Automotive's electric vehicles is crucial to mitigating the risks associated with connected and autonomous technologies. By implementing a defense-in-depth approach, ensuring regulatory compliance, and prioritizing incident response planning, we can protect our customers' data and maintain the trust they have placed in our brand. Next steps include conducting a thorough risk assessment and developing a detailed implementation plan for the recommended cybersecurity measures.
