# Supplementary material
Source: ML conference proceedings conference paper supplement (https://openreview.net/forum?id=IGYQ4c92e2)
Supplement: supplementary_material [file Fac-Maint-Rep-2024-Q1.docx]

# Facility Maintenance and Repair Report Q1 2024

## Introduction

This report provides an overview of facility maintenance and repair expenses for the first quarter of 2024, aiming to inform strategic decisions and optimize resource allocation.

## Facilities Management Overview

Our facilities management team has been working closely with the real estate department to identify potential cost savings opportunities through efficient energy consumption and waste reduction strategies. This collaborative approach has resulted in a 12% reduction in energy costs over the past year. We are committed to maintaining a sustainable and environmentally responsible approach to our operations. By leveraging the latest technologies and best practices, we can minimize our carbon footprint and contribute to a healthier planet.

## Property Insurance and Liability Considerations

As we continue to expand our operations, it's essential to review and update our property insurance policies to ensure adequate coverage for our growing asset base. Our risk management team is working closely with our insurance providers to identify potential gaps in coverage and develop strategies to mitigate these risks. This proactive approach will help ensure the financial security of our organization and protect our stakeholders from unforeseen events.

## Maintenance and Repair Budget Analysis

Our budgeting process involves careful consideration of various factors, including historical spending patterns, market trends, and regulatory requirements. By analyzing these variables, we can identify areas for cost savings and make informed decisions about resource allocation. This data-driven approach has enabled us to optimize our maintenance and repair expenses, ensuring we are using our resources efficiently and effectively.

## Facility Condition Assessments and Recommendations

Regular facility condition assessments are crucial for identifying potential issues before they become major problems. Our team of experienced professionals conducts thorough inspections of our properties, assessing the condition of various systems, including HVAC, electrical, and plumbing. These assessments enable us to prioritize maintenance and repairs, ensuring the safety and efficiency of our operations.

## Facility Maintenance and Repair Expenses by Quarter

Our quarterly expenses for maintenance and repair services have been steadily increasing over the past two years, reflecting the growth and expansion of our operations. This trend is expected to continue as we continue to invest in our infrastructure and enhance our facilities to meet the evolving needs of our stakeholders.

## Conclusion

This report highlights the importance of regular facility maintenance and repair to ensure optimal performance and extended asset lifespan, while also identifying areas for cost reduction and process improvement. Future reports will focus on optimizing facility maintenance and repair schedules to minimize downtime and maximize resource allocation.
