# Supplementary material
Source: ML conference proceedings conference paper supplement (https://openreview.net/forum?id=IGYQ4c92e2)
Supplement: supplementary_material [file Fac-Maintenance-2024.docx]

# Facilities Maintenance Operations Report 2024

## Introduction

This report provides an overview of our facilities maintenance costs in 2024, highlighting key trends and insights to inform future budgeting and resource allocation.

## Maintenance Schedule and Compliance

Our maintenance schedule is designed to ensure compliance with regulatory requirements, including regular equipment inspections and staff training. This proactive approach helps prevent potential issues and reduces downtime. By staying ahead of potential problems, we can minimize the risk of reputational damage and maintain a high level of patient satisfaction. In 2022, we successfully completed a thorough facility inspection, identifying and addressing several minor issues before they became major problems.

## Facilities Asset Management

Our facilities asset management team is responsible for tracking and maintaining the condition of our physical infrastructure, including HVAC systems, electrical equipment, and plumbing. This involves regular inspections, preventative maintenance, and capital improvements to ensure the long-term viability of our operations. This proactive approach has allowed us to reduce energy consumption by 15% over the past two years, resulting in significant cost savings.

## Maintenance Cost Analysis

Our internal audit team conducted a comprehensive review of our financials in 2023, identifying areas for improvement and potential cost savings. This analysis helped us refine our budgeting process, ensuring that we are allocating resources effectively and making the most of our limited budget. By streamlining our operations, we were able to reduce administrative costs by 12% over the past year.

## 2024 Budget vs. Actual Comparison

In 2024, we faced unexpected challenges, including a global pandemic and supply chain disruptions. These external factors impacted our operations, resulting in a 5% reduction in patient volume. Despite these challenges, our team worked tirelessly to maintain high-quality care, and our patient satisfaction ratings remained unchanged. This resilience is a testament to our team's dedication and commitment to our mission.

## Maintenance Cost Reduction Strategies

We have implemented various cost reduction strategies, including energy-efficient lighting, optimized HVAC systems, and waste reduction initiatives. These efforts have resulted in significant cost savings, allowing us to reallocate funds to more critical areas of our operations. Our commitment to sustainability also helps us reduce our environmental footprint, aligning with our values and mission.

## Conclusion

This report summarizes the key findings and recommendations for optimizing facilities maintenance costs, highlighting the need for effective budgeting and strategic planning to ensure efficient operations.
