# Supplementary material
Source: ML conference proceedings conference paper supplement (https://openreview.net/forum?id=IGYQ4c92e2)
Supplement: supplementary_material [file Facilities-Maintenance-Cost.docx]

# Facilities Maintenance Cost Analysis Report

## Introduction

This report provides an in-depth analysis of facilities maintenance costs, highlighting trends and best practices to optimize resource allocation within Lee's Market's growing network of stores.

## Maintenance Budget Allocations by Region

Lee's Market's maintenance budget is allocated regionally, with 35% dedicated to the East Coast and 25% to the West Coast. The remaining 40% is allocated to the Midwest and South. This allocation is based on the company's sales data and market analysis.

## Facilities Maintenance Frequency and Scheduling

The maintenance team at Lee's Market schedules regular inspections and maintenance checks for all facilities. These checks are performed bi-weekly, with more frequent inspections for high-traffic areas. The team also conducts annual deep cleans and sanitizations for all facilities.

## Average Cost of Common Maintenance Issues

Common maintenance issues at Lee's Market include clogged drains, faulty lighting, and damaged shelving. The average cost to repair these issues is $500-$1,000, depending on the severity and location. The company's maintenance team prioritizes these repairs based on customer impact and business continuity.

## Comparison of On-Site vs. Outsourced Maintenance Services

Lee's Market has a mix of on-site and outsourced maintenance services. The company's in-house maintenance team handles routine tasks, while specialized services like HVAC and electrical work are outsourced. This hybrid approach allows for cost savings and expertise sharing.

## Impact of Seasonal Variations on Maintenance Costs

Seasonal variations can affect maintenance costs at Lee's Market. For example, summer months require more frequent cleaning and pest control services due to increased foot traffic. Conversely, winter months require more frequent snow removal and salting services. The company's maintenance team adjusts its schedules accordingly.

## Average Cost of a Single Facility Maintenance Issue in Q2 2024

As a reminder, Lee's Market's maintenance budget is allocated regionally, with 35% dedicated to the East Coast and 25% to the West Coast. The remaining 40% is allocated to the Midwest and South. This allocation is based on the company's sales data and market analysis.

## Conclusion

This report underscores the importance of proactive maintenance planning and resource allocation to minimize costs and ensure optimal store performance. Recommendations include regular budget reviews and strategic partnerships with maintenance service providers to optimize resources and reduce costs.
