# Supplementary material
Source: ML conference proceedings conference paper supplement (https://openreview.net/forum?id=IGYQ4c92e2)
Supplement: supplementary_material [file Facility-Cost-Report.pdf › drbench/data/tasks/DR0009/files/qa_1755705568/Facility-Cost-Report.pdf]

# Facility Operations Cost Analysis Report Q2 2024

## Introduction

As the Facilities Manager at MediConn Solutions, it is essential to regularly review and analyze our facility operations costs to ensure we are running efficiently and effectively. This report aims to provide an overview of our facility operations costs for Q2 2024, identifying areas for improvement and opportunities for cost savings. The report will examine various aspects of our facility operations, including utility costs, maintenance expenses, and space utilization. By understanding these costs, we can make informed decisions to optimize our facility operations and support the company's overall goals.

## Optimizing Space Utilization for Cost-Effective Operations

To enhance our virtual healthcare services, the facilities team has been working closely with the IT department to implement a new hot-desking system, which is expected to increase our desk utilization rate by 15% by the end of Q3 2024. This initiative will allow us to repurpose underutilized office space and accommodate more employees in our existing facilities. As of June 2024, we have successfully transitioned 30 employees to the new hot-desking arrangement, with plans to expand to an additional 50 employees by the end of the year. This effort will not only improve collaboration and productivity but also contribute to a more sustainable and cost-effective work environment.

## Utility Cost Trends and Energy Efficiency Initiatives

In line with our company's commitment to sustainability, we have been exploring opportunities to invest in on-site renewable energy generation. In May 2024, our sustainability team conducted a feasibility study on installing solar panels at our largest facility, which showed promising results. We are currently evaluating potential vendors and expect to make a decision by the end of Q3 2024. This initiative will not only reduce our reliance on non-renewable energy sources but also contribute to a reduced carbon footprint and enhanced brand reputation.

## Facility Maintenance Expenses and Vendor Performance Review

As part of our ongoing effort to optimize facility maintenance expenses, we conducted a thorough review of our vendor contracts in Q1 2024. This review led to the renegotiation of contracts with two of our major vendors, resulting in a 5% reduction in maintenance costs. We have also implemented a new vendor performance management system, which allows us to track vendor performance metrics and identify areas for improvement. This system has already shown promising results, with a 10% increase in vendor compliance rates since its implementation in April 2024.

## Conclusion

In conclusion, this report highlights the importance of regularly reviewing and analyzing our facility operations costs to ensure we are running efficiently and effectively. By implementing cost-saving initiatives and optimizing our space utilization, we can reduce our facility operations costs and support the company's overall goals. The recommendations outlined in this report should be implemented in the next quarter to achieve these cost savings. Further review and analysis will be conducted to identify additional areas for improvement and opportunities for cost savings.
