# Supplementary material
Source: ML conference proceedings conference paper supplement (https://openreview.net/forum?id=IGYQ4c92e2)
Supplement: supplementary_material [file facility-cost-report.pdf › drbench/data/tasks/DR0010/files/qa_1755712721/facility-cost-report.pdf]

# Q2 2024 Facility Operations Cost Analysis Report

## Introduction

As the Facilities Manager at MediConn Solutions, I am responsible for overseeing the maintenance and operations of our virtual healthcare facilities. This report aims to provide an overview of our facility operations costs for Q2 2024, highlighting areas of efficiency and opportunities for improvement. The purpose of this analysis is to inform strategic decision-making and optimize our facility operations to support the growth of our virtual healthcare services. This report is intended for internal stakeholders, including the executive team and department heads.

## Energy Consumption Trends and Benchmarking Analysis

Our analysis of industry trends indicates a 5% reduction in energy consumption across healthcare facilities in Canada over the past two years. This shift is largely attributed to the adoption of energy-efficient equipment and sustainable practices. As part of our ongoing efforts to stay ahead of the curve, our facilities team has been exploring opportunities to integrate renewable energy sources into our operations. A feasibility study is scheduled to commence in Q3 2024.

## Facility Maintenance and Capital Expenditure Planning

In 2023, we invested \$750,000 in upgrading our HVAC systems across three facilities, resulting in improved indoor air quality and enhanced patient comfort. Our maintenance team has also implemented a preventative maintenance program, which has reduced equipment downtime by 15% over the past six months. As we continue to grow, we are prioritizing the development of a comprehensive capital expenditure plan to ensure our facilities remain modern and efficient. This plan is expected to be finalized by the end of Q4 2024.

## Cost Optimization Strategies for Sustainable Operations

As part of our commitment to sustainability, we have established a green team to identify opportunities for reducing waste and conserving resources. One initiative currently underway is the implementation of a recycling program for medical supplies, which is expected to divert 20% of our waste from landfills. We are also exploring partnerships with environmentally responsible vendors to reduce our carbon footprint. Our goal is to achieve a 10% reduction in waste by the end of 2025.

## Conclusion

In conclusion, our Q2 2024 facility operations cost analysis highlights the need for continued monitoring and optimization of our energy consumption and maintenance costs. Recommendations for cost optimization strategies will be presented to the executive team for consideration. By implementing these strategies, we can reduce our operational costs and support the growth of our virtual healthcare services. Next steps will include developing a comprehensive plan for implementing these recommendations and tracking progress over the next quarter.
