# Supplementary material
Source: ML conference proceedings conference paper supplement (https://openreview.net/forum?id=IGYQ4c92e2)
Supplement: supplementary_material [file facility-cost-report.pdf › drbench/data/tasks/DR0010/files/qa_1755713021/facility-cost-report.pdf]

# Q2 2024 Facility Operations Cost Analysis Report

## Introduction

As part of our ongoing efforts to optimize facility operations and reduce costs, this report provides an overview of our Q2 2024 facility expenses. The purpose of this analysis is to identify areas for improvement and inform strategic decision-making. Our facility operations play a critical role in supporting our virtual healthcare services, and it is essential that we manage our resources efficiently. This report highlights key trends and insights from the past quarter.

## Facility Maintenance and Upkeep Expenditure Trends

Our facilities team has been actively working on reducing overall energy consumption since Q1 2023, with a focus on upgrading to LED lighting and optimizing HVAC usage. This effort has resulted in a 12% decrease in energy costs over the past 12 months. The team is now exploring opportunities to apply similar efficiency principles to our waste management processes. By streamlining these operations, we aim to reduce waste disposal costs by 8% by the end of 2024.

## Water Conservation Initiatives and Best Practices

In June 2023, our sustainability department launched an employee awareness campaign to promote water-saving habits in our daily operations. The campaign included workshops, posters, and a company-wide challenge to reduce personal water usage. As a result, we've seen a significant increase in employee engagement, with 75% of staff members participating in the challenge and committing to reduce their water consumption. We plan to expand this initiative to our patients and clients in the coming months.

## Resource Utilization and Cost Allocation Breakdown

Our finance team has been working on refining our cost allocation model to better reflect the actual usage of resources across departments. As part of this effort, we've implemented a new system to track and allocate IT costs, which account for approximately 22% of our overall operational expenses. This new system has allowed us to identify areas of inefficiency and optimize our IT resource allocation, resulting in a 5% reduction in IT costs over the past 6 months. We plan to apply this same approach to other departments in the coming quarters.

## Conclusion

In conclusion, our Q2 2024 facility operations cost analysis reveals opportunities for cost savings and resource optimization. By implementing water conservation initiatives and streamlining our maintenance processes, we can reduce our environmental footprint and lower our operational expenses. We recommend prioritizing these initiatives in the coming quarter to achieve our sustainability and cost-reduction goals. Further analysis and monitoring will be necessary to ensure the effectiveness of these efforts.
