# Supplementary material
Source: ML conference proceedings conference paper supplement (https://openreview.net/forum?id=IGYQ4c92e2)
Supplement: supplementary_material [file Facility-Maintenance-Review-2024.docx]

# Facility Maintenance Performance Review Q4 2024

## Introduction

This report provides an overview of our facility maintenance costs for the fourth quarter of 2024. As part of our ongoing efforts to optimize operations, we aim to identify opportunities for improvement and ensure compliance with regulatory requirements.

## Maintenance Spend Analysis

Our maintenance spend analysis has identified opportunities for cost reduction by leveraging data-driven insights to optimize our facilities' energy consumption. For instance, our pilot program in the food court has resulted in a 12% reduction in energy costs. We plan to expand this program to other departments, including the bakery and deli. By doing so, we aim to reduce our carbon footprint and achieve our sustainability goals.

## Facilities Management Strategies

To ensure seamless operations, our facilities management team has developed a comprehensive strategy that includes regular equipment maintenance, timely repairs, and proactive planning for future expansions. This approach has enabled us to maintain high levels of customer satisfaction and minimize disruptions. Our team is committed to providing a safe and efficient shopping environment for our customers.

## Cost Reduction Initiatives

As part of our ongoing efforts to improve operational efficiency, we have implemented various cost reduction initiatives across our stores. These include streamlining inventory management, optimizing labor scheduling, and renegotiating contracts with suppliers. By implementing these measures, we aim to reduce costs and enhance our competitiveness in the market.

## Quarterly Performance Metrics

Our quarterly performance metrics provide valuable insights into our business performance. We track key indicators such as sales growth, inventory turnover, and customer satisfaction. These metrics enable us to identify trends, make data-driven decisions, and optimize our operations for better results.

## Maintenance Budget Allocation

To ensure effective allocation of our maintenance budget, we have developed a comprehensive budgeting process that takes into account various factors, including equipment lifespan, usage patterns, and industry benchmarks. This approach enables us to make informed decisions about our maintenance spending and optimize our budget allocation.

## Trend Analysis and Insights

Our trend analysis and insights team has identified key trends in the retail industry, including the growing demand for online shopping, the increasing importance of sustainability, and the need for omnichannel experiences. By understanding these trends, we can better serve our customers, stay ahead of the competition, and drive business growth.

## Conclusion

This report highlights key findings and recommendations for optimizing facility maintenance costs. We encourage stakeholders to review the report and provide feedback to improve our operations. Future reports will continue to track and analyze maintenance spend to ensure optimal performance.
