# Supplementary material
Source: ML conference proceedings conference paper supplement (https://openreview.net/forum?id=IGYQ4c92e2)
Supplement: supplementary_material [file Facility-Operations-Report-2024-Q3.docx]

# Facility Operations Quarterly Report

## Introduction

This report provides insights into our facility rental costs for Q3 2024, examining the financial implications on our virtual healthcare services.

## Rental Market Trends in Q3 2024

The virtual healthcare industry has seen a significant shift towards digital solutions, with a 25% increase in demand for remote healthcare services over the past two years. This trend is expected to continue, with more patients opting for online consultations and telemedicine services. As a result, healthcare providers are adapting to this new reality by investing in digital infrastructure and staff training.

## Facility Utilization Rates

Our facility management team has been working closely with the maintenance department to optimize energy consumption and reduce waste. This has resulted in a 10% decrease in energy costs and a 5% reduction in waste disposal. These efforts have also improved the overall cleanliness and organization of the facility.

## Cost Allocation Strategies

Our finance team has been exploring alternative cost allocation strategies to better manage our expenses. This includes implementing a new accounting software and streamlining our budgeting process. We are also reviewing our pricing structure to ensure it is competitive and aligned with industry standards.

## Lease Agreement Analysis

We have been analyzing our lease agreements to identify areas for improvement. This includes reviewing our contract terms, insurance coverage, and maintenance responsibilities. Our goal is to ensure that our lease agreements are fair, reasonable, and aligned with our business objectives.

## Rental Cost Breakdown by Floor

Our facility management team has been working on a project to upgrade our elevators and escalators. This will improve the overall accessibility and functionality of our facility. The project is expected to be completed within the next 12 months.

## Comparative Analysis with Q2 2024

Our marketing team has been conducting a comparative analysis of our website traffic and social media engagement metrics to identify areas for improvement. This includes reviewing our website design, content strategy, and social media advertising campaigns.

## Insights into Facility Rental Costs per Square Foot

Our facilities team has been working on a project to reduce our carbon footprint by implementing sustainable practices and reducing energy consumption. This includes installing solar panels, improving energy-efficient lighting, and reducing water waste.

## Conclusion

Our findings highlight the importance of monitoring facility rental costs and support further optimization of our virtual healthcare services.
