# Supplementary material
Source: ML conference proceedings conference paper supplement (https://openreview.net/forum?id=IGYQ4c92e2)
Supplement: supplementary_material [file Facility-Operations-Report.pdf › drbench/data/tasks/DR0009/files/qa_1755705257/Facility-Operations-Report.pdf]

# Q3 2024 Facility Operations Report

## Introduction

This report provides an overview of our facility operations in Q3 2024, highlighting key trends, challenges, and areas for improvement. As the Operations Manager, my goal is to ensure our facilities are running efficiently and effectively, supporting our virtual healthcare services. This report aims to inform stakeholders of our progress and provide recommendations for future development. By analyzing our facility operations, we can optimize our resources and improve patient care.

## Facility Utilization and Resource Allocation

Our patient engagement platform has seen a 25% increase in usage since Q2 2023, with an average of 500 patients accessing our virtual services daily. This growth has led to the development of a resource allocation task force, which aims to optimize our digital infrastructure and reduce latency by 15% by the end of 2024. The task force, established in collaboration with our IT department, will also focus on improving data analytics to better inform our resource allocation decisions. By streamlining our digital operations, we can enhance the overall patient experience and improve our bottom line.

## Renovation and Maintenance Expenditure Analysis

As part of our ongoing commitment to sustainability, we conducted an energy audit of our facilities in Q1 2024, which revealed opportunities for improvement in lighting and HVAC systems. We are currently exploring options for energy-efficient upgrades, with the goal of reducing our carbon footprint by 10% within the next 18 months. Our facilities team is working closely with external consultants to identify and prioritize projects that will have the greatest environmental impact. By investing in sustainable practices, we can reduce our operational costs and contribute to a healthier environment.

## Strategic Planning for Future Facility Needs

In response to growing demand for our virtual healthcare services, we are developing a comprehensive workforce development plan to ensure our staff is equipped to meet the evolving needs of our patients. This plan includes training programs focused on emerging trends in telemedicine, as well as recruitment initiatives aimed at attracting top talent in the industry. By investing in our workforce, we can enhance our competitive advantage and drive business growth. Our goal is to increase our staff by 20% within the next 12 months to support our expanding operations.

## Conclusion

In conclusion, our Q3 2024 facility operations have shown areas of improvement, particularly in resource allocation and renovation expenditures. To address these challenges, I recommend implementing a more efficient resource allocation system and conducting regular reviews of our renovation and maintenance expenditures. By doing so, we can optimize our facility operations and better support our virtual healthcare services. I propose a follow-up review in Q1 2025 to assess our progress and identify further areas for improvement.
