# Supplementary material
Source: ML conference proceedings conference paper supplement (https://openreview.net/forum?id=IGYQ4c92e2)
Supplement: supplementary_material [file food-safety-compliance.pdf › drbench/data/tasks/DR0001/files/IN002_pdf/food-safety-compliance.pdf]

# Enhancing Food Safety through Regulatory Compliance

## Introduction

As a leading Asian supermarket chain, Lee's Market prioritizes providing high-quality products to our customers while ensuring their safety. The FDA's Food Safety Modernization Act (FSMA) 204 regulations have introduced new requirements for food traceability. This document outlines our strategy for leveraging these regulations to enhance food safety and customer trust. By proactively addressing these changes, we can maintain our commitment to excellence and customer satisfaction.

## Supply Chain Visibility and Product Tracing

In Q2 2022, our logistics department implemented a new transportation management system, resulting in a 12% reduction in transit times and a 9% decrease in fuel costs. This improvement has enabled us to better manage our inventory levels and respond to changing customer demands. Our distribution centers now operate with increased efficiency, allowing us to process an average of 250 shipments per day. This streamlined process has also led to a 20% reduction in customer complaints related to delivery times.

## Food Safety Modernization Act (FSMA) Overview

As of Q3 2024, our inventory management system tracks approximately 250 high-risk food products, accounting for nearly 30% of our total inventory. This subset of products requires enhanced traceability and monitoring under FSMA 204 regulations. To ensure compliance, we are implementing additional controls and data capture mechanisms to facilitate swift recalls and improve overall food safety. By focusing on these high-risk products, we can optimize our inventory management processes, reduce waste, and maintain the trust of our customers. Effective tracking and monitoring of these products will be critical to our compliance strategy moving forward.

## Risk Assessment and Mitigation Strategies

As part of our ongoing commitment to risk management, we conducted a comprehensive business continuity planning exercise in 2022. The simulation involved 150 employees from various departments and tested our response to potential disruptions, such as natural disasters and supply chain disruptions. The results highlighted areas for improvement, including the need for enhanced communication protocols and more robust backup systems. We have since invested \$250,000 in upgrading our disaster recovery infrastructure.

## Technology Integration for Compliance and Efficiency

Lee's Market has been investing in digital transformation initiatives, including the implementation of a new customer relationship management (CRM) system in 2023. The CRM system has enabled our customer service team to respond to customer inquiries more efficiently, resulting in a 25% reduction in response times. We have also seen a 15% increase in customer engagement through targeted marketing campaigns. Our IT department is currently exploring opportunities to integrate the CRM system with our existing loyalty program.

## Change Management and Employee Training Programs

In 2022, we launched a company-wide training program focused on diversity, equity, and inclusion (DEI). The program included workshops, online modules, and coaching sessions, and was attended by over 90% of our employees. The training aimed to foster a more inclusive work environment and

promote cultural awareness. We have since seen a 20% increase in employee satisfaction ratings and a 15% reduction in turnover rates. Our HR department is currently evaluating the program's impact on business outcomes.

## Conclusion

In conclusion, Lee's Market is well-positioned to enhance food safety and customer trust by leveraging FSMA 204 regulations. By implementing the strategies outlined in this document, we can ensure compliance, reduce risk, and maintain our reputation for excellence. Next steps include conducting a thorough risk assessment and developing a comprehensive training program for employees. By prioritizing food safety and regulatory compliance, we can continue to grow and succeed in the competitive retail market.
