# Supplementary material
Source: ML conference proceedings conference paper supplement (https://openreview.net/forum?id=IGYQ4c92e2)
Supplement: supplementary_material [file food-safety-regulatory-compliance.pdf › drbench/data/tasks/DR0001/files/IN001_pdf/food-safety-regulatory-compliance.pdf]

# Enhancing Food Safety Through Regulatory Compliance

## Introduction

As Lee's Market continues to expand its operations across the U.S. and Canada, ensuring compliance with evolving regulatory requirements is crucial for maintaining customer trust and upholding our brand reputation. The FDA's Food Safety Modernization Act (FSMA) presents a critical framework for guiding our food safety initiatives. This document aims to explore key considerations for leveraging regulatory requirements to drive business excellence. By proactively addressing regulatory changes, we can mitigate risks, improve operational efficiency, and reinforce our commitment to providing high-quality products.

## Risk-Based Preventive Controls for Supply Chain Management

According to our quarterly supplier performance review, 85% of our vendors have implemented robust corrective action procedures, resulting in a significant reduction in quality-related issues. However, we still face challenges with 12% of our suppliers, who require additional support to meet our quality standards. Our procurement team is working closely with these vendors to develop improvement plans and provide necessary training. By the end of Q3 2024, we aim to have all suppliers aligned with our quality expectations.

## Leveraging Technology for Enhanced Traceability and Transparency

Our IT department has been working on integrating our enterprise resource planning (ERP) system with a new data analytics platform to enhance business intelligence and inform strategic decision-making. The project, which is expected to be completed by mid-2025, will provide real-time insights into sales trends, inventory levels, and customer behavior. This will enable our category managers to optimize product assortment, improve demand forecasting, and reduce stockouts. We anticipate a 5% increase in sales revenue as a result of this initiative.

## Food Safety Culture: A Foundation for Compliance

Our organization's commitment to reducing food waste has yielded promising results, with a notable 8% decrease in Q2 2024. This achievement not only saved the company \$1.2 million but also underscores the potential for FSMA 204 implementation to drive further improvements in food safety and operational efficiency. By fostering a culture that prioritizes waste reduction and supply chain transparency, we can enhance customer trust and better position ourselves for compliance with evolving regulatory requirements. As we move forward with implementing FSMA 204, our focus on food safety culture will remain essential in driving business outcomes that align with our values and strategic objectives.

## Proactive Recall Strategies for Minimizing Business Disruption

In 2023, we conducted a comprehensive review of our crisis management procedures, which included a simulated product recall exercise. The drill revealed areas for improvement in our communication protocols and supply chain responsiveness. As a result, we have updated our crisis management plan to include more robust notification procedures and regular training exercises for our crisis management team. We are confident that these enhancements will enable us to respond more effectively in the event of a real product recall.

# Integrating Regulatory Requirements into Operational Workflows

As part of our ongoing efforts to streamline regulatory compliance, we have established a cross-functional compliance committee to oversee the implementation of regulatory requirements across the organization. The committee, which meets quarterly, has been instrumental in identifying areas for improvement and developing strategies to address regulatory gaps. In 2024, we plan to conduct a comprehensive review of our compliance program to ensure alignment with changing regulatory requirements and industry best practices.

## Conclusion

In conclusion, by embracing a proactive approach to regulatory compliance, Lee's Market can not only ensure adherence to FSMA requirements but also drive business growth, enhance customer trust, and reinforce our position as a leader in the Asian grocery market. The recommendations outlined in this document provide a roadmap for integrating regulatory requirements into our operational workflows, ultimately contributing to a safer, more efficient, and more transparent food supply chain. Next steps will involve collaborating with cross-functional teams to implement these initiatives and monitoring their effectiveness. By working together, we can ensure that Lee's Market remains at the forefront of food safety excellence.
