# Supplementary material
Source: ML conference proceedings conference paper supplement (https://openreview.net/forum?id=IGYQ4c92e2)
Supplement: supplementary_material [file HQ-Facility-Cost-Analysis-2024.docx]

# Quarterly HQ Facility Cost Analysis Report

## Introduction

This report provides a comprehensive overview of the HQ facility's operational expenses and capital expenditures for Q2 2024, aiming to inform strategic decisions and optimize resource allocation.

## Facility Operations Overview

Our facility operations team has been successfully implementing a new inventory management system, which has streamlined our receiving and storage processes. In Q1 2024, we saw a 12% reduction in receiving errors and a 7% increase in inventory turns. This system has allowed us to better track and analyze our inventory levels, enabling more informed decisions about our product offerings and promotions. The team is currently exploring ways to integrate this system with our sales data to further optimize our product mix.

## Capital Expenditure Trends

Our capital expenditure trends over the past three years have shown a steady increase in spending on technology and equipment upgrades. In 2022, we invested $800,000 in new point-of-sale systems, while 2023 saw a $500,000 spend on upgraded store fixtures. We anticipate continued investment in these areas to stay competitive and drive sales growth. The current budget for 2024 is $1.2 million, with a focus on energy-efficient solutions and sustainability initiatives.

## Energy Consumption Analysis

Our energy consumption analysis has identified opportunities for cost savings through more efficient lighting and HVAC systems. A recent audit revealed that our headquarters building could reduce energy consumption by 15% through the implementation of new LED lighting and a more efficient cooling system. We are currently exploring options for retrofitting the building and have budgeted $300,000 for the project. The expected payback period for this investment is approximately 5 years.

## Total Facilities Cost Breakdown

Our total facilities cost breakdown for 2023 was as follows: 45% for labor, 30% for materials and supplies, 15% for utilities, and 10% for maintenance and repairs. This breakdown has been consistent over the past few years, with minimal fluctuations. We are currently reviewing our budget for 2024, with a focus on ensuring that our expenses align with our strategic priorities.

## Recommendations for Cost Optimization

Our procurement team has been working to optimize our supply chain and reduce costs. Through a recent review of our vendor contracts, we were able to negotiate a 10% reduction in costs for our top 20 vendors. We are also exploring alternative transportation options for our inventory, which could lead to further cost savings. The team is currently evaluating the viability of these initiatives and will present findings and recommendations to senior management by the end of Q1 2024.

## Conclusion

In conclusion, this report highlights the importance of monitoring and optimizing facility costs to ensure the HQ's operational efficiency. Recommendations for cost reduction and resource allocation will be implemented to achieve the company's strategic objectives.
