# Supplementary material
Source: ML conference proceedings conference paper supplement (https://openreview.net/forum?id=IGYQ4c92e2)
Supplement: supplementary_material [file HR-Operations-Performance-Metrics-Report.docx]

# HR Operations Performance Metrics Report

## Introduction

This report provides an overview of HR-related issue resolution trends in Q1 2025, highlighting key performance metrics for Lee's Market's HR team.

## HR Issue Classification and Categorization

Lee's Market has implemented a comprehensive classification system for HR-related issues, categorizing them into distinct groups such as employee relations, benefits administration, and compliance. This system enables our HR team to prioritize and address issues more efficiently. As of Q4 2024, we have refined our classification system to better align with industry standards, resulting in improved issue resolution times. Our next step is to integrate this system with our customer relationship management software to enhance data analysis.

## Resolution Timeframe Analysis by Department

Our store operations team has been working closely with the HR department to develop a comprehensive store-level issue resolution process. This collaboration has led to significant improvements in department-level issue resolution times. For instance, the produce department has seen a 20% reduction in issue resolution time since implementing our new inventory management system. We are confident that this trend will continue as we roll out similar initiatives across other departments.

## Employee Feedback and Satisfaction Insights

Our employee engagement strategy has been instrumental in improving overall employee satisfaction. Regular surveys and focus groups have provided valuable insights into employee concerns, allowing us to address these issues promptly. Our latest survey revealed that 85% of employees are satisfied with their role, and 75% feel empowered to make decisions. These metrics will continue to inform our employee engagement strategy moving forward.

## HR Team Performance Metrics and Benchmarks

The HR team's performance is closely monitored through key performance indicators such as employee turnover rates, training completion rates, and recruitment metrics. These metrics have been instrumental in identifying areas for improvement and tracking progress. Our HR team has consistently exceeded industry benchmarks in these areas, with an employee retention rate of 85% and an average time-to-hire of 30 days. We will continue to refine our metrics to better align with industry standards.

## Conclusion and Recommendations for Improvement

In conclusion, Lee's Market's HR department has made significant strides in improving issue resolution times through our classification system, process improvements, and employee engagement initiatives. To further enhance our HR services, we recommend exploring new technology solutions for HR workflow automation and implementing a comprehensive compliance training program. These initiatives will enable us to continue providing exceptional HR services to our employees and customers.

## Conclusion

The report reveals opportunities for process improvements and suggests targeted training for the HR team to enhance issue resolution efficiency. Next steps include implementing a centralized issue tracking system and conducting regular feedback sessions.
