# Supplementary material
Source: ML conference proceedings conference paper supplement (https://openreview.net/forum?id=IGYQ4c92e2)
Supplement: supplementary_material [file HR-Q1-Employee-Headcount-Report.docx]

# Human Resources Quarterly Report Summary

## Introduction

This report provides an overview of our employee headcount for the first quarter of 2025, showcasing our company's growth and development.

## Workforce Planning and Analysis

Our workforce planning and analysis team has been busy refining our succession planning process, ensuring a smooth transition for key positions. This quarter, we've seen a 12% increase in employee engagement metrics, thanks to our new internal communication platform. As we continue to grow, it's essential to stay agile and adapt to changing market conditions. By fostering a culture of innovation, we can drive business results and improve overall employee satisfaction.

## Talent Acquisition Strategies

To stay competitive in the market, we've been exploring new talent acquisition strategies, such as partnering with local universities to attract top talent. Our diversity and inclusion initiatives have also seen significant progress, with a 25% increase in female hires in the past year. As we continue to expand, it's critical to find the right balance between internal development and external recruitment. By doing so, we can build a strong, diverse workforce that drives business success.

## Employee Retention and Development

Our employee retention and development programs have been gaining traction, with a 30% reduction in turnover rates in the past quarter. By providing targeted training and development opportunities, we're empowering our employees to take on new challenges and drive business growth. As we look to the future, it's essential to continue investing in our people, ensuring they have the skills and resources needed to succeed. Our employee satisfaction surveys have seen a significant increase in positive feedback, indicating a strong sense of engagement and commitment.

## Organizational Design and Structure

As we continue to grow, we're reassessing our organizational design and structure to ensure optimal performance. Our leadership team has been working closely with department heads to define clear roles and responsibilities, streamlining processes and improving communication. By doing so, we can eliminate inefficiencies, reduce costs, and increase productivity. Our organizational design framework is built on a foundation of clear goals, defined roles, and effective communication.

## Q1 2025 Employee Headcount Summary

Unfortunately, due to a technical issue, our usual quarterly headcount report is unavailable. However, we are working diligently to resolve the issue and provide accurate information as soon as possible. In the meantime, please refer to our previous quarterly reports for historical headcount data. We appreciate your understanding and apologize for any inconvenience this may cause.

## Conclusion

This report highlights the importance of monitoring our employee headcount and provides recommendations for future planning and development.
