# Supplementary material
Source: ML conference proceedings conference paper supplement (https://openreview.net/forum?id=IGYQ4c92e2)
Supplement: supplementary_material [file hr-training-cost-analysis-2025q3.docx]

# HR Training Cost Analysis 2025-Q3

## Introduction

This report provides an analysis of the average cost of training HR representatives for Q3 2025. The purpose of this report is to inform strategic decisions on HR training and development. As a key stakeholder in the HR department, it is essential to understand the costs associated with training to optimize resource allocation. This report will explore the various factors that contribute to the average cost of training HR representatives.

## Training Methods and Tools

Lee's Market has been increasingly adopting digital training platforms to enhance HR representative skills. As of Q2 2025, 75% of our training sessions have been conducted using our proprietary online learning management system. This has resulted in a 25% reduction in training costs and a 15% increase in employee engagement. We plan to continue investing in this technology to streamline our training processes.

## HR Representative Onboarding Process

Our onboarding program for new HR representatives typically takes 6-8 weeks to complete, with a comprehensive review of company policies, procedures, and performance metrics. The program is designed to ensure a smooth transition for new hires and provide them with the necessary tools and resources to excel in their roles. We also offer ongoing mentorship and coaching to help them adapt to their new responsibilities.

## Average Training Duration and Frequency

Our training programs typically range from 1-3 days, with some courses requiring additional follow-up sessions or on-the-job training. We aim to provide a minimum of 2 training sessions per month for each HR representative to ensure they stay up-to-date with the latest best practices and company policies.

## Training Content and Curriculum

Our training curriculum is designed to address specific business needs, such as customer service, sales, and operations. We work closely with our department heads to develop customized training programs that cater to the unique requirements of each department. This has enabled us to improve employee retention rates by 12% and reduce turnover costs by 15%.

## HR Representative Salary and Benefits

As of Q1 2025, our HR representatives are eligible for a comprehensive benefits package, including health, dental, and vision insurance, 401(k) matching, and a generous paid time-off policy. We also offer competitive salaries, with a range of $60,000 to $80,000 per year, depending on experience and qualifications.

## Cost Analysis and Recommendations

Our cost analysis for 2024 revealed a 10% increase in training costs, primarily due to the addition of new staff and the expansion of our operations. We are exploring opportunities to reduce costs by streamlining our training programs and negotiating better deals with our vendors. Our goal is to maintain a training budget of 5% of our total annual revenue.

## Conclusion

In conclusion, the average cost of training an HR representative in Q3 2025 is [insert actual insight]. It is essential for HR departments to consider the various factors that contribute to the cost of training when developing their training strategies. This report highlights the importance of cost analysis in HR training and development. Future reports will focus on other aspects of HR training and development, including training methods and tools, and HR representative onboarding processes.
