# Supplementary material
Source: ML conference proceedings conference paper supplement (https://openreview.net/forum?id=IGYQ4c92e2)
Supplement: supplementary_material [file infrastructure-report-q2.pdf › drbench/data/tasks/DR0010/files/qa_1755712211/infrastructure-report-q2.pdf]

# Q2 2024 Virtual Healthcare Infrastructure Report

## Introduction

As the Technical Operations Manager at MediConn Solutions, I am responsible for ensuring the stability and security of our virtual healthcare platforms. This report provides an overview of our infrastructure performance during Q2 2024, highlighting key metrics and areas for improvement. The purpose of this document is to inform stakeholders of our current infrastructure status and propose recommendations for future optimization. The insights presented in this report are based on data collected from our internal monitoring systems.

## Server Resource Utilization and Capacity Planning

In Q1 2024, our IT department successfully implemented a new resource allocation framework, resulting in a 15% reduction in server idle time. This improvement allowed us to reallocate resources to support the growth of our virtual healthcare services, which saw a 20% increase in patient engagement over the same period. Furthermore, our capacity planning efforts focused on ensuring seamless integration with our cloud services provider, enabling us to scale our infrastructure efficiently. By the end of Q1, we had achieved a 92% utilization rate of our server resources.

## Network Security Measures and Compliance Updates

As part of our ongoing commitment to security and compliance, we conducted a thorough review of our network architecture in March 2024. This review led to the implementation of enhanced encryption protocols and the deployment of advanced threat detection software. Our compliance team also ensured that all updates aligned with the latest regulatory requirements, including those related to patient data protection. By April 2024, we had completed the rollout of these updates across our entire network.

## System Downtime Analysis and Root Cause Identification

Our IT department has been working closely with our cloud services provider to develop a comprehensive framework for analyzing system downtime. This framework, which is expected to be fully implemented by Q3 2024, will enable us to identify root causes more efficiently and reduce the time spent on troubleshooting. In preparation for this rollout, we have been conducting training sessions for our IT staff on the new framework and tools. By June 2024, over 80% of our IT team had completed the training program.

## Cloud Services Cost Optimization Strategies

In an effort to optimize our cloud services costs, we conducted a thorough review of our usage patterns and identified areas for improvement. By adjusting our resource allocation and implementing more efficient scaling strategies, we were able to reduce our cloud costs by 12% in Q1 2024. We also renegotiated our contract with our cloud services provider, securing more favorable terms and discounts. These efforts are expected to result in annual cost savings of \$250,000.

## Infrastructure Upgrade Roadmap and Implementation Timeline

Our infrastructure upgrade roadmap for 2024 prioritizes the replacement of aging hardware and the adoption of more efficient technologies. We have allocated a budget of \$1.2 million for these upgrades, which are expected to be completed by the end of Q4 2024. Our IT department is working closely with external partners to ensure a smooth implementation process and minimize disruptions to our services.

By July 2024, we had completed the planning phase and begun procuring the necessary hardware and software.

## Conclusion

In conclusion, our Q2 2024 infrastructure performance has shown areas of strength and weakness. To improve our server uptime and reduce downtime percentages, I recommend implementing additional redundancy measures and upgrading our server hardware. Furthermore, I propose conducting regular security audits to ensure compliance with industry regulations. By implementing these recommendations, we can enhance the reliability and security of our virtual healthcare platforms.
