# Supplementary material
Source: ML conference proceedings conference paper supplement (https://openreview.net/forum?id=IGYQ4c92e2)
Supplement: supplementary_material [file innovative_strategies_for_sustainable_pasta_production.pdf › services/drbench_tools/src/data/users/susan.smith/nextcloud/Reports/Policy Updates/innovative_strategies_for_sustainable_pasta_production.pdf]

# Innovative Strategies for Sustainable Pasta Production

Jordan Thomas

April 10, 2025

## 1 Introduction

In the competitive landscape of the food industry, sustainability has become a crucial factor influencing consumer choices. As a leading provider of pasta products, Great Pasta is committed to integrating sustainability into its operational framework. This report outlines innovative strategies for sustainable pasta production, addressing environmental, economic, and social dimensions.

## 2 Background

Founded in 1895 in Rome, Italy, Great Pasta has a long-standing tradition of producing high-quality pasta. With over 25,000 employees, the company is a major player in the food sector. Our mission is to provide the best pasta in the world while ensuring accessibility for all. However, the growing environmental concerns necessitate a shift towards more sustainable practices.

## 3 Current Challenges

Despite our success, several challenges hinder our sustainability efforts:

- **\*\*Water Usage\*\***: The pasta production process is water-intensive, raising concerns about resource depletion.
- **\*\*Energy Consumption\*\***: High energy demands during production contribute to carbon emissions.

- **\*\*Waste Generation\*\***: Packaging waste and by-products from production processes need effective management.

## 4 Sustainable Strategies

To address these challenges, Great Pasta has identified the following innovative strategies:

### 4.1 1. Water Recycling Systems

Implementing advanced water recycling systems can significantly reduce water intake. For instance, a closed-loop system allows us to reuse water in various stages of production, decreasing overall consumption by up to 30%.

### 4.2 2. Renewable Energy Sources

Transitioning to renewable energy sources, such as solar and wind, can mitigate our carbon footprint. By investing in these technologies, we aim to reduce energy costs and emissions by 40% over the next decade.

### 4.3 3. Eco-Friendly Packaging

Switching to biodegradable packaging materials not only enhances brand image but also reduces waste. Our goal is to ensure that 80% of our packaging is eco-friendly by 2025.

## 5 Visualizing the Impact

To illustrate the potential impact of these strategies, we present the following graphs. The first graph shows the projected reduction in water usage over the next five years:

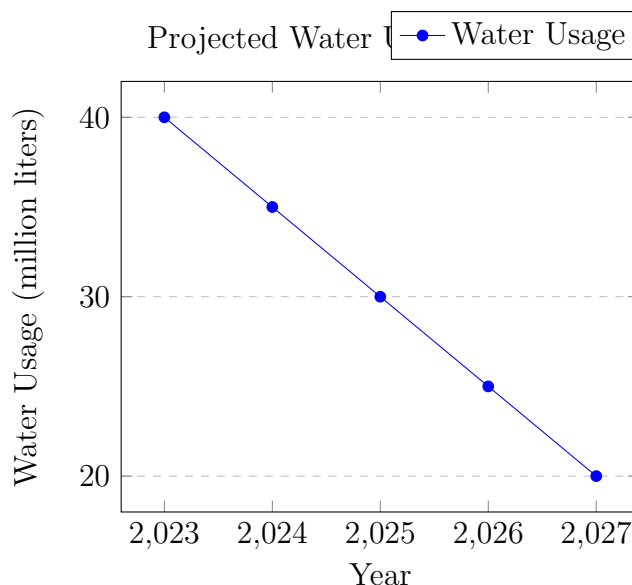

Figure 1: Projected reduction in water usage due to recycling systems.

## 6 Case Study: Eco-Friendly Packaging

In 2022, Great Pasta initiated a pilot program to test biodegradable packaging. The pilot was implemented in select markets, targeting environmentally conscious consumers. **Results** showed a 15% increase in sales in regions with eco-friendly packaging compared to traditional options.

## 7 Market Analysis

The demand for sustainable food products is on the rise. According to a report by the Food and Agriculture Organization (FAO), the global market for sustainable food is projected to reach \$1 trillion by 2025. This trend presents a significant opportunity for Great Pasta to enhance its market position.

### 7.1 Consumer Preferences

Research indicates that 70% of consumers are willing to pay more for sustainable products. This shift in consumer behavior underscores the importance of adopting sustainable practices not only for environmental reasons but also for maintaining competitiveness in the market.

## 8 Future Directions

Looking ahead, Great Pasta aims to:

- Launch a full-scale implementation of water recycling systems across all production facilities by 2025.
- Achieve a 40% reduction in carbon emissions through renewable energy initiatives by 2030.
- Expand the portfolio of eco-friendly products, including pasta made from alternative grains and sustainable sources.

## 9 Conclusion

Integrating sustainable practices into pasta production is not just a trend; it's a necessity for the future of Great Pasta. By embracing innovative strategies, we can address environmental challenges, meet consumer expectations, and secure our legacy as a leader in the food industry.

## 10 References

| Reference | Details                                                       |
|-----------|---------------------------------------------------------------|
| FAO       | Food and Agriculture Organization. "Sustainable Food Market." |

## 11 Images

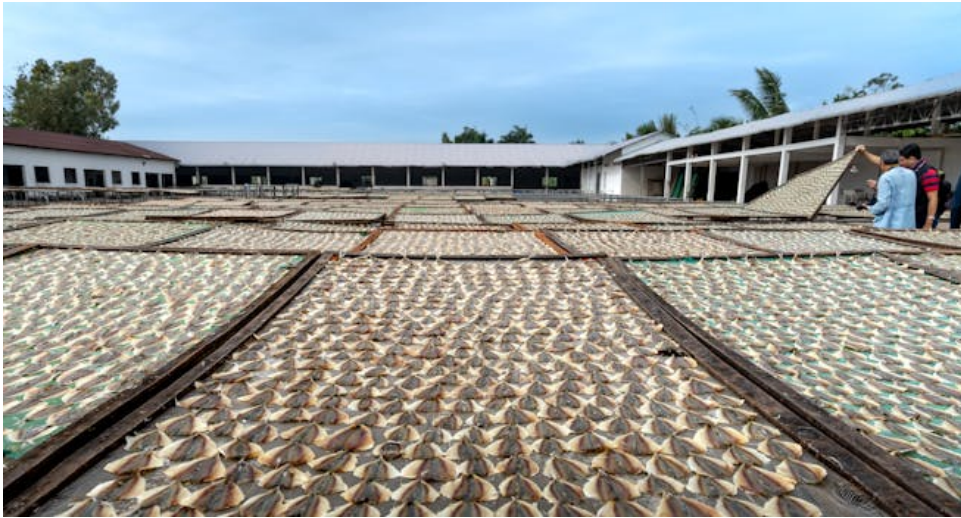

Figure 2: A sustainable pasta production facility showcasing eco-friendly practices.

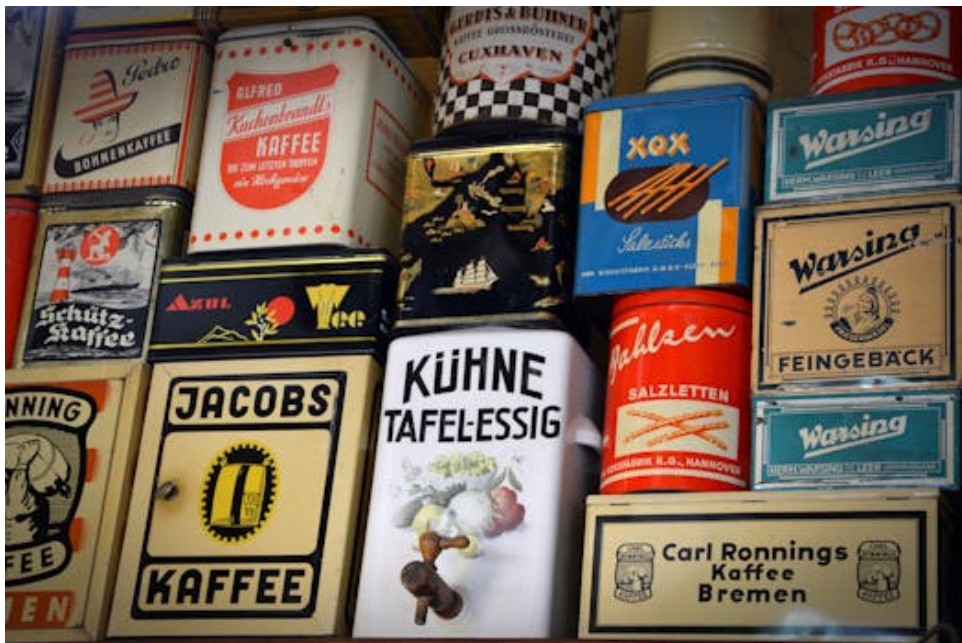

Figure 3: Biodegradable packaging options for pasta products.
