# Supplementary material
Source: ML conference proceedings conference paper supplement (https://openreview.net/forum?id=IGYQ4c92e2)
Supplement: supplementary_material [file it-budget-report.pdf › drbench/data/tasks/DR0010/files/qa_1755713057/it-budget-report.pdf]

# Q1 2025 IT Infrastructure Budget Report

## Introduction

This report provides an overview of our Q1 2025 IT infrastructure budget allocation, highlighting key areas of investment and expenditure. As a senior IT manager, I am responsible for ensuring our virtual healthcare platforms are secure, compliant, and running efficiently. This report aims to provide stakeholders with a comprehensive understanding of our IT budget allocation and identify areas for optimization. The findings and recommendations outlined in this report will inform our IT strategy for the remainder of 2025.

## Virtual Healthcare Platform Maintenance Costs

In Q4 2024, our platform maintenance team resolved 95% of all technical issues within a 2-hour window, resulting in a 25% reduction in downtime compared to the same period in 2023. This improvement can be attributed to our investment in a new incident management tool, which streamlined our troubleshooting process. The new tool also enabled our IT department to identify and address potential issues proactively, reducing the overall number of support tickets by 15%. As a result, we were able to reallocate 5% of our maintenance budget to other areas of the business.

## Cloud Services Expenditure Analysis

Our cloud services expenditure analysis revealed that 60% of our total cloud spend in Q2 2024 was attributed to data storage and processing. This was largely driven by the increasing demand for our virtual healthcare services, which resulted in a 30% growth in patient data. To optimize our cloud spend, we implemented a new data compression algorithm, which reduced our storage costs by 10%. We also renegotiated our contract with our cloud provider, securing a 5% discount on our total cloud spend.

## Server Hardware Upgrade Budget Allocation

Historically, our server hardware upgrades have been driven by the need to support new software applications and services. In 2023, we upgraded our servers to support the launch of our new telemedicine platform, which required additional processing power and storage capacity. The upgrade enabled us to provide high-quality video conferencing services to our patients, resulting in a 25% increase in patient engagement. We also saw a 15% reduction in server downtime, which improved our overall system reliability.

## Cybersecurity Measures and Compliance

In Q1 2025, we conducted a comprehensive cybersecurity risk assessment, which identified potential vulnerabilities in our network infrastructure. To address these risks, we implemented additional security controls, including multi-factor authentication and intrusion detection systems. We also conducted employee training sessions to educate staff on cybersecurity best practices, resulting in a 20% reduction in phishing-related incidents. Our compliance team ensured that all security measures were aligned with relevant regulatory requirements, including HIPAA and PIPEDA.

## Network Infrastructure Enhancement Initiatives

Our network infrastructure enhancement initiatives in Q3 2024 focused on upgrading our network switches and routers to support the increasing demand for our virtual healthcare services. The upgrade resulted in a 30% improvement in network performance, reducing latency and improving overall system responsiveness. We also implemented a new network monitoring tool, which enabled our IT department to detect and resolve network issues proactively, reducing downtime by 10%. The upgrade

also enabled us to support the growing number of remote workers, improving collaboration and productivity.

## **IT Resource Allocation and Utilization**

In Q2 2024, we conducted an IT resource allocation and utilization analysis, which revealed that 40% of our IT resources were dedicated to supporting our virtual healthcare platform. The analysis also showed that 20% of our IT resources were underutilized, presenting an opportunity for optimization. To address this, we implemented a new resource allocation framework, which enabled us to reallocate underutilized resources to other areas of the business. This resulted in a 10% reduction in IT costs and improved overall resource utilization.

## **Conclusion**

In conclusion, our Q1 2025 IT infrastructure budget allocation has been focused on ensuring the security, compliance, and efficiency of our virtual healthcare platforms. The findings outlined in this report highlight areas for optimization and inform our IT strategy for the remainder of 2025. Recommendations for future IT budget allocation will prioritize server hardware upgrades, cybersecurity measures, and network infrastructure enhancements. By implementing these recommendations, we can ensure the continued delivery of high-quality virtual healthcare services to our patients.
