# Supplementary material
Source: ML conference proceedings conference paper supplement (https://openreview.net/forum?id=IGYQ4c92e2)
Supplement: supplementary_material [file it-infrastructure-cost-analysis.docx]

# IT Infrastructure Cost Analysis Report

## Introduction

As the demand for efficient IT services grows, it is crucial to monitor and analyze our IT infrastructure costs. This report aims to provide a comprehensive overview of our Q2 2024 IT infrastructure expenses, enabling data-driven decisions to optimize our resource allocation.

## IT Infrastructure Cost Drivers

Our IT infrastructure cost drivers have evolved over the years, with a significant shift from traditional capital expenditures to operational expenditures. For instance, our cloud-based software subscriptions have increased by 25% in the past year, while hardware purchases have decreased by 15%. This trend reflects our efforts to optimize IT costs and improve scalability. Meanwhile, our IT team continues to monitor and optimize our infrastructure to ensure maximum efficiency.

## Quarterly IT Budget Breakdown

Our quarterly IT budget is typically allocated across various departments, with a focus on strategic initiatives and business priorities. For Q2 2024, our IT team is planning to allocate 30% of the budget to infrastructure upgrades, 25% to software development, and 20% to IT support. This breakdown reflects our commitment to investing in key areas that drive business growth.

## IT Spend Allocation by Department

Our IT spend allocation by department has remained relatively consistent over the past year, with a few notable exceptions. For instance, our e-commerce platform has seen a significant increase in IT spend due to its rapid growth. Conversely, our store operations department has seen a decrease in IT spend as we've optimized their processes. These fluctuations reflect our efforts to prioritize IT investments aligned with business priorities.

## Cost Savings Opportunities

Our IT team has identified several cost savings opportunities through process optimization, vendor negotiations, and technology upgrades. For example, our recent switch to a cloud-based email solution has resulted in annual savings of $150,000. We're also exploring opportunities to renegotiate our software licensing agreements and optimize our IT infrastructure for greater efficiency.

## IT Infrastructure Roadmap

Our IT infrastructure roadmap outlines our plans for the next 18 months, including key initiatives such as cloud migration, network upgrades, and cybersecurity enhancements. This roadmap reflects our commitment to investing in strategic areas that drive business growth and improve operational efficiency. We're excited to see the impact these initiatives will have on our organization.

## Infrastructural Expenses by Region

Our infrastructural expenses by region have remained relatively consistent, with a few notable exceptions. For instance, our Canadian operations have seen a significant increase in IT spend due to their rapid growth. Conversely, our U.S. operations have seen a decrease in IT spend as we've optimized their processes. These fluctuations reflect our efforts to prioritize IT investments aligned with business priorities.

## Conclusion

In conclusion, a thorough examination of our IT infrastructure costs reveals opportunities for cost savings and resource optimization. As we move forward, it is essential to maintain a data-driven approach to IT spending, ensuring our investments align with business objectives.
