# Supplementary material
Source: ML conference proceedings conference paper supplement (https://openreview.net/forum?id=IGYQ4c92e2)
Supplement: supplementary_material [file IT-Infrastructure-Maintenance-Report-Q3-2024.docx]

# IT Infrastructure Maintenance Report for Q3 2024

## Introduction

This report provides an overview of IT infrastructure maintenance costs for the third quarter of 2024, focusing on the electric vehicle market. As Elexion Automotive continues to grow, it is essential to monitor and optimize these costs to ensure efficient operations. This report will explore the key findings and recommendations for future improvements. By understanding the current state of IT infrastructure maintenance, we can better allocate resources and prioritize investments.

## IT Infrastructure Landscape

Our IT infrastructure has undergone significant changes in the past 18 months, with the implementation of a new enterprise resource planning system and the migration of our data centers to a cloud-based infrastructure. This has enabled us to streamline our operations and improve collaboration between teams. We have also seen a significant reduction in IT-related downtime, with an average reduction of 3.2 hours per week.

## Cost Optimization Strategies

We have been exploring various cost optimization strategies to reduce our overall IT expenses, including the implementation of a software-as-a-service model for our non-essential applications. This has resulted in a 12% reduction in IT costs over the past 12 months. We are also considering outsourcing non-core IT functions to third-party providers.

## Vehicle-Specific Maintenance Requirements

Our vehicle design team has been working closely with our manufacturing partners to develop new standards for vehicle maintenance and repair. This includes the development of standardized repair procedures and the implementation of advanced diagnostic tools. This will enable us to improve the efficiency of our maintenance operations and reduce the time to repair.

## IT Infrastructure Roadmap

Our IT infrastructure roadmap is focused on improving our digital infrastructure and enhancing our customers' experience. This includes the implementation of new digital platforms, the development of mobile apps, and the integration of emerging technologies such as artificial intelligence and the Internet of Things. This will enable us to stay ahead of the competition and drive business growth.

## Average Cost Analysis

We have been conducting a thorough analysis of our IT costs to identify areas for improvement and optimize our spending. This has resulted in a 5.6% reduction in IT costs over the past 12 months. We will continue to monitor our IT costs and make adjustments as necessary to ensure we are getting the best value for our investment.

## Future Maintenance Considerations

As we look to the future, we need to consider the maintenance requirements of our new electric vehicle fleet. This includes the development of new maintenance procedures and the implementation of advanced diagnostic tools. We are also exploring the use of data analytics to improve our maintenance operations and reduce downtime.

## Conclusion and Recommendations

In conclusion, our IT infrastructure has undergone significant changes in the past 18 months. We have implemented new systems and processes to improve our operations and reduce our IT costs. We will continue to monitor our IT infrastructure and make adjustments as necessary to ensure we are getting the best value for our investment.

## Conclusion

In conclusion, the average IT infrastructure maintenance cost per vehicle for Q3 2024 is a key metric for Elexion Automotive's continued growth and success. This report has highlighted the importance of cost optimization strategies, vehicle-specific maintenance requirements, and future maintenance considerations. We recommend implementing the outlined cost reduction measures and reviewing the IT infrastructure roadmap to ensure alignment with the company's goals. By doing so, Elexion Automotive can further reduce costs and improve operational efficiency.
