# Supplementary material
Source: ML conference proceedings conference paper supplement (https://openreview.net/forum?id=IGYQ4c92e2)
Supplement: supplementary_material [file IT-Infrastructure-Review-2024.docx]

# IT Infrastructure Development Q4 2024 Review

## Introduction

As we continue to expand and modernize our operations, it's essential to monitor and report on our IT infrastructure upgrades. This report summarizes the key developments and milestones achieved in Q4 2024, providing valuable insights for future improvements.

## Overview of IT Roadmap

Our IT roadmap is designed to harmonize with our company's strategic objective of expanding into new markets. This involves streamlining our technology infrastructure to support seamless integration with our existing systems. With a focus on digital transformation, we are poised to leverage cutting-edge technologies to drive business growth. By 2025, we aim to have implemented at least 70% of our digital roadmap initiatives.

## Infrastructure Upgrade Scheduling

To ensure a smooth transition, our IT department has developed a rigorous scheduling process for all infrastructure upgrades. This includes thorough assessments of system compatibility, vendor selection, and phased implementation. By doing so, we can minimize disruptions to our daily operations and guarantee a high level of service quality. In Q3 2024, we successfully completed a major IT project, upgrading our inventory management system to improve accuracy and reduce costs.

## Quarterly Performance Metrics

Our quarterly performance metrics are designed to measure key business indicators such as sales growth, customer satisfaction, and inventory turnover. By regularly monitoring these metrics, we can identify trends and make data-driven decisions to optimize our operations. In Q2 2024, we achieved an impressive 12% increase in online sales, which we attribute to our targeted marketing campaigns and enhanced e-commerce platform.

## IT Governance and Strategy

The IT governance and strategy team works closely with senior management to develop and implement our company's technology vision. This includes identifying emerging trends, assessing their potential impact, and developing strategic plans to leverage these opportunities. As we continue to grow, we are committed to maintaining a high level of IT governance and ensuring that our technology infrastructure is aligned with our business goals.

## Infrastructure Upgrade Outcomes

As part of our ongoing efforts to enhance our IT infrastructure, we have implemented various initiatives to improve system security, reduce downtime, and increase user satisfaction. For instance, our recent upgrade to a cloud-based storage solution has resulted in a 35% reduction in storage costs and a 25% increase in data accessibility. We are committed to building on these successes and exploring new technologies to drive innovation and growth.

## Conclusion

This report highlights the progress made in IT infrastructure upgrades during Q4 2024. The findings and recommendations provide a solid foundation for future improvements, ensuring the continued success and growth of our operations.
