# Supplementary material
Source: ML conference proceedings conference paper supplement (https://openreview.net/forum?id=IGYQ4c92e2)
Supplement: supplementary_material [file IT-Infrastructure-Upgrade-Analysis.docx]

# IT Infrastructure Upgrade Cycle Analysis 2023

## Introduction

As we continue to expand our virtual healthcare services, it's essential to optimize our IT infrastructure to ensure seamless operations. This report provides an analysis of our 2023 IT infrastructure upgrade cycle, highlighting key trends and recommendations for future improvements.

## Upgrade Cycle Overview and Objectives

Our virtual healthcare services have enabled us to streamline our patient engagement process, resulting in a 20% reduction in response times. This has allowed us to allocate more resources to our IT infrastructure, ensuring seamless integration with our digital platforms. As we continue to grow, our focus on scalability and security remains paramount.

## Infrastructure Optimization Strategies

To ensure optimal network performance, we have implemented a hybrid cloud infrastructure, using a combination of on-premises and cloud-based solutions. This approach has allowed us to reduce our carbon footprint by 15% and increase data redundancy by 30%. Our IT team has also implemented a rigorous testing protocol to ensure seamless integration with our digital platforms.

## Key Performance Indicators (KPIs) Analysis

Our KPIs analysis has revealed a 25% increase in patient engagement through our digital platforms, resulting in a corresponding 15% decrease in response times. This has allowed us to reallocate resources to high-demand services, such as telemedicine consultations. Our IT team has also developed a sophisticated reporting system to track key performance metrics.

## IT Budget Allocation and Forecasting

Our IT budget allocation is carefully managed to ensure optimal resource utilization. For the upcoming fiscal year, we are forecasting a 12% increase in IT spending, primarily driven by the need for additional security measures to protect our digital platforms. Our IT team is working closely with our finance department to ensure seamless allocation of resources.

## Conclusion and Recommendations for Future Cycles

In conclusion, our virtual healthcare services have enabled us to deliver high-quality care to our patients while maintaining a secure and compliant IT infrastructure. As we move forward, we will continue to focus on scalability, security, and patient engagement. Future cycles will require careful planning and resource allocation to ensure seamless integration with our digital platforms.

## Conclusion

In conclusion, our 2023 IT infrastructure upgrade cycle has demonstrated significant improvements in system reliability and efficiency. To build upon these successes, we recommend allocating a larger IT budget and implementing more robust KPIs to measure future upgrade cycles. This will enable us to make data-driven decisions and optimize our IT infrastructure for continued growth and success.
