# Supplementary material
Source: ML conference proceedings conference paper supplement (https://openreview.net/forum?id=IGYQ4c92e2)
Supplement: supplementary_material [file IT-Infrastructure-Upgrade-Cycle-Analysis.docx]

# IT Infrastructure Upgrade Cycle Analysis Report

## Introduction

This report provides an overview of our IT infrastructure upgrade cycle, highlighting key trends and insights to inform future planning and optimization. As a critical component of our virtual healthcare services, it is essential to understand the impact of IT infrastructure upgrades on our operations and patient care. This report aims to provide a comprehensive analysis of our IT infrastructure upgrade cycle, focusing on key metrics and considerations.

## IT Infrastructure Upgrade Cycle Overview

Our IT infrastructure upgrade cycle is designed to ensure seamless continuity of our virtual healthcare services. This includes regular software updates, security patches, and hardware replacements to maintain optimal system performance.

## Historical Upgrade Cycle Trends

In 2022, we saw a 15% increase in IT requests from our healthcare professionals, which led to a corresponding 8% growth in IT infrastructure upgrades. This trend reflects the expanding demand for our services.

## Infrastructure Upgrade Cycle Length Analysis

To ensure compliance with regulatory requirements, our IT team conducts quarterly risk assessments, which often uncover potential vulnerabilities. This proactive approach enables us to prioritize upgrades and minimize downtime.

## Upgrade Cycle Impact on IT Costs

Our IT department has developed a cost-benefit analysis framework to assess the financial implications of infrastructure upgrades. This framework helps us make informed decisions about investments in our digital platforms.

## IT Infrastructure Upgrade Roadmap

Our IT roadmap is designed to ensure long-term flexibility and scalability. This includes regular reviews of our infrastructure to identify opportunities for process improvements and cost savings.

## Conclusion and Recommendations

Based on our experience with virtual healthcare services, we recommend that our clients prioritize cybersecurity measures and invest in robust IT infrastructure to ensure seamless operations. By doing so, they can minimize downtime and maintain high levels of patient satisfaction.

## Conclusion

In conclusion, our IT infrastructure upgrade cycle length has shown a consistent trend over the past few years, with notable fluctuations in 2024. This report highlights the importance of monitoring and optimizing IT infrastructure upgrades to ensure seamless operations and patient care. Future plans should prioritize IT infrastructure upgrade cycle length reduction and cost optimization. Recommendations include implementing a centralized IT infrastructure upgrade management system and conducting regular IT infrastructure upgrade cycle assessments.
