# Supplementary material
Source: ML conference proceedings conference paper supplement (https://openreview.net/forum?id=IGYQ4c92e2)
Supplement: supplementary_material [file IT-Infrastructure-Upgrade-Cycle-Analysis.docx]

# IT Infrastructure Upgrade Cycle Analysis

## Introduction

This analysis aims to provide insights into our IT infrastructure upgrade cycles, highlighting trends and areas for improvement. As a key stakeholder, it is essential to understand the impact of these upgrades on our virtual healthcare services. This report will explore the benefits and challenges of our IT infrastructure upgrade cycles, providing actionable recommendations for future improvements.

## IT Infrastructure Upgrade Cycle Overview

Our IT infrastructure has undergone significant changes in recent years, with a focus on cloud-based solutions and scalable infrastructure. This shift has enabled us to better support our growing team and increase collaboration across departments. Notably, our IT department has seen a 20% reduction in helpdesk tickets since implementing these changes. We anticipate this trend to continue as we continue to refine our IT processes.

## Impact of Remote Healthcare on IT Cycles

The shift to remote healthcare has led to increased demand for secure and reliable IT infrastructure. Our team has worked diligently to ensure seamless integration of our digital platforms, resulting in a 15% reduction in IT-related complaints. As we continue to adapt to this new landscape, we expect to see further improvements in IT performance and customer satisfaction.

## Current IT Infrastructure Upgrade Cycle Challenges

Our IT team has been working to address several pressing issues, including network congestion and server downtime. To mitigate these issues, we have implemented a new server architecture and upgraded our network infrastructure. These changes have significantly reduced downtime and improved overall system performance.

## Average IT Upgrade Cycle Timeframe

Our IT team has been working to establish a more standardized approach to IT upgrades, with a focus on reducing downtime and improving system performance. This effort has been met with success, with an average of 3 days' downtime per quarter. We expect to see continued improvements in this area as we refine our IT processes.

## IT Infrastructure Upgrade Cycle Insights

Our IT team has been tracking various key performance indicators (KPIs) to measure the success of our IT upgrades. One notable trend is the increase in helpdesk ticket resolution time, which has decreased by 30% over the past year. This suggests that our IT upgrades have been effective in improving system performance.

## Future IT Infrastructure Upgrade Cycle Strategies

As we continue to adapt to the demands of remote healthcare, we anticipate a need for further IT infrastructure upgrades to ensure seamless integration of our digital platforms. To address this, our IT team is exploring new technologies and solutions to improve system performance and reduce downtime.

## Conclusion and Recommendations

In conclusion, our IT team has made significant strides in improving system performance and reducing downtime. To build on this success, we recommend continuing to invest in IT upgrades and exploring new technologies to further improve our digital platforms. By doing so, we can ensure continued success in the remote healthcare space.

## Conclusion

In conclusion, our IT infrastructure upgrade cycles have a significant impact on our virtual healthcare services. To improve these cycles, we recommend implementing a more streamlined process, increasing communication among teams, and considering predictive maintenance. This report provides a solid foundation for future improvements, and we encourage stakeholders to review and provide feedback.
