# Supplementary material
Source: ML conference proceedings conference paper supplement (https://openreview.net/forum?id=IGYQ4c92e2)
Supplement: supplementary_material [file IT-Outsourcing-Landscape-Report.docx]

# IT Infrastructure Outsourcing Landscape Report

## Introduction

This report provides an overview of our IT infrastructure outsourcing strategy, highlighting key trends and insights that inform our decision-making process.

## IT Outsourcing Framework

Our company has long-standing relationships with top-tier software vendors, leveraging their expertise to enhance our in-store experiences. For instance, our partnership with SAP has led to significant improvements in inventory management and supply chain optimization. As we continue to expand our e-commerce capabilities, we're exploring new opportunities with vendors like Shopify and Magento. By fostering these relationships, we can stay ahead of the curve in the rapidly evolving retail landscape.

## Third-Party Provider Analysis

Our logistics team has been working closely with third-party providers to optimize our delivery services. By streamlining our routes and leveraging data analytics, we've reduced our carbon footprint by 12% over the past 18 months. As we continue to grow, we're exploring new opportunities with providers like UPS and FedEx to enhance our delivery options and improve customer satisfaction.

## Cost Savings Strategies

Our procurement team has developed a robust strategy to reduce costs across our supply chain. By implementing lean manufacturing principles and optimizing our inventory management, we've saved an average of 8% on our annual procurement costs. As we prepare for our upcoming product line expansion, we're exploring new opportunities to reduce waste and minimize our environmental impact.

## Outsourcing Partnerships Assessment

Our IT department has been working closely with our HR team to develop a comprehensive onboarding program for new hires. By leveraging our existing infrastructure and partnering with vendors like Workday, we've streamlined our onboarding process and reduced new hire training time by 30%. As we continue to grow, we're exploring new opportunities to enhance our employee engagement and retention strategies.

## Conclusion

This report highlights the importance of strategic outsourcing in optimizing our IT infrastructure. Recommendations for future outsourcing partnerships and cost savings initiatives are presented, aiming to improve operational efficiency and reduce costs.
