# Supplementary material
Source: ML conference proceedings conference paper supplement (https://openreview.net/forum?id=IGYQ4c92e2)
Supplement: supplementary_material [file it-performance-review.pdf › drbench/data/tasks/DR0001/files/DI002_pdf/it-performance-review.pdf]

# Q2 2024 IT Performance Review Report

## Introduction

As the IT Operations Manager at Lee's Market, I am responsible for ensuring the smooth operation of our IT systems. This report provides an overview of our IT performance in Q2 2024, highlighting key areas of focus and opportunities for improvement. The purpose of this report is to inform stakeholders of our progress and provide recommendations for future enhancements. By reviewing our IT performance, we can optimize our systems to better support business operations and drive growth.

## IT Service Management Process Review

Lee's Market IT department has been utilizing the ITIL framework since 2020, allowing for streamlined incident management and improved service desk operations. Our team has reported a 25% reduction in mean time to resolve (MTTR) incidents over the past year, resulting in increased productivity and efficiency. Additionally, we have implemented a comprehensive training program for all IT staff, ensuring they are up-to-date on the latest ITIL best practices. This training program has been well-received, with a 95% satisfaction rate among participants.

## System Uptime and Downtime Analysis

In Q1 2024, our e-commerce platform experienced a significant surge in traffic, with a 30% increase in online orders compared to the same period last year. This growth can be attributed to our targeted marketing campaigns and the introduction of new product lines. To ensure optimal performance, we have been conducting regular load testing and performance optimization on our e-commerce platform. These efforts have resulted in a 20% reduction in page load times, improving the overall customer experience.

## IT Incident Response and Resolution

Our IT department has established a robust incident response plan, which includes clear communication protocols and escalation procedures. In the event of a critical incident, our team is equipped to respond quickly and effectively, minimizing the impact on business operations. We have also implemented a root cause analysis (RCA) process to identify and address underlying issues, reducing the likelihood of recurring incidents. This proactive approach has led to a 15% reduction in repeat incidents over the past six months.

## Change Management and Implementation

Lee's Market has been investing heavily in digital transformation initiatives, with a focus on cloud migration and infrastructure modernization. Our IT team has developed a comprehensive change management strategy, which includes stakeholder engagement, risk assessment, and thorough testing. This approach has enabled us to successfully deploy several major system upgrades, including a recent migration to a cloud-based ERP system. The new ERP system has improved inventory management and reduced costs by 12%.

## IT Infrastructure Upgrade Recommendations

As part of our ongoing efforts to enhance IT infrastructure, we have been evaluating emerging technologies such as edge computing and hyper-converged infrastructure (HCI). Our team has conducted thorough research and analysis, weighing the benefits and drawbacks of each technology. Based on our findings, we recommend investing in HCI solutions to improve data center efficiency and reduce costs. This upgrade is expected to yield a 20% reduction in energy consumption and a 15% reduction in maintenance costs.

# Conclusion

In conclusion, our Q2 2024 IT performance review highlights areas of strength and opportunities for improvement. By addressing these key areas, we can optimize our IT systems to better support business operations and drive growth. I recommend implementing the proposed IT infrastructure upgrades and refining our IT service management processes to improve overall performance. By doing so, we can enhance our ability to deliver high-quality services to our customers and stakeholders.
