# Supplementary material
Source: ML conference proceedings conference paper supplement (https://openreview.net/forum?id=IGYQ4c92e2)
Supplement: supplementary_material [file it-performance-review.pdf › drbench/data/tasks/DR0015/files/qa_1755720659/it-performance-review.pdf]

# Q1 2025 IT Performance Review Report

## Introduction

As we continue to drive innovation in the electric vehicle market, it's essential that our IT infrastructure supports our growth. This report provides an overview of our IT performance in Q1 2025, highlighting key areas of focus and opportunities for improvement. The purpose of this review is to ensure our IT systems are aligned with our business objectives, particularly in regards to server reliability and uptime. This analysis will inform our strategic planning and resource allocation for the remainder of the year.

## Server Infrastructure Resilience and Redundancy Measures

In 2023, our IT department implemented a multi-phase server consolidation project, resulting in a 30% reduction in physical servers. This initiative not only reduced our carbon footprint but also allowed for more efficient resource allocation. Furthermore, we have been exploring the integration of cloud-based services to enhance our disaster recovery capabilities. As of February 2024, 80% of our critical systems have been successfully migrated to a hybrid cloud environment.

## IT Service Management Process Maturity Assessment

Our IT service management processes have been assessed against the ITIL 4 framework, with a focus on incident management and problem management. In Q4 2024, we conducted a thorough review of our service desk operations, resulting in a 25% reduction in mean time to resolve (MTTR) for non-critical incidents. Additionally, we have established a continuous improvement program to ensure ongoing process refinement and alignment with industry best practices. As of January 2025, 90% of our IT staff have completed ITIL 4 certification.

## Q1 2025 System Downtime Frequency Analysis

In Q1 2025, our customer-facing website experienced a 20% increase in traffic due to the launch of our new electric vehicle model. To ensure a seamless user experience, we implemented a content delivery network (CDN) to reduce page load times. Our marketing department reported a 15% increase in online engagement, with an average session duration of 3 minutes and 20 seconds. We are currently exploring opportunities to further optimize our website performance and improve customer engagement.

## Conclusion

In conclusion, our Q1 2025 IT performance review highlights the need for continued investment in our server infrastructure and IT service management processes. By prioritizing these areas, we can ensure our systems are more resilient and better equipped to support our business growth. The insights gained from this analysis will inform our strategic planning and resource allocation for the remainder of the year. Recommendations for improvement will be presented to the IT Steering Committee for review and approval.
