# Supplementary material
Source: ML conference proceedings conference paper supplement (https://openreview.net/forum?id=IGYQ4c92e2)
Supplement: supplementary_material [file it-security-report.pdf › drbench/data/tasks/DR0005/files/DI003_pdf/it-security-report.pdf]

# Q1 2024 IT Security Training Report

## Introduction

As we continue to expand our digital presence and protect our customers' sensitive information, it is essential that our employees are equipped with the necessary knowledge to prevent cyber threats. This report provides an overview of our IT security training initiatives in Q1 2024. The purpose of this document is to inform stakeholders about the progress of our security awareness program and identify areas for improvement. The insights presented in this report will inform our future training strategies and ensure the continued security of our systems.

## Cybersecurity Threat Landscape: Q1 2024 Update

The Q1 2024 cybersecurity threat landscape saw a significant increase in phishing attempts targeting retail companies, with 32% of attacks aimed at compromising employee login credentials. According to our threat intelligence feeds, this represents a 15% increase from Q4 2023. As a result, our IT department has enhanced email filtering protocols and implemented additional security measures to protect our systems. These measures have been in place since February 2024.

## Employee Engagement Strategies for IT Security

To promote a culture of security awareness, our internal communications team launched a quarterly newsletter in January 2024, highlighting best practices for password management and secure browsing habits. The newsletter is distributed to all employees and has received positive feedback, with 45% of recipients reporting they have implemented at least one recommended security practice. We plan to expand this initiative to include regular security-themed quizzes and incentives for employees who demonstrate good security hygiene. The first quiz is scheduled for April 2024.

## Security Awareness Training Participation Metrics

In 2023, we conducted a comprehensive review of our security awareness training program, which included analyzing participation rates and feedback from employees. The review revealed that employees in the finance department had the highest participation rates, with 92% completing the training within the allotted timeframe. We also identified areas for improvement, including the need for more engaging content and interactive modules. These findings have informed our approach to security awareness training in 2024.

## Incident Response Plan: Lessons Learned

In response to a minor security incident in Q4 2023, we activated our incident response plan and successfully contained the issue within 2 hours. A post-incident review revealed that our response team's communication protocols were effective, but there were opportunities for improvement in terms of escalation procedures. As a result, we have updated our incident response plan to include clearer escalation guidelines and additional training for response team members. These updates were implemented in January 2024.

## Recommendations for Future Training Initiatives

Based on industry trends and best practices, we recommend incorporating gamification elements and interactive simulations into our security awareness training program. This approach has been shown to increase employee engagement and retention rates, with some companies reporting a 30% increase in training completion rates. We also suggest exploring the use of AI-powered training tools to provide personalized learning experiences for employees. A feasibility study is planned for Q2 2024 to explore these options in more detail.

# Conclusion

In conclusion, our Q1 2024 IT security training initiatives have shown promising results, but there is still room for improvement. To address the evolving cyber threat landscape, we must continue to adapt our training strategies and ensure employee engagement. The recommendations outlined in this report will inform our future training initiatives and help us maintain a robust security posture. By prioritizing employee education and awareness, we can protect our customers' sensitive information and maintain the trust they have placed in us.
