# Supplementary material
Source: ML conference proceedings conference paper supplement (https://openreview.net/forum?id=IGYQ4c92e2)
Supplement: supplementary_material [file it-security-report.pdf › drbench/data/tasks/DR0009/files/qa_1755705614/it-security-report.pdf]

# **Q1 2025 IT Security Training Report**

## **Introduction**

As we continue to prioritize the security of our digital platforms, it is essential that we assess our employees' adherence to IT security protocols. This report provides an overview of our IT security training initiatives and employee participation. The purpose of this document is to inform stakeholders of our progress and identify areas for improvement. By doing so, we can ensure the continued integrity of our virtual healthcare services.

## **Employee Engagement and Security Awareness Initiatives**

Our company has implemented various employee engagement initiatives to boost morale, including team-building exercises, employee recognition programs, and flexible work arrangements. As of February 2024, we have seen a 25% increase in employee satisfaction ratings. Furthermore, our security awareness initiatives have been well-received, with a 90% open rate on our monthly security newsletters. We continue to monitor and adjust our initiatives to ensure a positive and secure work environment.

## **Q1 2025 Training Participation and Compliance Metrics**

In Q1 2025, our customer support team handled an average of 500 customer inquiries per week, with a 95% resolution rate within 24 hours. We also saw a significant reduction in average handling time, from 15 minutes to 10 minutes, due to process improvements. Our customer satisfaction ratings remained high, with an average rating of 4.5 out of 5 stars. We continue to monitor and refine our support processes to ensure excellent customer service.

## **Future IT Security Training and Development Strategies**

We are planning to launch a new virtual reality training program for our healthcare professionals in Q3 2025, which will enhance their clinical skills and patient care. The program will be developed in partnership with a leading medical simulation company and will be rolled out to all healthcare staff. We expect this program to improve patient outcomes and reduce medical errors. Our IT department will play a key role in ensuring the technical infrastructure supports this new program.

## **Conclusion**

In conclusion, our Q1 2025 IT security training initiatives have shown promising results, but there is still room for improvement. We must continue to emphasize the importance of employee participation and engagement in our security protocols. Moving forward, we will focus on refining our training programs to address emerging threats and ensure the continued security of our digital platforms. By doing so, we can maintain the trust of our patients and stakeholders.
