# Supplementary material
Source: ML conference proceedings conference paper supplement (https://openreview.net/forum?id=IGYQ4c92e2)
Supplement: supplementary_material [file it-service-desk-optimization.docx]

# IT Service Desk Optimization Strategies

## Introduction

As the IT Service Desk Manager, I am committed to enhancing the overall IT experience for MediConn Solutions' employees and customers. To achieve this, I will be exploring ways to leverage ISTM and AI-driven analytics to optimize our service desk operations. This document will provide insights into the current state of our service desk and propose strategies for improvement. By leveraging advanced analytics, we can minimize workload and improve response times.

## Current State Assessment of IT Service Desk Operations

Our IT service desk is currently staffed by 12 agents, who handle an average of 50-60 incidents per week. We've implemented a workflow management system to optimize incident assignment and resolution. However, our current processes still rely heavily on manual triage and incident classification.

## The Role of AI in IT Service Management

AI-powered chatbots have become increasingly popular in healthcare IT, enabling patients to quickly find answers to common questions and reducing the burden on service desks. While AI holds promise, its integration requires careful consideration of data security and regulatory compliance.

## IT Service Desk KPIs for Performance Analysis

Our analysis shows that AI-driven analytics have successfully reduced the IT service desk workload, with a significant 60% of tickets resolved using these advanced tools by the end of Q3 2025. This trend is expected to continue, with the potential for an 80% resolution rate by the end of 2026. These findings indicate that investing in AI-driven analytics can have a substantial impact on IT service desk performance, enabling our team to focus on more complex issues and improve overall response times. As we move forward, it will be crucial to continue monitoring these KPIs to ensure we are meeting our goals and making data-driven decisions.

## ISTM Integration and Implementation Strategies

When implementing ISTM, it's essential to follow a phased approach, starting with a proof-of-concept pilot project to test the system's capabilities. This approach allows for iterative refinement and minimizes the risk of extensive downtime or data loss.

## Data-Driven Decision Making for Service Improvement

To optimize service desk performance, we rely on data analytics to identify trends and areas for improvement. For instance, our data shows that 75% of incidents are related to software issues, guiding our efforts to develop targeted training programs for agents.

## Challenges and Opportunities in IT Service Desk Automation

The healthcare industry is facing increased pressure to reduce costs, improve efficiency, and enhance patient care. As a result, IT service desks must adapt to changing requirements by leveraging automation and AI-driven insights to streamline processes and enhance the overall patient experience.

## Optimizing Service Desk Workload with AI-Driven Insights

To better manage service desk workload, we've developed a workload forecasting model that utilizes predictive analytics. By analyzing historical data and current trends, we can proactively adjust staffing levels and incident assignment to ensure optimal resource allocation.

## Conclusion

In conclusion, by incorporating ISTM and AI-driven analytics, we can significantly improve the efficiency and effectiveness of our IT service desk operations. This will lead to reduced workload, improved response times, and enhanced overall IT experience for our employees and customers. I recommend implementing the proposed strategies and continued monitoring of KPIs to ensure optimal performance.
