# Supplementary material
Source: ML conference proceedings conference paper supplement (https://openreview.net/forum?id=IGYQ4c92e2)
Supplement: supplementary_material [file IT-Service-Efficiency-Optimization.pdf › drbench/data/tasks/DR0007/files/IN001/IT-Service-Efficiency-Optimization.pdf]

# IT Service Efficiency Optimization Strategies

## Introduction

As IT Service Desk Manager, I will explore ways to minimize workload and improve response times by leveraging ISTM and AI-driven analytics, ensuring a seamless experience for our employees and customers.

## IT Service Desk Performance Metrics Analysis

The latest metrics analysis reveals a significant increase in IT service desk workload, with an average of 150 tickets per day in Q2 2024, representing a 25% surge since Q1. This uptick in demand necessitates a closer examination of our current operations to optimize resource allocation and streamline processes. By leveraging ISTM and AI-driven analytics, we can effectively manage this increased workload and improve response times, ultimately enhancing the overall IT service experience for our employees and customers.

## AI-Driven Help Desk Automation Opportunities

The IT service desk team has been exploring the use of AI-powered chatbots to manage common IT inquiries from staff and patients, with the goal of reducing service desk workload and improving response times. While these initiatives show promise, they are still in the early stages of testing and implementation. In the meantime, the team is focusing on optimizing the existing IT service management framework to better support the company's growth and expansion goals.

## ISTM Integration with Existing IT Frameworks

The IT operation team has been working closely with the IT service management team to ensure a seamless integration of our IT service management framework with our existing IT infrastructure. This has involved developing custom integrations with our enterprise resource planning (ERP) system and customer relationship management (CRM) software. The goal is to provide a single, unified view of all IT assets and services across the organization.

## Data-Driven IT Service Management Best Practices

The IT service management team has been working to develop data-driven best practices for IT service delivery, including the use of key performance indicators (KPIs) and service level agreements (SLAs) to measure service quality and customer satisfaction. These initiatives are designed to improve the overall IT service experience for employees and customers, while also reducing costs and increasing efficiency. The team is currently reviewing industry benchmarks and best practices to inform their approach.

## AI-Powered Predictive Maintenance for IT Systems

The IT operations team has been exploring the use of predictive maintenance techniques, such as machine learning and advanced analytics, to identify potential IT system failures and perform proactive maintenance. This approach is designed to reduce downtime and improve overall IT system reliability. While these initiatives show promise, they are still in the early stages of testing and implementation.

## Conclusion

By implementing these strategies, we can reduce IT service desk workload, improve response times, and provide a better overall experience for our employees and customers. This requires a data-driven

approach, leveraging AI-driven analytics, and a thorough understanding of our IT service desk performance metrics.
