# Supplementary material
Source: ML conference proceedings conference paper supplement (https://openreview.net/forum?id=IGYQ4c92e2)
Supplement: supplementary_material [file IT-Service-Optimization.pdf › drbench/data/tasks/DR0007/files/qa_1755701049/IT-Service-Optimization.pdf]

# Optimizing IT Service Desk Efficiency

## Introduction

As MediConn Solutions continues to grow and expand its virtual healthcare services, the IT service desk plays a critical role in ensuring seamless operations and high-quality customer experiences. This document aims to explore opportunities for process improvements and technology integration to enhance IT service desk efficiency. By leveraging industry best practices and innovative solutions, we can minimize workload and improve response times, ultimately driving business success. This report provides an analysis of key areas for optimization and recommendations for future implementation.

## Impact of Employee Training on Service Quality

MediConn Solutions has invested heavily in employee training programs, with a focus on ITIL Foundation certification for all IT service desk staff. As of January 2023, 90% of our IT service desk team members have achieved ITIL Foundation certification, resulting in improved customer satisfaction ratings. Our customer satisfaction ratings have increased from 85% in Q4 2021 to 92% in Q4 2022, demonstrating the positive impact of our employee training initiatives. We plan to continue investing in employee training and development to further enhance our service quality.

## Leveraging AI-Driven Analytics for Proactive Issue Resolution

Our IT operations team has been exploring the use of AI-driven analytics for optimizing our IT asset management processes. By analyzing data from our Configuration Management System (CMS), we can identify trends and patterns in IT asset usage, enabling us to make informed decisions about hardware and software upgrades. In Q1 2023, we used AI-driven analytics to identify and replace 100 outdated laptops, resulting in a 20% reduction in IT support requests related to hardware issues. We plan to expand our use of AI-driven analytics to other areas of IT operations in the coming months.

## Implementing Key Performance Indicators for Service Desk Evaluation

In Q3 2022, we introduced a new set of Key Performance Indicators (KPIs) to measure the effectiveness of our IT service desk team. These KPIs include First Call Resolution (FCR) rate, Mean Time to Resolve (MTTR), and Customer Satisfaction (CSAT) ratings. As of Q1 2023, our FCR rate stands at 70%, MTTR is 2.5 hours, and CSAT rating is 92%. We use these KPIs to evaluate the performance of our IT service desk team and identify areas for improvement. Our goal is to achieve an FCR rate of 80% and MTTR of 2 hours by the end of Q2 2023.

## Assessing Current IT Service Desk Processes

Our analysis of Q2 2024 IT service desk operations reveals a significant opportunity for process optimization. A substantial portion of staff hours, approximately 30%, were dedicated to routine tasks, amounting to around 500 hours. This finding suggests that implementing AI-driven automation and analytics can yield considerable benefits in terms of workload reduction and response time improvement. By leveraging these technologies, we can potentially redirect a substantial amount of staff time towards more complex and high-value tasks, ultimately enhancing the overall IT service experience for our employees and customers.

## Conclusion

In conclusion, optimizing IT service desk efficiency is crucial for MediConn Solutions' continued growth and success. By implementing process improvements, leveraging AI-driven analytics, and enhancing employee training, we can significantly minimize workload and improve response times. The

recommendations outlined in this report provide a roadmap for achieving these goals, and we look forward to working with stakeholders to implement these changes. Next steps will involve collaborating with the IT operations team to develop a detailed implementation plan and timeline.
