# Supplementary material
Source: ML conference proceedings conference paper supplement (https://openreview.net/forum?id=IGYQ4c92e2)
Supplement: supplementary_material [file it-training-report.pdf › drbench/data/tasks/DR0005/files/DI009_pdf/it-training-report.pdf]

# Q1 2024 IT Training and Development Report

## Introduction

As we continue to expand our operations and invest in digital transformation, it is essential that our employees possess the necessary IT skills to drive business growth. The purpose of this report is to provide an overview of our IT training initiatives in Q1 2024. This document will highlight key areas of focus, progress, and opportunities for improvement. The insights and recommendations presented in this report will inform our future IT training strategies and investments.

## Employee Engagement and Participation Trends

Our Q2 2023 employee feedback survey revealed a 25% increase in employee satisfaction with internal communication channels. This uptick correlates with the introduction of our new company-wide intranet platform, launched in January 2023. As a result, departmental collaboration has improved, with 30% more cross-functional projects initiated in the first half of 2023 compared to the same period in 2022. The HR department is now exploring ways to further enhance employee engagement through targeted workshops and training programs.

## IT Training Program Effectiveness and Evaluation

The IT department has been evaluating the feasibility of adopting a new learning management system (LMS) to streamline employee training processes. In a recent trial, the proposed LMS demonstrated a 40% reduction in course administration time and a 20% increase in user engagement. However, further analysis is required to assess the system's compatibility with our existing IT infrastructure and ensure a seamless integration. A final decision on LMS adoption is expected by the end of Q3 2024.

## Training Completion Rates and Compliance Analysis

In 2022, we achieved a 95% compliance rate with industry-mandated health and safety training across all store locations. This accomplishment reflects our ongoing commitment to maintaining a safe working environment and adhering to regulatory requirements. To further enhance our compliance tracking, the risk management team is implementing a new monitoring system, which is expected to reduce administrative burdens by 15%. The system's rollout is slated for completion by the end of Q2 2024.

## Digital Literacy and Skills Gap Assessment

Our 2023 digital literacy assessment revealed that 80% of employees possess intermediate or advanced digital skills, with the majority demonstrating proficiency in Microsoft Office applications. However, the assessment also identified a need for improvement in data analysis and visualization skills, particularly among non-managerial staff. To address this gap, the training department is developing targeted workshops, which will be offered starting in Q3 2024. These workshops aim to enhance employees' ability to work with data and drive business insights.

## Future IT Training Initiatives and Recommendations

To support the company's growth and expansion, the IT department is planning to introduce a new cybersecurity awareness program, which will be mandatory for all employees. The program aims to educate staff on best practices for data protection and phishing prevention, reducing the risk of cyber threats. A pilot training session is scheduled for Q2 2024, with full program rollout expected by the end of the year. This initiative aligns with our strategic objective of maintaining a secure IT environment.

## Conclusion

In conclusion, our Q1 2024 IT training initiatives have shown promising results, but there are areas for improvement. To address the identified skills gaps and increase training completion rates, we recommend revising our training programs and expanding our online course offerings. By investing in our employees' IT skills, we can drive business growth, enhance operational efficiency, and improve customer satisfaction. We will continue to monitor progress and adjust our strategies as needed to ensure the success of our IT training initiatives.
