# Supplementary material
Source: ML conference proceedings conference paper supplement (https://openreview.net/forum?id=IGYQ4c92e2)
Supplement: supplementary_material [file leadership-report-q1.pdf › drbench/data/tasks/DR0005/files/DI005_pdf/leadership-report-q1.pdf]

# Q1 2024 Leadership Development Report

## Introduction

As part of our ongoing efforts to enhance employee growth and development, this report highlights key initiatives and metrics related to leadership training and development at Lee's Market. The purpose of this document is to provide stakeholders with a comprehensive overview of our Q1 2024 leadership development programs. This report will inform future talent development strategies and optimize our investment in employee growth. The following sections outline our key findings and recommendations.

## Leadership Competency Framework Overview

Lee's Market introduced its Leadership Competency Framework in Q3 2022, outlining key skills for future leaders. Developed in collaboration with external consultants, the framework focuses on strategic thinking, effective communication, and adaptability. By Q4 2022, all department heads had undergone training on the new framework, resulting in an 85% increase in cross-functional collaboration. This initiative laid the groundwork for future leadership development programs.

## Employee Engagement and Participation Trends

According to our 2023 Employee Engagement Survey, 78% of Lee's Market employees reported feeling invested in the company's growth and success. This trend is reflected in the 25% increase in employee-led innovation projects over the past year, with the majority focusing on improving customer experience. To build on this momentum, the HR department is launching a new recognition and rewards program in Q2 2024. This initiative aims to further boost employee morale and motivation.

## Q1 Leadership Training Participation Metrics

In Q1 2024, Lee's Market saw a significant increase in customer satisfaction ratings, with 92% of customers reporting a positive shopping experience. This uptick is attributed to the implementation of new customer service protocols across all store locations. As part of this initiative, 150 employees completed a comprehensive customer service training program, resulting in improved issue resolution rates and enhanced overall customer experience.

## Training Program Effectiveness and ROI Analysis

To optimize training program ROI, Lee's Market has implemented a robust evaluation framework, assessing program effectiveness across multiple metrics, including participant engagement, knowledge retention, and business impact. In 2023, this framework was applied to our store manager training program, revealing a 12% increase in sales growth among participating stores. These insights inform our training program development, ensuring maximum return on investment.

## Future Leadership Development Initiatives and Recommendations

As part of our ongoing commitment to employee growth, Lee's Market is launching a mentorship program in Q3 2024, pairing high-potential employees with experienced leaders. This initiative aims to foster a culture of knowledge sharing, innovation, and leadership development. To support this program, we are developing a comprehensive mentorship framework, outlining clear goals, expectations, and evaluation criteria.

## Conclusion

In conclusion, our Q1 2024 leadership development initiatives have shown promising results, with notable increases in employee participation and engagement. To build on this momentum, we recommend expanding our training programs to include more specialized tracks and increasing our investment in leadership development resources. By doing so, we can further enhance our talent pipeline and drive business growth. Next steps will involve presenting these findings to the executive team and securing approval for our proposed initiatives.
