# Supplementary material
Source: ML conference proceedings conference paper supplement (https://openreview.net/forum?id=IGYQ4c92e2)
Supplement: supplementary_material [file Lees_Market_Compliance_Training_Metrics_Report.xlsx]

## Sheet: Compliance Training Metrics
Period	Employee Group	Compliance Training Completion Rate	Target Completion Rate	Status
The quarter and year for which the compliance training metrics are reported.	The specific group of employees for which the compliance training metrics are reported (e.g., all employees, new hires, department-specific).	The percentage of employees in the specified group who completed compliance training during the reported period.	The target percentage of employees expected to complete compliance training during the reported period.	Indicates whether the actual completion rate met, exceeded, or fell short of the target completion rate.
Q2 2023	All employees	0.78	0.8	Fell short
Q1 2022	Lee's Market employees	0.78	0.8	Fell short
Q1 2023	Lee's Market employees	0.8	0.8	Met
Q3 2023	New hires	0.88	0.85	Met
Q1 2024	Lee's Market employees	0.92	0.85	Exceeded
Q3 2022	New hires	0.85	0.85	Met
Q2 2022	All employees	0.75	0.8	Fell short
Q4 2023	Department A	0.82	0.8	Met
Q4 2022	Department B	0.8	0.8	Met
