# Supplementary material
Source: ML conference proceedings conference paper supplement (https://openreview.net/forum?id=IGYQ4c92e2)
Supplement: supplementary_material [file Lees_Market_Cust_Service_Call_Volume_Q2.xlsx]

## Sheet: Customer_Service_Call_Volume_Q2
Month	Average_Call_Volume	Chatbot_Interactions	Potential_Cost_Savings	Call_Volume_Change_Percentage
The specific month in Q2 2024 for which the call volume is recorded. Helps track trends over the quarter.	The average number of customer service calls received in a month. Useful for assessing call center load and resource allocation.	Number of interactions handled by the chatbot, indicating its usage relative to call volume.	Estimated cost savings from using chatbots instead of live agents for handling service calls.	The percentage change in call volume compared to the previous month, indicating trends or anomalies.
May 2024	4900	1480	$9,750.00	2.08%
April 2024	4550	1320	$8,200.00	-1.11%
June 2024	4800	1500	$9,500.00	-2.04%
May 2024	4800	1450	$9,500.00	2.13%
June 2024	5000	1500	$10,000.00	0.00%
April 2024	4700	1400	$9,000.00	4.44%
April 2024	4600	1350	$8,500.00	2.22%
May 2024	4700	1420	$9,000.00	2.17%
June 2024	4900	1520	$9,800.00	2.08%
May 2024	4600	1400	$8,500.00	1.10%
April 2024	4500	1300	$8,000.00	0.00%
