# Supplementary material
Source: ML conference proceedings conference paper supplement (https://openreview.net/forum?id=IGYQ4c92e2)
Supplement: supplementary_material [file Lees_Market_Customer_Retention_Metrics.xlsx]

## Sheet: Customer Retention Metrics
Time Period	Customer Retention Rate	Customer Segment	Customer Count	Retention Goal
The specific quarter or time frame for which customer retention is being measured.	The percentage of customers retained during the specified time period.	The specific customer segment being measured, such as location or demographic.	The total number of customers in the specified segment during the time period.	The target customer retention rate for the specified time period.
Q2 2024	0.5	Competitor B	1100	0.6
Q3 2023	0.56	Lee's Market	850	0.65
Q2 2024	0.62	Lee's Market	1000	0.65
Q2 2024	0.45	Competitor C	1000	0.6
Q1 2024	0.59	Lee's Market	950	0.65
Q4 2023	0.58	Lee's Market	900	0.65
Q2 2023	0.55	Lee's Market	800	0.65
Q2 2024	0.55	Competitor A	1200	0.6
Q1 2023	0.53	Lee's Market	750	0.65
Q4 2022	0.52	Lee's Market	700	0.65
