# Supplementary material
Source: ML conference proceedings conference paper supplement (https://openreview.net/forum?id=IGYQ4c92e2)
Supplement: supplementary_material [file Lees_Market_Customer_Satisfaction_Analysis.xlsx]

## Sheet: Customer_Satisfaction_Analysis
Quarter	Support_Channel	Satisfaction_Rating	Change_From_Previous_Quarter
The fiscal quarter during which the customer satisfaction data was collected, e.g., 'Q3 2023'.	The type of customer support channel evaluated, such as 'Phone', 'Email', 'Chatbot', etc.	The average customer satisfaction rating for the specified support channel during the specified quarter.	The percentage change in customer satisfaction rating from the previous quarter. A negative value indicates a drop.
Q1 2023	Phone	84.00%	0.00%
Q3 2023	Chatbot	78.00%	3.00%
Q3 2023	Email	85.00%	2.00%
Q2 2023	Email	83.00%	5.00%
Q1 2023	Chatbot	74.00%	2.00%
Q2 2023	Chatbot	75.00%	-1.00%
Q4 2022	Email	81.00%	-2.00%
Q3 2023	Phone	80.00%	-5.00%
Q4 2022	Phone	84.00%	3.00%
Q1 2023	Email	78.00%	-3.00%
Q2 2023	Phone	85.00%	1.00%
