# Supplementary material
Source: ML conference proceedings conference paper supplement (https://openreview.net/forum?id=IGYQ4c92e2)
Supplement: supplementary_material [file Lees_Market_Employee_Training_Budget_Allocation.xlsx]

## Sheet: Employee Training Budget Alloca
Quarter	Year	Training Budget	Department	Location
Quarter of the year for which the training budget is allocated (e.g. Q1, Q2, Q3, Q4)	Year for which the training budget is allocated	Total amount allocated for employee training during the specified quarter and year	Department or team within Lee's Market that the training budget is allocated for (e.g. Sales, Marketing, Operations)	Geographic location within Lee's Market where the training budget is allocated (e.g. Region, Store, Warehouse)
Q1	2024	400000	Marketing	Warehouse
Q4	2022	150000	Sales	Store
Q2	2022	120000	Operations	Region
Q1	2023	200000	Sales	Store
Q3	2024	750000	Operations	Region
Q2	2023	250000	Marketing	Warehouse
Q2	2024	500000	Operations	Region
Q4	2023	350000	Sales	Store
Q3	2023	300000	Operations	Region
Q3	2022	180000	Sales	Store
Q1	2022	100000	Marketing	Warehouse
