# Supplementary material
Source: ML conference proceedings conference paper supplement (https://openreview.net/forum?id=IGYQ4c92e2)
Supplement: supplementary_material [file Lees_Market_Employee_Training_Metrics.xlsx]

## Sheet: Employee Training Metrics
Quarter	Year	Training Program	Completion Rate	Number of Participants
The quarter of the year for which the training metrics are reported.	The year for which the training metrics are reported.	The name of the employee training program.	The percentage of employees who completed the training program.	The total number of employees who participated in the training program.
Q3	2024	Employee Training Program	0.85	150
Q1	2022	Employee Training Program	0.55	80
Q2	2023	Communication Skills	0.75	120
Q4	2022	Employee Training Program	0.7	110
Q2	2024	Data Analysis	0.7	100
Q4	2023	Team Building	0.8	130
Q1	2023	Leadership Development	0.7	100
Q1	2024	Employee Onboarding	0.6	90
Q2	2022	Employee Training Program	0.6	90
Q3	2022	Employee Training Program	0.65	100
Q3	2023	Time Management	0.65	110
