# Supplementary material
Source: ML conference proceedings conference paper supplement (https://openreview.net/forum?id=IGYQ4c92e2)
Supplement: supplementary_material [file Lees_Market_Employee_Training_Statistics.xlsx]

## Sheet: Employee_Training_Statistics
Quarter	Training_Type	Number_of_Employees_Trained	Impact_on_Business_Strategy
The fiscal quarter during which the training occurred, e.g., 'Q1 2024'.	The type of training completed by employees, e.g., 'Compliance Training'.	The number of employees who completed the specified training during the quarter.	A brief statement on how the training impacts business strategies or operations.
Q3 2023	Safety Training	180	Ensures workplace safety, reducing incident rates.
Q3 2023	Diversity and Inclusion	160	Promotes an inclusive work culture, enhancing team dynamics.
Q2 2023	Customer Service	140	Improves customer interaction, enhancing customer satisfaction.
Q4 2023	Technical Skills	200	Improves technical proficiency to support product innovation.
Q1 2024	Compliance Training	300	Compliance training figures do not impact chatbot strategies for consumer experience.
Q4 2023	Leadership Development	150	Enhances leadership skills aligning with strategic goals.
Q2 2023	Project Management	130	Boosts project efficiency and delivery timelines.
