# Supplementary material
Source: ML conference proceedings conference paper supplement (https://openreview.net/forum?id=IGYQ4c92e2)
Supplement: supplementary_material [file Lees_Market_Employee_Training_Status_Report.xlsx]

## Sheet: Employee_Training_Completion
Training_Program	Completion_Count	Quarter	Year	Training_Impact
The name of the training program completed by employees. Relevant for identifying different training initiatives within Lee's Market.	The number of employees who have completed the specified training program. This metric helps in assessing the reach and effectiveness of training initiatives.	The fiscal quarter during which the training program was completed. Used for temporal analysis of training completions.	The year when the training program was completed. Allows for long-term tracking and comparison of training participation.	A qualitative assessment of the impact of the training program on business operations. Could include notes on compliance improvements or operational efficiencies.
Technical Skills Upgrade	180	Q2	2024	Increased operational efficiency
Health and Wellness	130	Q2	2023	Reduced absenteeism
Sales Techniques	160	Q1	2024	Boosted sales performance
Safety Training	250	Q1	2025	Improved compliance and awareness
Time Management	140	Q3	2023	Improved productivity
Customer Service Training	150	Q4	2024	Enhanced customer interaction skills
Diversity and Inclusion	170	Q4	2023	Better team collaboration
Cybersecurity Awareness	110	Q4	2022	Reduced security incidents
Leadership Development	200	Q3	2024	Improved team management
Conflict Resolution	120	Q1	2023	Improved workplace harmony
