# Supplementary material
Source: ML conference proceedings conference paper supplement (https://openreview.net/forum?id=IGYQ4c92e2)
Supplement: supplementary_material [file Lees_Market_Employee_Turnover_Metrics.xlsx]

## Sheet: Employee Turnover Metrics
Quarter	Year	Employee Turnover Rate	Total Employees	New Hires	Departures
The quarter of the year for which the employee turnover rate is being reported.	The year for which the employee turnover rate is being reported.	The percentage of employees who left the company during the quarter.	The total number of employees at the company during the quarter.	The number of new employees hired during the quarter.	The number of employees who left the company during the quarter.
Q3	2023	0.1	480	40	48
Q4	2023	0.11	490	45	53
Q2	2024	0.11	490	45	53
Q3	2024	0.12	500	50	60
Q2	2023	0.09	460	35	41
Q1	2023	0.08	450	30	36
Q1	2024	0.1	480	40	48
