# Supplementary material
Source: ML conference proceedings conference paper supplement (https://openreview.net/forum?id=IGYQ4c92e2)
Supplement: supplementary_material [file Lees_Market_Employee_Turnover_Rates.xlsx]

## Sheet: Employee Turnover Rates by Quar
Company Name	Quarter	Year	Employee Turnover Rate	Change from Previous Quarter
Name of the company for which employee turnover rate is being tracked	The quarter of the year for which employee turnover rate is being reported (e.g. Q1, Q2, Q3, Q4)	The year for which employee turnover rate is being reported	The percentage of employees who left the company during the quarter	The percentage change in employee turnover rate from the previous quarter
Fresh Mart	Q2	2023	0.11	0.01
Fresh Mart	Q2	2024	0.14	0.01
Lee's Market	Q3	2024	0.15	-0.03
Lee's Market	Q1	2024	0.16	0.02
Lee's Market	Q3	2023	0.14	0.02
Fresh Mart	Q3	2023	0.12	0.01
Fresh Mart	Q1	2023	0.1	0.02
Lee's Market	Q2	2023	0.12	0.01
Fresh Mart	Q1	2024	0.13	0.01
Lee's Market	Q2	2024	0.18	0.02
