# Supplementary material
Source: ML conference proceedings conference paper supplement (https://openreview.net/forum?id=IGYQ4c92e2)
Supplement: supplementary_material [file Lees_Market_Facility_Maintenance_Costs_Tracker.xlsx]

## Sheet: Facility Maintenance Costs
Period	Total Maintenance Cost	Monthly Average Cost	Cost as a Percentage of Revenue
The time period for which the facility maintenance costs are being reported (e.g. Q1 2024)	The total cost of facility maintenance for the reported period	The average monthly cost of facility maintenance for the reported period	The facility maintenance cost as a percentage of the company's revenue for the reported period
Q2 2023	900000	225000	0.04
Q2 2022	700000	175000	0.03
Q1 2024	1200000	300000	0.05
Q3 2023	1000000	250000	0.045
Q1 2022	600000	150000	0.025
Q3 2022	750000	187500	0.032
Q4 2022	850000	212500	0.038
Q1 2023	800000	200000	0.035
Q4 2023	1100000	275000	0.048
