# Supplementary material
Source: ML conference proceedings conference paper supplement (https://openreview.net/forum?id=IGYQ4c92e2)
Supplement: supplementary_material [file Lees_Market_Facility_Maintenance_Performance_Track.xlsx]

## Sheet: Facility Maintenance Performanc
Period	Total Requests	Resolved Requests	Resolution Rate
The time period for which facility maintenance performance is being reported (e.g. Q2 2024).	The total number of facility maintenance requests received during the period.	The number of facility maintenance requests resolved during the period.	The percentage of facility maintenance requests resolved during the period.
Q3 2022	500	425	0.85
Q2 2022	460	391	0.85
Q1 2022	400	340	0.85
Q1 2023	390	332	0.85
Q2 2024	540	459	0.85
Q1 2024	420	357	0.85
Q4 2022	520	442	0.85
Q2 2023	450	383	0.85
Q3 2023	510	434	0.85
Q4 2023	480	408	0.85
