# Supplementary material
Source: ML conference proceedings conference paper supplement (https://openreview.net/forum?id=IGYQ4c92e2)
Supplement: supplementary_material [file Lees_Market_IT_Budget_Allocation_2023.xlsx]

## Sheet: Lees Market IT Budget Allocatio
Year	Quarter	Total IT Budget	Cybersecurity Allocation	Cybersecurity Percentage	Other Initiatives Allocation
The fiscal year for the IT budget allocation.	The fiscal quarter for the IT budget allocation.	The total IT budget allocated for the specified quarter in USD.	The portion of the IT budget allocated specifically for cybersecurity initiatives.	The percentage of the total IT budget allocated to cybersecurity.	The remaining portion of the IT budget allocated to other IT initiatives apart from cybersecurity.
2024	Q4	2550000	1050000	0.41	1500000
2024	Q2	2500000	1000000	0.4	1500000
2025	Q2	2700000	1150000	0.43	1550000
2023	Q2	2100000	600000	0.29	1500000
2024	Q1	2300000	800000	0.35	1500000
2023	Q4	2200000	700000	0.32	1500000
2023	Q3	1900000	400000	0.21	1500000
2024	Q3	2400000	900000	0.38	1500000
2023	Q1	2000000	500000	0.25	1500000
2025	Q1	2600000	1100000	0.42	1500000
