# Supplementary material
Source: ML conference proceedings conference paper supplement (https://openreview.net/forum?id=IGYQ4c92e2)
Supplement: supplementary_material [file Lees_Market_IT_Infrastructure_Overview.xlsx]

## Sheet: IT Infrastructure Overview
Cloud-Based Infrastructure Percentage	Reporting Quarter	IT Infrastructure Type
Percentage of company's IT infrastructure that is cloud-based, indicating the level of cloud adoption.	Quarter and year for which the cloud-based infrastructure percentage is reported.	Type of IT infrastructure being reported, e.g. 'Total', 'Cloud-Based', 'On-Premises'.
0.42	Q1 2024	On-Premises
0.32	Q2 2024	On-Premises
0.7	Q2 2024	Total
0.65	Q1 2024	Total
0.53	Q4 2023	Cloud-Based
0.47	Q4 2023	On-Premises
0.58	Q1 2024	Cloud-Based
0.68	Q2 2024	Cloud-Based
0.55	Q3 2023	Total
0.6	Q4 2023	Total
