# Supplementary material
Source: ML conference proceedings conference paper supplement (https://openreview.net/forum?id=IGYQ4c92e2)
Supplement: supplementary_material [file Lees_Market_IT_Infrastructure_Spend_by_Quarter.xlsx]

## Sheet: IT Infrastructure Spend by Quar
Company Name	Quarter	IT Infrastructure Spend	Region	Business Segment
The name of the company.	The quarter in which the IT infrastructure spend occurred (e.g. Q1 2024, Q2 2024).	The total amount spent on IT infrastructure upgrades during the quarter.	The geographic region in which the IT infrastructure spend occurred (e.g. US, Canada).	The business segment that the IT infrastructure spend supports (e.g. Retail, Online Shopping).
Wilson's Market	Q4 2022	700000	Canada	Online Shopping
Lee's Market	Q2 2024	2500000	US	Retail
Johnson's Market	Q4 2023	1000000	Canada	Online Shopping
Anderson's Market	Q3 2022	600000	US	Retail
Davis' Market	Q2 2023	800000	Canada	Online Shopping
Williams' Market	Q3 2023	1200000	US	Retail
Miller's Market	Q1 2023	900000	US	Retail
Thomas' Market	Q2 2022	500000	Canada	Online Shopping
Smith's Market	Q1 2024	1500000	US	Retail
