# Supplementary material
Source: ML conference proceedings conference paper supplement (https://openreview.net/forum?id=IGYQ4c92e2)
Supplement: supplementary_material [file Lees_Market_Loyalty_Program_Performance_Metrics.xlsx]

## Sheet: Loyalty Program Performance
Period	Loyalty Program Members	Active Members	Engagement Rate	New Member Acquisitions
The quarter or time period for which loyalty program metrics are being reported.	The total number of customers enrolled in the loyalty program.	The number of loyalty program members who have engaged with the program during the reporting period.	The percentage of loyalty program members who are actively engaged with the program.	The number of new customers who joined the loyalty program during the reporting period.
2022-06-30	230000	57500	0.25	30000
2023-12-31	330000	82500	0.25	45000
2023-09-30	320000	80000	0.25	42000
2024-03-31	350000	87500	0.25	50000
2022-03-31	220000	55000	0.25	28000
2022-09-30	240000	60000	0.25	32000
2022-12-31	250000	62500	0.25	35000
2021-12-31	200000	50000	0.25	25000
2023-06-30	300000	75000	0.25	40000
