# Supplementary material
Source: ML conference proceedings conference paper supplement (https://openreview.net/forum?id=IGYQ4c92e2)
Supplement: supplementary_material [file Lees_Market_Loyalty_Program_Performance_Metrics.xlsx]

## Sheet: Loyalty Program Performance
Period	Loyalty Program Members	Member Growth Rate	Average Spend per Member	Total Spend
The quarter or time period for which the loyalty program metrics are being reported.	The total number of active loyalty program members at the end of the reporting period.	The percentage change in loyalty program members from the previous period.	The average spend per loyalty program member during the reporting period.	The total spend by loyalty program members during the reporting period.
Q4 2023	880000	0.06	23	20240000
Q3 2022	730000	0.01	20.5	14965000
Q2 2024	1050000	0.1	24	25200000
Q2 2023	790000	0.04	22	17380000
Q4 2022	740000	0.02	21	15540000
Q1 2024	950000	0.08	23.5	22325000
Q1 2023	760000	0.03	21.5	16340000
Q2 2022	720000	0.005	20	14400000
Q3 2024	1200000	0.15	25	30000000
Q3 2023	830000	0.05	22.5	18675000
