# Supplementary material
Source: ML conference proceedings conference paper supplement (https://openreview.net/forum?id=IGYQ4c92e2)
Supplement: supplementary_material [file Lees_Market_Marketing_Expenses_Q3_2024.xlsx]

## Sheet: Marketing_Expenses_Q3_2024
Expense_Category	Amount	Percentage_of_Total	Date_Reported
The category of marketing expense, such as digital advertising, print media, etc.	The amount spent on the marketing category in USD.	The percentage of the total marketing expenses that this category represents.	The date when the expense report was submitted.
Digital Advertising	$1,200,000.00	40.00%	2024-09-30
Billboards	$150,000.00	5.00%	2024-08-20
Sponsorships	$200,000.00	6.67%	2024-07-25
Social Media	$400,000.00	13.33%	2024-09-15
Radio	$250,000.00	8.33%	2024-09-05
Print Media	$500,000.00	16.67%	2024-07-15
Television	$300,000.00	10.00%	2024-08-10
