# Supplementary material
Source: ML conference proceedings conference paper supplement (https://openreview.net/forum?id=IGYQ4c92e2)
Supplement: supplementary_material [file Lees_Market_Online_Sales_Growth_Report.xlsx]

## Sheet: Online Sales Growth
Period	Sales Channel	Growth Rate	Sales Amount	Previous Period Sales
The time period for which online sales growth is being measured (e.g., Q2 2024 vs Q2 2023).	The channel through which online sales are being made (e.g., website, mobile app, delivery service).	The percentage change in online sales for the given period compared to the previous period.	The total amount of online sales for the given period.	The total amount of online sales for the previous period.
Q4 2022 vs Q4 2021	Lee's Market Delivery Service	5	60000	57142.9
Q1 2024 vs Q1 2023	Lee's Market Website	8	120000	111111
Q4 2023 vs Q4 2022	Lee's Market Mobile App	10	100000	90909.1
Q2 2024 vs Q2 2023	Lee's Market Website	12	150000	133929
Q1 2023 vs Q1 2022	Lee's Market Mobile App	7	70000	65421
Q3 2022 vs Q3 2021	Lee's Market Website	4	50000	48076.9
Q2 2022 vs Q2 2021	Lee's Market Mobile App	3	40000	38809.5
Q3 2023 vs Q3 2022	Lee's Market Delivery Service	6	80000	75472
Q2 2023 vs Q2 2022	Lee's Market Website	9	90000	82644.4
