# Supplementary material
Source: ML conference proceedings conference paper supplement (https://openreview.net/forum?id=IGYQ4c92e2)
Supplement: supplementary_material [file Lees_Market_Online_Shopping_Adoption_Q1_2023.xlsx]

## Sheet: Online_Shopping_Adoption_Q1_202
Quarter	Total_Customers	Online_Shoppers	Online_Shopping_Percentage
The fiscal quarter and year for which the data is reported, e.g., 'Q1 2024'.	The total number of customers of Lee's Market during the specified quarter.	The number of customers who used online shopping services during the specified quarter.	The percentage of total customers who used online shopping services during the specified quarter.
Q2 2022	380000	80000	0.211
Q1 2022	370000	75000	0.203
Q3 2023	430000	110000	0.256
Q1 2023	410000	95000	0.232
Q4 2023	450000	120000	0.267
Q4 2022	400000	90000	0.225
Q3 2022	390000	85000	0.218
Q2 2023	420000	100000	0.238
Q1 2024	500000	150000	0.3
