# Supplementary material
Source: ML conference proceedings conference paper supplement (https://openreview.net/forum?id=IGYQ4c92e2)
Supplement: supplementary_material [file Lees_Market_Quarterly_IT_Expenditures_Report.xlsx]

## Sheet: Quarterly IT Expenditures
Quarter	Total_IT_Costs	New_Hardware_Costs	Related_To_Initiatives
The fiscal quarter during which the IT costs were incurred, e.g., 'Q4 2024'.	The total amount spent on IT costs for the quarter, expressed in millions of dollars.	The amount spent specifically on new hardware within the total IT costs, expressed in millions of dollars.	Indicates whether the IT costs are related to specific initiatives such as chatbot implementation for centennial shoppers.
Q3 2023	1900-01-02 19:12:00	1900-01-01 02:24:00	TRUE
Q3 2024	1900-01-03 07:12:00	1900-01-01	FALSE
Q2 2023	1900-01-02 12:00:00	1900-01-01	FALSE
Q1 2023	1900-01-02 02:24:00	19:12:00	TRUE
Q1 2024	1900-01-02 21:36:00	1900-01-01 07:12:00	TRUE
Q4 2023	1900-01-03	1900-01-01 12:00:00	FALSE
Q4 2024	1900-01-03 09:36:00	1900-01-01 04:48:00	FALSE
Q2 2024	1900-01-03 04:48:00	1900-01-01 02:24:00	TRUE
