# Supplementary material
Source: ML conference proceedings conference paper supplement (https://openreview.net/forum?id=IGYQ4c92e2)
Supplement: supplementary_material [file Lees_Market_Supply_Chain_Automation_Metrics.xlsx]

## Sheet: Supply Chain Automation Metrics
Quarter	Automation Percentage	Process Area	Business Impact	Target Goal
The quarter of the year for which the supply chain automation metrics are being reported.	The percentage of supply chain operations that were automated during the quarter.	The specific area of the supply chain where automation was implemented (e.g. inventory management, shipping, etc.).	A brief description of the business impact of the automation (e.g. increased efficiency, reduced costs, etc.).	The target percentage of supply chain automation for the company.
Q1 2022	0.15	Quality Control	Improved product quality and reduced defect rates	0.5
Q3 2023	0.3	Order Fulfillment	Streamlined order processing and improved customer satisfaction	0.5
Q2 2023	0.28	Warehouse Management	Optimized inventory storage and reduced storage costs	0.5
Q3 2022	0.2	Risk Management	Identified and mitigated potential supply chain disruptions	0.5
Q2 2024	0.4	Inventory Management	Increased efficiency and reduced labor costs	0.5
Q1 2024	0.35	Shipping and Logistics	Improved delivery times and reduced transportation costs	0.5
Q1 2023	0.25	Demand Planning	Improved forecast accuracy and reduced stockouts	0.5
Q2 2022	0.18	Compliance and Governance	Ensured regulatory compliance and improved audit readiness	0.5
Q4 2023	0.32	Procurement	Enhanced supplier management and reduced material costs	0.5
Q4 2022	0.22	Supply Chain Visibility	Enhanced real-time tracking and monitoring	0.5
