# Supplementary material
Source: ML conference proceedings conference paper supplement (https://openreview.net/forum?id=IGYQ4c92e2)
Supplement: supplementary_material [file loyalty-engagement-strategies.pdf › drbench/data/tasks/DR0003/files/IN001_pdf/loyalty-engagement-strategies.pdf]

# Optimizing Loyalty for Customer Engagement

## Introduction

As Lee's Market continues to expand its regional presence, enhancing customer engagement through innovative marketing strategies becomes crucial. This report explores the potential of leveraging data-driven loyalty programs to deepen customer relationships and increase sales. By analyzing customer data and identifying key trends, we aim to optimize loyalty initiatives that resonate with our diverse audience. The following sections provide insights and strategic recommendations to enhance our marketing efforts.

## Analyzing Customer Purchase Behaviors

A 2021 study revealed that 70% of grocery shoppers prefer purchasing fresh produce in-store, while 30% favor online platforms for non-perishable items. Seasonal buying patterns, such as increased snack sales during sports seasons, were observed across urban centers. These behaviors indicate a diverse set of preferences that require a multifaceted retail approach. The data also showed a 15% increase in bulk-buying during holiday seasons.

## Data-Driven Loyalty Program Insights

Research from Q3 2023 indicates that loyalty program members spend 50% more than non-members over a six-month period. Retailers leveraging big data analytics have seen a 10% increase in personalized marketing efficiency. However, the primary focus remains on improving data collection processes. Despite advancements, 40% of retailers still face challenges in integrating real-time data streams into their CRM systems.

## Innovative Marketing Tactics for Engagement

In 2023, Lee's Market tested a new virtual reality (VR) store tour feature, resulting in a 25% uptick in website traffic. The initiative aimed to provide customers with an immersive shopping experience, showcasing product ranges and exclusive items. Furthermore, a social media campaign launched in March 2023 reported a 40% increase in brand mentions. These tactics highlight the company's commitment to integrating technology into marketing strategies.

## Evaluating Competitor Loyalty Strategies

Competitor analysis in 2023 shows that 55% of grocery chains have introduced tiered membership levels, offering exclusive discounts to premium members. These tiers are based on annual spending thresholds, incentivizing higher expenditure. Some competitors have also partnered with local businesses to offer co-branded rewards, enhancing community engagement. This approach aims to create a network of value beyond just grocery shopping.

## Current Market Trends in Retail Loyalty

In the evolving landscape of retail loyalty, leveraging AI-driven strategies can significantly enhance customer engagement. Our analysis indicates that implementing these advanced programs could result in a 4% increase in loyalty-driven sales by Q2 2024. This aligns with industry trends where AI integration is leading to notable improvements in sales and customer retention, as seen in other major grocery chains. By harnessing data-driven insights, Lee's Market can position itself to not only meet but exceed growth targets in loyalty engagement.

## Conclusion

This analysis highlights the strategic importance of incorporating data-driven loyalty programs to boost customer engagement at Lee's Market. By understanding customer behaviors and leveraging targeted loyalty initiatives, we can drive increased foot traffic and online interactions. Moving forward, implementing these insights will require coordination across departments and ongoing evaluation to ensure effectiveness. Let's focus on executing these strategies to reinforce our market position and foster customer loyalty.
