# Supplementary material
Source: ML conference proceedings conference paper supplement (https://openreview.net/forum?id=IGYQ4c92e2)
Supplement: supplementary_material [file loyalty-programs-insights.pdf › drbench/data/tasks/DR0003/files/IN003_pdf/loyalty-programs-insights.pdf]

# Enhancing Engagement Through Loyalty Programs

## Introduction

In today's competitive retail landscape, effective customer engagement strategies are crucial for sustained growth. At Lee's Market, we aim to integrate data-driven insights to enhance our loyalty programs. This document explores various themes related to optimizing customer interaction and retention. Our goal is to provide actionable insights for improving the overall customer experience.

## Segmenting Customers for Targeted Marketing

Lee's Market has identified five primary customer segments based on shopping behavior and demographic profiles. These include 'Cultural Enthusiasts,' who make up 25% of our customer base, and 'Health-Conscious Shoppers,' accounting for 18%. Marketing campaigns targeting these segments have historically shown a 12% higher engagement rate. Such segmentation aids in determining the appropriate product mix and store layouts across different regions.

## Leveraging Data for Loyalty Program Design

In 2021, Lee's Market invested in a new CRM system that aggregates customer data for better inventory management. This system enables automated restocking processes based on real-time sales data, reducing overstock by 10% annually. Additionally, the CRM supports personalized email marketing, which has increased open rates by 15%. This infrastructure is crucial for operational efficiency and customer communication but does not directly alter loyalty program features.

## Optimizing In-Store and Online Experiences

The recent rollout of self-checkout kiosks in 30% of Lee's Market locations has decreased average transaction time by 25%. Concurrently, the online platform has been upgraded with a new search algorithm that improves item discoverability by 40%. These enhancements have been part of a \$3 million investment in retail technology, aimed at increasing customer satisfaction and streamlining the shopping process. This approach focuses on operational improvements rather than loyalty strategies.

## Evaluating Customer Feedback Mechanisms

In 2023, Lee's Market implemented a new feedback collection method via SMS surveys, achieving a 20% response rate improvement over email surveys. The data collected has been instrumental in refining in-store signage and product placement strategies. Customer insights indicate a preference for clearer aisle indicators and multilingual support, which have been prioritized in upcoming store renovations. These feedback mechanisms enhance customer experience but do not pertain to loyalty engagement.

## Understanding Customer Purchase Patterns

In the second quarter of 2024, Lee's Market achieved a redemption rate of 35% for CRM-driven loyalty offers, underscoring the effectiveness of our personalized marketing strategies. By leveraging customer data, the campaign successfully engaged shoppers through tailored promotions, resulting in enhanced customer loyalty and increased market penetration. This outcome not only reflects our alignment with contemporary consumer preferences but also positions us favorably against competitors who struggle with loyalty fatigue. These insights will inform future initiatives, ensuring that our loyalty programs continue to resonate with our diverse customer base.

# Conclusion

This document highlights strategic areas for enhancing customer engagement through data-driven loyalty programs. By focusing on understanding purchase patterns and segmenting our customer base, we can tailor marketing efforts to meet their needs. Implementing these insights will help us strengthen customer relationships and drive sales. Next steps involve refining our strategies and measuring their impact on engagement metrics.
