# Supplementary material
Source: ML conference proceedings conference paper supplement (https://openreview.net/forum?id=IGYQ4c92e2)
Supplement: supplementary_material [file maintenance-cost-report.pdf › drbench/data/tasks/DR0005/files/DI008_pdf/maintenance-cost-report.pdf]

# Facility Maintenance Cost Analysis Report

## Introduction

As part of our ongoing effort to optimize operational expenses, this report provides an overview of Lee's Market facility maintenance costs and related trends. The purpose of this analysis is to identify areas for cost reduction and inform future budgeting decisions. Our facilities management team has compiled data on maintenance expenditures across all locations. This report summarizes key findings and provides recommendations for improvement.

## Facility Condition Assessment and Capital Planning

As part of our annual review, the facilities team conducted a comprehensive assessment of store conditions in January 2024, identifying areas for improvement in lighting and HVAC systems. Recommendations for capital expenditures were submitted to the finance department for review and inclusion in the FY2025 budget. Our goal is to allocate 5% of annual revenue towards capital projects, ensuring our stores remain modern and efficient. The assessment process involved collaboration with regional managers and maintenance staff to prioritize projects based on customer feedback and operational needs.

## Maintenance Budget Variance Analysis by Region

Historical data from Q1 2023 shows that our Western region experienced a 10% variance in maintenance budget due to unforeseen repairs, while the Eastern region came in 5% under budget. This discrepancy highlights the importance of regional factors in budget planning, such as weather conditions and store age. Moving forward, we will incorporate more granular data into our budgeting process to better account for these variables. The finance team is working closely with regional managers to refine our budgeting model and improve accuracy.

## Facility Maintenance Cost Drivers and Trends

Industry research suggests that the adoption of energy-efficient technologies can lead to significant cost savings in facility maintenance. According to a recent study, companies that invested in LED lighting and solar panels saw an average reduction of 15% in their energy bills. Our sustainability team is exploring opportunities to integrate these technologies into our stores, with a focus on reducing our carbon footprint and improving operational efficiency. We anticipate a 5-year ROI on these investments, aligning with our long-term strategic goals.

## Impact of Preventive Maintenance on Cost Savings

Our maintenance team has implemented a proactive approach to equipment maintenance, resulting in a 20% reduction in reactive repairs over the past 12 months. By scheduling regular check-ups and replacing worn parts, we can minimize downtime and extend the lifespan of our equipment. The next phase of this initiative will involve training our staff on advanced troubleshooting techniques, further reducing our reliance on external contractors. We expect this program to yield an additional 10% in cost savings by the end of 2025.

## Quarterly Maintenance Expense Breakdown by Category

In Q1 2024, we launched a new vendor management system to streamline our procurement process for maintenance supplies. The system has enabled us to better track expenses and negotiate more favorable contracts with our suppliers. As a result, we've seen a 5% reduction in costs associated with janitorial services and a 3% reduction in HVAC maintenance expenses. The procurement team is now

exploring opportunities to apply this system to other areas of our operations, such as construction and renovation projects.

## Conclusion

In conclusion, our analysis highlights the importance of proactive facilities management in controlling maintenance costs. We recommend implementing a comprehensive preventive maintenance program to minimize unexpected expenses. Additionally, we suggest revising our capital planning strategy to prioritize high-priority repairs and replacements. By implementing these recommendations, we can optimize our maintenance budget and improve overall operational efficiency.
