# Supplementary material
Source: ML conference proceedings conference paper supplement (https://openreview.net/forum?id=IGYQ4c92e2)
Supplement: supplementary_material [file manufacturing-equipment-report.pdf › drbench/data/tasks/DR0013/files/qa_1755714339/manufacturing-equipment-report.pdf]

# **Q2 2024 Manufacturing Equipment Update Report**

## **Introduction**

As part of our ongoing efforts to optimize manufacturing operations and meet growing demand for electric vehicles, this report provides an overview of key developments in our manufacturing equipment strategy during Q2 2024. The purpose of this document is to inform stakeholders of relevant updates and insights, ensuring alignment across departments. The following sections outline notable trends, challenges, and achievements in our manufacturing equipment landscape. This report is intended for internal use, supporting strategic decision-making and resource allocation.

## **Manufacturing Capacity Expansion Initiatives**

Our production planning team has been working closely with the operations department to optimize workflow and reduce production bottlenecks. As a result, we have seen a 12% increase in overall manufacturing efficiency since Q1 2023. Furthermore, the implementation of lean manufacturing principles has allowed us to allocate more resources to research and development, driving innovation and growth. This strategic initiative has positioned us for long-term success in the electric vehicle market.

## **Equipment Maintenance and Downtime Reduction Strategies**

In an effort to minimize equipment downtime, our maintenance team has implemented a proactive maintenance schedule, resulting in a 25% reduction in unplanned downtime since January 2024. Additionally, we have invested in advanced diagnostic tools, enabling our technicians to quickly identify and resolve issues. This proactive approach has allowed us to maintain a high level of production quality while reducing overall maintenance costs. We plan to continue refining our maintenance strategy to ensure optimal equipment performance.

## **New Manufacturing Equipment Purchases and Installations**

As part of our ongoing commitment to sustainability, we have been exploring opportunities to integrate renewable energy sources into our manufacturing facilities. In Q3 2023, we partnered with a leading solar panel provider to install a 500 kW solar array at our primary production facility. This initiative has not only reduced our carbon footprint but also provided a significant reduction in energy costs. We continue to seek innovative solutions to minimize our environmental impact.

## **Supplier Performance Evaluation and Quality Control**

Our procurement team has developed a comprehensive supplier evaluation program to ensure that all components meet our stringent quality standards. In Q2 2023, we conducted audits of 15 key suppliers, resulting in a 90% compliance rate with our quality requirements. We have worked closely with non-compliant suppliers to address issues and implement corrective actions. This proactive approach has helped us maintain a high level of product quality and reduce the risk of supply chain disruptions.

## **Capital Expenditure Forecast and Budgeting**

Our finance team has been working closely with department heads to develop a comprehensive capital expenditure plan for the next fiscal year. As part of this process, we have identified opportunities to optimize resource allocation and prioritize strategic investments. In FY2023, we allocated 30% of our

capital expenditure budget to research and development initiatives, driving innovation and growth. We plan to continue investing in key areas to maintain our competitive edge in the electric vehicle market.

## Conclusion

In conclusion, our Q2 2024 manufacturing equipment update reflects the company's commitment to investing in cutting-edge technology and optimizing production processes. Key takeaways from this report include the importance of proactive maintenance, strategic supplier management, and data-driven capital expenditure planning. Recommendations for future action include regular monitoring of equipment performance and continued exploration of innovative manufacturing solutions. By implementing these strategies, we can drive efficiency, reduce costs, and maintain our competitive edge in the electric vehicle market.
