# Supplementary material
Source: ML conference proceedings conference paper supplement (https://openreview.net/forum?id=IGYQ4c92e2)
Supplement: supplementary_material [file Market-Competition-Strategies.docx]

# Market Trends and Competitive Strategies

## Introduction

As Lee's Market continues to expand its presence in the retail market, it is crucial to stay ahead of the curve by understanding emerging trends and competitor strategies. This report aims to provide insights on the current market landscape and inform business decisions.

## Competitor Landscape Overview

In the past year, Lee's Market's competitors have demonstrated a focus on supply chain optimization, with many investing in logistics and transportation management systems. This shift towards more efficient supply chain management is a response to the increasing pressure to keep costs down and maintain profitability in the face of rising costs and changing consumer habits.

## In-Store Experience Trends

Recent studies have shown that in-store experiences can significantly influence customer loyalty and retention. To enhance the in-store experience, Lee's Market has introduced a loyalty program, offering personalized promotions and offers to its most loyal customers. This initiative has been well-received by customers and has contributed to increased repeat business.

## E-commerce Strategies and Growth

Lee's Market's e-commerce platform has seen steady growth in the past year, with sales increasing by 15% compared to the same period the previous year. This growth can be attributed to the company's investment in targeted marketing campaigns and its efforts to enhance the online shopping experience through improved product information and streamlined checkout processes.

## Market Analysis Framework

Recent analysis of our online transactions reveals a significant trend towards mobile device usage, with 60% of transactions made via mobile devices in Q3 2024, resulting in an average order value of $50. This insight underscores the importance of optimizing our mobile platform to cater to this growing customer segment. Furthermore, it highlights the need for a seamless and user-friendly online shopping experience to increase customer loyalty and drive sales.

## Staying Competitive in a Dynamic Market

Lee's Market has a strong commitment to employee training and development, with regular workshops and training sessions focused on customer service, product knowledge, and sales techniques. This investment in its workforce has yielded positive results, with customer satisfaction scores increasing by 5% over the past quarter.

## Conclusion

Based on the analysis, it is clear that Lee's Market must adapt to the changing retail landscape by embracing new trends and strategies. This report recommends exploring innovative in-store experiences and e-commerce solutions to remain competitive.
