# Supplementary material
Source: ML conference proceedings conference paper supplement (https://openreview.net/forum?id=IGYQ4c92e2)
Supplement: supplementary_material [file Market-Trends-and-Strategies.docx]

# Grocery Retail Market Trends Insights

## Introduction

As the retail landscape continues to evolve, it is crucial for Lee's Market to stay ahead of the curve. This report provides an in-depth analysis of the current grocery retail market trends, highlighting opportunities and challenges for our business.

## Emerging Trends in Grocery Retail

The rise of experiential shopping has seen a significant increase in the number of customers visiting Lee's Market's stores for in-store tastings and demonstrations. This trend has led to a 25% increase in sales of premium products over the past year, with customers willing to pay a premium for unique experiences. As Lee's Market continues to innovate, it is essential to balance the need for experiential shopping with the need for efficient inventory management.

## Competitor Analysis and Insights

A recent analysis of Lee's Market's competitors has revealed that Walmart is investing heavily in its e-commerce platform, with plans to expand its online grocery shopping capabilities to an additional 500 stores by the end of 2024. This move is a clear indication of the growing importance of e-commerce in the retail landscape, as customers increasingly turn to online shopping for convenience. Lee's Market must continue to monitor its competitors' moves to stay ahead of the curve.

## Customer Preferences and Behavior

Recent market research has highlighted the growing importance of sustainability in customer purchasing decisions, with 75% of customers stating that they are more likely to shop at a store that offers eco-friendly products. Lee's Market's commitment to reducing waste and implementing environmentally friendly practices is a key factor in its continued success, as customers increasingly prioritize the environmental impact of their shopping choices.

## Market Dynamics and Shifts

As Lee's Market navigates the competitive grocery retail landscape, recent analysis has highlighted the importance of efficient customer service in driving satisfaction. Our research indicates that customers are increasingly expecting rapid resolution of complaints, with an average time-to-resolution of just 2 hours in Q2 2025. This underscores the need for process improvements to enhance customer satisfaction, a key differentiator in an environment where price-sensitive shoppers are flocking to discounters. By streamlining our customer service operations, we can better position ourselves to compete with these value-focused retailers.

## Adapting to Change: Strategies for Success

Lee's Market's ongoing efforts to streamline its inventory management processes have resulted in a 15% reduction in inventory costs over the past year. This achievement is a testament to the company's commitment to operational efficiency, as it continues to adapt to the ever-changing retail landscape. As the market evolves, it is essential for Lee's Market to maintain its focus on operational excellence to ensure continued success.

## Future-Proofing Our Business

Lee's Market's commitment to investing in employee training and development has seen a significant increase in employee retention rates, with 90% of employees stating that they are satisfied with their job. This focus on employee engagement is essential for the company's ongoing success, as it continues to drive business growth and customer satisfaction. As the market evolves, it is critical for Lee's Market to maintain its focus on employee development to ensure continued success.

## Conclusion

In conclusion, our analysis reveals key trends shaping the grocery retail market. To remain competitive, we must adopt a customer-centric approach, leveraging data-driven insights to inform our business decisions. This report provides a foundation for our future strategy, and we recommend implementing the suggested strategies to stay ahead of the curve.
