# Supplementary material
Source: ML conference proceedings conference paper supplement (https://openreview.net/forum?id=IGYQ4c92e2)
Supplement: supplementary_material [file marketing-cost-report.pdf › drbench/data/tasks/DR0015/files/qa_1755720559/marketing-cost-report.pdf]

# Elexion Automotive Marketing Cost Analysis Q2 2024

## Introduction

As part of our ongoing efforts to optimize marketing strategies and reduce operational costs, this report provides a comprehensive analysis of Elexion Automotive's marketing expenditures in Q2 2024. The purpose of this document is to inform key stakeholders about the company's marketing cost structure and identify areas for potential cost savings. The report will cover various aspects of marketing costs, including advertising, promotional activities, and personnel expenses. By examining these costs, we aim to improve our marketing efficiency and contribute to the company's overall financial performance.

## Marketing Budget Allocation and ROI Analysis

Our marketing team conducted a thorough review of the FY2023 budget allocation in November 2023, focusing on ROI-driven initiatives. This analysis revealed that 42% of our marketing budget was dedicated to event sponsorships, resulting in a 25% increase in brand awareness among the target demographic. The review also highlighted opportunities for cost savings through vendor consolidation. By implementing these changes, we expect to achieve a 10% reduction in marketing expenses by Q1 2025.

## Impact of Electric Vehicle Incentives on Marketing Strategy

The recent extension of federal tax credits for electric vehicle purchases has led to a significant increase in customer inquiries. Our sales team reported a 30% rise in test drive requests between January and March 2024, with 75% of these requests coming from first-time EV buyers. In response, we have adjusted our marketing messaging to emphasize the benefits of EV ownership and the available incentives. This shift in strategy is expected to drive sales growth in the coming quarters.

## Annual Marketing Costs Breakdown by Channel

A recent industry benchmarking study revealed that the average automotive manufacturer allocates 55% of its marketing budget to digital channels. In contrast, our company has traditionally focused on experiential marketing, with 60% of our budget dedicated to event sponsorships and product launches. However, we are exploring opportunities to increase our online presence through targeted social media campaigns and influencer partnerships.

## Cross-Border Compliance and Regulatory Expenses

As part of our expansion into the Canadian market, we have established a dedicated compliance team to ensure adherence to all relevant regulations. In Q3 2023, we incurred \$120,000 in expenses related to regulatory filings and permitting. Our team is working closely with local authorities to streamline the compliance process and minimize future costs. We anticipate a 20% reduction in regulatory expenses by the end of 2024.

## Recommendations for Optimizing Marketing Expenditures

To enhance the efficiency of our marketing operations, we are implementing a new project management tool across all departments. This platform will enable real-time tracking of campaign expenses and facilitate data-driven decision-making. Our marketing team is also developing a comprehensive playbook outlining best practices for budget allocation and vendor management. We expect these initiatives to drive cost savings and improve overall marketing performance.

# Conclusion

In conclusion, this report highlights the key areas of marketing costs for Elexion Automotive in Q2 2024. By analyzing these costs, we can identify opportunities for cost savings and optimize our marketing strategies to improve ROI. The recommendations outlined in this report will help inform future marketing decisions and contribute to the company's financial success. Further analysis and monitoring of marketing costs will be necessary to ensure the company remains competitive in the electric vehicle market.
