# Supplementary material
Source: ML conference proceedings conference paper supplement (https://openreview.net/forum?id=IGYQ4c92e2)
Supplement: supplementary_material [file marketing-performance-report.pdf › drbench/data/tasks/DR0007/files/qa_1755703202/marketing-performance-report.pdf]

# Q1 2024 Marketing Performance Report

## Introduction

As we continue to expand our virtual healthcare services across Canada, it is essential to evaluate our marketing efforts to ensure alignment with business objectives. This report provides an overview of our Q1 2024 marketing performance, highlighting key areas of focus and opportunities for growth. The insights presented in this document will inform our marketing strategy for the remainder of the year. By analyzing our marketing performance, we can optimize our budget allocation and improve overall business outcomes.

## Social Media Engagement and Content Strategy

Our social media team successfully increased engagement rates by 25% between Q3 2022 and Q4 2023 through targeted content campaigns, resulting in an average of 500 new followers per month. The 'Health Tips' series, launched in collaboration with our Clinical Advisory Board, garnered significant attention with a 50% open rate on Twitter. Furthermore, our patient education video series on YouTube has seen a steady 20% month-over-month increase in views. These efforts have solidified our position as a thought leader in virtual healthcare.

## Influencer Partnerships and Campaign ROI Analysis

In 2023, we established partnerships with three prominent health and wellness influencers, reaching a combined audience of 1.5 million individuals. Our influencer-led campaign promoting mental health awareness resulted in a 15% increase in website traffic and a 20% rise in new patient inquiries. The Marketing department is currently conducting an ROI analysis to inform future partnership decisions, with preliminary results indicating a 5% increase in brand awareness. These partnerships have enabled us to tap into niche audiences and expand our market reach.

## Digital Channel Budget Allocation and Utilization

As part of our ongoing efforts to optimize digital channel utilization, the IT department conducted a thorough review of our platform's technical infrastructure in Q2 2023. The analysis revealed opportunities for cost savings through server consolidation and bandwidth optimization, resulting in a 10% reduction in infrastructure costs. These savings have been reallocated to support the development of new features and services, enhancing the overall user experience. Meanwhile, our Development team is exploring ways to leverage AI-powered chatbots to improve patient support and reduce operational costs.

## Conclusion

In conclusion, our Q1 2024 marketing performance has shown promising results, with opportunities for improvement in social media engagement and influencer partnerships. To optimize our marketing budget, we recommend adjusting our digital channel allocation and exploring new content strategies. By implementing these changes, we can enhance our brand presence and drive business growth. The next steps will involve presenting these findings to the marketing team and developing a revised marketing plan for Q2 2024.
