# Supplementary material
Source: ML conference proceedings conference paper supplement (https://openreview.net/forum?id=IGYQ4c92e2)
Supplement: supplementary_material [file MediConn_Compliance_Training_Completion_Report.xlsx]

## Sheet: Compliance_Training_Completion
Quarter	Completion_Rate	Year	Industry_Average	Compliance_Standard
The fiscal quarter in which the compliance training completion rate is recorded (e.g., Q2 2025).	The percentage of employees who completed the compliance training within the specified quarter.	The year in which the compliance training completion data is applicable.	The average compliance training completion rate in the virtual/remote healthcare industry for the specified quarter.	The specific compliance standard or certification that the training pertains to (e.g., ISO 27001).
Q1 2025	82.00%	2025	74.00%	ISO 27001
Q4 2024	79.00%	2024	73.00%	ISO 27001
Q2 2023	78.00%	2023	69.00%	ISO 27001
Q3 2023	74.00%	2023	67.00%	ISO 27001
Q2 2025	88.00%	2025	75.00%	ISO 27001
Q1 2023	75.00%	2023	66.00%	ISO 27001
Q3 2024	81.00%	2024	72.00%	ISO 27001
Q1 2024	80.00%	2024	71.00%	ISO 27001
Q4 2023	76.00%	2023	68.00%	ISO 27001
Q2 2024	77.00%	2024	70.00%	ISO 27001
