# Supplementary material
Source: ML conference proceedings conference paper supplement (https://openreview.net/forum?id=IGYQ4c92e2)
Supplement: supplementary_material [file MediConn_Compliance_Violations_Report_2023.xlsx]

## Sheet: Compliance_Violations_Report
Quarter	Year	Violations_Reported	Impact_on_Insurance
The fiscal quarter for which the compliance violations are reported. This helps track compliance trends over time.	The year corresponding to the reported quarter, allowing for longitudinal analysis of compliance data.	The total number of compliance violations reported during the specified quarter and year. Key metric for assessing compliance risk.	A qualitative assessment of how the reported violations might influence insurance decisions, guiding strategic planning for risk management.
Q2	2024	11	Significant impact on strategic decisions.
Q1	2024	9	Potential impact, plan adjustments might be needed.
Q4	2024	6	Minimal impact, maintain current strategies.
Q3	2025	5	Assesses risks of state compliance, influencing insurance decisions.
Q3	2023	8	Low impact, but monitoring recommended.
Q4	2023	7	Negligible impact, no immediate action required.
Q1	2023	10	Moderate impact on insurance.
Q1	2025	4	Minor impact, routine review suggested.
Q2	2025	3	Very low impact, no changes necessary.
Q2	2023	12	High impact on insurance, requiring immediate attention.
