# Supplementary material
Source: ML conference proceedings conference paper supplement (https://openreview.net/forum?id=IGYQ4c92e2)
Supplement: supplementary_material [file MediConn_CRM_Investment_Analysis_Report.xlsx]

## Sheet: CRM_Investment_Analysis
Expected_ROI	Implementation_Quarter	Financial_Justification	Projected_Benefit_Area	Date_Recorded
The expected return on investment from the new CRM system by a specific quarter, reflecting the financial benefits and improvements in patient engagement.	The specific quarter by which the expected ROI from the CRM system is projected to be realized.	A brief explanation of the financial rationale behind the CRM investment decisions and expected outcomes.	The specific area or aspect of the business expected to benefit from the CRM implementation, such as patient engagement or sales performance.	The date on which the ROI projection and accompanying data were recorded in the system.
30.00%	Q4 2025	Determines financial benefits of CRM investment for patient engagement improvements.	Patient Engagement	2023-10-01
10.00%	Q1 2024	Initial investment expected to improve sales performance.	Sales Performance	2023-01-15
20.00%	Q1 2025	Expected enhancement in data analytics capabilities.	Data Analytics	2023-04-30
18.50%	Q3 2024	Anticipated growth in marketing reach and effectiveness.	Marketing	2023-03-25
22.00%	Q2 2025	Improvements in internal communication projected.	Internal Communication	2023-05-10
15.00%	Q2 2024	Projected increase in customer support efficiency.	Customer Support	2023-02-20
28.00%	Q4 2024	Higher lead generation and conversion rates expected.	Lead Generation	2023-07-21
25.00%	Q3 2025	Increase in patient satisfaction levels forecasted.	Patient Satisfaction	2023-06-13
