# Supplementary material
Source: ML conference proceedings conference paper supplement (https://openreview.net/forum?id=IGYQ4c92e2)
Supplement: supplementary_material [file MediConn_Data_Breach_Financial_Impact_Report.xlsx]

## Sheet: Data Breach Financial Impact
Quarter	Data Breach Cost	Mitigation Strategy	Impact on Compliance
The fiscal quarter and year when the data breach costs were reported. This helps in identifying the time period of the financial impact.	The total financial cost associated with data breaches for the specified quarter. This is crucial for understanding the monetary impact of breaches.	The strategy or measures taken to mitigate the impact of the data breach. This provides context on how the company responds to such incidents.	Indicates whether the data breach had any impact on the company's compliance status. This is important in maintaining regulatory standards.
Q4 2023	$2,500,000.00	Partnered with a cybersecurity firm for monitoring	TRUE
Q3 2023	$1,300,000.00	Updated data backup and recovery plans	FALSE
Q2 2023	$1,050,000.00	Regular vulnerability assessments conducted	TRUE
Q4 2024	$3,000,000.00	Enhanced security protocols and employee training	FALSE
Q1 2023	$950,000.00	Launched employee awareness campaigns	FALSE
Q1 2024	$1,200,000.00	Implemented new encryption standards	FALSE
Q3 2024	$1,800,000.00	Upgraded firewall and intrusion detection systems	FALSE
Q2 2024	$1,500,000.00	Conducted a comprehensive security audit	TRUE
