# Supplementary material
Source: ML conference proceedings conference paper supplement (https://openreview.net/forum?id=IGYQ4c92e2)
Supplement: supplementary_material [file MediConn_Employee_Onboarding_Training_Schedule.xlsx]

## Sheet: Employee_Onboarding_Training_Me
Quarter	Onboarding_Time_Spent_on_Training	Total_Onboarding_Hours	Number_of_New_Hires	Training_Hours_Per_Hire
The fiscal quarter in which the data was collected, e.g., Q1 2025, Q2 2025. This helps in tracking changes over time.	The percentage of total employee onboarding time that is dedicated to training activities. This metric is crucial for understanding the efficiency and focus of the onboarding process.	The total number of hours spent on onboarding new employees during the quarter. This provides context for the percentage of time spent on training.	The number of new employees who started the onboarding process in the specified quarter. This helps in understanding the scale of onboarding activities.	The average number of hours spent on training per new hire. This metric helps in assessing the intensity and depth of training provided.
Q4 2024	30.00%	150	40	1.13
Q1 2024	28.00%	140	35	1.12
Q1 2023	33.00%	155	42	1.22
Q3 2023	31.00%	175	45	1.21
Q1 2025	35.00%	180	45	1.4
Q2 2023	26.00%	145	38	0.99
Q4 2023	29.00%	130	30	1.26
Q3 2024	25.00%	160	50	0.8
Q2 2025	44.00%	200	50	1.76
Q2 2024	32.00%	170	55	0.99
