# Supplementary material
Source: ML conference proceedings conference paper supplement (https://openreview.net/forum?id=IGYQ4c92e2)
Supplement: supplementary_material [file MediConn_Employee_Satisfaction_Analysis.xlsx]

## Sheet: Employee_Satisfaction_Insights
Quarter	Department	Satisfaction_Score	Sample_Size	Key_Drivers
The fiscal quarter and year for which the employee satisfaction data is reported, e.g., Q2 2025.	The specific department within MediConn Solutions being assessed for job satisfaction, in this case, customer-facing staff.	The average job satisfaction score reported by employees within the specified department and quarter. This is expressed as a percentage.	The number of employees surveyed within the specified department and quarter.	Identified key drivers of employee satisfaction. This information can inform marketing and HR strategies.
Q1 2023	Customer-Facing	72.00%	105	Increasing support for professional development.
Q3 2023	Customer-Facing	75.00%	115	Enhancing job security and stability.
Q2 2025	Customer-Facing	85.00%	150	Identifying key drivers of employee satisfaction to inform our content marketing and human resources strategies.
Q1 2025	Customer-Facing	78.00%	145	Improving communication and support from management.
Q4 2024	Customer-Facing	80.00%	140	Enhancing work-life balance and career development opportunities.
Q2 2023	Customer-Facing	73.00%	110	Providing clear pathways for career progression.
Q3 2024	Customer-Facing	76.00%	135	Increasing recognition and reward for achievements.
Q1 2024	Customer-Facing	77.00%	125	Fostering a more inclusive work environment.
Q4 2023	Customer-Facing	79.00%	120	Improving team collaboration and cohesion.
Q2 2024	Customer-Facing	74.00%	130	Providing more training and development.
