# Supplementary material
Source: ML conference proceedings conference paper supplement (https://openreview.net/forum?id=IGYQ4c92e2)
Supplement: supplementary_material [file MediConn_Employee_Satisfaction_Metrics.xlsx]

## Sheet: Employee Satisfaction Metrics
Quarter	Year	Satisfaction Rate	Employee Count	Comments
The fiscal quarter during which the employee satisfaction was measured. This is crucial for time-trend analysis and understanding seasonal variations.	The fiscal year during which the employee satisfaction was measured. Used to track annual trends and improvements.	The percentage of employees satisfied with their job during the specified quarter. A key indicator of internal morale and company culture.	The total number of employees surveyed for satisfaction during the specified quarter. Provides context for the satisfaction rate.	Additional qualitative insights or notes from the employee satisfaction survey. Useful for understanding the reasons behind satisfaction levels.
Q2	2023	0.78	142	Increased workload due to project deadlines.
Q2	2024	0.82	150	Employee satisfaction is unrelated to CRM solution trends or patient engagement.
Q1	2023	0.75	145	Positive feedback on new work-from-home policy.
Q1	2024	0.79	155	Introduction of flexible working hours appreciated.
Q4	2024	0.83	152	New leadership seen as a positive change.
Q3	2023	0.76	148	Concerns about job security during reorganization.
Q3	2024	0.81	147	Team-building activities boosted team spirit.
Q4	2023	0.8	150	Year-end bonuses improved morale.
