# Supplementary material
Source: ML conference proceedings conference paper supplement (https://openreview.net/forum?id=IGYQ4c92e2)
Supplement: supplementary_material [file MediConn_Employee_Satisfaction_Survey_Results.xlsx]

## Sheet: Employee_Satisfaction_Scores
Department	Score_Percentage	Reporting_Period	Year
The department or team within the company for which the employee satisfaction score is being reported. This helps to categorize the satisfaction metrics by different organizational units.	The employee satisfaction score expressed as a percentage. This column provides insight into the level of satisfaction among employees in the specified department.	The specific quarter or time period during which the satisfaction survey was conducted. This helps in tracking changes in satisfaction over different periods.	The calendar year in which the employee satisfaction survey was conducted. This is used for chronological tracking and analysis.
IT	0.78	Q3	2025
Operations	0.75	Q2	2025
Facilities	0.92	Q3	2025
Sales	0.8	Q3	2025
Finance	0.88	Q2	2025
Marketing	0.85	Q3	2025
Engineering	0.87	Q3	2024
Customer Service	0.79	Q1	2025
HR	0.82	Q3	2025
Legal	0.83	Q3	2025
