# Supplementary material
Source: ML conference proceedings conference paper supplement (https://openreview.net/forum?id=IGYQ4c92e2)
Supplement: supplementary_material [file MediConn_Employee_Training_Completion_Report.xlsx]

## Sheet: Employee_Training_Completion_Ra
Quarter	Training_Completion_Rate	Participants	Training_Impact
The fiscal quarter during which the training was conducted, e.g., Q1 2024.	The percentage of employees who completed the training program during the specified quarter.	The number of employees who participated in the training program.	A brief description of how the training outcomes affect company operations, if applicable.
Q1 2024	80.00%	250	Improved customer service satisfaction.
Q1 2022	60.00%	150	Improved time management.
Q4 2022	72.00%	190	Boosted leadership capabilities.
Q2 2022	68.00%	170	Enhanced customer interaction skills.
Q3 2023	82.00%	270	Increased workplace safety awareness.
Q4 2023	78.00%	230	Enhanced project management skills.
Q1 2023	70.00%	180	Streamlined internal processes.
Q2 2023	75.00%	200	Better teamwork and communication.
Q3 2022	65.00%	160	Heightened technical skills.
Q2 2024	85.00%	300	Training metrics do not impact IT service desk workload or response times.
