# Supplementary material
Source: ML conference proceedings conference paper supplement (https://openreview.net/forum?id=IGYQ4c92e2)
Supplement: supplementary_material [file MediConn_Employee_Turnover_Analysis_Report.xlsx]

## Sheet: Employee_Turnover_Analysis
Quarter	Year	Turnover_Rate	Total_Employees	New_Hires
The fiscal quarter of the year in which the employee turnover rate is measured. This allows for analysis of trends over different periods.	The year corresponding to the reported turnover rate. This helps in tracking the changes in employee retention over time.	The percentage of employees who left the company during the specified quarter. This is a key metric for understanding employee retention and workforce stability.	The total number of employees at the beginning of the quarter. This provides context for the turnover rate and helps in understanding the scale of turnover.	The number of new employees hired during the quarter. This helps in assessing the company's growth or replacement hiring strategies.
Q4	2023	8.00%	420	38
Q2	2023	6.50%	440	35
Q4	2025	8.50%	530	60
Q3	2025	9.00%	520	55
Q1	2025	10.00%	500	50
Q3	2023	7.50%	430	40
Q3	2024	9.50%	470	45
Q2	2025	9.50%	510	48
Q2	2024	8.00%	480	40
Q1	2023	5.00%	450	25
Q4	2024	7.00%	460	30
