# Supplementary material
Source: ML conference proceedings conference paper supplement (https://openreview.net/forum?id=IGYQ4c92e2)
Supplement: supplementary_material [file MediConn_Employee_Turnover_Analysis_Summary.xlsx]

## Sheet: Employee_Turnover_Statistics
Quarter	Employee_Turnover_Rate	Total_Employees_Start	Total_Employees_End	Voluntary_Exits	Involuntary_Exits	New_Hires
The financial quarter and year for which the employee turnover rate is reported (e.g., Q3 2025).	The percentage of employees who left the company during the specified quarter.	The total number of employees at the beginning of the quarter.	The total number of employees at the end of the quarter.	The number of employees who left the company voluntarily during the quarter.	The number of employees who left the company involuntarily during the quarter.	The number of new employees hired during the quarter.
Q3 2025	11%	1000	890	80	30	0
Q2 2023	7%	950	880	60	10	0
Q1 2024	3%	1020	990	20	10	0
Q3 2023	5%	980	930	40	10	0
Q3 2024	8%	1100	1010	70	20	0
Q1 2023	4%	920	890	30	10	0
Q4 2024	7%	1080	1000	60	20	0
Q2 2024	4%	1050	1010	30	10	0
Q4 2023	6%	1000	940	50	10	0
Q1 2025	5%	1200	1140	40	20	0
Q2 2025	6%	1150	1080	50	20	0
