# Supplementary material
Source: ML conference proceedings conference paper supplement (https://openreview.net/forum?id=IGYQ4c92e2)
Supplement: supplementary_material [file MediConn_Facility_Energy_Costs_Q2_2024.xlsx]

## Sheet: Facility_Energy_Costs_Q2_2024
facility_name	total_energy_cost	average_cost_per_kWh	energy_consumption_kWh	reporting_period
The name of the facility for which the energy costs are being tracked.	The total energy cost incurred by the facility for the specified period, given in Canadian dollars.	The average cost per kilowatt-hour (kWh) of energy consumed by the facility.	The total energy consumption of the facility in kilowatt-hours (kWh) during the specified period.	The time period for which the energy costs and consumption are reported, e.g., 'Q2 2024'.
Data Center	9500	0.095	100000	Q1 2023
Research Lab	7200	0.072	100000	Q3 2023
Distribution Center	8500	0.085	100000	Q4 2023
Retail Store	6000	0.06	100000	Q3 2023
Secondary Facility	8000	0.08	100000	Q1 2024
Manufacturing Plant	11000	0.11	100000	Q2 2023
Main Facility	12000	0.1	120000	Q2 2024
Warehouse A	5000	0.09	55555.6	Q1 2024
Office Building	7000	0.07	100000	Q4 2023
Warehouse B	7500	0.075	100000	Q2 2023
