# Supplementary material
Source: ML conference proceedings conference paper supplement (https://openreview.net/forum?id=IGYQ4c92e2)
Supplement: supplementary_material [file MediConn_HR_Training_Impact_Metrics_Report.xlsx]

## Sheet: HR_Training_Impact_Metrics
Quarter	Training_Sessions_Conducted	Employee_Participation	Compliance_Focus	Training_Impact_Score
The fiscal quarter in which the HR training sessions were conducted, e.g., Q2 2025.	The total number of HR training sessions conducted in the specified quarter.	The number of employees who participated in the HR training sessions during the specified quarter.	The specific compliance topics covered during the HR training sessions, such as data protection regulations or security protocols.	A score evaluating the effectiveness of the HR training sessions in terms of employee readiness and compliance understanding, ranging from 0 to 10.
Q3 2026	8	135	Harassment Policies	9.1
Q4 2024	6	110	Workplace Safety	8.2
Q1 2024	5	100	General Data Protection	8
Q2 2026	5	105	Financial Regulations	8.1
Q2 2025	10	150	Data Breach Regulations	9.5
Q3 2025	9	140	Data Privacy	9.2
Q1 2025	8	130	Ethical Compliance	9
Q1 2026	7	125	Environmental Compliance	8.9
Q4 2025	6	115	Health Regulations	8.7
Q3 2024	7	120	Cybersecurity Protocols	8.5
