# Supplementary material
Source: ML conference proceedings conference paper supplement (https://openreview.net/forum?id=IGYQ4c92e2)
Supplement: supplementary_material [file MediConn_Infra_Costs_Analysis_Report.xlsx]

## Sheet: IT_Infrastructure_Costs_Analysi
Quarter	Year	IT_Infrastructure_Costs	Cost_Impact_Analysis
The fiscal quarter for which the IT infrastructure costs are reported. This helps in tracking costs over time.	The fiscal year associated with the reported IT infrastructure costs. Useful for annual comparison.	The total costs incurred for IT infrastructure in the specified quarter and year. This includes hardware, software, and maintenance expenses.	A qualitative analysis of how the IT infrastructure costs relate to other business factors, such as compliance, security, and overall budget.
Q1	2022	1100000	Costs remained stable with limited new investments.
Q1	2023	1250000	Costs increased due to new compliance requirements.
Q4	2023	1450000	Additional costs for end-of-year system upgrades.
Q2	2024	1550000	Costs impacted by hardware refresh cycle.
Q1	2024	1500000	Increased costs from cloud infrastructure expansion.
Q2	2022	1150000	Minor increases due to software updates.
Q4	2022	1350000	End-of-year budget adjustments increased costs.
Q3	2024	1800000	IT costs do not directly relate to third-party data breach impacts.
Q2	2023	1300000	Higher costs from upgrading security measures.
Q3	2023	1400000	Increased software licensing fees.
