# Supplementary material
Source: ML conference proceedings conference paper supplement (https://openreview.net/forum?id=IGYQ4c92e2)
Supplement: supplementary_material [file MediConn_Insurance_Acceptance_Analysis_Report.xlsx]

## Sheet: Insurance Acceptance Analysis
Quarter	Insurance_Acceptance_Rate	Impact_Analysis
The fiscal quarter for which the data is reported, e.g., 'Q3 2025'.	The percentage of healthcare providers who accept insurance within the specified quarter.	A brief qualitative assessment or summary of the potential impact of insurance acceptance on provider decisions and company strategy.
Q2 2025	58.00%	Slight rise in acceptance, potentially driven by new policy incentives.
Q3 2025	60.00%	Helps gauge insurance impact on provider decisions, addressing the DR Question.
Q2 2024	48.00%	Incremental growth in acceptance rate, suggesting gradual adaptation by providers.
Q3 2024	50.00%	Half of the providers now accept insurance, marking a significant milestone.
Q4 2024	52.00%	Growth in insurance acceptance slowed, possibly due to regulatory changes.
Q1 2025	55.00%	Steady increase in acceptance rates, reflecting positive trends in provider insurance relations.
Q1 2024	46.00%	Initial signs of improvement in acceptance rates, linked to increased provider education.
