# Supplementary material
Source: ML conference proceedings conference paper supplement (https://openreview.net/forum?id=IGYQ4c92e2)
Supplement: supplementary_material [file MediConn_IT_Quarterly_Expenses_Report.xlsx]

## Sheet: Quarterly IT Expenses
Quarter	IT_Maintenance_Cost	Impact_on_Services
The fiscal quarter for which the IT maintenance cost is reported, e.g., 'Q1 2024'.	Total IT maintenance costs incurred during the specified quarter. This includes expenses related to maintaining and updating IT infrastructure, crucial for supporting MediConn Solutions' virtual healthcare services.	A brief statement on how IT maintenance costs affect the effectiveness and efficiency of MediConn Solutions' services, emphasizing the company's focus on maintaining service quality without direct impact on CRM solution effectiveness or patient engagement.
Q2 2022	$190,000.00	Ensured robust infrastructure support.
Q4 2023	$250,000.00	No significant impact on service quality.
Q4 2022	$200,000.00	Contributed to maintaining high service standards.
Q1 2022	$185,000.00	Enhanced system performance without affecting user experience.
Q3 2022	$195,000.00	Focused on backend improvements with no user impact.
Q3 2023	$230,000.00	Maintained system reliability with no effect on user engagement.
Q4 2021	$180,000.00	Continued investment in IT stability and efficiency.
Q1 2023	$210,000.00	Supported infrastructure stability, enhancing service delivery.
Q2 2023	$220,000.00	Ensured seamless virtual healthcare services.
Q1 2024	$300,000.00	IT maintenance costs don't impact CRM solution effectiveness or patient engagement.
