# Supplementary material
Source: ML conference proceedings conference paper supplement (https://openreview.net/forum?id=IGYQ4c92e2)
Supplement: supplementary_material [file MediConn_IT_Service_Management_Insights_Report.xlsx]

## Sheet: IT_Service_Management_Insights
Quarter	Routine_Tickets_Percentage	AI_Optimization_Justification
The fiscal quarter for which the data is reported, formatted as Q1, Q2, Q3, or Q4 followed by the year.	The percentage of total IT service tickets classified as routine for the specified quarter. This metric helps in identifying the proportion of tasks that can potentially be automated or streamlined.	A detailed explanation of how identifying routine tasks can focus AI efforts to reduce workload and improve efficiency in IT service management.
Q2 2025	31.00%	Routine task identification aids in targeted AI implementation.
Q1 2025	29.00%	Lowering routine tickets can improve service delivery standards.
Q1 2024	30.00%	Routine tasks can be automated, freeing up resources for complex tasks.
Q4 2024	33.00%	AI optimization in routine tasks can lead to significant cost savings.
Q3 2025	40.00%	Identifying routine tasks helps focus AI efforts to reduce workload.
Q2 2024	32.00%	Streamlining routine tickets can enhance overall service efficiency.
Q3 2024	35.00%	Reducing routine task load can enable quicker response times.
