# Supplementary material
Source: ML conference proceedings conference paper supplement (https://openreview.net/forum?id=IGYQ4c92e2)
Supplement: supplementary_material [file MediConn_IT_Support_Costs_Quarterly_Report.xlsx]

## Sheet: Quarterly_IT_Support_Costs
Quarter	IT_Support_Cost	Year	Average_Cost_Per_Employee
The fiscal quarter for which the IT support costs are reported, e.g., Q1 2025.	The total IT support costs incurred in the specified quarter, relevant for analyzing operational expenses.	The year corresponding to the fiscal quarter, useful for longitudinal analyses.	The average IT support cost per employee for the quarter, providing insight into cost efficiency.
Q2 2023	86000	2023	430
Q1 2023	84000	2023	420
Q4 2023	88000	2023	440
Q1 2025	120000	2025	600
Q2 2024	95000	2024	475
Q4 2024	85000	2024	425
Q3 2023	87000	2023	435
Q3 2024	90000	2024	450
Q1 2024	92000	2024	460
