# Supplementary material
Source: ML conference proceedings conference paper supplement (https://openreview.net/forum?id=IGYQ4c92e2)
Supplement: supplementary_material [file MediConn_IT_Training_Budget_Analysis_2023.xlsx]

## Sheet: IT_Training_Budget_Analysis
Quarter	Year	IT_Training_Budget	Impact_on_Security	Compliance_Certifications	Market_Position_Impact
The fiscal quarter in which the budget was allocated. This helps track the budget allocation over different periods.	The fiscal year for the budget allocation. This is crucial for year-over-year comparisons of budget trends.	The total budget allocated for IT training in a given quarter. It is important for evaluating investment in employee skill development.	Indicates whether the IT training budget was influenced by third-party data breach impacts. Useful for understanding budget adjustments related to security concerns.	List of compliance certifications held by the company during the budget period. Provides context on regulatory influences on budgeting.	Describes any impact on market position or competitive advantage due to IT training investments. Important for strategic planning.
Q1	2024	250000	FALSE	ISO 27001, GDPR	Increased employee satisfaction
Q3	2023	180000	TRUE	ISO 27001, GDPR, SOC 2	Slight improvement in market perception
Q1	2023	150000	TRUE	ISO 27001	Maintained market position
Q4	2023	220000	TRUE	ISO 27001, GDPR	Stabilized market presence
Q3	2024	300000	FALSE	ISO 27001, GDPR	Enhanced competitive advantage
Q2	2023	200000	FALSE	ISO 27001, GDPR	Improved compliance ranking
Q2	2024	275000	FALSE	ISO 27001, GDPR, SOC 2	Improved training efficiency
