# Supplementary material
Source: ML conference proceedings conference paper supplement (https://openreview.net/forum?id=IGYQ4c92e2)
Supplement: supplementary_material [file MediConn_Network_Uptime_IT_Service_Report.xlsx]

## Sheet: Network Uptime and IT Service I
Quarter	Network Uptime	IT Service Desk Impact	Compliance Status
The financial quarter being analyzed, e.g., Q2 2024.	The percentage of time the network was operational without interruptions during the specified quarter.	A qualitative assessment of how network uptime affected the IT service desk workload and response times.	Indicates whether the network operations were in compliance with relevant certifications and regulations during the quarter.
Q1 2024	0.975	Slight increase in service desk calls due to minor network disruptions.	TRUE
Q4 2023	0.982	Stable network performance resulted in normal service desk operations.	TRUE
Q1 2023	0.97	Minimal impact on service desk with steady network performance.	TRUE
Q2 2024	0.998	Network uptime doesn't directly affect IT service desk workload or response times.	TRUE
Q2 2022	0.945	Service desk operations were affected by network downtime.	FALSE
Q2 2023	0.965	Service desk experienced higher call volume due to network instability.	FALSE
Q3 2022	0.955	Network performance issues led to greater service desk involvement.	FALSE
Q4 2022	0.96	Service desk handled increased queries because of network interruptions.	FALSE
Q1 2022	0.98	Network was stable, resulting in a smooth service desk operation.	TRUE
Q3 2023	0.95	Increased service desk workload due to frequent network outages.	FALSE
