# Supplementary material
Source: ML conference proceedings conference paper supplement (https://openreview.net/forum?id=IGYQ4c92e2)
Supplement: supplementary_material [file MediConn_Online_Consultation_Booking_Insights.xlsx]

## Sheet: Online_Consultation_Booking_Ins
Quarter	Mobile_App_Booking_Percentage	Total_Consultations	Mobile_App_Bookings	Desktop_Bookings	Marketing_Strategy_Notes
The fiscal quarter during which the data was collected, e.g., Q3 2025.	The percentage of online consultations booked through the mobile app during the specified quarter.	The total number of online consultations conducted during the specified quarter.	The absolute number of consultations booked through the mobile app during the specified quarter.	The number of consultations booked through desktop or other non-mobile platforms during the specified quarter.	Notes or observations related to marketing strategies or trends observed during the specified quarter.
Q4 2023	18.00%	950	171	779	Initial launch of mobile app.
Q3 2024	25.00%	1100	275	825	Initiated email campaigns targeting desktop users.
Q3 2025	35.00%	1500	525	975	Understanding patient behavior and preferences to optimize our digital presence and content marketing strategy.
Q3 2023	15.00%	900	135	765	Focus on desktop marketing.
Q2 2024	22.00%	1050	231	819	Improved desktop user interface.
Q1 2025	30.00%	1300	390	910	Increased social media engagement.
Q2 2025	32.00%	1400	448	952	Launched new mobile app features.
Q1 2024	20.00%	1000	200	800	General increase in desktop bookings due to promotions.
Q4 2024	28.00%	1200	336	864	Focused on desktop advertising.
