# Supplementary material
Source: ML conference proceedings conference paper supplement (https://openreview.net/forum?id=IGYQ4c92e2)
Supplement: supplementary_material [file MediConn_Patient_Satisfaction_Insights_Report.xlsx]

## Sheet: Patient_Satisfaction_Insights
Quarter	Patient_Satisfaction_Rate	Data_Breach_Impact	Compliance_Status
The fiscal quarter and year under consideration, e.g., 'Q1 2025'.	The percentage of patients satisfied with the services provided during the specified quarter.	Indicates whether a data breach had an impact on patient satisfaction during the specified quarter.	The status of compliance certifications during the specified quarter, reflecting adherence to industry standards.
Q4 2024	75.00%	FALSE	Non-Compliant
Q3 2023	77.00%	FALSE	Compliant
Q4 2023	80.00%	TRUE	Compliant
Q3 2024	78.00%	TRUE	Compliant
Q2 2023	79.00%	TRUE	Non-Compliant
Q1 2025	89.00%	FALSE	Compliant
Q2 2024	82.00%	FALSE	Compliant
Q1 2024	85.00%	FALSE	Non-Compliant
