# Supplementary material
Source: ML conference proceedings conference paper supplement (https://openreview.net/forum?id=IGYQ4c92e2)
Supplement: supplementary_material [file MediConn_Quarterly_Compliance_Costs_Report.xlsx]

## Sheet: Quarterly Compliance Costs
Quarter	Compliance_Certification	Audit_Cost	Cost_Change_Percentage	Notes
The fiscal quarter for which the compliance audit costs are reported, e.g., Q3 2024.	The specific compliance certification or regulation associated with the audit costs, e.g., PIPEDA, ISO 27001.	The total cost incurred for the compliance audit in the specified quarter.	The percentage change in audit costs compared to the previous quarter.	Additional notes or comments about the compliance audit or cost changes, e.g., reasons for cost increase.
Q1 2024	PIPEDA	$120,000.00	2.50%	Increase due to additional requirements.
Q3 2024	ISO 27001	$150,000.00	5.00%	Compliance costs are unrelated to IT service desk workload and response times.
Q2 2022	PIPEDA	$103,000.00	-0.50%	Slight cost reduction from efficient auditing process.
Q2 2023	PIPEDA	$112,000.00	1.80%	Minor adjustments in audit procedures.
Q2 2024	ISO 27001	$142,857.14	3.00%	Increase due to scope expansion.
Q3 2023	HIPAA	$110,000.00	0.00%	No significant changes.
Q1 2023	ISO 27001	$110,000.00	1.00%	Slight increase from additional documentation efforts.
Q4 2023	GDPR	$115,000.00	-1.00%	Decrease due to completed training.
Q4 2022	GDPR	$107,000.00	2.00%	Increase due to new data processing agreements.
Q3 2022	HIPAA	$105,000.00	0.00%	Stable costs compared to the previous quarter.
