# Supplementary material
Source: ML conference proceedings conference paper supplement (https://openreview.net/forum?id=IGYQ4c92e2)
Supplement: supplementary_material [file MediConn_Quarterly_Facility_Costs_Report.xlsx]

## Sheet: Quarterly_Facility_Costs
Quarter	Facility_Costs	Annual_Revenue_Category	Compliance_Certifications	Headquarters_Location
The fiscal quarter for which the facility costs are reported, e.g., 'Q3 2025'.	Total facility costs incurred during the specified quarter. This includes expenses related to physical infrastructure, utilities, and maintenance.	The annual revenue range of the company during the reporting period, providing context to the cost data.	List of compliance certifications held by the company, indicating adherence to regulatory standards during the reporting period.	The location of the company's headquarters, providing geographic context relevant to the facility costs.
Q1 2024	110000	$250K - $500K	ISO 14001	Boston, USA
Q2 2024	95000	$250K - $500K	ISO 9001	Seattle, USA
Q1 2025	200000	$500K - $1M	ISO 9001	Chicago, USA
Q3 2024	120000	$500K - $1M	ISO 9001	San Francisco, USA
Q4 2023	80000	$250K - $500K	ISO 9001	Miami, USA
Q2 2025	150000	$500K - $1M	ISO 9001	Los Angeles, USA
Q4 2024	175000	$500K - $1M	ISO 9001, ISO 14001	Houston, USA
Q3 2025	350000	$1M - $5M	ISO 9001, ISO 14001	New York, USA
Q3 2023	90000	$250K - $500K	ISO 14001	Denver, USA
