# Supplementary material
Source: ML conference proceedings conference paper supplement (https://openreview.net/forum?id=IGYQ4c92e2)
Supplement: supplementary_material [file MediConn_Quarterly_Financial_Insights.xlsx]

## Sheet: Quarterly_Financial_Insights
Quarter	Category	Amount	Justification
The fiscal quarter for which the financial data is reported (e.g., Q3 2025).	The category of the financial metric being reported, such as 'IT Infrastructure Costs'.	The financial amount associated with the category for the specified quarter, expressed in millions of dollars.	A brief explanation of how the financial metric relates to business decisions, especially in contexts like compliance and insurance.
Q3 2024	Marketing Expenses	14:24:00	Increased marketing efforts were made to capture market share.
Q4 2024	Insurance Premiums	07:12:00	Insurance premiums were reduced due to improved risk assessment.
Q2 2024	Compliance Costs	09:36:00	Compliance efforts were enhanced to meet new regulations.
Q2 2025	IT Infrastructure Costs	14:24:00	IT costs were monitored to ensure efficient resource allocation.
Q3 2025	IT Infrastructure Costs	1900-01-01 04:48:00	IT costs are irrelevant to insurance and compliance decisions.
Q2 2025	Research and Development	21:36:00	R&D spending was primarily on new product development.
Q1 2025	IT Infrastructure Costs	12:00:00	IT costs were stable and aligned with budget expectations.
Q1 2024	IT Infrastructure Costs	16:48:00	IT costs were managed to optimize operational efficiency.
Q1 2025	Marketing Expenses	19:12:00	Marketing expenses were focused on increasing brand awareness.
