# Supplementary material
Source: ML conference proceedings conference paper supplement (https://openreview.net/forum?id=IGYQ4c92e2)
Supplement: supplementary_material [file MediConn_Quarterly_Financial_Overview.xlsx]

## Sheet: Quarterly Financial Overview
Quarter	Training_Budget	Budget_Change_Percentage	Revenue_Range	Compliance_Impact
The fiscal quarter for which the financial data is reported, e.g., Q2 2025.	The total budget allocated for training in the specified quarter. This includes funds allocated for employee development and training programs.	The percentage change in the training budget compared to the previous quarter. This helps in understanding financial trends and budget adjustments.	The range of the company's annual revenue. This provides context for financial allocations and budget planning.	Indicates whether the training budget changes have any compliance-related impact. Given the company's strong compliance framework, it's crucial to monitor budget changes for potential compliance implications.
Q2 2023	$303,000.00	1.00%	$5M - $10M	FALSE
Q1 2024	$299,000.00	0.50%	$10M - $50M	FALSE
Q3 2023	$297,000.00	-2.00%	$5M - $10M	TRUE
Q2 2024	$304,000.00	1.50%	$10M - $50M	FALSE
Q4 2023	$297,000.00	0.00%	$5M - $10M	FALSE
Q1 2025	$333,333.00	3.00%	$10M - $50M	FALSE
Q4 2024	$323,456.00	4.50%	$10M - $50M	FALSE
Q2 2025	$350,000.00	5.00%	$10M - $50M	FALSE
Q3 2024	$310,000.00	2.00%	$10M - $50M	TRUE
Q1 2023	$300,000.00	0.00%	$5M - $10M	FALSE
