# Supplementary material
Source: ML conference proceedings conference paper supplement (https://openreview.net/forum?id=IGYQ4c92e2)
Supplement: supplementary_material [file MediConn_Quarterly_Financial_Overview.xlsx]

## Sheet: Quarterly_Financial_Overview
Quarter	Total_Marketing_Costs	Revenue	Compliance_Costs	Net_Profit	Employee_Count
The fiscal quarter to which the financial data pertains, e.g., 'Q1 2024'.	The total amount spent on marketing activities during the specified quarter. This reflects the company's investment in brand promotion and customer acquisition.	The total revenue generated by the company in the specified quarter, indicating business growth and financial health.	Expenses related to maintaining compliance with industry regulations and certifications, crucial for operating in the healthcare sector.	The net profit achieved after deducting all expenses from the total revenue in the specified quarter. This is a key indicator of financial performance.	The total number of employees working in the company during the specified quarter, reflecting potential operational scale and capacity.
Q3 2022	390000	6300000	130000	2400000	430
Q1 2024	500000	7500000	200000	3000000	500
Q1 2023	430000	6800000	170000	2600000	450
Q2 2023	420000	6700000	160000	2700000	460
Q4 2022	410000	6900000	140000	2750000	440
Q2 2022	385000	6200000	120000	2350000	420
Q1 2022	380000	6100000	125000	2300000	410
Q3 2023	400000	6500000	180000	2500000	470
Q4 2023	450000	7000000	150000	2800000	480
