# Supplementary material
Source: ML conference proceedings conference paper supplement (https://openreview.net/forum?id=IGYQ4c92e2)
Supplement: supplementary_material [file MediConn_Quarterly_Hiring_Stats_Report.xlsx]

## Sheet: Quarterly_Hiring_Statistics
Quarter	New_Hires	Total_Employee_Count	Hiring_Growth_Rate	Notes
The specific quarter for which the hiring data is being reported, e.g., Q1 2024.	The number of new employees hired during the specified quarter.	The total number of employees in the company at the end of the specified quarter.	The percentage increase in the number of employees compared to the previous quarter.	Additional comments or notes related to the hiring statistics for the specified quarter.
Q3 2023	20	475	4.40%	Steady growth observed.
Q1 2022	5	402	1.26%	Focus on retention over hiring.
Q1 2024	30	530	6.00%	New hiring data does not relate to insurance acceptance factors.
Q3 2022	12	422	2.93%	Increased hiring for new projects.
Q2 2023	15	455	3.41%	Slight increase in hiring.
Q4 2022	8	430	1.90%	Holiday season impact on hiring.
Q4 2023	25	500	5.26%
Q2 2022	8	410	1.99%	Minimal hiring due to budget constraints.
Q4 2021	7	397	1.45%	Year-end hiring adjustments.
Q1 2023	10	440	2.33%	New training programs initiated.
