# Supplementary material
Source: ML conference proceedings conference paper supplement (https://openreview.net/forum?id=IGYQ4c92e2)
Supplement: supplementary_material [file MediConn_Quarterly_IT_Budget_2023_Allocations.xlsx]

## Sheet: Quarterly_IT_Budget_Allocations
Quarter	Budget_Allocation	Allocation_Justification	Compliance_Certification_Impact
The fiscal quarter for the budget allocation, e.g., Q1 2024.	The total budget allocated for IT infrastructure upgrades during the specified quarter. This indicates the financial investment planned for technology enhancements.	A brief description of the reasoning behind the budget allocation, highlighting strategic priorities or needs addressed by this investment.	Indicates whether the budget allocation supports compliance with certifications such as PIPEDA or ISO 27001, which are critical for maintaining secure and compliant telehealth operations.
Q4 2023	150000	Budget allocated for upgrading cloud storage capabilities to enhance data retrieval speeds.	TRUE
Q2 2023	200000	Expansion of server capacities to support increased telehealth service demands.	TRUE
Q3 2023	180000	Investment in cybersecurity tools to strengthen network defense against potential breaches.	TRUE
Q3 2022	140000	Implementation of new telehealth software solutions to improve user experience.	FALSE
Q1 2024	220000	IT infrastructure budget allocation does not address the critical elements of a digital presence for a telehealth provider	FALSE
Q4 2022	160000	Enhancement of data analytics capabilities for better patient data management.	TRUE
Q1 2023	175000	Upgrade of communication systems to improve reliability and efficiency in telehealth operations.	FALSE
