# Supplementary material
Source: ML conference proceedings conference paper supplement (https://openreview.net/forum?id=IGYQ4c92e2)
Supplement: supplementary_material [file MediConn_Quarterly_Training_Hours_Report.xlsx]

## Sheet: Quarterly_Training_Hours
Quarter	Total_Training_Hours	Impact_on_Business_Decisions
The fiscal quarter and year for which training hours are reported, e.g., 'Q4 2024'.	The total number of training hours accumulated by employees during the specified quarter.	A brief note on how the training metrics influence or don't influence business decisions, particularly in areas like compliance and insurance.
Q3 2023	900	Training hours supported team-building efforts.
Q2 2023	1300	No significant influence on business decisions detected.
Q1 2023	1000	Minimal impact on insurance premiums noted.
Q1 2025	1400	Future training programs to focus more on compliance needs.
Q2 2025	1600	Training contributed to improved employee productivity.
Q2 2024	1500	Increased training hours correlated with better safety compliance.
Q3 2024	1800	Training enhanced operational efficiency, but no direct impact on compliance.
Q4 2024	2500	General training metrics don't impact insurance and compliance decisions.
Q4 2023	1100	Training hours increased, but no noticeable impact on compliance.
Q1 2024	1200	Training hours helped improve compliance with new regulations.
