# Supplementary material
Source: ML conference proceedings conference paper supplement (https://openreview.net/forum?id=IGYQ4c92e2)
Supplement: supplementary_material [file MediConn_Solutions_AI_Resolved_Tickets_Report.xlsx]

## Sheet: AI_Resolved_Tickets_Overview
Quarter	AI_Resolved_Tickets	Total_Tickets_Resolved	AI_Resolution_Percentage	Average_Response_Time	Average_Resolution_Time
The fiscal quarter and year for which the data is reported, e.g., 'Q3 2025'.	The number of support tickets resolved by AI within the specified quarter.	The total number of support tickets resolved in the specified quarter, including those resolved by AI and human agents.	The percentage of total tickets resolved by AI in the specified quarter.	The average response time in hours for tickets resolved by AI in the specified quarter.	The average resolution time in hours for tickets resolved by AI in the specified quarter.
Q4 2023	150	750	20.00%	2	4.5
Q1 2025	400	1000	40.00%	1.7	3.5
Q3 2024	300	900	33.33%	1.8	3.8
Q2 2024	250	850	29.41%	1.85	4
Q1 2024	200	800	25.00%	1.9	4.2
Q3 2023	100	700	14.29%	2.1	4.8
Q4 2024	350	950	36.84%	1.75	3.6
Q3 2025	500	1200	41.67%	1.5	3
Q2 2025	450	1100	40.91%	1.6	3.2
