# Supplementary material
Source: ML conference proceedings conference paper supplement (https://openreview.net/forum?id=IGYQ4c92e2)
Supplement: supplementary_material [file MediConn_Solutions_Website_Traffic_Insights.xlsx]

## Sheet: Website_Traffic_Insights
Quarter	Traffic_Source	Traffic_Percentage	Strategic_Importance
The fiscal quarter and year for which the website traffic data is reported, e.g., Q1 2025.	The origin of the website traffic, such as 'Organic SEO', 'Paid Search', 'Social Media', etc.	The percentage of total website traffic that comes from the specified source during the given quarter.	A brief description of the strategic value or significance of the traffic source to the company's marketing efforts.
Q4 2024	Organic SEO	18.00%	SEO continues to be a stable source of traffic but requires consistent updates.
Q2 2024	Paid Search	14.00%	Seasonal promotions and discounts through search ads.
Q1 2025	Organic SEO	22.00%	Understanding the importance of SEO in our digital presence and optimizing our content marketing strategy accordingly.
Q1 2025	Direct Traffic	20.00%	Strong brand recognition resulting in direct visits.
Q2 2024	Referrals	8.00%	Partnerships with industry influencers and affiliates.
Q1 2025	Paid Search	15.00%	Paid campaigns to boost product launches and seasonal sales.
Q4 2024	Social Media	9.00%	Seasonal campaigns on social platforms to boost engagement.
Q1 2025	Social Media	10.00%	Leveraging social platforms for brand awareness and engagement.
Q1 2025	Email Marketing	13.00%	Automated campaigns for new product announcements.
Q3 2024	Email Marketing	12.00%	Targeted emails to retain and engage existing customers.
