# Supplementary material
Source: ML conference proceedings conference paper supplement (https://openreview.net/forum?id=IGYQ4c92e2)
Supplement: supplementary_material [file MediConn_Third_Party_Breach_Analysis_Q2_Review.xlsx]

## Sheet: Third_Party_Breach_Analysis_Q2_
Breach_ID	Breach_Date	Third_Party_Involved	Data_Compromised	Impact_Severity	Regulatory_Implications
Unique identifier for each data breach incident to ensure traceability and reference.	Date when the breach was reported or identified, providing a timeline for the incident.	Indicates whether a third party was involved in the breach, highlighting potential external vulnerabilities.	Type of data compromised during the breach, such as personal patient information or financial records.	Severity of the breach impact categorized as Low, Medium, or High, to assess the potential damage.	Regulatory changes or considerations resulting from the breach, informing compliance and security strategy.
BR2025-0010	2025-06-15	TRUE	Patient Data	High	Regulatory update to enhance third-party data protection
BR2025-0006	2025-05-15	FALSE	Marketing Data	Low	Update marketing data storage protocols
BR2025-0009	2025-06-10	TRUE	Payment Information	High	Strengthened third-party payment gateways
BR2025-0007	2025-05-25	TRUE	Insurance Details	Medium	Revised third-party compliance checklist
BR2025-0008	2025-06-05	FALSE	Employee Credentials	Low	Enhanced internal access controls
BR2025-0003	2025-04-20	TRUE	Customer Information	High	Immediate notification to affected customers
BR2025-0002	2025-04-10	FALSE	Internal Employee Data	Low	Internal security audit recommended
BR2025-0005	2025-05-10	TRUE	Healthcare Records	High	Increased scrutiny on third-party agreements
BR2025-0001	2025-04-05	TRUE	Financial Records	Medium	Review of third-party data handling policies
BR2025-0004	2025-05-01	FALSE	Vendor Contracts	Medium	No regulatory changes required
