# Supplementary material
Source: ML conference proceedings conference paper supplement (https://openreview.net/forum?id=IGYQ4c92e2)
Supplement: supplementary_material [file MediConn_Third_Party_Compliance_Insights.xlsx]

## Sheet: Third_Party_Compliance_Insights
Quarter	Compliance_Rate	Regulation_Impact
The fiscal quarter and year for which the compliance rate is being reported. This helps to track compliance over time.	The percentage of third-party vendors in compliance during the specified quarter. This is crucial for assessing vendor risk and guiding regulation implementation.	A brief description of how the compliance rate affects regulatory actions and security measures. This provides context for cybersecurity decision-makers.
Q1 2025	55.00%	Helps assess vendor risk, guiding regulation implementation to improve security.
Q1 2023	44.00%	Ongoing challenges in compliance, requiring enhanced vendor oversight.
Q2 2024	48.00%	Slight decrease, prompting review of security measures.
Q3 2024	50.00%	Compliance rate stable, maintaining current regulatory measures.
Q1 2024	47.00%	Low compliance rate, increased regulatory scrutiny required.
Q3 2023	46.00%	Stable rates, suggesting need for more proactive measures.
Q2 2023	45.00%	Consistent with previous quarters, no immediate regulatory changes.
Q4 2023	49.00%	Modest increase, indicating effectiveness of recent policies.
Q4 2024	52.00%	Slight improvement in vendor risk assessment and regulatory actions.
