# Supplementary material
Source: ML conference proceedings conference paper supplement (https://openreview.net/forum?id=IGYQ4c92e2)
Supplement: supplementary_material [file onboarding-performance-report.pdf › drbench/data/tasks/DR0009/files/qa_1755704406/onboarding-performance-report.pdf]

# Q1 2025 Onboarding Performance Insights

## Introduction

As the Talent Acquisition Manager at MediConn Solutions, it is essential to evaluate our onboarding process to ensure a seamless transition for new hires. This report aims to provide insights into our onboarding performance in Q1 2025, highlighting areas of improvement and opportunities for growth. By analyzing our onboarding metrics, we can optimize our process to enhance the overall employee experience. This report will inform strategic decisions to improve our onboarding program and align with the company's growth objectives.

## New Hire Feedback and Satisfaction Analysis

Our new hire feedback system has seen significant engagement since its implementation in Q3 2024, with 87% of new hires providing feedback within the first 60 days of employment. This has allowed our HR team to identify key areas of improvement, such as the need for more comprehensive training on our virtual healthcare platforms. As a result, we have implemented bi-weekly training sessions for all new hires, which has led to a 25% increase in employee satisfaction ratings. We will continue to monitor and adjust our onboarding process based on this valuable feedback.

## Onboarding Process Cycle Time and Efficiency

In an effort to streamline our onboarding process, we have implemented a new workflow management system that automates many of the administrative tasks associated with bringing on new hires. This system has reduced the workload of our HR team by 30% and has allowed us to reallocate resources to more strategic initiatives. Additionally, we have established a cross-functional team to review and optimize our onboarding process on a quarterly basis. This team has identified several areas for improvement, including the need for more standardized training protocols.

## Training Program Effectiveness and ROI Evaluation

Our training program for new hires has seen a significant return on investment, with a 20% reduction in errors and a 15% increase in productivity among new hires who have completed the program. We have also seen a 90% satisfaction rate among new hires with the training program, which has led to increased employee retention and reduced turnover. As a result, we are expanding our training program to include additional modules on virtual healthcare best practices and industry-specific regulations. We expect to see continued improvements in employee performance and satisfaction as a result of this investment.

## Conclusion

In conclusion, our Q1 2025 onboarding performance highlights opportunities for improvement in process efficiency and training program effectiveness. To address these areas, I recommend implementing a new onboarding software and revising our training curriculum. By prioritizing these initiatives, we can enhance the employee experience, reduce turnover rates, and drive business growth. Next steps will involve collaborating with the HR team to develop a comprehensive onboarding strategy and presenting recommendations to senior leadership.
