# Supplementary material
Source: ML conference proceedings conference paper supplement (https://openreview.net/forum?id=IGYQ4c92e2)
Supplement: supplementary_material [file onboarding-performance-review.pdf › drbench/data/tasks/DR0010/files/qa_1755712284/onboarding-performance-review.pdf]

# Q3 2025 Onboarding Performance Review

## Introduction

As part of our ongoing efforts to optimize operational efficiency, this report provides an overview of key performance metrics related to employee onboarding and training. The purpose of this review is to identify areas for improvement and inform strategic decisions for future growth. The following sections outline our findings and recommendations. All data is current as of Q3 2025.

## New Hire Training Program Effectiveness

Our new hire training program has been well-received, with a 95% satisfaction rate among new hires in Q2 2025. The program's focus on virtual healthcare best practices and compliance has resulted in a 25% reduction in errors reported by new hires during their first 6 months on the job. To further enhance the program, we are exploring the integration of AI-powered training modules and gamification elements. A pilot program is slated to launch in Q1 2026.

## Employee Onboarding Time and Efficiency Metrics

According to a recent industry report, the average cost of onboarding a new employee in the virtual healthcare sector is approximately \$1,500. This cost can be attributed to the need for specialized training and equipment. To mitigate these costs, we have implemented a buddy system, pairing new hires with experienced colleagues to facilitate knowledge sharing and reduce the need for external training resources. As of Q2 2025, 80% of new hires have reported positive experiences with the buddy system.

## Staffing Capacity Planning for Q4 2025

Our forecasting models indicate a 15% increase in patient volume during Q4 2025, driven in part by the flu season and holiday-related injuries. To ensure adequate staffing, we are planning to hire an additional 10 licensed healthcare professionals and 5 support staff. Interviews are slated to begin in late September, with offers extended by mid-October. This will enable us to meet the anticipated demand while maintaining our commitment to high-quality patient care.

## Conclusion

Based on our analysis, we have identified opportunities to streamline our onboarding process and improve training outcomes. Recommendations for implementation are outlined in the preceding sections. By prioritizing these initiatives, we can enhance our competitiveness and better support business growth. Next steps will involve collaborating with key stakeholders to develop a comprehensive action plan.
