# Supplementary material
Source: ML conference proceedings conference paper supplement (https://openreview.net/forum?id=IGYQ4c92e2)
Supplement: supplementary_material [file Onboarding_Materials_Great_Pasta.pdf › services/drbench_tools/src/data/users/susan.smith/nextcloud/Employee Records/Onboarding Materials/Onboarding_Materials_Great_Pasta.pdf]

# Onboarding Materials for New Employees at Great Pasta

Laura Johnson

October 2023

## 1 Introduction

Great Pasta, a leading provider of Italian food products since 1895, has consistently focused on delivering the best pasta to its customers around the world. With over 25,000 employees engaged in various aspects of production, distribution, and marketing, effective onboarding is critical for employee success and retention. This document outlines the onboarding materials that new hires, like Susan Smith, will encounter in the `home/susan.smith/Employee Records/Onboarding Materials` directory.

## 2 Onboarding Process Overview

The onboarding process at Great Pasta is designed to integrate new employees into the company culture and equip them with the necessary skills to thrive. It includes several key components: orientation sessions, training modules, mentorship programs, and access to essential resources. The following diagram illustrates the onboarding timeline for new employees:

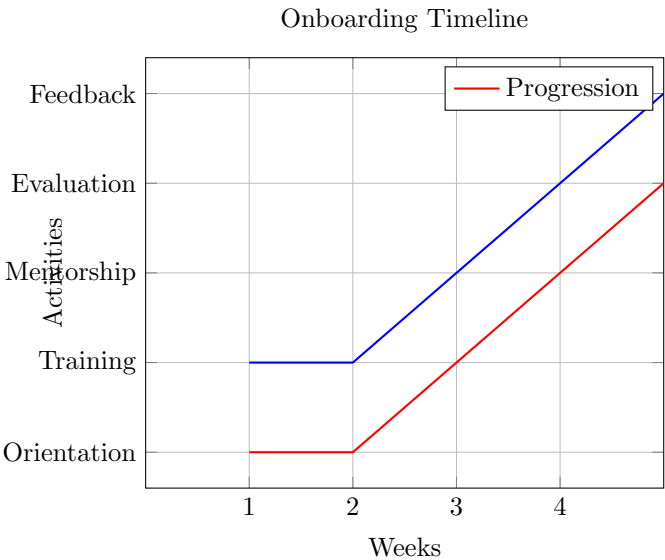

## 3 Training Modules

New hires will complete a series of interactive training modules tailored to their specific roles. For instance, production staff will undergo training focused on quality control and safety standards, while marketing personnel will learn about brand guidelines and campaign strategies.

Statistics indicate that comprehensive onboarding programs can improve employee retention by up to 25% (source: *Harvard Business Review*). This statistic underscores the importance of providing new employees with a solid foundation in their roles.

## 4 Mentorship Programs

Great Pasta encourages a mentorship culture where seasoned employees guide newcomers. This relationship fosters collaboration and supports knowledge transfer. Each new employee is paired with a mentor who assists them in navigating their first few months, enhancing their productivity and engagement.

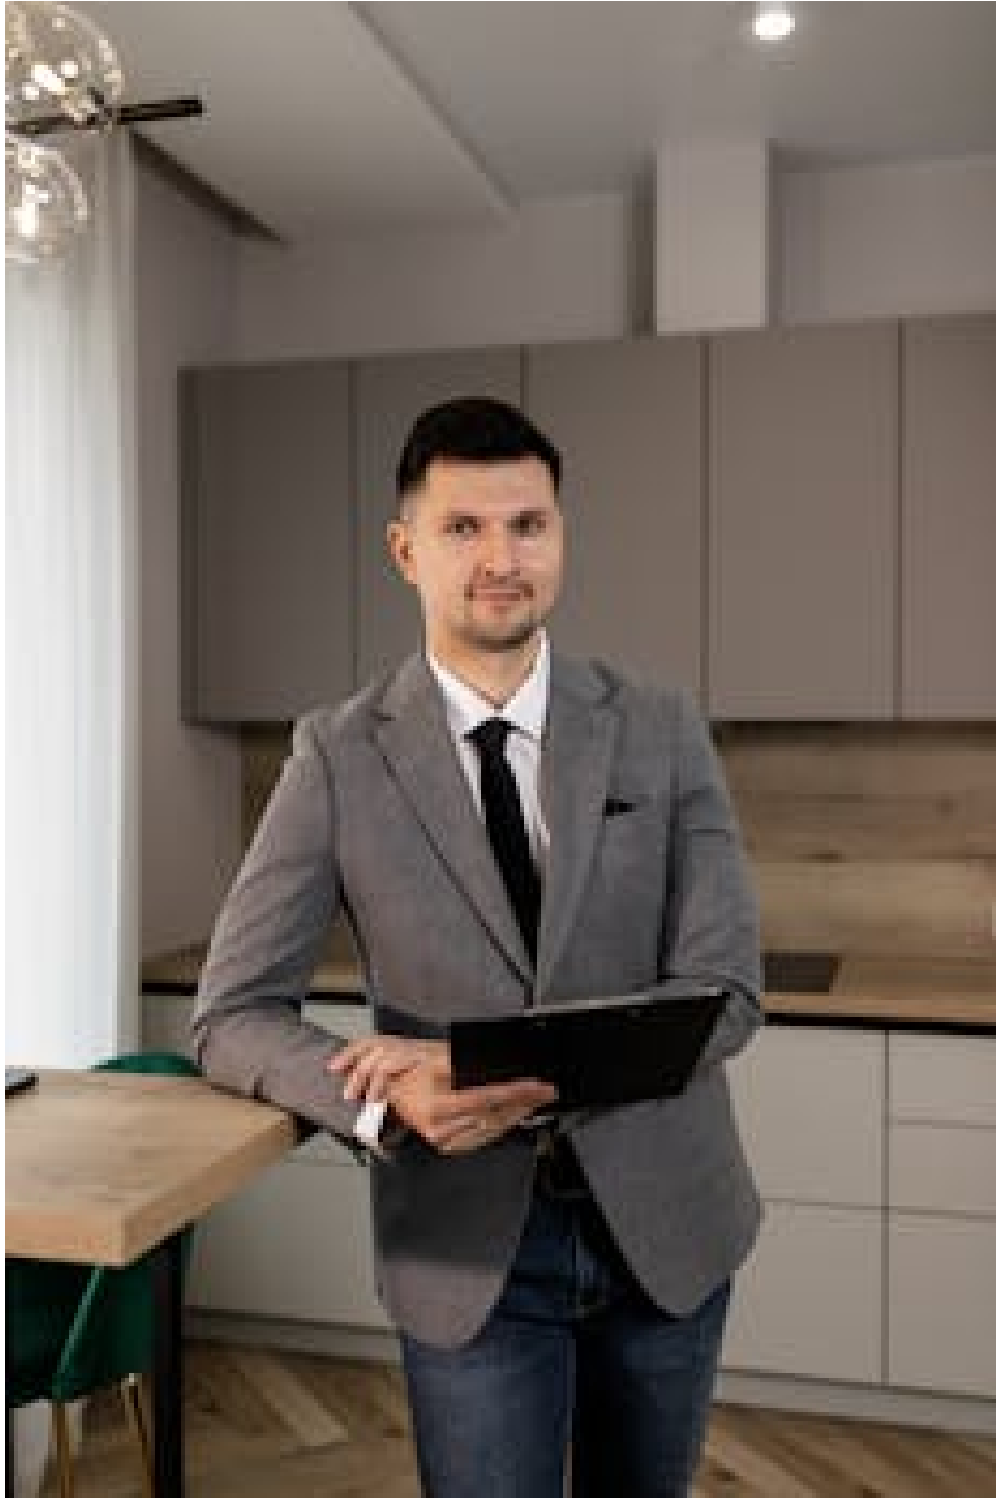

A mentor guiding a new employee through the onboarding process.

## 5 Resources and Support

New employees have access to a wealth of resources, including handbooks, online platforms, and support from HR. The `home/susan.smith/Employee Records/Onboarding Materials` directory contains essential documents, such as:

- Employee Handbook
- Safety Guidelines
- Training Schedules
- Company Policies

## 6 Conclusion

An effective onboarding process is vital for the success of both new employees and the company. By implementing structured programs, Great Pasta not only enhances employee satisfaction but also strengthens its workforce. Investing in onboarding ultimately leads to a more skilled and loyal employee base.

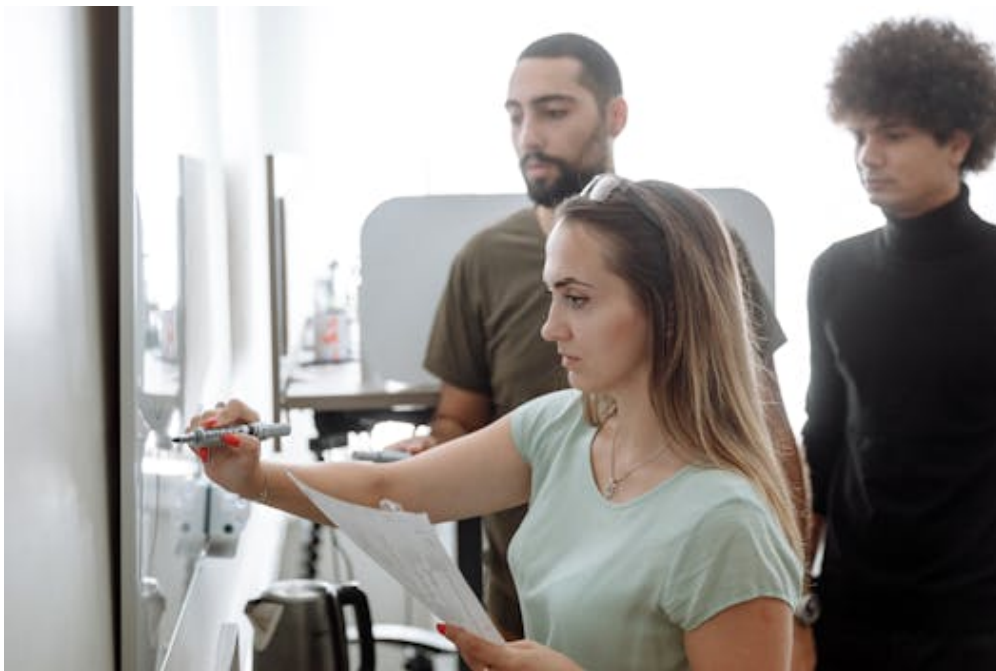

A successful onboarding session in progress.
