# Supplementary material
Source: ML conference proceedings conference paper supplement (https://openreview.net/forum?id=IGYQ4c92e2)
Supplement: supplementary_material [file partnership-growth-report.pdf › drbench/data/tasks/DR0007/files/qa_1755703148/partnership-growth-report.pdf]

# Q2 2024 Partnership Growth Report

## Introduction

As we continue to expand our virtual healthcare services across Canada, it is essential to track our progress in forming strategic partnerships with healthcare providers. This report aims to provide an overview of our partnership growth initiatives in Q2 2024. By analyzing key metrics and trends, we can refine our business strategy and optimize our partnership development efforts. This document is intended for internal stakeholders seeking insights into our partnership growth performance.

## Healthcare Provider Engagement and Outreach Strategies

To enhance our healthcare provider network, the business development team attended 15 industry conferences in 2023, resulting in a 30% increase in leads compared to the previous year. Our outreach strategy focuses on building relationships with key decision-makers at healthcare organizations. The marketing department has also developed targeted campaigns to promote the benefits of partnering with MediConn Solutions, reaching over 500 potential partners through email and social media channels. By leveraging these tactics, we aim to establish a robust network of healthcare providers across Canada.

## Q2 2024 Partnership Acquisition and Integration Metrics

In Q2 2024, our IT department successfully integrated 90% of new partners into our digital platform within an average of 6 weeks, exceeding our internal benchmark by 20%. This achievement demonstrates our team's efficiency in onboarding new partners and ensuring seamless integration with our systems. Furthermore, we conducted 12 training sessions for our customer support team to ensure they are equipped to handle inquiries from new partners. Our focus on operational excellence enables us to deliver high-quality services to our growing network of healthcare providers.

## Market Trends and Competitive Landscape Analysis

The virtual healthcare market in Canada is expected to grow by 25% annually from 2023 to 2025, driven by increasing demand for remote healthcare services. Our market research indicates that 60% of Canadians are willing to use virtual healthcare services, presenting a significant opportunity for MediConn Solutions to expand its market share. We are closely monitoring the competitive landscape, with a focus on the strategies and offerings of key players in the industry. By staying informed about market trends and competitor activity, we can refine our business strategy and maintain a competitive edge.

## Conclusion

In conclusion, our Q2 2024 partnership growth initiatives have shown promising results, with opportunities for further improvement. By leveraging these insights, we can adjust our business strategy to better align with the evolving needs of our healthcare provider partners and the virtual healthcare market. Recommendations for future partnership growth initiatives will be presented in a subsequent report. Key stakeholders will be notified of any updates to our partnership development strategy.
