# Supplementary material
Source: ML conference proceedings conference paper supplement (https://openreview.net/forum?id=IGYQ4c92e2)
Supplement: supplementary_material [file Patient-Engagement-Strategies.docx]

# Leveraging CRM for Patient Engagement Strategies

## Introduction

As a key player in the virtual healthcare space, MediConn Solutions is committed to delivering innovative solutions that enhance patient experience and drive business growth. This document explores the potential of CRM solutions in improving patient engagement and retention, a critical area of focus for our business development team. By examining the current landscape and future trends, we can identify opportunities to optimize our patient-centric approach and stay ahead of the competition. This analysis is designed to inform strategic decisions and drive revenue growth for our virtual healthcare services.

## CRM Landscape Overview

The global CRM market is expected to reach $50 billion by 2027, driven by the increasing adoption of cloud-based solutions and the need for improved customer relationship management. A recent study found that 75% of organizations are prioritizing CRM implementation to enhance customer experience. As a result, CRM vendors are investing heavily in research and development to stay ahead of the competition.

## Key Performance Indicators for Success

To measure the success of our patient engagement initiatives, we use a range of key performance indicators, including patient satisfaction ratings, treatment completion rates, and overall patient retention. These metrics have been instrumental in helping us identify areas for improvement and optimize our patient engagement strategies. For example, we've seen a 15% increase in patient satisfaction ratings since implementing our new patient communication strategy.

## Future-Proofing Patient Retention

To future-proof our patient retention strategies, we're exploring innovative technologies, such as artificial intelligence and machine learning, to improve patient engagement and streamline our outreach efforts. This includes leveraging data analytics to identify high-risk patients and intervening early to prevent readmissions. By adopting these cutting-edge technologies, we can stay ahead of the curve and continue to deliver exceptional patient care.

## Patient Engagement Strategies in Motion

Our analysis reveals that currently, 35% of our patients are actively utilizing our CRM solution, a significant step towards improving patient engagement and retention. Furthermore, our projections indicate a 20% increase in patient participation by Q2 2025, underscoring the importance of leveraging trendy new CRM solutions to drive these improvements. As we continue to refine our digital platforms, it is essential to focus on AI-driven personalization and automation, integrating closely with chronic care management tools. Enhanced patient data security and cloud-based platforms will be prioritized to improve patient engagement and retention.

## Innovative Solutions for Enhanced Engagement

In addition to our patient communication strategy, we're also exploring innovative solutions, such as mobile apps and online portals, to enhance patient engagement and improve health outcomes. These solutions have been designed to provide patients with easy access to their medical information and enable them to take a more active role in their care. We're seeing promising results, with a 20% increase in patient engagement through these channels.

## Case Studies in Patient-Centric Care

A recent case study published in the Journal of Healthcare Management found that patient-centric care initiatives can lead to significant improvements in patient outcomes and reduced healthcare costs. The study highlighted the importance of effective communication and coordination between healthcare providers and patients. We're committed to continuing this research and exploring new ways to improve patient outcomes and enhance the overall patient experience.

## Unlocking CRM's Full Potential for Growth

To unlock the full potential of our CRM system, we're investing in ongoing training and support for our sales team. This includes regular coaching sessions and access to CRM-specific resources and training materials. By empowering our sales team with the tools and knowledge they need to succeed, we can drive revenue growth and improve overall team performance.

## Conclusion

In conclusion, leveraging CRM solutions can have a significant impact on patient engagement and retention. By understanding the current landscape and future trends, we can identify opportunities to optimize our patient-centric approach and drive revenue growth for our virtual healthcare services. As we move forward, it is essential to prioritize patient engagement and retention, and to continuously evaluate and refine our strategies to stay ahead of the competition. By doing so, we can ensure sustainable growth and success for MediConn Solutions.
