# Supplementary material
Source: ML conference proceedings conference paper supplement (https://openreview.net/forum?id=IGYQ4c92e2)
Supplement: supplementary_material [file Patient-Engagement-Strategies.docx]

# Enhancing Patient Engagement Strategies

## Introduction

As a Business Development Representative, I aim to explore the potential of leveraging new CRM solutions to improve patient engagement and retention, aligning with MediConn Solutions' commitment to providing accessible and cost-effective care. This document will examine the current state of CRM solutions and their prospects for innovation in 2025.

## Trends in Digital Health Platforms

The digital health landscape is rapidly evolving, with a growing emphasis on interoperability and data standardization. At MediConn Solutions, we're committed to staying at the forefront of these trends, ensuring our platforms are always adaptable to the latest technologies. Our team has been working closely with industry partners to develop standards for secure data exchange.

## Patient Data Security and Compliance

As part of our ongoing commitment to patient data security, we're implementing a new encryption protocol across all our platforms. This will enhance our compliance with regulatory requirements and further reassure our customers of the robust protection we provide. Our IT team is working diligently to implement this update, which is expected to be completed by Q2.

## Evaluating CRM Ecosystems

Our analysis suggests that integrating AI-driven personalization and automation features into our CRM ecosystem will lead to a significant reduction in patient complaints. By Q3 2025, we anticipate a minimum 15% decrease in complaints, driven by the enhanced patient engagement and retention enabled by these features. This milestone is crucial for our business, as it will allow us to better serve our clients and maintain a competitive edge in the market.

## Strategic Partnerships for Growth

Our recent partnership with a leading healthcare organization has opened up new opportunities for collaboration and knowledge sharing. We're excited to leverage each other's expertise to improve patient outcomes and drive business growth. Our business development team has been working closely with their counterparts to identify potential synergies and develop a comprehensive partnership strategy.

## Innovative CRM Solutions for 2025

As we look to the future, we're eager to explore innovative CRM solutions that can help us stay ahead of the curve. Our team has been conducting market research to identify emerging trends and technologies that can enhance patient engagement and retention. We're particularly interested in exploring the potential of artificial intelligence in CRM, as it could revolutionize the way we interact with patients.

## Conclusion

In conclusion, MediConn Solutions should consider adopting innovative CRM solutions to enhance patient engagement and retention. This will require a thorough evaluation of current solutions and their potential for growth. Recommendations for strategic partnerships and data security measures are also crucial for success. Future-proofing our approach will ensure continued growth and patient trust.
