# Supplementary material
Source: ML conference proceedings conference paper supplement (https://openreview.net/forum?id=IGYQ4c92e2)
Supplement: supplementary_material [file Patient-Engagement-Strategies.pdf › drbench/data/tasks/DR0009/files/IN001/Patient-Engagement-Strategies.pdf]

# Enhancing Patient Engagement Strategies

## Introduction

As a key player in virtual healthcare, MediConn Solutions is committed to fostering strong patient relationships. In this report, we will explore innovative CRM solutions to improve patient engagement and retention. As a Business Development Representative, I will examine how our current CRM system can be leveraged to drive growth. This analysis aims to identify areas for improvement and inform future strategies.

## Optimizing Customer Journey Mapping

Our recent analysis suggests that by integrating AI-powered chatbots into our CRM solution by Q2 2025, we can potentially boost revenue by 25%, driven by improved patient engagement and retention. This is a significant opportunity for us to leverage new CRM solutions to enhance patient interactions and optimize the customer journey. By doing so, we can capitalize on the growing demand for digital health solutions and improve operational efficiency. As we continue to explore the best practices in patient engagement, we will need to prioritize patient data security and cloud-based platforms to ensure seamless integration.

## CRM Integration Strategies

To optimize our CRM integration, we've established a dedicated CRM team within our sales department, responsible for ensuring seamless data exchange between our various systems. This team has been instrumental in streamlining our sales process, reducing errors, and improving reporting accuracy. In the past year, we've witnessed a 15% reduction in sales cycle time and a 20% increase in sales productivity, directly attributable to their efforts.

## Patient Feedback Analysis

Regular patient feedback analysis has been a crucial aspect of our patient engagement strategy, allowing us to identify and address areas of concern. By analyzing patient feedback, we've been able to optimize our patient communication channels, resulting in a 30% reduction in patient complaints and a 25% increase in patient referrals. Our patient feedback analysis has also helped us to identify high-risk patients, enabling early intervention and improved health outcomes.

## Future-Proofing Our CRM Approach

To future-proof our CRM approach, we've been exploring innovative solutions to improve patient engagement and retention. One area of focus has been on enhancing patient data security, leveraging cloud-based platforms to improve data exchange and reduce errors. Our goal is to ensure seamless data exchange between our systems, enabling real-time insights and improved patient care.

## Streamlining Patient Onboarding

Streamlining patient onboarding has been a key priority for our team, as we've seen significant benefits from implementing automated onboarding processes. This has resulted in a 25% reduction in onboarding time and a 15% increase in patient satisfaction. By leveraging our new onboarding tool, we've been able to better track patient progress and identify areas of concern, enabling early intervention and improved health outcomes.

## Conclusion

By implementing a more effective CRM system, MediConn Solutions can improve patient engagement and retention. To achieve this, we must stay informed about the latest trends in CRM solutions and adapt our strategies accordingly. This report highlights key takeaways and next steps for enhancing our patient engagement strategies. By prioritizing patient satisfaction, we can drive long-term growth and success.
