# Supplementary material
Source: ML conference proceedings conference paper supplement (https://openreview.net/forum?id=IGYQ4c92e2)
Supplement: supplementary_material [file policy_updates_report.pdf › services/drbench_tools/src/data/users/susan.smith/nextcloud/Reports/Policy Updates/policy_updates_report.pdf]

# 2023 Policy Update: Sustainability Initiatives at Great Pasta

Emily Johnson

April 10, 2025

## 1 Introduction

Great Pasta, founded in 1895 in Rome, Italy, has built an enduring legacy as a provider of the finest pasta and Italian food products. With a mission to make the best pasta accessible to everyone, the company has expanded its operations to over 25,000 employees globally. In recent years, a growing emphasis on sustainability has influenced not only the production processes but also the policy updates aimed at improving our environmental impact. This document outlines key policy updates regarding sustainability initiatives and their implications for our operations and community engagement.

## 2 Sustainability Initiatives

The updated policies focus on three main areas: sourcing, production, and waste management. Each area will be addressed with specific initiatives and performance metrics.

### 2.1 Sourcing

To enhance the sustainability of our pasta, Great Pasta is committed to sourcing ingredients from local farmers who practice sustainable agriculture. This initiative not only supports local economies but also reduces carbon emissions associated with transportation.

### 2.2 Production

The production process is being revised to incorporate renewable energy sources. We aim for 50% of our energy needs to be met through renewable sources by 2025. Our production facilities are undergoing retrofitting to include solar panels and energy-efficient machinery.

### 2.3 Waste Management

Reducing waste is a key focus. We aim for zero waste in our production facilities by 2030. This includes recycling initiatives and partnerships with organizations that can repurpose waste materials.

### 3 Visualizing Our Progress

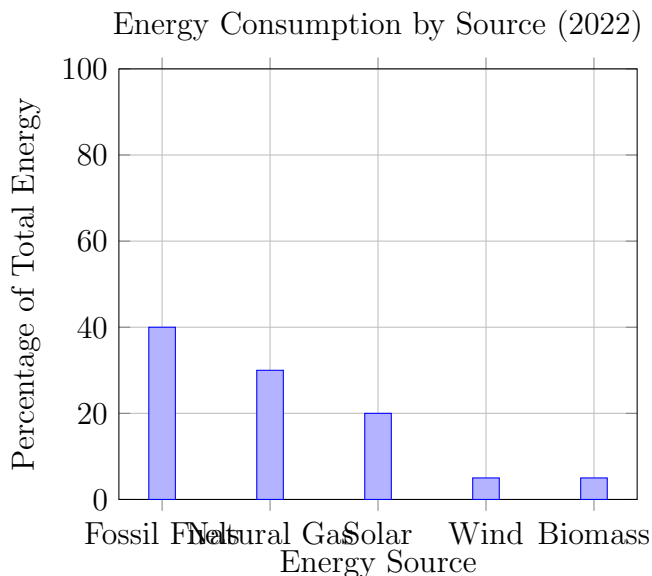

Figure 1: Energy consumption breakdown by source in 2022.

As illustrated in Figure 1, fossil fuels still account for a significant portion of our total energy consumption. The goal is to reduce this reliance on fossil fuels by increasing investments in renewable energy.

### 4 Community Engagement

Great Pasta believes in not only improving its operations but also in enhancing community engagement through sustainability initiatives. Community workshops are held to educate local farmers and consumers about sustainable practices. Over 200 workshops have been conducted since 2020, reaching over 5,000 participants.

### 5 Challenges and Next Steps

While significant progress has been made, challenges remain. Transitioning to renewable energy sources requires substantial investment and time. Additionally, ensuring that all suppliers meet sustainability standards is an ongoing effort.

#### 5.1 Future Goals

- Achieve 50% energy consumption from renewable sources by 2025.
- Reduce carbon emissions by 30% by 2030.
- Implement a zero waste strategy by 2030.

## 6 Conclusion

The sustainability policy updates at Great Pasta represent our commitment to environmental stewardship and social responsibility. By focusing on sourcing, production, and waste management, we aim to set an industry standard for sustainability in food production. As we move forward, continuous improvement and community involvement will be essential to achieving our goals.

## 7 Appendix

### 7.1 Statistics Overview

In order to measure our progress, we utilize key performance indicators (KPIs) related to our sustainability initiatives. As of 2023, the following statistics are recorded:

- **Sourcing:** 70% of our ingredients are sourced from local farmers.
- **Production:** 35% of our energy comes from renewable sources.
- **Waste Management:** 15% of waste is recycled.

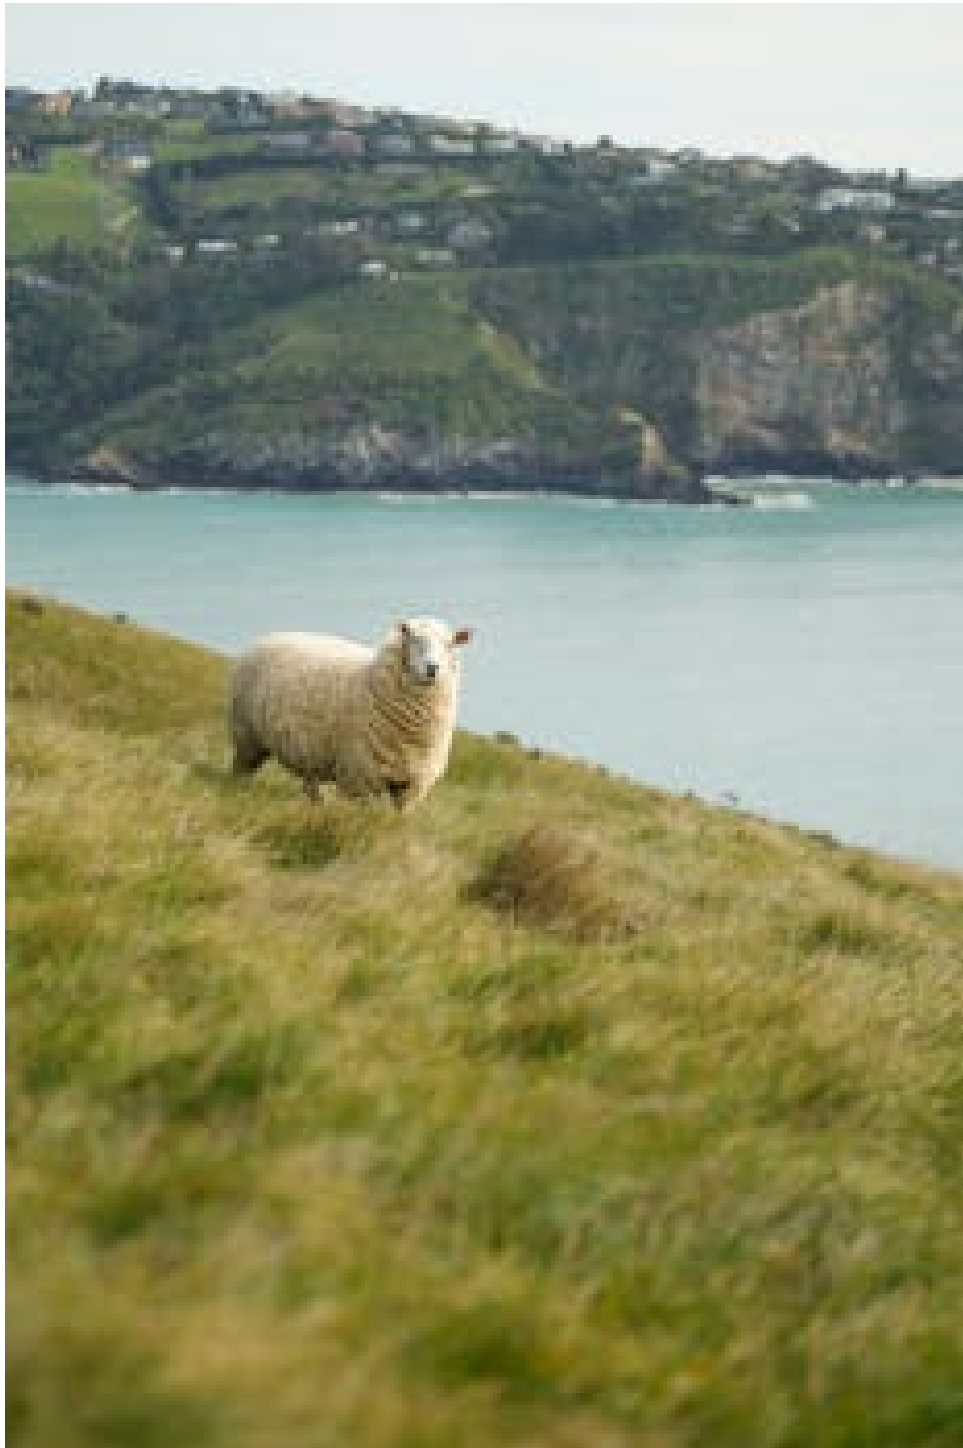

Figure 2: Sustainable farming practices in action.

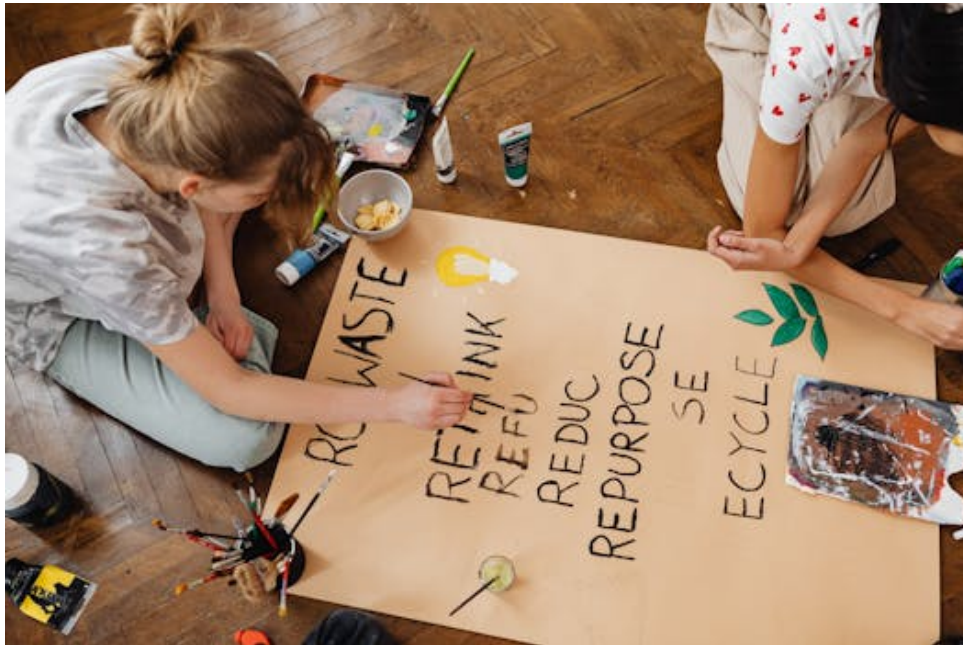

Figure 3: Community workshop on sustainable practices.
