# Supplementary material
Source: ML conference proceedings conference paper supplement (https://openreview.net/forum?id=IGYQ4c92e2)
Supplement: supplementary_material [file Q1-2025-Employee-Engagement-Report.docx]

# Employee Engagement Program Quarterly Report

## Introduction

This report provides an overview of our employee volunteer program's performance in Q1 2025, highlighting key trends and insights that inform our strategies for employee engagement and corporate social responsibility.

## Volunteer Program Objectives and Scope

Our corporate social responsibility initiatives aim to promote a culture of sustainability and community involvement. This includes partnering with local organizations to support environmental conservation and education. By integrating these values into our daily operations, we foster a sense of purpose and belonging among our employees. This, in turn, drives engagement and productivity, ultimately benefiting our customers and the environment.

## Employee Participation and Retention Metrics

Our employee retention rate for the past quarter was 92%, with an average tenure of 2.5 years. This is a testament to our commitment to employee development and well-being. We attribute this success to our comprehensive benefits package, which includes access to on-site fitness classes and wellness workshops.

## Quarterly Highlights and Accomplishments

In Q1 2025, we launched a new training program for our manufacturing team, resulting in a 25% reduction in production errors. This initiative has not only improved quality but also enhanced employee skills and job satisfaction. We plan to roll out this program to other departments in the coming months.

## Best Practices for Effective Corporate Social Responsibility

At Elexion Automotive, we believe that transparency is key to building trust with our stakeholders. As such, we conduct regular audits to ensure compliance with industry standards and regulations. Our findings are reported annually in our sustainability report, providing a comprehensive overview of our CSR initiatives and performance.

## Employee Engagement and Organization Performance

Our organization performance metrics, such as sales and revenue growth, are closely tied to employee engagement. We have seen a 15% increase in sales over the past year, which we attribute to our employee-led innovation program. This initiative encourages employees to develop and pitch new ideas, fostering a culture of creativity and collaboration.

## Conclusion

In conclusion, our employee volunteer program has made significant strides in Q1 2025, demonstrating its impact on employee engagement and organizational performance. As we move forward, we will continue to monitor and evaluate program effectiveness, identifying areas for improvement and opportunities for growth.
