# Supplementary material
Source: ML conference proceedings conference paper supplement (https://openreview.net/forum?id=IGYQ4c92e2)
Supplement: supplementary_material [file Q2-2024-Compliance-Monitoring-Report.docx]

# Quarterly Compliance Monitoring Report - Q2 2024

## Introduction

This report provides an overview of compliance audit activities for the second quarter of 2024. The purpose of this report is to inform stakeholders of the current state of compliance and identify areas for improvement.

## Compliance Audit Program Overview

Elexion Automotive's compliance audit program is designed to ensure our electric vehicles meet the stringent standards of the North American market. The program is overseen by our dedicated compliance team, which works closely with cross-functional departments to ensure seamless integration. As part of our ongoing efforts, we have implemented a robust quality control process to ensure all vehicles meet regulatory requirements. This proactive approach has enabled us to maintain a high level of compliance, reducing the risk of costly reworks and recalls.

## Audit Scope and Objectives

The scope of our compliance audits includes a thorough review of our design and manufacturing processes, as well as our supply chain management. Our objectives are clear: to ensure that our electric vehicles comply with all relevant regulations, including those related to safety, performance, and environmental impact. By focusing on these key areas, we can identify and address potential issues before they become major problems.

## Audit Planning and Coordination

The planning and coordination of our compliance audits involve a significant amount of time and resources. Our team works closely with various stakeholders, including suppliers, manufacturers, and regulatory bodies, to ensure that all aspects of the audit process are thoroughly planned and executed. By streamlining our audit process, we can reduce costs and improve efficiency, ultimately benefiting our customers and stakeholders.

## Audit Findings and Recommendations

The findings and recommendations from our compliance audits are carefully reviewed and addressed by our dedicated compliance team. We take a proactive approach to addressing any issues identified, ensuring that our electric vehicles meet the highest standards of quality and safety. This commitment to continuous improvement has enabled us to maintain a high level of compliance and reduce the risk of costly reworks and recalls.

## Audit Progress and Status

The progress and status of our compliance audits are closely monitored by our dedicated compliance team. We use a range of tools and metrics to track our progress, ensuring that all aspects of the audit process are thoroughly planned and executed. By regularly reviewing our progress, we can identify and address potential issues before they become major problems.

## Compliance Audit Results: Q2 2024

The results of our compliance audits are carefully reviewed and reported on a regular basis. This includes a detailed analysis of our audit findings and recommendations, as well as an overview of our progress and status. By providing this level of transparency, we can ensure that our stakeholders are fully informed about our compliance audit program and its outcomes.

## Conclusion

In conclusion, the compliance audit program has made significant progress in Q2 2024. Recommendations for improvement have been identified and will be implemented in the next quarter. This report provides a foundation for future compliance efforts and highlights the importance of ongoing monitoring and evaluation.
