# Supplementary material
Source: ML conference proceedings conference paper supplement (https://openreview.net/forum?id=IGYQ4c92e2)
Supplement: supplementary_material [file q2-workforce-report.pdf › drbench/data/tasks/DR0003/files/DI001_pdf/q2-workforce-report.pdf]

# Q2 2024 IT Budget and Technology Review

## Introduction

As we continue to expand our operations and enhance our customer experience, it is essential to review our IT budget and technology strategy. This report provides an overview of our Q2 2024 IT budget and highlights key areas of investment. The purpose of this report is to provide stakeholders with a comprehensive understanding of our IT budget and to identify opportunities for optimization. By reviewing our IT budget, we can ensure that our technology investments align with our business objectives.

## IT Investment Strategy and Roadmap

Lee's Market has been prioritizing cloud-based infrastructure since 2020 to improve scalability. Our IT team has successfully migrated 80% of applications to cloud services, enhancing system reliability and reducing maintenance costs. As of March 2023, we have seen a 25% decrease in IT support requests due to improved system stability. This shift aligns with our long-term goal of becoming a cloud-first organization by 2025.

## Technology Infrastructure and Maintenance Costs

The average lifespan of our in-store hardware is 5-7 years, with annual maintenance costs ranging from 10-15% of the initial investment. Our asset management team conducts quarterly reviews to identify opportunities for hardware upgrades and cost optimization. In Q1 2023, we replaced 200 outdated POS systems, resulting in a 30% reduction in maintenance requests. This proactive approach helps minimize downtime and extend equipment lifespan.

## Digital Transformation Initiatives and Progress

Lee's Market launched its e-commerce platform in 2018, which has since grown to account for 15% of total sales. Our digital transformation initiatives focus on enhancing customer experience through personalized recommendations and streamlined checkout processes. As of January 2023, we have seen a 20% increase in online sales due to targeted marketing campaigns and improved website usability. We continue to invest in digital innovation to stay competitive in the market.

## IT Budget Allocation and Utilization

Our IT department follows a rigorous budgeting process, with quarterly reviews to ensure alignment with business objectives. We allocate 60% of our IT budget to infrastructure and maintenance, 20% to digital transformation initiatives, and 20% to innovation and R&D. This allocation enables us to balance operational needs with strategic investments in emerging technologies. In 2022, we conducted an IT budgeting workshop to refine our allocation framework and improve cost transparency.

## Cybersecurity Measures and Compliance Updates

Lee's Market conducts bi-annual security audits to identify vulnerabilities and ensure compliance with industry standards. In Q4 2022, we implemented a new threat detection system, which has since reduced false positives by 40%. Our security team collaborates closely with the IT department to stay up-to-date on the latest security patches and best practices. We also provide regular training sessions for employees to promote cybersecurity awareness and prevent phishing attacks.

## Conclusion

In conclusion, our Q2 2024 IT budget reflects our commitment to investing in technology that drives business growth and enhances customer experience. By optimizing our IT budget and investing in strategic initiatives, we can improve operational efficiency and stay competitive in the market. Recommendations for future IT budget allocations will be based on a thorough analysis of our business objectives and technology requirements. Next steps include reviewing and refining our IT investment strategy to ensure alignment with our business goals.
