# Supplementary material
Source: ML conference proceedings conference paper supplement (https://openreview.net/forum?id=IGYQ4c92e2)
Supplement: supplementary_material [file Q3-Attendance-Report.pdf › drbench/data/tasks/DR0003/files/DI004_pdf/Q3-Attendance-Report.pdf]

# Q3 2024 Employee Attendance and Engagement Report

## Introduction

As we continue to expand our operations across the U.S. and Canada, it is essential that we monitor and analyze employee attendance trends to ensure optimal staffing levels and maintain our high standards of customer service. This report provides an overview of key attendance metrics for Q3 2024, highlighting areas of strength and opportunities for improvement. The insights and recommendations presented in this report will inform our employee engagement and retention strategies moving forward. By leveraging data-driven insights, we can foster a more productive and supportive work environment that benefits both our employees and our customers.

## Employee Demographics and Attendance Patterns

Our analysis of employee demographics revealed that 62% of Lee's Market staff identify as Asian-American, aligning with the company's cultural values. Furthermore, the average employee tenure has increased by 12 months since 2020, demonstrating improved job satisfaction. This shift in demographics and tenure has led to enhanced customer engagement, with a 15% increase in customer loyalty program sign-ups. As a result, we have adjusted our recruitment strategies to target more diverse candidates.

## Shift Scheduling and Labor Law Compliance

To ensure compliance with labor laws, Lee's Market implemented a new shift scheduling system in Q2 2023. This system has reduced scheduling conflicts by 28% and improved employee work-life balance. As a result, we have seen a significant decrease in labor law-related complaints, with only 5 reported incidents in the past 12 months. The new system has also enabled more efficient staffing during peak periods, such as holidays and sales events.

## The Impact of Training Programs on Employee Engagement

Lee's Market has invested heavily in employee training programs, with a 25% increase in training hours per employee since 2022. This investment has yielded positive results, with a 12% increase in employee engagement and a 9% increase in customer satisfaction ratings. Our training programs focus on cultural awareness, customer service, and product knowledge, ensuring that employees are equipped to provide exceptional service to our diverse customer base. As a result, we have seen a significant reduction in customer complaints, with a 20% decrease in the past 12 months.

## Quarterly Absence Rates and Trends Analysis

Our quarterly analysis of sales trends revealed that Lee's Market experiences a significant spike in sales during the Lunar New Year, with a 30% increase in revenue compared to other quarters. This trend has led us to adjust our inventory management and staffing strategies to accommodate the increased demand. Additionally, we have implemented targeted marketing campaigns to capitalize on this trend, resulting in a 15% increase in customer acquisition during the Lunar New Year period. By understanding these sales trends, we can optimize our business operations to meet customer needs.

## Strategies for Enhancing Employee Well-being and Retention

Lee's Market has implemented various initiatives to enhance employee well-being and retention, including an employee assistance program (EAP) and a recognition and rewards system. The EAP has seen a 20% utilization rate since its introduction in 2022, demonstrating its value to employees. Our

recognition and rewards system has also yielded positive results, with a 15% increase in employee satisfaction ratings. By prioritizing employee well-being and recognition, we aim to create a positive work environment that fosters employee loyalty and retention.

## Conclusion

In conclusion, our Q3 2024 attendance data reveals opportunities for improvement in employee engagement and retention. By implementing targeted strategies to address the root causes of absenteeism and promoting a culture of well-being, we can reduce turnover rates and improve overall job satisfaction. Recommendations from this report will be used to inform our employee engagement initiatives and track progress over time. We are committed to creating a positive and supportive work environment that enables our employees to thrive and deliver exceptional customer experiences.
