# Supplementary material
Source: ML conference proceedings conference paper supplement (https://openreview.net/forum?id=IGYQ4c92e2)
Supplement: supplementary_material [file q3-workforce-report.pdf › drbench/data/tasks/DR0001/files/DI001_pdf/q3-workforce-report.pdf]

# Q3 2024 Workforce Trends and Insights Report

## Introduction

As we continue to navigate the complexities of the retail landscape, it is essential that we prioritize employee retention and development to drive business success. This report provides an overview of key workforce trends and insights from Q3 2024, highlighting areas of strength and opportunity for growth. The data and analysis presented in this report will inform strategic decision-making and support our ongoing efforts to foster a positive and productive work environment. By leveraging these insights, we can optimize our HR initiatives and improve overall business outcomes.

## Employee Engagement and Satisfaction Survey Results

Our Q2 2024 employee engagement survey revealed a 25% increase in employee participation, with the sales department demonstrating the highest level of engagement at 85%. The survey also showed that 70% of employees felt that their feedback was being heard and implemented. We are using this data to inform our employee recognition and reward programs, with a focus on quarterly team-building activities. Our next survey is scheduled for Q1 2025.

## Quarterly Hiring and Recruitment Metrics Analysis

In Q2 2024, we launched a new recruitment marketing campaign, resulting in a 30% increase in job applicants. Our hiring process was streamlined, reducing the average time-to-hire by 15 days. We also introduced a new employee referral program, which accounted for 20% of new hires in Q2 2024. Our recruitment team is continuing to optimize the hiring process to meet growing business demands.

## Workforce Composition and Demographic Trends

As of Q2 2024, our workforce consists of 55% female employees and 45% male employees, with an average age of 32 years old. We have seen a 10% increase in employees from diverse ethnic backgrounds over the past year. Our HR team is developing strategies to promote diversity, equity, and inclusion in the workplace. We are also exploring ways to increase flexibility and work-life balance for our employees.

## Employee Turnover and Retention Rate Analysis

We have been analyzing industry benchmarks for employee retention strategies, including training programs and performance management systems. Our research has shown that companies with regular feedback and coaching see a 20% increase in employee retention. We are exploring ways to implement these strategies across our organization, with a focus on developing our management team's leadership skills.

## Training and Development Program Effectiveness Evaluation

In Q2 2024, we launched a new training program for our customer service team, resulting in a 25% increase in customer satisfaction ratings. The program focused on developing active listening skills and resolving customer complaints. We are evaluating the effectiveness of this program and exploring ways to expand it to other departments. Our training team is also developing new modules on leadership development and time management.

## Conclusion

In conclusion, our Q3 2024 workforce trends and insights report highlights the need for targeted strategies to address employee turnover and improve retention rates. By focusing on employee

engagement, development, and satisfaction, we can drive business success and maintain a competitive edge in the retail industry. Recommendations for future initiatives will be developed based on these findings, and progress will be monitored and reported on a quarterly basis. By working together, we can create a positive and productive work environment that supports the growth and success of our employees and our organization.
