# Supplementary material
Source: ML conference proceedings conference paper supplement (https://openreview.net/forum?id=IGYQ4c92e2)
Supplement: supplementary_material [file QA-EV-Production-Optimization.docx]

# Optimizing Quality Assurance for EV Production

## Introduction

As Elexion Automotive continues to drive innovation in electric vehicles, ensuring the highest quality standards is crucial. This document aims to provide an in-depth analysis of our current quality assurance processes, highlighting areas for improvement and opportunities for growth.

## Quality Control Strategies for EV Software

As we continue to optimize our quality assurance processes for electric vehicle production, it's essential to acknowledge the growing concerns related to software and user experience issues. Our analysis of software bug trends in Q3 2024 revealed that 60% of reported defects were linked to user experience and interface problems. This highlights the need for enhanced testing and quality assurance measures to address these critical areas. By prioritizing these issues, we can minimize the risk of poor user experiences and ensure a higher level of quality in our electric vehicles.

## Reliability Testing for Electric Powertrains

In our reliability testing lab, we simulate various environmental conditions to test the durability of our electric powertrains. Our team of engineers uses industry-standard testing equipment to subject the powertrains to extreme temperatures, humidity, and vibration, ensuring that they can withstand the demands of real-world use. This rigorous testing process helps us identify potential issues before they affect our customers.

## Collaborative Quality Management Framework

Our quality management framework is based on a collaborative approach, involving cross-functional teams to ensure that quality is integrated into every stage of the product development process. This framework helps us identify and address quality issues proactively, streamlining our production processes and improving overall product quality. By working together, we can ensure that our products meet the highest standards of quality and reliability.

## Process Optimization for Production Efficiency

To optimize our production processes, we use lean manufacturing principles and continuous improvement methodologies. By streamlining our production lines and reducing waste, we can increase efficiency and reduce costs. This approach also enables us to better respond to changing market demands and customer needs, ensuring that our products are always meeting the highest standards of quality and performance.

## Future-Proofing Quality Assurance for Emerging Trends

As the automotive industry continues to evolve, we must ensure that our quality assurance processes are future-proof. This involves staying up-to-date with the latest technologies and trends, as well as developing new skills and expertise to meet emerging demands. By doing so, we can remain ahead of the curve and ensure that our products continue to meet the highest standards of quality and performance.

## Conclusion

In conclusion, our quality assurance processes must adapt to the unique challenges of electric vehicle production. By implementing the recommendations outlined in this document, we can ensure the highest quality standards, drive innovation, and position ourselves for long-term success in the electric vehicle market.
