# Supplementary material
Source: ML conference proceedings conference paper supplement (https://openreview.net/forum?id=IGYQ4c92e2)
Supplement: supplementary_material [file Recruitment_Strategies_Great_Pasta.pdf › services/drbench_tools/src/data/users/susan.smith/nextcloud/Employee Records/Recruitment Strategies/Recruitment_Strategies_Great_Pasta.pdf]

# Recruitment Strategies for Great Pasta

Emily Johnson

October 2023

## 1 Introduction

Great Pasta, founded in 1895 in Rome, Italy, has grown to become a leading provider of pasta and Italian food products with over 25,000 employees worldwide. As part of our commitment to excellence, the recruitment strategies we implement are crucial in attracting top talent. This document outlines effective recruitment strategies and provides insights into our ongoing efforts to enhance our workforce.

## 2 Current Recruitment Landscape

In the competitive food industry, particularly in the pasta segment, attracting the right talent is essential. Recent studies indicate that 70% of job seekers research a company's culture before applying. Therefore, it is imperative that our recruitment strategies reflect Great Pasta's values and mission of providing the best pasta in the world.

### 2.1 Demographics of Job Seekers

Understanding the demographics of potential recruits helps tailor our strategies. A recent survey of job seekers in the food industry revealed that:

- 45% are aged between 25-35 years.
- 30% have a background in culinary arts or food science.
- 25% prioritize work-life balance over salary.

### 2.2 Recruitment Strategies

To attract and retain top talent, Great Pasta employs several strategies:

- **Employer Branding:** Showcasing our company culture and values through social media and the company website.
- **Employee Referral Programs:** Incentivizing current employees to refer candidates, which often leads to better cultural fits.
- **University Partnerships:** Collaborating with culinary schools to create internship programs.

## 3 Visualizing Recruitment Efforts

To illustrate the effectiveness of our recruitment strategies, we present a chart showing the increase in applications over the past three years. The data highlights how targeted recruitment efforts have led to a significant rise in candidate interest.

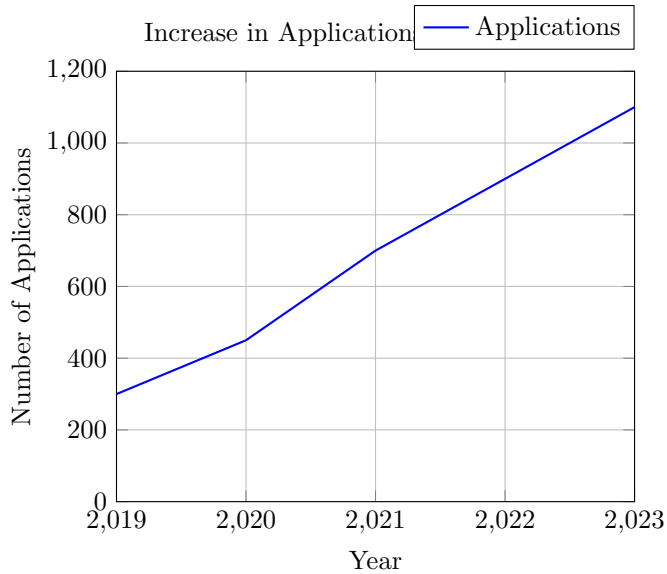

## 4 Image Examples

To further enhance our recruitment strategies, we utilize visual content. Below are examples of images that resonate with our target demographic:

## 5 Challenges in Recruitment

Despite our successes, we face challenges in recruitment, such as:

- High turnover rates in entry-level positions.
- The need to adapt to remote work trends.
- Competition from other food brands.

### 5.1 Addressing Turnover

To mitigate turnover:

- Implementing a thorough onboarding process.
- Providing continuous training and development opportunities.
- Fostering an inclusive workplace environment.

## 6 Future Directions

Looking ahead, Great Pasta aims to enhance its recruitment strategies through technology and data analytics:

- Leveraging AI for resume screening and candidate matching.
- Utilizing virtual reality for immersive job previews.
- Increasing diversity initiatives in recruitment.

## 7 Conclusion

In conclusion, recruitment strategies are vital for Great Pasta's success in maintaining a skilled workforce. By continuously adapting our approach to meet market demands and leveraging technology, we can ensure we attract the best talent in the industry.

## References

- Smith, J. (2022). Recruitment Strategies in the Food Industry. *Journal of Culinary Management*.
- Johnson, L. (2023). The Importance of Employer Branding. *HR Magazine*.

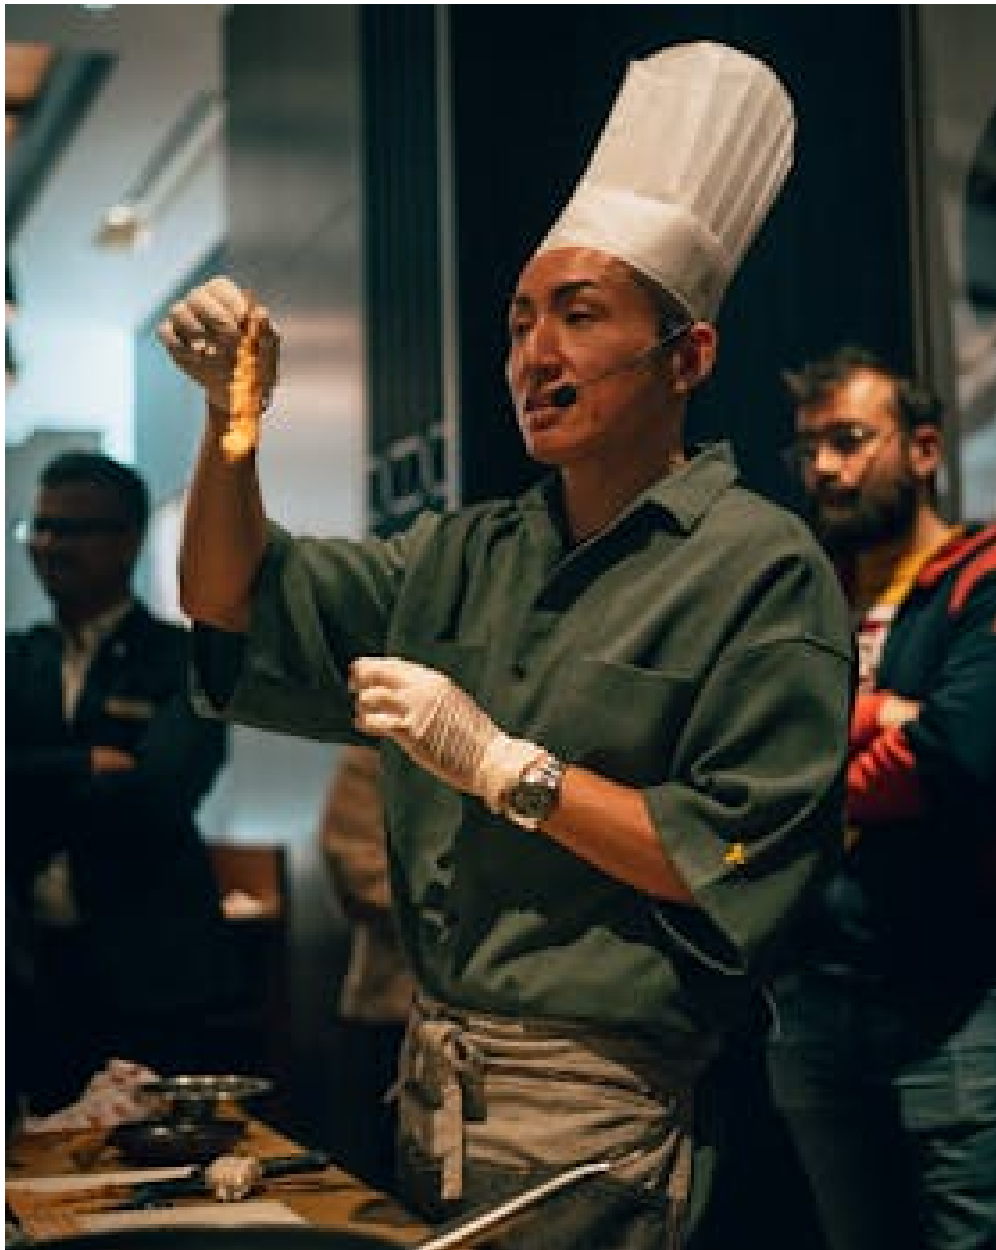

Figure 1: A vibrant image of a culinary class, representing our partnership with educational institutions.

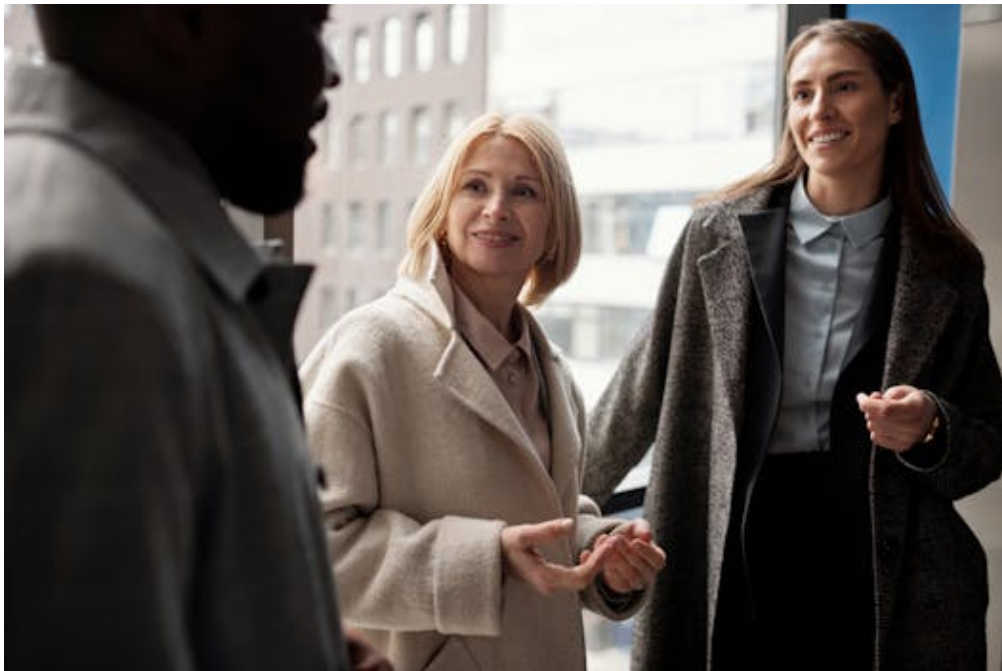

Figure 2: A diverse team of employees showcasing the inclusive culture at Great Pasta.
