# Supplementary material
Source: ML conference proceedings conference paper supplement (https://openreview.net/forum?id=IGYQ4c92e2)
Supplement: supplementary_material [file renovation-cost-report.pdf › drbench/data/tasks/DR0001/files/DI005_pdf/renovation-cost-report.pdf]

# Q2 Store Renovation Cost Analysis Report

## Introduction

As we continue to expand our footprint across the U.S. and Canada, it is essential to track and analyze our store renovation costs to ensure we are meeting our budgetary goals. This report aims to provide insights into the costs associated with renovating our stores in Q2 2024. By examining these costs, we can identify areas for improvement and optimize our renovation process. This analysis will inform our strategic decisions for future store renovations and expansions.

## Store Renovation Budget Allocation and Forecasting

Our finance team conducts quarterly reviews of store renovation budgets to ensure alignment with company-wide strategic objectives. In Q1 2024, we allocated 15% of our total capital expenditure to store renovations, with a focus on upgrading in-store technology and improving customer experience. This allocation is projected to increase by 5% in Q3 2024 to accommodate growing demand for online shopping and in-store pickup services. As part of our forecasting process, we closely monitor industry trends and adjust our budget allocations accordingly.

## Renovation Timeline and Milestone Achievements

To ensure timely completion of store renovations, our operations team develops detailed project timelines and tracks progress against key milestones. In the first half of 2024, we successfully completed renovations at 20 stores, with an average project duration of 12 weeks. Our timeline for Q3 2024 includes renovations at an additional 15 stores, with a focus on locations in high-growth urban areas. We also conduct regular review sessions to identify areas for process improvement and optimize our renovation timelines.

## Average Store Renovation Costs by Region

As part of our ongoing effort to enhance customer experience, we have been analyzing customer feedback and sales data to identify opportunities for regional product assortment optimization. In Q2 2024, we introduced a new product line of Asian-style prepared foods in our West Coast stores, which has shown promising sales results. Our marketing team is currently developing targeted promotional campaigns to support the rollout of this product line in other regions. We expect this initiative to drive sales growth and improve customer satisfaction.

## Renovation Vendor Performance and Contract Review

We maintain a rigorous vendor management process to ensure that our renovation contractors meet our high standards for quality and reliability. In Q1 2024, we conducted a comprehensive review of our vendor contracts and negotiated improved pricing terms with several key contractors. Our procurement team also implemented a new vendor performance rating system to facilitate more effective contractor selection and management. As a result, we have seen a 10% reduction in vendor-related issues and a 5% improvement in overall renovation quality.

## Capital Expenditure Planning for Future Renovations

Our company has been investing in sustainable practices and energy-efficient technologies as part of our corporate social responsibility initiative. In 2023, we completed the installation of solar panels at 10 of our locations, resulting in a 12% reduction in energy costs. We are currently exploring opportunities to integrate green building materials and energy-efficient lighting systems into our future renovation projects. Our goal is to reduce our overall carbon footprint and promote environmental sustainability in our operations.

# Conclusion

In conclusion, this report highlights the importance of tracking and analyzing store renovation costs to ensure we are meeting our budgetary goals. By identifying areas for improvement and optimizing our renovation process, we can make informed strategic decisions for future store renovations and expansions. Recommendations for future renovations will be based on the findings of this report, and progress will be closely monitored. Further analysis will be conducted to identify opportunities for cost savings and process improvements.
