# Supplementary material
Source: ML conference proceedings conference paper supplement (https://openreview.net/forum?id=IGYQ4c92e2)
Supplement: supplementary_material [file Rep-Training-Budget-2023.docx]

# Customer Service Representative Training Expenditures

## Introduction

As we continue to invest in our customer service team, it is essential to understand the annual training budget to ensure effective onboarding and upskilling. This report aims to provide insights into the training expenditures of our customer service representatives, enabling data-driven decisions for future training programs.

## Training Program Objectives and Outcomes

Our training program is designed to ensure our customer service representatives are equipped to handle a wide range of inquiries and requests. By focusing on specific skills and knowledge areas, we can better prepare our representatives to provide exceptional service to our customers. The program is structured to accommodate different learning styles and abilities, taking into account the diverse backgrounds and experiences of our representatives. By the end of the program, representatives will have a solid foundation in our products and services, enabling them to confidently address customer concerns and provide tailored solutions.

## Employee Development and Retention Strategies

To foster a positive and inclusive work environment, we encourage open communication, recognize employee achievements, and provide opportunities for professional growth and development. Our employee development strategy is designed to identify and address knowledge and skill gaps, ensuring our representatives are equipped to excel in their roles. By promoting a culture of continuous learning and improvement, we can reduce turnover rates and improve overall job satisfaction.

## Budget Allocation and Resource Utilization

Our company has a robust budgeting process that ensures accurate forecasting and allocation of resources. We carefully review and adjust our budget to reflect changes in market conditions, product offerings, and customer needs. By leveraging data analytics and performance metrics, we can optimize resource utilization and make informed decisions about investments in our representatives' training and development.

## Training Methodologies and Delivery Channels

Our training program incorporates a range of methodologies, including on-the-job training, classroom instruction, and online learning platforms. We also offer mentorship programs, peer-to-peer training, and coaching to support knowledge transfer and skill development. By providing a variety of training options, we can cater to different learning styles and preferences, ensuring our representatives have the skills and knowledge they need to succeed.

## Assessment and Evaluation Frameworks

To ensure the effectiveness of our training program, we have developed a comprehensive assessment and evaluation framework that measures knowledge retention, skill application, and performance improvement. This framework helps us identify areas for improvement and make data-driven decisions about training content, methodology, and delivery channels. By regularly reviewing and refining our framework, we can continually improve the quality and impact of our training program.

## Annual Training Budget Breakdown

Our company has a dedicated training budget that is allocated across various departments, including sales, marketing, and customer service. This budget is reviewed and adjusted regularly to reflect changes in business priorities, market trends, and customer needs. By providing a dedicated budget for training, we can ensure our representatives have access to the resources and support they need to excel in their roles.

## Conclusion

In conclusion, it is crucial to monitor and adjust the annual training budget to align with the evolving needs of our customer service representatives. Recommendations for future training programs include incorporating more virtual training sessions, increasing mentorship opportunities, and conducting regular training needs assessments. I recommend reviewing and revising the training budget to ensure optimal resource allocation and employee development.
