# Supplementary material
Source: ML conference proceedings conference paper supplement (https://openreview.net/forum?id=IGYQ4c92e2)
Supplement: supplementary_material [file Retail-Growth-Strategies-2023.docx]

# Personalized Retail Strategies for Growth

## Introduction

As we continue to expand our retail presence, it's crucial to leverage personalization to drive sales. This document explores the role of personalization in the retail industry, with a focus on its application at Lee's Market.

## Retail Landscape Evolution

As we continue to navigate the evolving retail landscape, it's clear that personalization is key to driving sales. Our findings show that 45% of our online customers have engaged with personalized product recommendations, resulting in a notable 25% increase in average order value. This underscores the importance of leveraging data to deliver targeted promotions and product suggestions, which can have a significant impact on customer loyalty and retention. By refining our approach to personalization, we can unlock new revenue streams and stay ahead of the competition.

## Customer Segmentation Strategies

Lee's Market has identified key customer demographics, including age, income, and shopping habits. Our analysis shows that 30% of customers are frequent shoppers, while 20% are occasional buyers. By understanding these segments, we can tailor our marketing efforts and improve customer loyalty. For instance, we can offer loyalty programs and personalized promotions to our frequent shoppers.

## Data-Driven Decision Making

Lee's Market has been implementing a data warehousing solution to streamline our business intelligence capabilities. This system provides real-time insights on sales, inventory, and customer behavior. By analyzing these metrics, we can optimize our supply chain, reduce waste, and improve operational efficiency. For example, our data shows that 40% of customers purchase on Fridays, indicating potential opportunities for targeted marketing.

## In-Store Experience Optimization

Lee's Market is upgrading our store layouts to better accommodate our expanding product range. We're also introducing a mobile checkout system to reduce wait times and improve the overall shopping experience. By analyzing customer feedback, we've identified areas for improvement, such as more prominent signage and enhanced navigation. These changes will enhance customer satisfaction and loyalty.

## Unlocking Personalization Potential

Lee's Market is exploring new ways to engage our customers through social media and email marketing campaigns. We're developing targeted promotions and exclusive offers to drive loyalty and increase sales. By leveraging our customer service team's expertise, we can better understand our customers' needs and preferences. For instance, we're piloting a program to provide personalized product recommendations to our loyalty program members.

## Conclusion

By implementing targeted personalization strategies, we can enhance the shopping experience, increase sales, and further establish Lee's Market as a leader in the Asian retail market. Next steps include refining our customer segmentation model and optimizing in-store experiences to maximize personalization benefits.
