# Supplementary material
Source: ML conference proceedings conference paper supplement (https://openreview.net/forum?id=IGYQ4c92e2)
Supplement: supplementary_material [file Retain-Talent-Strategies-2025.docx]

# Employee Retention Incentives Analysis Q1 2025

## Introduction

This report provides an overview of employee retention incentives issued during Q1 2025, highlighting key trends and insights to inform future HR strategies.

## Employee Retention Strategies and Initiatives

At Elexion Automotive, we've implemented a comprehensive employee wellness program, which has seen a 20% reduction in employee absenteeism. Our wellness program includes on-site fitness classes, mental health workshops, and access to on-site health services. Furthermore, we've established a mentorship program, pairing experienced employees with new hires to facilitate knowledge transfer and team building. These initiatives have boosted employee morale and job satisfaction.

## Compensation and Benefits Landscape Analysis

The automotive industry is experiencing a significant talent shortage, with a projected 15% increase in job vacancies by 2027. To address this, we've implemented a competitive compensation package, including a 10% merit-based bonus structure. Additionally, we've enhanced our benefits package to include a comprehensive health insurance plan, retirement matching, and paid time off. These measures have helped us attract and retain top talent.

## HR Metrics and KPIs for Q1 2025

In Q1 2025, our HR department reported a 12% increase in employee engagement, as measured by our quarterly employee survey. Additionally, we've seen a 5% decrease in employee turnover, thanks to our restructured onboarding process. Our HR metrics are closely monitored to ensure alignment with our company's strategic goals and objectives.

## Employee Feedback and Satisfaction Trends

Our quarterly employee feedback surveys have consistently shown a high level of satisfaction among our workforce, with an average rating of 4.5 out of 5. This is attributed to our collaborative work environment, opportunities for professional growth, and recognition programs. We continue to gather and act upon employee feedback to drive continuous improvement.

## Incentive Programs and Performance Metrics

To drive sales performance, we've implemented a territory-based sales incentive program, which has seen a 15% increase in sales volume. Our performance metrics are designed to align with our company's strategic goals, including revenue growth, customer satisfaction, and market share. These metrics are closely monitored to ensure accountability and drive business results.

## Conclusion

This report summarizes the key findings on employee retention incentives issued in Q1 2025, highlighting the importance of effective HR strategies in retaining top talent. Recommendations for future HR initiatives are provided.
