# Supplementary material
Source: ML conference proceedings conference paper supplement (https://openreview.net/forum?id=IGYQ4c92e2)
Supplement: supplementary_material [file RnD-Expense-Report.pdf › drbench/data/tasks/DR0015/files/qa_1755719848/RnD-Expense-Report.pdf]

# Q2 2024 Research and Development Expense Report

## Introduction

As we continue to drive innovation in the electric vehicle market, it's essential to monitor our research and development expenses. This report provides an overview of our R&D costs in Q2 2024, highlighting key areas of investment and opportunities for optimization. The purpose of this document is to inform strategic decision-making and ensure alignment with our company's sustainability goals. The following sections outline our R&D expenses in the context of our overall business strategy.

## Research and Development Investment Strategy Overview

Elexion Automotive's R&D investment strategy is centered around our goal of achieving 75% localization of EV components by 2026. This involves partnering with North American suppliers and investing in our in-house manufacturing capabilities. Our Advanced Manufacturing department has been working closely with the Procurement team to identify potential partners and assess their readiness to meet our production demands. As of June 2024, we have established partnerships with 15 new suppliers.

## Electric Vehicle Technology Advancements and Roadmap

Our EV technology roadmap is focused on improving battery efficiency and reducing charging times. In Q1 2024, our Engineering team completed a comprehensive review of emerging battery technologies, including solid-state batteries and lithium-air batteries. We are currently evaluating the feasibility of integrating these technologies into our existing product lines. Our goal is to achieve a 20% reduction in charging times by 2025.

## Q2 2024 R&D Expense Breakdown and Analysis

In Q2 2024, we conducted a thorough analysis of our R&D resource allocation to ensure alignment with our company-wide sustainability initiatives. Our analysis revealed opportunities for improvement in our testing and validation processes, which will enable us to reduce our environmental footprint. We are currently implementing changes to our testing procedures, which are expected to result in a 12% reduction in energy consumption by the end of 2024. Our Quality Assurance team is working closely with the R&D department to ensure a seamless transition.

## Cross-Border Compliance and Regulatory Considerations

Elexion Automotive is committed to ensuring compliance with all relevant regulatory requirements in the North American market. In Q2 2024, our Regulatory Affairs team conducted a comprehensive review of emerging regulations, including the USMCA and the Canadian Environmental Protection Act. We are currently working with our suppliers to ensure that all components meet the necessary regulatory requirements. As of June 2024, we have achieved 95% compliance with all relevant regulations.

## R&D Resource Allocation and Budget Planning

Our R&D resource allocation process involves a thorough evaluation of project proposals to ensure alignment with our company-wide goals. In Q2 2024, we received 25 project proposals from our R&D teams, which were evaluated based on their potential to drive innovation and growth. We are currently in the process of allocating resources to the selected projects, which are expected to commence in Q3 2024. Our goal is to achieve a 15% increase in R&D productivity by the end of 2024.

# Sustainability Initiatives and R&D Program Alignment

Elexion Automotive is committed to reducing its environmental footprint through sustainable R&D practices. In Q2 2024, our Sustainability team conducted a comprehensive review of our R&D programs to identify opportunities for improvement. We are currently implementing changes to our R&D processes, which are expected to result in a 10% reduction in waste generation by the end of 2024. Our goal is to achieve carbon neutrality in our R&D operations by 2026.

## Conclusion

In conclusion, our Q2 2024 R&D expenses reflect our commitment to driving innovation in the electric vehicle market. To optimize our R&D investments, we recommend prioritizing projects that align with our sustainability goals and regulatory requirements. By doing so, we can ensure our continued leadership in the industry while minimizing costs. Next steps include reviewing and revising our R&D budget plan to reflect these strategic priorities.
