# Supplementary material
Source: ML conference proceedings conference paper supplement (https://openreview.net/forum?id=IGYQ4c92e2)
Supplement: supplementary_material [file RnD-Report-Q2-2024.pdf › drbench/data/tasks/DR0013/files/qa_1755718551/RnD-Report-Q2-2024.pdf]

# Q2 2024 R&D Budget and Innovation Report

## Introduction

As we continue to drive innovation and growth in the electric vehicle market, it is essential to review our research and development (R&D) budget and its impact on our business. This report provides an overview of our R&D expenses, key projects, and initiatives in Q2 2024. The purpose of this document is to inform stakeholders of our R&D progress and provide recommendations for future investments. By analyzing our R&D budget, we can optimize our resources and accelerate the transition to zero-emission transportation.

## R&D Investment Strategy and Roadmap

Our R&D investment strategy is centered around aligning with emerging trends in electric vehicle technology. In 2023, we established a dedicated task force to monitor advancements in battery life and charging infrastructure. This task force has been instrumental in informing our product development roadmap, ensuring that our vehicles remain competitive in the North American market. As a result, we have seen a 25% increase in customer inquiries related to our upcoming models.

## Key Projects and Initiatives in Q2 2024

During Q2 2024, our engineering team collaborated with a leading university to develop a new lightweight materials testing protocol. This initiative aimed to reduce vehicle weight while maintaining safety standards, resulting in a potential 10% reduction in production costs. The project's success has sparked interest from other departments, with discussions underway to integrate the new materials into our production line. A total of 15 engineers were involved in the project, with a projected completion date of Q1 2025.

## R&D Expenses and Budget Allocation

Our accounting team has implemented a new expense tracking system to streamline R&D budget allocation. The system, which went live in Q1 2024, has reduced processing time by 30% and increased transparency across departments. As a result, we have seen a significant reduction in misallocated funds and an improvement in our ability to forecast future expenses. The system is currently being rolled out to other areas of the business.

## Innovation Metrics and Performance Indicators

To measure the success of our R&D initiatives, we track a range of key performance indicators (KPIs), including patent filings, peer-reviewed publications, and industry awards. In 2023, our team filed 12 patents related to electric vehicle technology, a 20% increase from the previous year. Additionally, our engineers published 5 papers in leading industry journals, further solidifying our position as a thought leader in the field. These metrics demonstrate our commitment to innovation and continuous improvement.

## Future R&D Opportunities and Recommendations

Looking ahead to 2025, we have identified several emerging trends in electric vehicle technology that present opportunities for growth and innovation. Our team is currently exploring the potential of advanced driver-assistance systems (ADAS) and vehicle-to-grid (V2G) technology. We anticipate that these areas will become increasingly important in the coming years and are developing strategies to integrate them into our product roadmap. A total of 5 new hires are planned to support this initiative.

## Conclusion

In conclusion, our R&D budget in Q2 2024 has been instrumental in driving innovation and growth at Elexion Automotive. By reviewing our R&D expenses and key projects, we can identify areas for improvement and optimize our resources for future investments. Based on our analysis, we recommend increasing our R&D budget in Q3 2024 to support new initiatives and accelerate the development of our electric vehicle technology. This will enable us to stay competitive in the market and achieve our sustainability goals.
