# Supplementary material
Source: ML conference proceedings conference paper supplement (https://openreview.net/forum?id=IGYQ4c92e2)
Supplement: supplementary_material [file Talent-Management-Insights-2025-Q1.docx]

# Talent Management Quarterly Insights Report

## Introduction

As we continue to grow and evolve, it is crucial to monitor and analyze our employee retention strategies. This report provides a comprehensive overview of our talent management initiatives, highlighting key trends and areas for improvement.

## Talent Acquisition Metrics Analysis

In Q4 2024, Lee's Market's talent acquisition team optimized our job posting strategy, resulting in a 25% increase in qualified candidate applications. We now receive an average of 150 applications per open position, allowing us to focus on more in-depth assessments. This shift has also enabled us to better track candidate source and effectiveness, enabling data-driven decisions for future recruitment efforts.

## Employee Engagement and Satisfaction

Lee's Market's recent employee engagement survey revealed that 85% of employees are satisfied with their job, with 60% reporting a sense of ownership and responsibility for their work. To further boost engagement, we've introduced a new recognition program, which has seen a 30% increase in employee nominations for peer-to-peer recognition. This initiative aims to foster a culture of appreciation and teamwork.

## Workforce Planning and Development

Lee's Market's workforce planning team is currently developing a comprehensive training program for new hires, focusing on onboarding and skills development. This initiative aims to reduce the time-to-productivity for new employees, ensuring a smoother transition into their roles. With the program's implementation, we expect to see a 20% reduction in training costs and a 15% increase in employee retention.

## HR Operational Efficiency

To streamline HR operations, Lee's Market has recently implemented an automated time-off request system, reducing the average time-to-approval by 50%. This change has enabled HR to focus on more strategic initiatives, such as talent development and employee engagement. The system's implementation has also led to a 25% reduction in HR-related queries to the help desk.

## Quarterly Employee Turnover Insights

Lee's Market's quarterly employee turnover report for Q4 2024 highlights a 5% decrease in total turnover rate compared to the same period last year. This trend is attributed to the success of our retention initiatives, including competitive compensation packages and employee recognition programs. However, the report also notes a concerning trend of turnover in our logistics department, which we're currently investigating and addressing proactively.

## Conclusion

This report serves as a valuable resource for HR and management teams, providing actionable insights to inform strategic decisions and drive business growth. We recommend reviewing the findings and implementing targeted initiatives to improve employee retention and overall organizational performance.
