# Supplementary material
Source: ML conference proceedings conference paper supplement (https://openreview.net/forum?id=IGYQ4c92e2)
Supplement: supplementary_material [file Telehealth-Digital-Presence-Strategy-2023.docx]

# Optimizing Digital Presence for Telehealth Providers

## Introduction

As the healthcare industry continues to shift towards digital-first solutions, it is crucial for telehealth providers like MediConn Solutions to establish a robust digital presence. This document will explore the critical elements of a successful digital presence and provide recommendations for optimizing our website and content marketing strategy.

## Building a Strong Online Reputation

Our analysis of Q3 2025 website traffic reveals that 30% of our online visitors are driven by organic search engine optimization. This finding highlights the critical importance of a robust digital presence, including a modern, mobile-optimized website and effective content marketing, to attract digital-first patients. As we continue to evolve our marketing strategy, it's essential to leverage these search engine optimization efforts to drive online engagement and conversion.

## Content Strategy for Digital-First Patients

To optimize our content marketing strategy, we've implemented a content calendar that outlines the types of content we'll be publishing, the frequency, and the target audience. This approach has allowed us to better plan and execute our content, resulting in a 25% increase in blog post views over the past quarter.

## The Role of User Experience in Telehealth

In our experience, user experience plays a crucial role in the success of our digital platforms. By incorporating user feedback and conducting regular usability testing, we've been able to improve the overall user experience, leading to a reduction in support tickets by 30% over the past year.

## Digital Marketing Trends in the Healthcare Industry

The healthcare industry has seen a significant shift towards digital marketing, with many providers adopting new technologies and strategies to reach their target audience. At MediConn Solutions, we're committed to staying at the forefront of these trends, investing in the latest marketing tools and training our team to ensure they're equipped to handle the demands of the digital landscape.

## Maximizing Online Visibility through SEO

To improve our website's search engine ranking, we've implemented a range of SEO strategies, including keyword research, on-page optimization, and link building. These efforts have resulted in a 40% increase in organic traffic over the past year.

## Creating a Comprehensive Digital Healthcare Ecosystem

Our team has been working on developing a comprehensive digital healthcare ecosystem that integrates our virtual healthcare services with other healthcare providers and organizations. This will enable seamless communication and data sharing between providers, improving patient care and outcomes.

## Conclusion

In conclusion, a robust digital presence is essential for telehealth providers to attract and retain digital-first patients. By implementing the recommendations outlined in this document, MediConn Solutions can establish itself as a leader in the telehealth industry and provide high-quality care to patients across Canada.
