# Supplementary material
Source: ML conference proceedings conference paper supplement (https://openreview.net/forum?id=IGYQ4c92e2)
Supplement: supplementary_material [file telehealth-digital-presence.pdf › drbench/data/tasks/DR0010/files/qa_1755706352/telehealth-digital-presence.pdf]

# Optimizing Digital Presence for Telehealth Success

## Introduction

As a leader in virtual healthcare services, MediConn Solutions recognizes the importance of a robust digital presence in attracting and retaining patients. This document outlines key considerations for optimizing our website and content marketing strategy to meet the evolving needs of digital-first patients. By leveraging industry best practices and emerging trends, we can enhance our online visibility, drive engagement, and ultimately drive business growth. This report provides actionable insights and recommendations for our marketing team to inform our digital strategy.

## Assessing the Competitive Landscape in Telehealth

As we analyze our digital presence, our Q3 2025 data indicates that MediConn Solutions' average search engine ranking position for key telehealth-related terms stands at 4.8. This suggests that while we have made strides in improving our visibility, there remains room for growth to increase our online footprint and attract more digital-first patients. Enhancing our SEO strategy will be crucial in driving organic search traffic and establishing ourselves as a trusted and convenient care option. A focused approach to content marketing and optimization will enable us to rise through the rankings, ultimately driving more conversions and bookings through our platform.

## Emerging Trends in Digital Patient Engagement

Our patient engagement team has been exploring the potential of gamification in healthcare, with a focus on increasing medication adherence. In a recent pilot study, we found that 60% of participants reported improved adherence rates when using a mobile app with gamified elements. While still in its early stages, this research has promising implications for patient outcomes. As we move forward, we will continue to assess the feasibility of integrating gamification into our platform.

## Key Performance Indicators for Measuring Online Success

In 2020, our IT department implemented a new project management tool, which has resulted in a 30% reduction in website update deployment time. This increased efficiency has enabled our development team to focus on more complex projects. To further optimize our processes, we will be conducting a review of our DevOps pipeline in Q3 2023. By streamlining our development workflow, we aim to improve overall platform stability.

## Optimizing Website Design for Patient Experience

As part of our corporate social responsibility initiative, we launched a redesigned careers page in January 2022, highlighting our company culture and values. This update has led to a 25% increase in job applications from candidates who share our mission. Our HR team is now working on developing a more comprehensive employer brand strategy, which will include employee testimonials and community outreach programs.

## Content Marketing Strategies for Telehealth Providers

Our sales team has been leveraging our content library to support their outreach efforts, with a focus on educating potential clients about the benefits of telehealth. In Q1 2023, we saw a 15% increase in sales-qualified leads generated through content sharing. To further amplify our sales enablement strategy, we will be developing targeted content packages for key decision-makers in the healthcare industry.

# Conclusion

In conclusion, a well-designed digital presence is crucial for telehealth providers like MediConn Solutions to attract and retain patients. By understanding the competitive landscape, leveraging emerging trends, and optimizing our website and content marketing strategy, we can drive business growth and establish ourselves as a leader in the virtual healthcare industry. The recommendations outlined in this report provide a roadmap for our marketing team to enhance our online presence and achieve our business objectives. Next steps include conducting a thorough analysis of our current digital presence and developing a comprehensive plan to implement the strategies outlined in this report.
