# Supplementary material
Source: ML conference proceedings conference paper supplement (https://openreview.net/forum?id=IGYQ4c92e2)
Supplement: supplementary_material [file telehealth-digital-presence.pdf › drbench/data/tasks/DR0010/files/qa_1755710971/telehealth-digital-presence.pdf]

# Optimizing Digital Presence for Telehealth Success

## Introduction

As a leader in virtual healthcare services, MediConn Solutions recognizes the importance of a robust digital presence in attracting digital-first patients. This document outlines key considerations for enhancing our online visibility and content marketing strategy to drive business growth. By examining industry trends and best practices, we can refine our approach to better meet the evolving needs of our patients. This analysis aims to inform our marketing efforts and position MediConn Solutions for continued success in the telehealth market.

## Assessing the Competitive Landscape of Virtual Healthcare

As we navigate the competitive landscape of virtual healthcare, a critical component of our digital presence is search engine optimization (SEO). In Q4 2025, we have allocated a significant budget of \$120,000 to enhance our online visibility, ensuring that our services appear prominently in search results for digital-first patients. This strategic investment will enable us to better compete with other telehealth providers, increase our online footprint, and drive more traffic to our website. By prioritizing SEO, we can improve our chances of attracting new patients who value convenience and speed in their healthcare experience. By doing so, we can further establish MediConn Solutions as a leader in the virtual healthcare industry.

## Key Performance Indicators for Telehealth Website Optimization

In our latest IT audit, we discovered that 40% of our website's backend infrastructure was upgraded in the past 12 months, resulting in a 30% reduction in page load times. Our development team has prioritized optimizing server response times, aiming for a sub-200ms average by Q4 2023. Furthermore, we've integrated Google Tag Manager to streamline tracking and analytics, enabling more accurate A/B testing and experimentation. These technical improvements will support our broader business objectives, including enhanced customer satisfaction.

## Content Marketing Strategies for Patient Engagement and Retention

Our marketing team has collaborated with the Medical Affairs department to develop a series of case studies highlighting successful patient outcomes. Since launching this initiative in October 2022, we've published 12 case studies, which have collectively garnered over 5,000 downloads. Notably, 75% of these downloads came from healthcare professionals, indicating a strong interest in our expertise. This collaboration has not only enhanced our content library but also fostered a closer working relationship between marketing and medical teams.

## Conclusion

By understanding the critical elements of a robust digital presence, we can optimize our website and content marketing strategy to attract digital-first patients and drive business growth. Our analysis highlights the importance of a patient-centric approach, seamless user experience, and targeted content marketing efforts. To capitalize on these insights, we recommend refining our website design, investing in search engine optimization, and developing content that addresses the unique needs of our patient population. By implementing these strategies, we can enhance our online visibility, drive patient engagement, and reinforce our position as a leader in the telehealth industry.
