# Supplementary material
Source: ML conference proceedings conference paper supplement (https://openreview.net/forum?id=IGYQ4c92e2)
Supplement: supplementary_material [file telehealth-digital-strategy.pdf › drbench/data/tasks/DR0010/files/qa_1755711234/telehealth-digital-strategy.pdf]

# Optimizing Digital Presence for Telehealth Success

## Introduction

As a leader in virtual healthcare services, MediConn Solutions recognizes the importance of a robust digital presence in attracting digital-first patients. This document aims to provide an overview of key strategies and recommendations for enhancing our website and content marketing efforts. By leveraging industry best practices and market research, we can improve our online visibility and establish ourselves as a trusted provider of telehealth services. This report is intended to inform our marketing strategy and guide future initiatives.

## The Role of Personalization in Patient Engagement Strategies

Our patient engagement team has been exploring the use of personalized email campaigns to improve patient retention rates. In a pilot study conducted in January 2023, we saw a 15% increase in email open rates when using personalized subject lines. However, we also noticed that the use of personalized content did not significantly impact the overall patient satisfaction ratings. As a result, we are re-evaluating our approach to personalization and exploring new strategies to improve patient engagement.

## Key Elements of an Effective Telehealth Website Experience

MediConn Solutions' IT department has been working on upgrading our website's infrastructure to improve its overall performance. The project, which began in October 2022, aims to reduce the website's loading time by 30% and improve its mobile responsiveness. Our development team has been working closely with the design team to ensure a seamless user experience across all devices. The project is expected to be completed by the end of Q3 2023.

## Measuring the ROI of Digital Marketing Initiatives in Healthcare

Our marketing team has been using Google Analytics to track the performance of our digital marketing campaigns. In Q1 2023, we saw a 20% increase in website traffic from social media channels, resulting in an additional 100 leads per month. However, we also noticed that the conversion rate from lead to customer was lower than expected, at around 5%. As a result, we are adjusting our marketing strategy to focus on higher-converting channels.

## Assessing the Competitive Landscape of Virtual Healthcare

Our Q1 2025 social media performance metrics reveal a promising trend in patient engagement, with 8% of our audience actively interacting with telehealth-related content. This uptick in engagement not only underscores the importance of a robust online presence but also highlights the need to continue optimizing our content marketing strategy to effectively reach and retain digital-first patients. By leveraging these insights, we can refine our approach to create more targeted and impactful campaigns that drive patient acquisition and ultimately support business growth. Furthermore, analyzing our social media engagement patterns will enable us to identify areas of improvement and adjust our strategy to stay competitive in the virtual healthcare landscape.

## Conclusion

In conclusion, a well-designed digital presence is crucial for attracting and retaining digital-first patients. By prioritizing website optimization, content marketing, and personalization, we can improve our online visibility and drive business growth. The recommendations outlined in this report will inform our

marketing strategy and guide future initiatives. By implementing these strategies, we can solidify our position as a leader in the virtual healthcare industry.
