# Supplementary material
Source: ML conference proceedings conference paper supplement (https://openreview.net/forum?id=IGYQ4c92e2)
Supplement: supplementary_material [file telehealth-digital-strategy.pdf › drbench/data/tasks/DR0010/files/qa_1755711331/telehealth-digital-strategy.pdf]

# Optimizing Digital Presence for Telehealth Success

## Introduction

As a leader in virtual healthcare services, MediConn Solutions recognizes the importance of a robust digital presence in attracting digital-first patients. This document aims to explore key elements of a successful online strategy, providing insights and recommendations for improvement. Our goal is to establish MediConn Solutions as a trusted and accessible healthcare provider, leveraging our digital platforms to enhance patient engagement and outcomes. By optimizing our website and content marketing approach, we can effectively reach and serve the evolving needs of our target audience.

## Key Performance Indicators for Digital Patient Engagement

In 2023, our customer success team reported a 90% client retention rate, exceeding our projected target by 5%. This achievement is a testament to our dedication to delivering exceptional customer service and personalized support. We've also seen a significant reduction in patient wait times, with an average wait time of 5 minutes for virtual appointments. By prioritizing operational efficiency, we can continue to drive business growth and patient satisfaction.

## Assessing the Competitive Landscape of Telehealth Providers

Our Q2 2025 content marketing performance demonstrates a strong foundation for attracting digital-first patients. Notably, our blog drew a considerable audience, with a total of 15,000 unique visitors during this period. This uptick in engagement underscores the effectiveness of our content strategy in resonating with our target demographic. By creating informative, engaging content that addresses the needs and concerns of our audience, we can continue to establish MediConn Solutions as a trusted and authoritative voice in the virtual healthcare space. As we move forward, refining our content approach to better cater to the evolving preferences of digital-first patients will be crucial in driving continued growth and conversion.

## Strategic Content Creation for Enhanced Online Visibility

Our content marketing team has been collaborating with the HR department to develop an employee advocacy program, which aims to amplify our brand's online presence through employee-generated content. Since its launch in January 2023, the program has seen a 40% increase in employee participation, resulting in a notable spike in social media engagement. By empowering our employees to become brand ambassadors, we can expand our reach and build a stronger online community. This initiative has also helped to foster a culture of employee engagement and advocacy within our organization.

## Conclusion

In conclusion, a well-designed digital presence is crucial for telehealth providers like MediConn Solutions to attract and retain digital-first patients. By understanding our competitive landscape, tracking key performance indicators, and creating strategic content, we can optimize our online platforms to meet the evolving needs of our target audience. Our next steps will involve conducting a thorough website audit, refining our content marketing strategy, and monitoring our progress through regular analytics reviews. By doing so, we can enhance our online visibility, drive patient engagement, and ultimately drive business growth.
