# Supplementary material
Source: ML conference proceedings conference paper supplement (https://openreview.net/forum?id=IGYQ4c92e2)
Supplement: supplementary_material [file the_art_of_italian_sauces.pdf › services/drbench_tools/src/data/users/susan.smith/nextcloud/Documents/Templates/the_art_of_italian_sauces.pdf]

# The Art of Italian Sauces: A Culinary Exploration

John Doe

October 2023

## 1 Introduction

Italian cuisine is renowned for its rich flavors and diverse ingredients, and at the heart of this culinary tradition lies the art of sauce-making. This document explores various Italian sauces, their historical significance, and their integral role in enhancing pasta dishes. It aims to provide culinary enthusiasts with insights into the creation of authentic sauces that can elevate any pasta meal.

## 2 Historical Overview of Italian Sauces

The roots of Italian sauces can be traced back to the Roman Empire, where basic combinations of herbs and oil were used to flavor meals. Over the centuries, these simple mixtures evolved into the complex sauces we know today. Notable examples include:

- **Pesto:** Originating from Genoa, this sauce blends basil, garlic, pine nuts, Parmesan cheese, and olive oil.
- **Marinara:** A classic tomato-based sauce that has been a staple in Italian households since the 19th century.
- **Bolognese:** A rich meat sauce from Bologna that combines ground meat, tomatoes, and a variety of vegetables.

## 3 The Role of Sauces in Italian Cuisine

Sauces not only provide flavor but also contribute to the overall experience of dining. They can transform a simple pasta dish into a gourmet meal. According to a study conducted by the Italian Culinary Institute, nearly 70% of pasta dishes served in restaurants are paired with a sauce, highlighting the importance of this culinary art.

### 3.1 Types of Italian Sauces

There are two main categories of sauces in Italian cuisine:

1. **Emulsified Sauces:** These sauces, such as aioli or vinaigrette, are created by mixing oil with other ingredients, resulting in a creamy texture.
2. **Reduction Sauces:** These are made by simmering ingredients to concentrate flavors, such as a classic marinara or a wine reduction sauce.

## 4 Creating Your Own Sauces

Creating authentic Italian sauces at home can be an enjoyable and rewarding experience. Here are a few essential recipes:

### 4.1 Recipe 1: Classic Marinara Sauce

- Ingredients: 2 cans of whole tomatoes, 4 cloves of garlic, 1 onion, 1 teaspoon of oregano, olive oil, salt, and pepper.
- Instructions:
  1. Sauté chopped onion and garlic in olive oil until translucent.
  2. Add tomatoes, oregano, salt, and pepper. Simmer for 30 minutes.
  3. Blend sauce until smooth and serve over pasta.

### 4.2 Recipe 2: Pesto alla Genovese

- Ingredients: 2 cups of fresh basil leaves, 1/2 cup of grated Parmesan, 1/2 cup of olive oil, 1/3 cup of pine nuts, and 2 cloves of garlic.
- Instructions:
  1. In a food processor, combine basil, garlic, and pine nuts. Blend until finely chopped.
  2. Gradually add olive oil and Parmesan until a smooth paste forms.
  3. Serve with your favorite pasta.

## 5 Visualizing Sauce Popularity

To further understand the popularity of various sauces, we can visualize their consumption trends over the past few decades. The following graph illustrates the growth in popularity of different Italian sauces:

Italian Culinary Institute. (2022). *The Role of Sauces in Italian Cuisine*.

Smith, A. (2020). *The History of Italian Sauces*. Rome: Culinary Press.
