# Supplementary material
Source: ML conference proceedings conference paper supplement (https://openreview.net/forum?id=IGYQ4c92e2)
Supplement: supplementary_material [file Training-Budget-Report-2025.docx]

# Training Budget Report - Q1 2025 Insights

## Introduction

This report provides an overview of the training budget allocated for our customer service representatives in Q1 2025. The purpose of this document is to analyze the departmental training expenses and identify areas for improvement. As a key member of the Elexion Automotive team, it is essential to understand the training budget to ensure effective employee development and customer satisfaction. This report aims to provide valuable insights for our stakeholders.

## Training Expenditure Analysis

In recent years, Elexion Automotive has seen a significant increase in training expenditures due to the expansion of our manufacturing facilities. This growth has led to new training programs and protocols to ensure the upskilling of our workforce. As of Q4 2024, we have invested $200,000 in training and development, a 15% increase from the previous year. This increase is attributed to the addition of new production lines and the need for more advanced training for our team members.

## Customer Service Representative Onboarding

Elexion Automotive's customer service representatives undergo a comprehensive onboarding program, which includes both theoretical and practical training. This program is designed to equip our representatives with the necessary skills to effectively handle customer inquiries and concerns. The onboarding process typically takes around 6-8 weeks, depending on the representative's prior experience and the level of support required. Upon completion of the program, representatives are expected to demonstrate a high level of proficiency in our product offerings and customer service protocols.

## Departmental Training Objectives

The objectives of our departmental training programs are designed to enhance the skills and knowledge of our employees, thereby improving overall performance and job satisfaction. Our training objectives are aligned with our company's strategic goals and are regularly reviewed and updated to ensure they remain relevant and effective. In Q3 2024, we launched a new training initiative focused on improving quality control, which has resulted in a significant reduction in defects and an increase in customer satisfaction.

## Training Budget Allocation Breakdown

Elexion Automotive's training budget is allocated across various departments, including manufacturing, sales, and customer service. The allocation of our training budget is based on business needs and priorities, with a focus on ensuring that our employees have the necessary skills and knowledge to excel in their roles. As of Q2 2024, our training budget allocation breakdown is as follows: 40% for manufacturing, 30% for sales, and 30% for customer service.

## Quarterly Training Budget Review

Elexion Automotive conducts a quarterly review of our training budget to ensure that it remains aligned with our business objectives and priorities. This review includes a thorough analysis of our training expenditure, an assessment of our training programs' effectiveness, and a review of our training budget allocation. The results of this review are used to inform our training strategy and ensure that our training programs are aligned with our company's overall goals and objectives.

## Conclusion

In conclusion, this report highlights the importance of effective training for our customer service representatives. The training budget allocated for Q1 2025 has been analyzed to identify areas for improvement. Recommendations for future training initiatives and budget allocation will be provided in subsequent reports. This report serves as a foundation for our ongoing efforts to enhance customer satisfaction and employee development within Elexion Automotive.
