# Supplementary material
Source: ML conference proceedings conference paper supplement (https://openreview.net/forum?id=IGYQ4c92e2)
Supplement: supplementary_material [file training-development-report.pdf › drbench/data/tasks/DR0011/files/qa_1755713681/training-development-report.pdf]

# Q2 2025 Training and Development Report

## Introduction

As we continue to drive innovation in the electric vehicle industry, investing in our employees' growth and development remains a top priority. This report provides an overview of our training initiatives in Q2 2025, highlighting key areas of focus and opportunities for improvement. The insights presented in this document will inform our strategic planning for future training programs, ensuring alignment with our company's goals and objectives. By analyzing our training efforts, we can optimize our approach to employee development and drive business success.

## Employee Engagement and Participation Trends

Our employee ambassador program, launched in Q1 2024, has shown a significant increase in participation rates among our manufacturing teams. Notably, 85% of ambassadors reported improved communication with their department heads, and 70% cited increased job satisfaction. As of March 2025, the program has expanded to include 120 ambassadors across 10 departments. We expect this growth to continue, with a projected 20% increase in participation by the end of 2025.

## Training Program Effectiveness and ROI Analysis

Our analysis of industry benchmarks reveals that companies investing in digital transformation initiatives see an average ROI of 25% within the first two years. In response, we have allocated \$1.2 million to upgrade our training infrastructure, including the adoption of AI-powered learning platforms. This investment is expected to yield long-term cost savings and improve our competitiveness in the market. By 2026, we anticipate a 15% reduction in training-related expenses.

## Workforce Development and Compliance Initiatives

As part of our ongoing commitment to cross-border compliance, we have established a dedicated task force to monitor regulatory updates and ensure seamless integration into our operations. This team has successfully implemented a compliance training module for new hires, resulting in a 30% reduction in onboarding time. Furthermore, our partnerships with industry associations have enabled us to stay ahead of emerging trends and best practices. We are confident that our proactive approach will continue to drive business growth and minimize risk.

## Conclusion

In conclusion, our Q2 2025 training initiatives have shown promising results, with notable increases in employee engagement and participation. To build on this momentum, we recommend allocating additional resources to high-impact training programs and exploring new opportunities for workforce development. By doing so, we can enhance our employees' skills and knowledge, drive business growth, and maintain our competitive edge in the electric vehicle market. Future reports will continue to monitor our progress and provide actionable insights for strategic decision-making.
