# Supplementary material
Source: ML conference proceedings conference paper supplement (https://openreview.net/forum?id=IGYQ4c92e2)
Supplement: supplementary_material [file training-expenditure-analysis-2025.docx]

# 2025 Q2 Training Expenditure Analysis

## Introduction

This report provides an overview of our training budget allocation for the second quarter of 2025, aiming to ensure transparency and accountability within our virtual healthcare services.

## Training Program Initiatives

As part of our ongoing commitment to employee development, we have launched a new mentorship program, pairing experienced healthcare professionals with new hires to facilitate knowledge sharing and skill transfer. This initiative aims to enhance our team's overall expertise and contribute to the company's growth. We have also introduced a training module on effective communication strategies, focusing on active listening and clear articulation of complex medical concepts. By fostering a culture of continuous learning, we strive to maintain the highest standards of patient care and support.

## Staff Development Strategies

To ensure our staff remains up-to-date with the latest advancements in the field, we have implemented a quarterly review process, where team members are required to present a case study or share a new technique they have learned. This approach encourages collaboration, critical thinking, and continuous professional growth. Furthermore, we have established a peer-to-peer learning network, allowing staff to share knowledge and best practices. By investing in our team's development, we aim to maintain our competitive edge in the virtual healthcare market.

## Compliance and Security Considerations

As a healthcare organization, we take the security and compliance of our digital platforms extremely seriously. We have implemented a robust risk management framework, which includes regular security assessments and penetration testing. Our IT team works closely with our compliance department to ensure that all systems and processes meet the relevant regulatory requirements. By prioritizing security and compliance, we can maintain the trust of our patients and partners.

## Budget Allocation Insights

Our budget allocation process is designed to ensure that resources are allocated efficiently and effectively. We have established clear budgeting guidelines, which outline the allocation of funds across various business units. This approach enables us to track expenses, identify areas for cost optimization, and make informed decisions about future investments. By maintaining a transparent and accountable budgeting process, we can ensure the long-term sustainability of our organization.

## Conclusion

This analysis highlights the importance of strategic training budget allocation for our virtual healthcare services, enabling us to provide high-quality care while ensuring compliance and security standards. Next steps include monitoring training program effectiveness and identifying areas for improvement.
