# Supplementary material
Source: ML conference proceedings conference paper supplement (https://openreview.net/forum?id=IGYQ4c92e2)
Supplement: supplementary_material [file Training-Expenditure-Q3-2024.docx]

# Training Expenditure Analysis Q3 2024

## Introduction

As we continue to invest in our employees' skills, it's essential to monitor our training budget to ensure alignment with our sustainability goals. This report provides an overview of our training expenditure for the third quarter of 2024, shedding light on areas of improvement and opportunities for growth.

## Training Program Cost Allocation

Our training program is designed to promote cross-functional collaboration, with a focus on role-based learning and scenario-based exercises. This approach has resulted in a 25% reduction in training costs and a 30% increase in knowledge sharing among departments. The program has been well-received by employees, with 85% reporting improved job performance and a 90% satisfaction rate. The next phase of the program will focus on virtual reality training simulations for improved retention.

## Employee Development Initiatives

Our employee development initiatives are designed to foster a culture of innovation and continuous learning. This includes mentorship programs, skill assessments, and access to industry-leading conferences and workshops. Our latest initiative, the 'Elexion Academy,' has seen a 50% increase in employee participation and a 20% reduction in turnover rates. This program is essential for developing the skills needed to drive our company's growth strategy.

## Budget Impact Analysis

A recent analysis of our budget revealed that 12% of our expenses are dedicated to employee development. This allocation has been consistent over the past three years, despite changes in our product lines and market conditions. The impact of this allocation on our bottom line is significant, with a 15% increase in employee productivity and a 10% reduction in training costs. We will continue to monitor this trend to ensure alignment with our company's goals.

## Quarterly Spending Breakdown

Our quarterly spending breakdown for Q2 2024 showed a significant increase in IT expenses, driven by the implementation of a new enterprise resource planning system. This system will improve our supply chain management, reduce inventory costs, and enhance our ability to respond to changing market conditions. The total IT expense for Q2 2024 was $1.2 million, a 20% increase from the previous quarter. This investment will have a direct impact on our company's competitiveness and profitability.

## Conclusion

In conclusion, our training expenditure for Q3 2024 is a vital component of our overall strategy. This report highlights the importance of tracking our spending to ensure optimal resource allocation. Recommendations for future training initiatives and budget adjustments are provided to support our continued growth and commitment to sustainability.
