# Supplementary material
Source: ML conference proceedings conference paper supplement (https://openreview.net/forum?id=IGYQ4c92e2)
Supplement: supplementary_material [file training-insights-report.pdf › drbench/data/tasks/DR0001/files/DI004_pdf/training-insights-report.pdf]

# Q3 2024 Training and Development Insights Report

## Introduction

As we continue to expand our operations across the U.S. and Canada, it is essential that we prioritize employee development to drive business success. This report provides an overview of our training initiatives in Q3 2024, highlighting key trends and areas for improvement. The insights presented in this report will inform our training strategy for the remainder of the year. By investing in our employees, we can enhance customer satisfaction and drive revenue growth.

## Employee Engagement and Retention Strategies

Lee's Market has implemented various employee engagement initiatives, including quarterly town hall meetings and departmental social events, resulting in a 25% increase in employee satisfaction ratings since Q2 2023. Our retention strategies focus on providing competitive compensation packages and opportunities for professional growth, with a notable 15% reduction in turnover rates among management staff. To further enhance employee experience, we plan to launch an employee recognition program in Q1 2025, acknowledging outstanding performance and contributions. This program is expected to boost morale and motivation across the organization.

## Training Program ROI Analysis and Recommendations

Our analysis of training program ROI revealed a significant impact on sales performance, with a 10% increase in average transaction value among employees who completed the 'Asian Food and Culture' training module. We recommend expanding this program to include more modules focused on customer service and product knowledge, aiming to enhance overall customer experience. Additionally, we plan to introduce a new training evaluation framework in Q2 2025, enabling more accurate assessments of program effectiveness. This will inform future training investments and optimize resource allocation.

## Quarterly Training Hours per Employee Overview

Lee's Market has been exploring innovative training delivery methods, including gamification and microlearning platforms, to cater to diverse learning styles and preferences. A recent pilot program involving 100 employees demonstrated a 20% increase in knowledge retention rates compared to traditional training methods. We plan to integrate these new approaches into our existing training curriculum, enhancing employee engagement and knowledge acquisition. This initiative will be rolled out in phases, starting with the customer service team in Q1 2025.

## New Hire Onboarding Process Evaluation

Our evaluation of the new hire onboarding process revealed a significant reduction in time-to-productivity, with 80% of new hires achieving full productivity within 6 weeks of joining the company. We attribute this success to the implementation of a comprehensive onboarding program, which includes a dedicated onboarding specialist, interactive training sessions, and regular check-ins with management. To further enhance the onboarding experience, we plan to introduce a buddy system, pairing new hires with experienced employees for guidance and support.

## Future Training and Development Initiatives

Lee's Market is committed to investing in employee development, with a planned 20% increase in training budget for 2025. We will be introducing new training programs focused on leadership

development, digital literacy, and data analysis, aiming to enhance employee skills and knowledge in key areas. Additionally, we plan to launch a mentorship program, pairing high-potential employees with senior leaders for guidance and coaching. This initiative will support succession planning and talent development across the organization.

## **Conclusion**

In conclusion, our Q3 2024 training initiatives have shown promising results, with opportunities for further growth and improvement. To drive business success, we must continue to invest in our employees and prioritize their development. Based on the insights presented in this report, we will refine our training strategy to enhance employee engagement and retention. By doing so, we can improve customer satisfaction and drive revenue growth.
