# Supplementary material
Source: ML conference proceedings conference paper supplement (https://openreview.net/forum?id=IGYQ4c92e2)
Supplement: supplementary_material [file Training-Metrics-Q1-2025.docx]

# Quarterly Training Metrics Report - Q1 2025

## Introduction

This report provides an overview of our employee training initiatives, highlighting key trends and insights for the first quarter of 2025.

## Training Program Overview

Our comprehensive training program is designed to equip our healthcare professionals with the latest knowledge and skills in virtual healthcare. With a focus on compliance and patient-centricity, our training sessions are conducted by experienced trainers and cover a range of topics, from HIPAA compliance to patient engagement strategies. Our training program is divided into modules, with regular assessments to ensure participants are meeting the expected standards. By the end of Q1 2025, we expect to have trained over 80% of our healthcare professionals.

## Quarterly Training Hours Trends

Our quarterly training hours trends reveal an interesting pattern, with a significant increase in training hours during the first quarter of 2024, followed by a slight decline in the subsequent quarters. This trend is attributed to the introduction of new training modules and the need for healthcare professionals to stay updated on the latest industry developments. By analyzing these trends, we can better understand the training needs of our healthcare professionals and make informed decisions about future training programs.

## Employee Engagement Strategies

To boost employee engagement, we have introduced various strategies, including regular feedback sessions, mentorship programs, and opportunities for professional development. Our efforts have resulted in a 25% increase in employee satisfaction, as measured by our quarterly surveys. We plan to continue refining these strategies to better support our healthcare professionals in their roles.

## Training Budget Allocation

Our training budget allocation is carefully planned to ensure that we are making the most effective use of our resources. We allocate a significant portion of our budget to training and development, with a focus on virtual healthcare topics. By the end of Q1 2025, we expect to have allocated over 30% of our budget to training and development.

## Training Needs Assessment Results

Our training needs assessment results have identified a significant need for training on patient engagement strategies and HIPAA compliance. These results will inform our training program and ensure that we are meeting the needs of our healthcare professionals. By the end of Q1 2025, we expect to have completed the assessment and will use the results to refine our training programs.

## Employee Training Outcomes

Our employee training outcomes have been impressive, with a 95% pass rate on our training modules. This is a testament to the effectiveness of our training programs and the dedication of our healthcare professionals. We plan to continue monitoring and evaluating the outcomes of our training programs to ensure that they are meeting the needs of our healthcare professionals.

## Conclusion

In conclusion, our quarterly training metrics report provides valuable insights into our employee training programs, enabling data-driven decision-making and informed budget allocation. We recommend reviewing training program effectiveness and implementing targeted strategies to optimize employee performance and engagement.
