# Supplementary material
Source: ML conference proceedings conference paper supplement (https://openreview.net/forum?id=IGYQ4c92e2)
Supplement: supplementary_material [file Training_Materials_Employee_Development.pdf › services/drbench_tools/src/data/users/susan.smith/nextcloud/Reports/Training Materials/Training_Materials_Employee_Development.pdf]

# Training Materials for Employee Development

John Doe

April 10, 2025

## 1 Introduction

In the ever-evolving food industry, training employees effectively is crucial for maintaining high standards and ensuring customer satisfaction. This document aims to provide training materials designed for employees at Great Pasta. It encompasses various modules, including product knowledge, customer service excellence, and operational efficiency. The training materials are intended for new hires and existing employees seeking to refine their skills in alignment with our mission: "To provide the best pasta in the world and make it accessible to everyone."

## 2 Product Knowledge

Understanding the products we offer is fundamental for all employees. Great Pasta prides itself on the quality of its products, which include a variety of pasta shapes and sauces. A comprehensive knowledge of these products allows employees to better assist customers and promote our offerings.

### 2.1 Types of Pasta

Great Pasta offers over 50 types of pasta. Some popular varieties include:

- Spaghetti
- Penne
- Fusilli

### 2.2 Pasta Production Process

The production of pasta is a meticulous process that involves selecting high-quality durum wheat, mixing it with water, and extruding it into various shapes. The following diagram illustrates the production process:

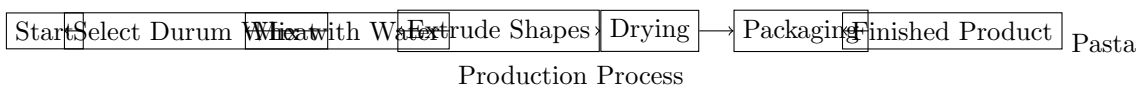

## 3 Customer Service Excellence

Excellent customer service is essential for retaining customers and fostering loyalty. Employees should be trained to handle inquiries, complaints, and product suggestions effectively.

### 3.1 Communication Skills

Effective communication involves active listening and responding to customer needs. Here are some key points:

- Greet customers warmly.
- Listen to customer inquiries and feedback.
- Provide clear information about products and services.

## 3.2 Handling Complaints

When customers express dissatisfaction, employees should:

- Remain calm and empathetic.
- Apologize for any inconvenience.
- Offer solutions or alternatives.

## 4 Operational Efficiency

Operational efficiency is vital for maintaining quality and reducing costs. Training should cover the following topics:

- Inventory Management
- Equipment Usage
- Health and Safety Protocols

### 4.1 Inventory Management

Employees should understand how to track inventory levels, reorder supplies, and minimize waste. The following chart illustrates the inventory turnover rates for different products:

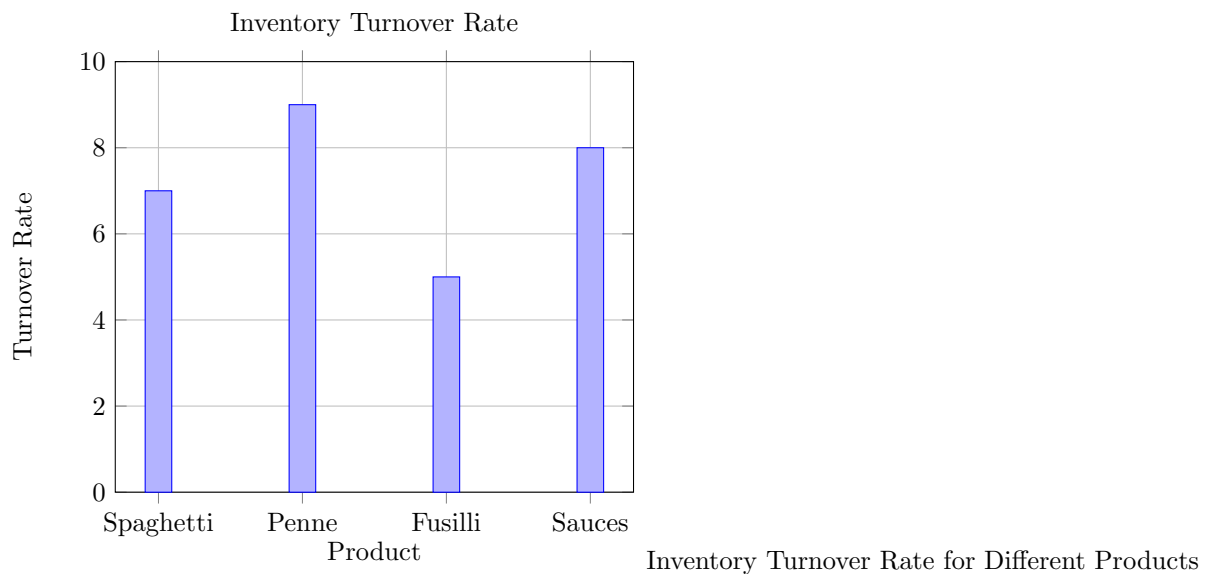

## 5 Conclusion

Training is a vital component of employee development at Great Pasta. By equipping employees with the necessary knowledge and skills, we ensure that our mission is upheld. Continuous learning and improvement will help us maintain our position as the provider of the best pasta in the world.

## 6 References

1. Great Pasta Internal Training Manual
2. Food Industry Standards Report, 2023
