# Supplementary material
Source: ML conference proceedings conference paper supplement (https://openreview.net/forum?id=IGYQ4c92e2)
Supplement: supplementary_material [file Trust-Enhancing-Support-Strategies.docx]

# Boosting Customer Trust through Proactive Support

## Introduction

As our customer base continues to grow, it's essential to ensure that our after-sales support meets the highest standards. This document explores strategies for enhancing customer trust while balancing efficiency and cost-effectiveness.

## Customer Feedback Analysis

Our customer feedback analysis has shown that the majority of our customers are satisfied with our product, with 92% of respondents stating that they would recommend Elexion Automotive to friends and family. While we are proud of this achievement, we recognize that there is always room for improvement. We will continue to gather and analyze customer feedback to identify areas for growth and development. In the past year, we have implemented changes based on customer feedback, such as the addition of new features to our vehicle's infotainment system.

## Service Level Agreement Optimization

Elexion Automotive has seen significant growth in the past year, with our vehicle sales increasing by 30%. To ensure that we can continue to meet the needs of our customers, we are reviewing our service level agreements to identify areas for optimization. This includes streamlining our maintenance schedules and improving our inventory management processes. By doing so, we can reduce wait times and improve overall customer satisfaction.

## Assessing Current Support Channels

Our analysis of the total cost of providing after-sales support to our enterprise customers in Q1 2025 revealed some interesting trends. The toal cost in Q1 2025 was $375,000. Notably, North America accounted for 60% of the total cost, highlighting the importance of tailoring our support strategies to this region. Furthermore, software updates made up 30% of the total cost, underscoring the need for efficient and cost-effective solutions in this area. These findings have significant implications for our customer service team, as they will be crucial in informing our decisions on resource allocation and cost optimization.

## Employee Empowerment for Enhanced Care

Elexion Automotive is committed to empowering our employees to provide exceptional customer care. We have implemented a comprehensive training program, which includes modules on customer service, product knowledge, and conflict resolution. Our employees are also provided with the latest technology and tools to assist them in their daily tasks. In the past year, we have seen a significant decrease in customer complaints, which we attribute to the excellent service provided by our employees.

## Compliance with Industry Standards

Elexion Automotive is committed to compliance with industry standards, including those related to quality, safety, and environmental sustainability. We have implemented a robust quality control process, which includes regular audits and testing to ensure that our vehicles meet the highest standards. Our commitment to compliance is reflected in our ISO 9001 certification, which we have held since 2015.

## Strategic Insights for Trust Enhancement

Elexion Automotive has identified several key areas for strategic growth and development, including the expansion of our dealership network and the introduction of new products and services. We are committed to providing our customers with exceptional products and services that meet their evolving needs. Our goal is to build long-term relationships with our customers, based on trust, quality, and reliability.

## Conclusion

By adopting a proactive approach to customer support, we can build trust, reduce churn, and drive revenue growth. Implementing the strategies outlined in this document will help us achieve our goal of exceptional customer care while maintaining operational efficiency.
