# Supplementary material
Source: ML conference proceedings conference paper supplement (https://openreview.net/forum?id=IGYQ4c92e2)
Supplement: supplementary_material [file Virtual-Health-Digital-Strategy.docx]

# Optimizing Virtual Healthcare Presence

## Introduction

In today's digital landscape, a robust online presence is crucial for telehealth providers like MediConn Solutions. As Content Marketing Manager, I will outline the essential components of a successful digital strategy, highlighting the key considerations for establishing a strong online presence.

## Targeting the Digital-First Patient

Our research team has been studying the effects of social determinants of health on patient outcomes in rural areas. This research has highlighted the importance of community-based initiatives in addressing health disparities. We're exploring ways to integrate these findings into our content marketing strategy.

## Digital Presence Components

Our analysis shows that a significant 40% of online consultations were booked through our mobile app in Q2 of 2025, highlighting the importance of mobile optimization in our digital presence. This finding underscores the need for a robust digital presence, including a modern, mobile-optimized website with clear calls-to-action, to cater to the busy lifestyles of digital-first patients. By optimizing our website and content marketing strategy, we can effectively attract these patients and provide them with the convenient, flexible care options they demand.

## Marketing Strategies for Virtual Healthcare

In our efforts to improve patient retention, we've been exploring the benefits of patient-centric communication channels. Our results show a 25% increase in patient engagement through targeted email campaigns. We're now focusing on refining our email marketing strategy to better address specific patient needs.

## Key Performance Indicators for Online Success

Our analytics team has been developing a new dashboard to track website performance. This has allowed us to identify areas for improvement, such as reducing bounce rates by 30%. We're now exploring ways to integrate this data into our marketing efforts.

## Future-Proofing Your Digital Presence

As part of our ongoing IT audits, we've been reviewing our disaster recovery processes. This has led to a more comprehensive approach to data backup and recovery, ensuring business continuity in the event of an outage. We're now exploring ways to integrate this process into our overall digital strategy.

## Conclusion

In conclusion, a well-designed digital presence is vital for attracting and retaining digital-first patients. By implementing the strategies outlined in this report, MediConn Solutions can establish itself as a leader in the virtual healthcare industry.
