# Supplementary material
Source: ML conference proceedings conference paper supplement (https://openreview.net/forum?id=IGYQ4c92e2)
Supplement: supplementary_material [file warehouse-cost-report.pdf › drbench/data/tasks/DR0003/files/DI005_pdf/warehouse-cost-report.pdf]

# Q1 2024 Warehouse Operations Cost Analysis Report

## Introduction

As part of our ongoing effort to optimize logistics and supply chain efficiency, this report provides an overview of Lee's Market warehouse operations costs for Q1 2024. The purpose of this analysis is to identify areas for cost reduction and process improvement. The report will cover key aspects of warehouse operations, including rental costs, inventory management, and transportation expenses. The insights gained from this analysis will inform strategic decisions for the remainder of the fiscal year.

## Warehouse Space Utilization and Optimization Strategies

To improve operational efficiency, our warehouse optimization project, launched in Q3 2023, focused on streamlining storage layouts and implementing a new inventory management system. As a result, we achieved a 12% reduction in stock retrieval times and an 8% increase in storage capacity. The project's success has prompted us to explore additional initiatives, such as implementing automated storage and retrieval systems. We anticipate these efforts will yield further productivity gains and cost savings.

## Inventory Turnover Rates and Stockholding Costs

Our inventory turnover analysis revealed that 75% of our top-selling SKUs have a turnover rate of 5-7 times per year, indicating a need for more frequent restocking. To address this, we have adjusted our replenishment schedules and implemented a just-in-time ordering system for high-demand items. This change is expected to reduce stockholding costs by 10% and minimize overstocking. We will continue to monitor inventory levels and adjust our strategies as needed.

## Total Warehouse Rental Costs for Q1 2024

The accounting department has implemented a new cost allocation methodology to better track and categorize warehouse expenses. This change will enable more accurate financial reporting and facilitate budgeting for future warehouse operations. The updated system is expected to be fully integrated by Q2 2024, providing a more comprehensive view of our warehouse costs. In the meantime, we are conducting a thorough review of our existing lease agreements.

## Transportation and Logistics Expense Review

Our logistics team has been working to renegotiate contracts with our transportation providers, aiming to secure more favorable rates and terms. We have successfully secured a 5% reduction in freight costs with one of our primary carriers, effective April 1, 2024. This change is expected to yield annual savings of \$120,000. We will continue to explore opportunities for cost reduction and efficiency improvements in our transportation network.

## Warehouse Labor Productivity and Efficiency Metrics

We have implemented a new labor management system to track and analyze warehouse labor productivity. Initial results indicate that our warehouse staff is operating at 92% efficiency, with opportunities for improvement in receiving and stocking processes. We are developing targeted training programs to address these areas and expect to see a 5% increase in productivity by the end of Q2 2024. This improvement will enable us to better manage our workforce and reduce labor costs.

## Conclusion

In conclusion, our analysis of Q1 2024 warehouse operations costs highlights opportunities for cost savings and process improvements. By implementing strategies to optimize warehouse space utilization and reduce inventory holding costs, we can improve our bottom line and enhance our competitive position. Recommendations for future actions will be presented to the logistics and supply chain management team for review and implementation. Ongoing monitoring and analysis of warehouse operations costs will be essential to ensuring the success of these initiatives.
