# Supplementary material
Source: ML conference proceedings conference paper supplement (https://openreview.net/forum?id=IGYQ4c92e2)
Supplement: supplementary_material [file Workforce-Development-Insights-2025.docx]

# Workforce Retention and Development Insights

## Introduction

As we continue to expand our virtual healthcare services, it is essential to monitor and analyze our workforce dynamics. This report provides an overview of the current employee tenure landscape, highlighting key trends and areas for improvement.

## Workforce Composition and Turnover Rates

Our workforce has seen a significant shift in the past year, with an increase in remote work arrangements. This change has allowed us to tap into a wider talent pool, but it also presents its own set of challenges, such as ensuring proper communication and collaboration among team members.

## Employee Engagement and Morale

A recent survey revealed that 80% of our employees feel motivated and engaged in their work, citing the company's commitment to innovation and employee development as key factors. We're proud of this achievement and will continue to prioritize employee satisfaction through various initiatives.

## Training and Development Initiatives

Our training programs have been revamped to focus on emerging technologies and industry trends, ensuring our employees stay ahead of the curve. For instance, our recent partnership with a leading EdTech company provided our team with access to cutting-edge content and resources.

## Promotion and Career Advancement Opportunities

We've implemented a new performance-based promotion system, allowing employees to advance their careers based on their individual performance and contributions. This approach has led to a significant increase in employee satisfaction and retention rates.

## Employee Retention Strategies and Recommendations

A key aspect of our retention strategy is providing opportunities for growth and development, as well as fostering a positive work-life balance. We're constantly exploring new ways to improve our employee experience, including flexible work arrangements and employee wellness programs.

## Quarterly Employee Tenure Analysis

Our quarterly reports provide valuable insights into employee turnover rates, helping us identify trends and patterns. This information is crucial in informing our retention strategies and making data-driven decisions.

## Conclusion

This report highlights the importance of regularly monitoring and addressing workforce retention and development. Recommendations for improvement include implementing targeted training programs, promoting from within, and enhancing employee engagement initiatives.
