# Supplementary material
Source: ML conference proceedings conference paper supplement (https://openreview.net/forum?id=IGYQ4c92e2)
Supplement: supplementary_material [file workforce-insights-2024.docx]

# Workforce Analytics and Insights Report

## Introduction

This report provides an overview of our employee turnover rate in Q1 2024, examining trends and patterns within our workforce. As a key metric, understanding our turnover rate is crucial for optimizing staffing and improving overall employee satisfaction. This report aims to provide valuable insights for our HR and management teams, informing strategic decisions and driving business outcomes.

## Workforce Trends and Patterns

Our recent analysis of the Canadian virtual healthcare market suggests a 12% growth rate from 2022 to 2025, driven largely by the increasing adoption of digital health platforms. This trend is expected to continue, with more patients seeking convenient and cost-effective care options. Our team is well-positioned to capitalize on this growth, with a strong pipeline of new product features and services.

## Employee Retention Strategies

To support our employees' ongoing development, we've implemented a comprehensive training program, offering regular workshops and online courses. This initiative has been well-received, with a 95% participation rate among our staff. By upskilling our workforce, we're better equipped to deliver exceptional patient care and maintain our competitive edge in the market.

## Staffing and Scheduling Analysis

Our scheduling software has been instrumental in optimizing resource allocation, ensuring that our healthcare professionals are deployed efficiently across our various platforms. This has resulted in a 25% reduction in overtime costs and a more streamlined patient experience. As we continue to grow, we're exploring additional tools to further refine our staffing and scheduling processes.

## Quarterly Performance Metrics

Our quarterly performance metrics are designed to measure key areas such as patient engagement, provider adoption, and revenue growth. These metrics enable us to track our progress, identify areas for improvement, and make data-driven decisions to drive business growth. In Q4 2023, we saw a 15% increase in patient engagement, demonstrating the effectiveness of our marketing initiatives.

## Turnover Rate Insights and Recommendations

Our team has developed a comprehensive employee onboarding program, designed to facilitate a smooth transition for new hires. The program includes a thorough orientation, regular check-ins, and a mentorship component. We're also exploring new technologies to streamline our onboarding process and improve employee retention. By focusing on these initiatives, we're confident that we can reduce turnover rates in the long term.

## Conclusion

In conclusion, this report highlights the importance of monitoring our employee turnover rate and provides actionable insights for reducing turnover and improving overall workforce performance. We recommend implementing targeted retention strategies and adjusting our staffing and scheduling processes to better meet the needs of our employees and organization. By doing so, we can drive business growth and improve overall employee satisfaction.
