# Supplementary material
Source: ML conference proceedings conference paper supplement (https://openreview.net/forum?id=IGYQ4c92e2)
Supplement: supplementary_material [file workforce-metrics-report.pdf › drbench/data/tasks/DR0013/files/qa_1755714219/workforce-metrics-report.pdf]

# Elexion Automotive Q3 Workforce Metrics Report

## Introduction

As we continue to navigate the complexities of the electric vehicle market, it is essential to maintain a strong and agile workforce. This report provides an overview of key workforce metrics for Q3 2024, highlighting areas of strength and opportunities for improvement. The insights presented here will inform strategic decisions regarding talent acquisition, retention, and development initiatives. By analyzing these metrics, we can optimize our workforce to drive business success and support our mission to accelerate the transition to zero-emission transportation.

## Workforce Demographics and Diversity Trends

As of 2023, our female workforce participation rate reached 42%, exceeding the industry average by 5%. We have also seen a 15% increase in employees from underrepresented ethnic groups since 2020. These trends are a testament to our commitment to fostering a diverse and inclusive work environment. Furthermore, we have implemented training programs to address unconscious bias and promote cultural awareness.

## Employee Engagement and Satisfaction Drivers

Our quarterly pulse surveys have shown that 80% of employees are satisfied with their job roles, and 90% feel that their work contributes to the company's overall mission. We have also seen a significant increase in employee participation in our corporate social responsibility initiatives, with 500 employees volunteering for our annual community service day in 2023. Additionally, we have implemented a recognition and rewards program to acknowledge employees' outstanding contributions.

## Q3 Turnover and Retention Performance Metrics

Our recruitment team has successfully reduced the average time-to-hire by 30% since 2022, allowing us to quickly fill open positions and minimize disruption to our operations. We have also implemented a robust onboarding program, which has resulted in a 25% decrease in new hire turnover within the first six months of employment. Furthermore, we have enhanced our employee value proposition to attract top talent in the industry.

## Strategic Workforce Planning and Succession Management

We have identified key positions that require succession planning and have developed a comprehensive plan to ensure a smooth transition of leadership roles. As part of this plan, we have established a mentorship program that pairs high-potential employees with senior leaders. Additionally, we have created a talent pipeline to track and develop future leaders, with 20 employees currently participating in the program.

## Conclusion

In conclusion, the Q3 workforce metrics report highlights the need for targeted initiatives to enhance employee retention and engagement. By addressing these areas, we can improve our overall workforce performance and drive business success. Recommendations for next steps include developing a comprehensive employee retention strategy and implementing targeted training and development programs. By taking proactive steps to optimize our workforce, we can ensure Elexion Automotive remains a leader in the electric vehicle market.
