# Supplementary material
Source: ML conference proceedings conference paper supplement (https://openreview.net/forum?id=IGYQ4c92e2)
Supplement: supplementary_material [file Workforce-Retention-Insights-2025.docx]

# Workforce Retention and Development Insights

## Introduction

As Lee's Market continues to grow, maintaining a stable and skilled workforce is crucial to our success. This report provides an overview of average employee tenure and highlights areas for improvement.

## Talent Acquisition Strategies

Lee's Market has established a robust recruitment process, leveraging various channels to attract top talent. Our hiring managers conduct thorough interviews, assessing candidates' skills and cultural fit. We've also implemented a referral program, incentivizing current employees to refer friends and family. As a result, we've seen a significant increase in qualified applications.

## Employee Engagement Trends

Our employee engagement surveys have shown that employees are generally satisfied with their role and the company's overall mission. We've noticed a correlation between employee engagement and sales performance, with engaged employees driving higher customer satisfaction. To further boost morale, we've introduced flexible work arrangements and regular team-building activities.

## Staff Turnover Analysis

A recent analysis of our staff turnover rates revealed that our highest turnover is in the logistics department. We've identified that this is largely due to the physically demanding nature of the job. To mitigate this, we're exploring alternative roles for exiting employees and implementing ergonomic improvements in our warehouse.

## Retention and Development Initiatives

To retain our top performers, we've introduced a comprehensive professional development program. This includes regular training sessions, mentorship opportunities, and tuition reimbursement. We're also exploring opportunities for internal mobility, allowing employees to rotate through different departments and gain new skills.

## Conclusion

Our findings suggest that employee tenure is a critical indicator of overall workforce performance. To address potential issues, we recommend implementing targeted training programs and enhancing communication channels to increase employee satisfaction.
